# Supplementary material for: A sensorimotor model shows why a spectral jamming avoidance response does not help bats deal with jamming
Source: eLife. 2020 Jul 28;9:e55539. doi: 10.7554/eLife.55539 (PMC7406351; doi:10.7554/eLife.55539)
Supplement: Figure 2—figure supplement 1—source data 1. [file elife-55539-fig2-figsupp1-data1.txt]

SelfCorr	MaskCorr	SINR	NOB	JARmode
51.8064139112284	16.1491979890939	35.6572159221346	3	0
58.5144849631622	10.6745377976523	47.8399471655098	3	0
58.6175013406966	12.5065008394399	46.1110005012568	3	0
57.2994684975961	14.5140622525859	42.7854062450102	3	0
56.9631318080042	-1.67644398791415	58.6395757959184	3	0
55.8983738630025	2.16192810830167	53.7364457547009	3	0
55.1156290299045	10.1644139851114	44.9512150447931	3	0
51.2810399636725	-6.42227092499452	57.703310888667	3	0
52.3471619232403	0.537448694944045	51.8097132282962	3	0
44.4687301504837	-0.561211444648227	45.029941595132	3	0
45.9349226913712	-1.65438597611153	47.5893086674827	3	0
47.6044753505012	20.6193207769123	26.9851545735889	3	0
49.5773461589256	20.7810246427267	28.7963215161989	3	0
51.7928452838061	-17.188715265884	68.9815605496902	3	0
54.3346855012632	-24.2390877439864	78.5737732452496	3	0
57.3004146251663	-34.5289969970018	91.8294116221681	3	0
60.8775589745809	-2.4759712597273	63.3535302343082	3	0
65.3691081725041	-1.51172481356956	66.8808329860737	3	0
39.6805637660074	5.08208909491549	34.5984746710919	3	0
24.3413421969326	4.1822740345509	20.1590681623817	3	0
25.675468617457	2.96586287744612	22.7096057400109	3	0
45.5695667359186	-27.3738436639994	72.943410399918	3	0
48.3899589361082	-16.9041808945547	65.2941398306629	3	0
50.3653555469693	-43.3224104474704	93.6877659944397	3	0
50.2846296517195	9.35662903053786	40.9280006211817	3	0
51.0826891090491	18.6455851146574	32.4371039943917	3	0
52.1548639596059	-18.610907098434	70.76577105804	3	0
51.7061287107912	-16.3452703605638	68.051399071355	3	0
50.368970573731	-48.9350304909457	99.3040010646766	3	0
49.2317549476577	9.2261863195677	40.00556862809	3	0
48.6777938361377	-20.3262620053483	69.004055841486	3	0
47.1584696325131	-49.7577138834519	96.916183515965	3	0
48.9857699786633	2.09571150003316	46.8900584786302	3	0
48.03106444184	45.7723575023331	2.25870693950695	3	0
47.7719378059983	-22.4423864004161	70.2143242064144	3	0
52.2556860805607	-2.78256382569505	55.0382499062558	3	0
40.6925466667735	-16.8892743850739	57.5818210518474	3	0
41.3671120229751	-5.16188825625399	46.529000279229	3	0
42.0895570498715	-31.253820501856	73.3433775517275	3	0
42.7927782399799	-32.8985725956391	75.6913508356191	3	0
43.606668160225	-52.7654849230886	96.3721530833136	3	0
44.460595398582	-71.0418192108115	115.502414609393	3	0
45.297377022056	-3.35037591980038	48.6477529418564	3	0
46.2352251187019	5.81922595946629	40.4159991592356	3	0
47.2207519155251	35.8996808677465	11.3210710477786	3	0
48.2645517752302	-25.2228536957817	73.487405471012	3	0
49.3767777074634	-15.3943290801386	64.7711067876021	3	0
50.5252027008487	-18.4602603730778	68.9854630739265	3	0
51.817631783404	-32.6862291334447	84.5038609168486	3	0
53.1661834839496	-20.4402167947525	73.6064002787021	3	0
54.6462659392338	-2.78902075732763	57.4352866965615	3	0
56.1903811072165	0.0307015634384496	56.1596795437781	3	0
57.9127611359707	-34.3659953701479	92.2787565061186	3	0
59.7991327850586	-32.1424541195662	91.9415869046248	3	0
61.8923433041253	32.6257202919401	29.2666230121852	3	0
17.5171244870178	33.5894349136747	-16.0723104266569	3	0
17.9410404685438	13.6819740675854	4.25906640095836	3	0
24.2012336479533	-55.774398396336	79.9756320442894	3	0
29.7839088632845	6.69020443326248	23.093704430022	3	0
33.7608391300626	6.45724305548697	27.3035960745756	3	0
35.9424650423165	8.65314930294561	27.2893157393709	3	0
38.024184555358	1.62177932585974	36.4024052294983	3	0
45.8228405768177	4.41626489172626	41.4065756850915	3	0
48.4173757295101	3.34902415048956	45.0683515790205	3	0
52.6441984085665	-16.4946952019466	69.1388936105132	3	0
59.3428083960306	-17.5672375407513	76.9100459367819	3	0
56.7115889856497	-16.6942254496574	73.405814435307	3	0
54.9713875414713	-29.542229418798	84.5136169602693	3	0
55.5252807877858	3.34735640568455	52.1779243821012	3	0
56.7549123804178	-25.7132184550013	82.4681308354191	3	0
54.3530818315778	-25.9157341230568	80.2688159546346	3	0
50.1360985128685	1.19668757925483	48.9394109336137	3	0
41.5547465878188	10.6528603600129	30.9018862278059	3	0
42.4953666635081	12.8589720354976	29.6363946280105	3	0
43.4265312999179	-1.33096871654213	44.75750001646	3	0
44.3350557279372	-23.6037642865503	67.9388200144875	3	0
45.2234850012714	-44.5270300115365	89.7505150128079	3	0
46.0626350526618	-38.3791148178481	84.4417498705099	3	0
46.8100620892905	2.36810567249233	44.4419564167982	3	0
47.4227076325529	-0.635773015564397	48.0584806481173	3	0
47.8554418728832	-0.202782692381599	48.0582245652648	3	0
48.0425784555301	17.881971390385	30.1606070651452	3	0
47.9266463249331	-7.5841119022564	55.5107582271895	3	0
47.4918970790048	-26.6637110708493	74.1556081498541	3	0
46.7801769178048	-31.8834238860279	78.6636008038327	3	0
45.9005232945351	-10.7616224736006	56.6621457681357	3	0
45.0017142333321	-2.93175010392818	47.9334643372603	3	0
44.2105529156556	-0.744428735755293	44.9549816514109	3	0
12.8601039201983	15.9101227632374	-3.05001884303911	3	0
35.2544590827372	-0.737996760462974	35.9924558432002	3	0
35.9216027455714	-24.8613774738768	60.7829802194482	3	0
39.5933062642455	14.8284149421723	24.7648913220732	3	0
42.1369004506828	7.82557154044292	34.3113289102398	3	0
45.7228981564248	3.84311284868868	41.8797853077361	3	0
48.5153258026372	5.04276764554433	43.4725581570929	3	0
46.0591674907174	18.1420909486103	27.9170765421071	3	0
46.8582448149257	-14.2557327559352	61.1139775708609	3	0
46.5501309050345	-20.3177780093695	66.8679089144039	3	0
48.149928708505	0.612868696102963	47.5370600124021	3	0
41.2372775824159	-2.15946313201223	43.3967407144281	3	0
42.3673566551696	-0.374694428316664	42.7420510834863	3	0
43.4768470321671	-1.00383300929539	44.4806800414625	3	0
44.7446185864593	10.3936063280058	34.3510122584535	3	0
46.0928263248654	20.5188272919498	25.5739990329156	3	0
47.529456012938	-5.30280284950131	52.8322588624393	3	0
49.062267196338	0.86305369244195	48.1992135038961	3	0
50.6974279677823	-20.0046990649974	70.7021270327797	3	0
52.4366096543397	-35.6764132691441	88.1130229234838	3	0
54.2904277663405	-2.14957643547351	56.440004201814	3	0
56.2749546387862	-47.3711165334012	103.646071172187	3	0
58.3618650529575	-53.8234184443892	112.185283497347	3	0
60.4319489544784	-57.3220271212546	117.753976075733	3	0
62.2930113702867	10.8230239891662	51.4699873811206	3	0
35.1218683356126	8.68331467129255	26.4385536643201	3	0
35.915719751604	3.57489328797853	32.3408264636255	3	0
40.2617172087331	-12.035366085671	52.2970832944041	3	0
44.0789040135219	-32.0951607733164	76.1740647868383	3	0
47.063842288853	-13.1944096701872	60.2582519590402	3	0
50.9839169762269	-40.5807702982835	91.5646872745103	3	0
55.9455172581958	28.4665503609625	27.4789668972333	3	0
55.7088653902781	-8.75180729804159	64.4606726883197	3	0
48.7452227555772	-8.70869322253063	57.4539159781079	3	0
49.919629644118	-6.81257290050005	56.7322025446181	3	0
41.5725371447953	-0.222515751550813	41.7950528963461	3	0
42.4296860465824	-0.679451386501533	43.1091374330839	3	0
43.2778400288434	-0.732435935071175	44.0102759639146	3	0
44.1127941004747	-0.422619476741204	44.5354135772159	3	0
44.9339860373842	0.449928447186916	44.4840575901973	3	0
45.7206367833286	1.06150903274931	44.6591277505792	3	0
46.4483659240942	1.6087645594968	44.8396013645974	3	0
47.1048766663776	27.4488447742047	19.6560318921728	3	0
47.6520010879623	28.5189825591851	19.1330185287772	3	0
48.0444632917712	-1.19050793735225	49.2349712291234	3	0
48.2449540179648	3.53157269127993	44.7133813266849	3	0
48.2205302232503	-6.15400108229503	54.3745313055453	3	0
47.950813943026	-4.6537473266424	52.6045612696684	3	0
47.4372427083541	-24.9712704484819	72.408513156836	3	0
46.7097523181999	-34.2832936221858	80.9930459403857	3	0
45.8261703263884	-27.4209760783133	73.2471464047018	3	0
44.8615625199667	-27.4652514193738	72.3268139393406	3	0
43.8901577983589	-27.5190681740282	71.4092259723871	3	0
42.9678196375201	-27.5835417792268	70.5513614167469	3	0
42.1232231061043	-27.6599870983048	69.7832102044091	3	0
41.3600825765352	-27.7499654813647	69.1100480578998	3	0
10.7130942687707	2.32249932991878	8.39059493885188	3	0
12.5025268795026	-34.0556913198453	46.5582181993479	3	0
12.9884851221386	-35.3994000915194	48.3878852136581	3	0
15.8221371275731	3.8913188251219	11.9308183024511	3	0
16.1006884349433	15.4652232105901	0.635465224353172	3	0
18.9360738785289	-2.87341231924618	21.8094861977751	3	0
19.3679549661793	1.59374604108101	17.7742089250983	3	0
22.3542198505493	16.2778494824391	6.07637036811016	3	0
22.9362771518048	-33.7708691458131	56.7071462976179	3	0
26.2629341752499	-16.9736966618206	43.2366308370705	3	0
27.0818527751374	15.9210330302428	11.1608197448946	3	0
30.2470651274312	-20.9065545401813	51.1536196676126	3	0
48.5222266202803	-8.86155212709131	57.3837787473716	3	0
47.7323590331774	-8.81571719657406	56.5480762297515	3	0
46.550271548573	3.56085162855164	42.9894199200214	3	0
45.9867822701499	-49.3740092363917	95.3607915065417	3	0
46.2483236812041	4.43943021358541	41.8088934676187	3	0
44.5749770333414	-30.4675342671652	75.0425113005067	3	0
43.8017525643667	-6.7275706478181	50.5293232121848	3	0
44.3096190157803	-43.3797705556369	87.6893895714172	3	0
43.3561604887492	-52.7546596171765	96.1108201059257	3	0
41.2939358247163	27.3514933439671	13.9424424807492	3	0
42.1245337935054	-21.1673639248389	63.2918977183443	3	0
42.8742372928323	-25.2485185539894	68.1227558468217	3	0
40.3897399703618	-6.79146067429999	47.1812006446618	3	0
40.8341766103153	24.495635551043	16.3385410592723	3	0
40.289510483931	2.42606713650251	37.8634433474285	3	0
40.8108748512773	-6.38420028759229	47.1950751388696	3	0
41.4944476104673	-30.4532135534632	71.9476611639305	3	0
40.6485301407661	2.10113730920626	38.5473928315598	3	0
41.5656313718903	4.81801833064927	36.747613041241	3	0
41.0451334663254	-26.2314792532556	67.276612719581	3	0
42.349393151775	-24.3568274613138	66.7062206130888	3	0
41.8815594486442	-5.66718425071085	47.548743699355	3	0
41.7098189217036	14.9806781224473	26.7291407992562	3	0
41.5573176227167	6.07983792727789	35.4774796954388	3	0
40.3695226987873	0.37427902529954	39.9952436734878	3	0
39.4868605083917	-31.8764099370372	71.3632704454289	3	0
39.3377634389943	-13.1312610097931	52.4690244487874	3	0
39.5501214838193	-25.8854457996992	65.4355672835184	3	0
37.9747520357916	-3.94123223018703	41.9159842659787	3	0
38.2882680700128	8.66079116795854	29.6274769020543	3	0
38.6018505550717	-10.0076069175491	48.6094574726208	3	0
38.9060934058337	-39.2657395933156	78.1718329991492	3	0
39.2022117255254	-13.8454557808459	53.0476675063712	3	0
39.4935376785231	-42.7055358882369	82.1990735667599	3	0
39.7719333745683	-37.9412999823907	77.713233356959	3	0
40.0381722776536	-40.5297969113854	80.5679691890389	3	0
40.2947074852775	-2.12887481284919	42.4235822981267	3	0
40.5332186891072	9.02891380319137	31.5043048859159	3	0
40.7541259946178	-12.4113473968909	53.1654733915088	3	0
40.9578568893931	-12.3212396078656	53.2790964972587	3	0
41.1357114439428	-53.6209935236592	94.756704967602	3	0
41.287129011966	-39.7538487077604	81.0409777197265	3	0
41.4075809409192	-43.9153859632224	85.3229669041416	3	0
41.4932096045236	-42.4275217681047	83.9207313726283	3	0
41.5464075306165	-2.78882976182629	44.3352372924428	3	0
41.5633286479111	9.38983505583547	32.1734935920757	3	0
41.5437749858944	-12.9144719941313	54.4582469800257	3	0
41.484757319311	-45.0106617625963	86.4954190819072	3	0
41.3867497927865	-37.3983621990567	78.7851119918432	3	0
41.2228766024674	-38.4074216379622	79.6302982404296	3	0
40.9396814324408	-70.6597512872161	111.599432719657	3	0
40.6561671098131	-44.978707667499	85.6348747773121	3	0
40.3782381514493	7.41757684625602	32.9606613051933	3	0
40.110357886646	-9.14482414107811	49.2551820277241	3	0
39.8556735277065	-51.3668690261891	91.2225425538956	3	0
39.6229283439354	7.40694572046843	32.215982623467	3	0
39.4161476904303	-18.5906710396044	58.0068187300347	3	0
39.2330957299006	-43.6762925862019	82.9093883161024	3	0
39.0745681108774	6.62674223170415	32.4478258791733	3	0
38.9423386277144	-20.4344919814686	59.3768306091829	3	0
38.8367535435157	-7.93508742884656	46.7718409723622	3	0
38.7651229629032	5.57648501527149	33.1886379476317	3	0
38.7292401375843	-22.7635732285555	61.4928133661398	3	0
38.7308673461594	6.49839334156453	32.2324740045949	3	0
38.7718112045284	-23.5062032815293	62.2780144860576	3	0
38.8539731207641	5.21498635599984	33.6389867647643	3	0
38.9793772278204	-26.2332703220407	65.212647549861	3	0
39.1501772420491	4.44785674704117	34.7023204950079	3	0
39.3686424746771	4.17971313525322	35.1889293394239	3	0
39.6318140954799	-29.8963829344291	69.528197029909	3	0
39.9107975786546	3.69765259242373	36.2131449862309	3	0
40.2091731353154	20.1544522420369	20.0547208932785	3	0
40.5188930902804	20.2033575818436	20.3155355084368	3	0
40.8407351944552	20.2495656173114	20.5911695771438	3	0
41.1716958991804	20.2921106873209	20.8795852118595	3	0
41.5119435582409	20.3311105419069	21.1808330163339	3	0
41.8690671783221	20.3666177801508	21.5024493981713	3	0
42.2534451177805	20.3989217823588	21.8545233354217	3	0
42.6588892095867	20.4283132290828	22.2305759805038	3	0
43.0761993996531	20.454082028827	22.6221173708262	3	0
43.5060038610482	20.4758404794807	23.0301633815674	3	0
43.9490338969213	20.4941278242414	23.4549060726799	3	0
44.4061181905702	20.5092529435867	23.8968652469835	3	0
44.8781790630577	20.521447097325	24.3567319657327	3	0
45.3662302799567	20.5309280471744	24.8353022327823	3	0
45.8713759287756	20.5380959769029	25.3332799518727	3	0
46.3948098191497	20.5430260407929	25.8517837783568	3	0
46.9378147206921	20.5457100497787	26.3921046709135	3	0
47.5017605195379	20.5462489085619	26.955511610976	3	0
48.1092861218113	20.5447182616154	27.5645678601958	3	0
48.8415637300002	20.5411703550488	28.3003933749514	3	0
49.628599945043	20.5356357170054	29.0929642280375	3	0
50.4760815188422	20.5281246899115	29.9479568289306	3	0
51.3908348074117	20.5186288479653	30.8722059594464	3	0
52.3811126867578	20.5071223343824	31.8739903523754	3	0
53.4569829708419	20.4935631552109	32.963419815631	3	0
54.6308629981182	20.4778944701379	34.1529685279804	3	0
55.9139680582364	20.4600459258115	35.4539221324249	3	0
57.325311605536	20.4399350840048	36.8853765215311	3	0
58.8921737758819	20.417420027418	38.4747537484639	3	0
60.6468244422595	20.3919699392437	40.2548545030158	3	0
17.287938590442	7.19851939601589	10.0894191944261	3	0
23.946386688136	-11.866375403803	35.8127620919391	3	0
28.0310477614324	-15.1284677289356	43.159515490368	3	0
26.7294292126991	1.34423548209177	25.3851937306074	3	0
31.2225701642759	-3.80311389683457	35.0256840611105	3	0
31.4581570088085	-9.046651156094	40.5048081649025	3	0
35.4622911458986	-10.761966257283	46.2242574031816	3	0
36.8017426817978	-13.3234763266574	50.1252190084552	3	0
38.9365534258487	-9.6338463664477	48.5703997922964	3	0
42.34426672234	4.28212291098261	38.0621438113574	3	0
42.6531552555171	3.34036923628791	39.3127860192292	3	0
46.9183546486111	-1.79963728708885	48.7179919356999	3	0
51.2623900198054	-19.7441834468346	71.0065734666401	3	0
55.0613364051177	6.39557767318917	48.6657587319285	3	0
49.8236001688086	-43.8227878762981	93.6463880451067	3	0
47.6517177152508	17.0973877220108	30.5543299932401	3	0
47.9370793112825	-3.29003184641093	51.2271111576934	3	0
49.0900221546848	-12.0794969536515	61.1695191083363	3	0
50.7015003510568	0.993984806905646	49.7075155441511	3	0
46.9131309781172	-12.7874800219736	59.7006110000908	3	0
46.2967547129485	-47.9826551451836	94.2794098581321	3	0
46.1354207604838	23.5442831587062	22.5911376017776	3	0
46.0148021465646	23.4733645439637	22.5414376026009	3	0
45.2879751223832	26.0319453239925	19.2560297983907	3	0
41.4270142552774	-40.3560365825115	81.7830508377889	3	0
40.1988115877946	21.481621334123	18.7171902536716	3	0
38.2873950147385	-6.31179527131012	44.5991902860486	3	0
37.2322254274536	-15.363115011785	52.5953404392386	3	0
35.4919385144427	-51.0673744644346	86.5593129788773	3	0
34.7716902177271	22.1520755491361	12.6196146685909	3	0
32.8078517188603	-31.5611664052114	64.3690181240718	3	0
31.4222694863407	-32.865953680253	64.2882231665937	3	0
29.089833246571	-32.6938534122701	61.783686658841	3	0
26.7321370577977	1.78068674832519	24.9514503094725	3	0
23.6398607421951	-10.3970692131542	34.0369299553492	3	0
21.9483703991136	-30.0392761915007	51.9876465906142	3	0
23.3750591420163	-39.8947614574109	63.2698205994272	3	0
24.4925393777903	25.5788470556785	-1.08630767788817	3	0
25.3637910663279	-2.71173356750391	28.0755246338318	3	0
26.2881378545336	-8.42218322222887	34.7103210767625	3	0
25.6774570644769	-26.1234416693216	51.8008987337985	3	0
25.5333211109327	-33.2829894378008	58.8163105487334	3	0
25.5513232957823	-36.1132291181059	61.6645524138881	3	0
25.8492942944102	-64.2393781914687	90.0886724858789	3	0
25.6573526507304	15.3217944858492	10.3355581648812	3	0
26.082961582648	-36.1192580826785	62.2022196653265	3	0
31.0479625230344	-43.0751550823419	74.1231176053763	3	0
25.1718154118828	18.5089315187298	6.66288389315299	3	0
25.5109570811871	-7.27873309535706	32.7896901765442	3	0
24.3161732503985	-4.39912234346648	28.715295593865	3	0
26.8816884843003	-16.6153705849664	43.4970590692667	3	0
24.6591751238108	-33.0761074311893	57.7352825550001	3	0
24.8879484712435	-29.1506673350165	54.03861580626	3	0
26.1570762209569	-54.5301822407958	80.6872584617527	3	0
25.835288380024	-0.270263381694593	26.1055517617186	3	0
24.7842798500613	-35.6477886165732	60.4320684666345	3	0
23.4935156866786	19.5290199156938	3.96449577098482	3	0
25.1312505033757	-10.7647907178465	35.8960412212222	3	0
28.8411326527805	-25.1133625352909	53.9544951880713	3	0
24.5010692548002	0.439244651176947	24.0618246036233	3	0
24.0348922887816	-28.6964450538133	52.7313373425948	3	0
23.2603989877024	-73.6730400683337	96.9334390560361	3	0
22.3113039932451	1.46363379736927	20.8476701958758	3	0
27.0206045672354	-5.65794711114035	32.6785516783757	3	0
26.5888036354338	-25.5819500516696	52.1707536871035	3	0
27.640127874501	-31.6617207711919	59.3018486456928	3	0
20.6328791124455	1.67421529257926	18.9586638198662	3	0
21.6591251379829	-38.2495738868017	59.9086990247846	3	0
22.5016216828823	-33.3212378776028	55.8228595604851	3	0
28.3800979134289	9.02674159001871	19.3533563234102	3	0
24.582681996574	-36.8603477192299	61.4430297158039	3	0
24.7722950527939	-0.313449913779378	25.0857449665732	3	0
26.2431773160071	-30.5942575629705	56.8374348789775	3	0
27.4843985881205	-35.2151573321506	62.6995559202711	3	0
27.8463081473257	-69.2324372316108	97.0787453789365	3	0
28.5694955979074	-2.71207736740879	31.2815729653161	3	0
29.3693534919187	3.41927004188599	25.9500834500327	3	0
35.0250922160599	-42.8017751677088	77.8268673837687	3	0
29.7987627060325	-34.6668919935498	64.4656546995823	3	0
35.8258298663912	-50.4603842153455	86.2862140817367	3	0
36.217769843933	-62.0353564922174	98.2531263361504	3	0
31.9963205309797	0.534540828872963	31.4617797021067	3	0
37.1479261975218	-16.1714378712612	53.319364068783	3	0
37.6040087287586	-14.3294009590009	51.9334096877595	3	0
38.0825785300205	-5.2196352870773	43.3022138170978	3	0
38.583487072212	-48.0854415441534	86.6689286163655	3	0
39.1061360694272	-45.4791297694336	84.5852658388608	3	0
39.6512073759306	-45.7654189332525	85.4166263091831	3	0
40.2232647734078	-54.1508461379577	94.3741109113655	3	0
40.8256924785007	-16.8979505375778	57.7236430160785	3	0
41.4602267560346	-48.1607574548926	89.6209842109273	3	0
42.1300669346541	-62.9605113196762	105.09057825433	3	0
42.838830178106	-4.03287721216702	46.871707390273	3	0
43.584148234398	-40.7272513294171	84.3113995638151	3	0
44.3714603644613	-60.8269026501983	105.19836301466	3	0
45.2082570398482	-47.2133034799498	92.421560519798	3	0
46.0992426827105	-17.7665787067568	63.8658213894673	3	0
47.0420196787172	-41.9543007516731	88.9963204303903	3	0
48.0445560162697	-93.7202404424135	141.764796458683	3	0
49.1186488333144	-47.339639270305	96.4582881036194	3	0
50.262452161263	-0.273101167508184	50.5355533287712	3	0
51.4866665559503	-65.9015670105921	117.388233566542	3	0
52.7964198385639	-46.2981712409271	99.094591079491	3	0
54.2040418368614	-16.4260786075701	70.6301204444315	3	0
55.7251435839432	-42.0484339423919	97.773577526335	3	0
57.3628927593856	-78.5183550620918	135.881247821477	3	0
36.4368761453016	17.6514500468296	18.785426098472	3	0
38.489697509405	11.3662746231299	27.1234228862751	3	0
40.9655053735571	10.9884238834947	29.9770814900624	3	0
42.3673894072698	12.5952699194475	29.7721194878223	3	0
45.753393120054	8.36564556732028	37.3877475527337	3	0
48.3271871048224	6.71363917662498	41.6135479281974	3	0
50.7125648676249	15.0510947658441	35.6614701017808	3	0
52.5788897538429	3.50656870033735	49.0723210535056	3	0
56.878025581855	3.36041696547568	53.5176086163793	3	0
56.1092784198272	7.78789624102625	48.3213821788009	3	0
52.4135975770825	12.9801055783425	39.43349199874	3	0
48.9330591715202	-33.8760195912472	82.8090787627674	3	0
48.7046736544148	2.66215634614759	46.0425173082672	3	0
46.0821860857682	26.8956582508605	19.1865278349078	3	0
43.3918939336237	3.33855049222666	40.0533434413971	3	0
41.4283809442849	-28.2606982290739	69.6890791733588	3	0
40.2282242989923	-0.132747244372029	40.3609715433643	3	0
38.1561264502938	0.406637215118335	37.7494892351755	3	0
37.8639012002381	0.130292333369595	37.7336088668685	3	0
36.0334304970374	-0.333827327110823	36.3672578241483	3	0
34.9021787130231	0.488448575795339	34.4137301372278	3	0
37.7071032430291	-1.65832210796919	39.3654253509983	3	0
37.8805970261698	-1.94589340055288	39.8264904267227	3	0
38.0006273211823	-1.27489835971333	39.2755256808956	3	0
38.0630794812425	-1.90919493207389	39.9722744133164	3	0
38.0671340866161	32.8604904438653	5.20664364275076	3	0
38.0137043925167	34.8510526634696	3.1626517290471	3	0
37.9056356730981	11.203435420375	26.702200252723	3	0
37.7477476381173	-2.58317472844675	40.3309223665641	3	0
37.5426532044515	-1.64705247576489	39.1897056802164	3	0
37.2963231560582	-27.9725797380787	65.2689028941369	3	0
37.0461104694096	-49.5331279391458	86.5792384085554	3	0
21.64000681151	-9.41659942579852	31.0566062373085	3	0
17.1778883082602	-7.9412238560869	25.1191121643471	3	0
24.621089719273	-3.73369406472472	28.3547837839978	3	0
29.0688912216333	-13.6351350193645	42.7040262409978	3	0
29.6458084793537	-16.3007013672489	45.9465098466025	3	0
32.6893737114333	-13.2696212694818	45.9589949809152	3	0
35.0327913904664	-15.9084351544734	50.9412265449398	3	0
36.0021472830085	-3.33362881866864	39.3357761016771	3	0
36.4502942257659	-9.02544848820051	45.4757427139664	3	0
42.2620802507753	-30.0237428357288	72.285823086504	3	0
46.001250166614	-5.12156446738918	51.1228146340031	3	0
49.367763829787	18.3927187906863	30.9750450391007	3	0
49.692409249221	0.560539387504237	49.1318698617168	3	0
54.5072963886294	-13.1077492439133	67.6150456325427	3	0
53.9480239722848	16.7790716505282	37.1689523217566	3	0
50.8813440078504	-30.8420336580441	81.7233776658945	3	0
50.5076367211102	13.8917637028514	36.6158730182588	3	0
51.8047126338357	11.2783937824808	40.5263188513549	3	0
52.8241309091888	-12.2958214792109	65.1199523883997	3	0
53.2477539687863	9.73605296850428	43.511701000282	3	0
53.7610730358475	-1.79179667440233	55.5528697102498	3	0
54.1188010464029	-0.829617752233733	54.9484187986366	3	0
51.2152417275434	-0.952427017741253	52.1676687452847	3	0
51.9976656702826	-0.797445767796977	52.7951114380796	3	0
49.2582975662317	-0.932098701279773	50.1903962675114	3	0
48.0971271779862	-0.883803094161634	48.9809302721478	3	0
48.6668021139523	-0.194945935251694	48.861748049204	3	0
47.2268622420053	-0.286103239749717	47.512965481755	3	0
46.9552034217476	-44.4313979513458	91.3866013730934	3	0
46.8042137922597	-1.18157175834958	47.9857855506093	3	0
46.5035360201758	-44.4953833133601	90.9989193335359	3	0
40.2324738991569	11.6022308957824	28.6302430033745	3	0
40.7523400246181	11.6410988917031	29.111241132915	3	0
41.2715766205865	11.5544448120307	29.7171318085558	3	0
41.7847964510871	11.5270909319445	30.2577055191426	3	0
42.291219978	11.5178410686236	30.7733789093764	3	0
42.7839848402938	11.5127669019382	31.2712179383556	3	0
43.260754307641	11.5915619433767	31.6691923642643	3	0
43.7216554014944	11.8436279941798	31.8780274073145	3	0
44.1475559839807	12.0819957132358	32.0655602707449	3	0
44.5346435792166	12.3042354927552	32.2304080864614	3	0
44.8704409716198	12.5085937707522	32.3618472008676	3	0
45.138055092387	12.6862957200908	32.4517593722963	3	0
45.3282240037923	12.8323943792936	32.4958296244987	3	0
45.4339455580486	12.9375416758158	32.4964038822328	3	0
45.4542060142743	12.993540005486	32.4606660087883	3	0
45.3779054767573	12.9951324900091	32.3827729867481	3	0
45.2006048492075	12.9383425894895	32.262262259718	3	0
44.9269589583783	12.8184811706551	32.1084777877231	3	0
44.5665167618678	12.6305083287811	31.9360084330867	3	0
44.1332796965834	12.3775957434142	31.7556839531692	3	0
43.6445284110851	12.209636856412	31.4348915546731	3	0
43.1197861083551	12.3313208105887	30.7884652977664	3	0
42.5799391034027	12.4665142038697	30.113424899533	3	0
42.0409459243361	12.6144080465249	29.4265378778112	3	0
41.5144804159669	12.7750160968779	28.7394643190891	3	0
41.0078292531648	12.9625166776311	28.0453125755337	3	0
40.5243176088165	13.180513913595	27.3438036952215	3	0
40.0641949719579	13.4327563874761	26.6314385844817	3	0
39.6256795519225	13.7237981782864	25.9018813736361	3	0
39.2059243366971	14.0592239376404	25.1467003990568	3	0
27.1366075036219	53.8404431809034	-26.7038356772814	3	0
20.1734683930609	53.3861520026189	-33.212683609558	3	0
37.509393021873	44.9628379342326	-7.45344491235953	3	0
29.2377144063537	54.1441926777431	-24.9064782713894	3	0
19.3202187630511	19.576890715959	-0.256671952907897	3	0
23.03270564819	68.0831190525571	-45.050413404367	3	0
10.1351464890816	-6.50328265513671	16.6384291442183	3	0
11.305916102027	16.8805560967108	-5.57463999468372	3	0
11.8960385639902	-8.00207514171048	19.8981137057007	3	0
12.3161421395573	-7.05524483409304	19.3713869736503	3	0
12.5991180002662	-7.04853928855856	19.6476572888247	3	0
11.2624871413757	16.8526616436612	-5.59017450228551	3	0
5.01286083741719	-26.7554940770306	31.7683549144478	3	0
4.89984379210342	-23.1344819489434	28.0343257410469	3	0
26.1670276537379	11.1766874618955	14.9903401918424	3	0
16.9116894843443	5.3224315693289	11.5892579150154	3	0
35.6484774619465	-0.980803613908537	36.629281075855	3	0
28.9714604506601	-1.90159437298448	30.8730548236446	3	0
31.8315725383277	-13.7017224508564	45.5332949891841	3	0
34.7946418999291	7.40900485098114	27.385637048948	3	0
40.3618494753518	4.68400512574962	35.6778443496022	3	0
44.7880171399223	8.47725927572879	36.3107578641935	3	0
48.3847001741416	20.3803565792056	28.004343594936	3	0
51.4813664728387	7.71168053384918	43.7696859389896	3	0
54.7783360543355	3.9479988890488	50.8303371652867	3	0
55.7785168882749	31.4499989179915	24.3285179702834	3	0
55.9891388612762	2.41996636624028	53.569172495036	3	0
53.0596646300497	2.55764869467231	50.5020159353774	3	0
52.0222021695694	32.986940709755	19.0352614598144	3	0
50.2601428564827	12.4410708183446	37.8190720381381	3	0
49.1969913830788	2.97443919447658	46.2225521886023	3	0
49.7299357300861	-1.10175402119223	50.8316897512784	3	0
41.1905841172226	-1.66491149284298	42.8554956100655	3	0
41.7642706473537	30.8005904859015	10.9636801614522	3	0
42.4185611475714	30.8879835620252	11.5305775855462	3	0
43.0683309934433	4.99111574355689	38.0772152498865	3	0
43.7083720517624	1.53365081949601	42.1747212322664	3	0
44.3401484726625	-8.32247523042302	52.6626237030855	3	0
44.9582989230555	-20.3823060835771	65.3406050066325	3	0
45.5590687890956	-17.0443506054987	62.6034193945943	3	0
46.1526726145842	1.07403378364193	45.0786388309423	3	0
46.72513442673	-1.58309435776345	48.3082287844935	3	0
47.2662410482006	-1.42276521781569	48.6890062660163	3	0
47.7842517674977	-2.13382705468333	49.918078822181	3	0
48.2724907368783	-1.44953384353583	49.7220245804141	3	0
48.7159087842543	-1.78448353635792	50.5003923206122	3	0
49.1076362665323	30.8543743134698	18.2532619530625	3	0
49.4400175199675	32.8966368588837	16.5433806610838	3	0
49.6904828124574	4.501957737613	45.1885250748444	3	0
49.8480082402142	-3.91648569528926	53.7644939355035	3	0
49.9117867407374	-4.43579939179076	54.3475861325282	3	0
49.8699138268755	-1.70118216279881	51.5710959896743	3	0
49.7221540653964	-2.13430779109324	51.8564618564896	3	0
49.4797853416388	16.6350576919255	32.8447276497133	3	0
49.1601527475272	23.9279149665648	25.2322377809624	3	0
48.7851102152127	1.61942861191314	47.1656816032996	3	0
48.3784948775745	2.35970451571308	46.0187903618614	3	0
47.9631558344443	-11.4682136457213	59.4313694801656	3	0
47.5582633376887	-20.6224170700543	68.180680407743	3	0
47.1775508341864	-17.1603773832091	64.3379282173955	3	0
46.8288071106495	-0.888249508402183	47.7170566190517	3	0
79.034028459163	6.24096311011995	72.793065349043	3	0
38.2998290781749	-0.304383255863578	38.6042123340385	3	0
38.2090718043997	-1.45393668115928	39.663008485559	3	0
38.1531213500366	-1.40971356941889	39.5628349194555	3	0
38.1280696779417	17.6717367773577	20.456332900584	3	0
38.133755760947	-6.05033629512746	44.1840920560744	3	0
38.1865010329676	-19.4248025739854	57.611303606953	3	0
38.2921190642612	-36.1522511498159	74.4443702140771	3	0
38.4353918985521	-21.0686083534655	59.5040002520176	3	0
38.5995447571627	-1.06400991134779	39.6635546685105	3	0
38.799484275186	-1.04404360552964	39.8435278807156	3	0
39.0383248512984	19.8755220652698	19.1628027860287	3	0
39.2911128703074	18.7891080155708	20.5020048547367	3	0
39.5549327652611	5.24557268789105	34.30936007737	3	0
39.8275904397578	-1.90381104304602	41.7314014828039	3	0
40.1074728461597	-23.652483442132	63.7599562882917	3	0
40.3934328529165	22.0245581085898	18.3688747443267	3	0
40.686038505768	-2.54331067275019	43.2293491785182	3	0
40.986244852576	-9.33612462738185	50.3223694799579	3	0
41.2909946417852	-1.2697098880688	42.560704529854	3	0
41.6002187338853	-38.5578354878	80.1580542216853	3	0
41.9161501457034	-3.53999618473888	45.4561463304423	3	0
42.2428161741664	-1.76349975627021	44.0063159304366	3	0
42.5807220110123	-0.192187764154752	42.7729097751671	3	0
42.9304258080076	-0.622179124412737	43.5526049324204	3	0
43.2925897013548	-1.32078828771083	44.6133779890656	3	0
43.6679752246881	19.4467991543431	24.221176070345	3	0
44.0574418250902	-6.24660994912683	50.3040517742171	3	0
44.4619482036374	-24.3644298625048	68.8263780661423	3	0
44.8825563228959	-3.69413191480667	48.5766882377026	3	0
45.3204380345515	-43.2314651232278	88.5519031577794	3	0
45.7768843865798	18.4157425148756	27.3611418717043	3	0
46.2533177764632	-14.2546521279094	60.5079699043726	3	0
46.7513072305671	1.6732528071011	45.0780544234661	3	0
47.2725872158393	15.8804107878339	31.3921764280054	3	0
47.8190805351422	-11.9295722356476	59.7486527707899	3	0
48.3929260292408	-27.3803918440694	75.7733178733102	3	0
48.996512015148	-38.1674527259438	87.1639647410918	3	0
49.6325166411552	-47.1226676087884	96.7551842499437	3	0
50.3039566417604	-1.20373388074098	51.5076905225014	3	0
51.0142463353634	-1.32287481424999	52.3371211496134	3	0
51.801937168582	8.49361309372612	43.3083240748558	3	0
52.6410488863067	-15.1347567964597	67.7758056827663	3	0
53.5271839917917	18.6925719854823	34.8346120063094	3	0
54.4658050482153	21.3698477048939	33.0959573433215	3	0
55.4632418178666	18.480931473603	36.9823103442637	3	0
56.5268678559488	18.3641955582931	38.1626722976558	3	0
57.6653154026802	18.2409780990734	39.4243373036068	3	0
58.888731213893	18.79364936386	40.0950818500329	3	0
60.2090671031555	19.4141602023867	40.7949069007688	3	0
61.6403749932042	20.0764598233006	41.5639151699036	3	0
17.7701445832745	33.4027309022806	-15.632586319006	3	0
27.1162362175148	46.2998928967182	-19.1836566792034	3	0
19.0453878372523	49.7763683533562	-30.7309805161038	3	0
16.2357846707724	5.62167464335622	10.6141100274162	3	0
19.8669044656719	4.89322893157387	14.973675534098	3	0
20.5846054902769	6.10218223959683	14.4824232506801	3	0
21.6549727029324	17.6699769630036	3.98499573992873	3	0
23.3754715923811	20.9343068579266	2.44116473445456	3	0
46.9403859013432	17.9866840836095	28.9537018177337	3	0
49.8758198266894	3.42323692619444	46.452582900495	3	0
53.2410653058784	-16.6989423317063	69.9400076375847	3	0
56.5992806867162	19.3388695203455	37.2604111663707	3	0
56.6733309608875	9.28392811031701	47.3894028505705	3	0
54.8863519069098	10.5801112869906	44.3062406199192	3	0
53.85718741112	14.5036520915834	39.3535353195367	3	0
54.5480708553727	-1.02843191239235	55.576502767765	3	0
56.1052989565531	9.89466715404316	46.2106318025099	3	0
57.1428541181617	42.9165661979507	14.226287920211	3	0
51.8781748963777	1.09693646561895	50.7812384307587	3	0
48.6223918087228	-7.54950183452832	56.1718936432511	3	0
48.6782709372274	8.71371637729816	39.9645545599292	3	0
40.9333279014559	-37.0855936642718	78.0189215657277	3	0
41.7721979295095	-42.9760124615544	84.7482103910639	3	0
42.5938893182961	-61.0304534259269	103.624342744223	3	0
43.3823061299757	-54.3542749963836	97.7365811263593	3	0
44.1144279583975	-67.3391031868159	111.453531145213	3	0
44.7673215728755	0.0532087602924205	44.7141128125831	3	0
45.3219073309343	-4.54825065941241	49.8701579903467	3	0
45.7607090635113	-38.2114114891835	83.9721205526949	3	0
46.0689031637975	-33.433322627331	79.5022257911285	3	0
46.2364755889945	-69.7325029094975	115.968978498492	3	0
46.2602777444063	-55.7785839552799	102.038861699686	3	0
46.1453501270358	28.966948694271	17.1784014327648	3	0
45.904983570093	32.3786197508705	13.5263638192224	3	0
45.5588664930063	6.71179499360692	38.8470714993994	3	0
45.124987131763	-1.76181796334948	46.8868050951124	3	0
44.6210960676249	-1.17832551493929	45.7994215825642	3	0
44.0662527816524	-5.46447292883706	49.5307257104894	3	0
43.4786509122745	-14.1929645971231	57.6716155093976	3	0
42.8740589037507	-23.1735111951805	66.0475700989312	3	0
42.2649448898726	-67.2848915244805	109.549836414353	3	0
41.6602964287958	-8.87152038479332	50.5318168135891	3	0
41.0659694916251	-45.931756713655	86.9977262052801	3	0
40.4853291420406	-44.471396473379	84.9567256154197	3	0
39.9199660766737	-66.4946383627817	106.414604439455	3	0
39.3703443483618	-61.2352561569885	100.60560050535	3	0
38.836312356744	-73.6749920512074	112.511304407951	3	0
38.3174664804408	-68.4860763298693	106.80354281031	3	0
37.8133885851148	-11.5581310361362	49.371519621251	3	0
37.3237901548096	-43.6586609415568	80.9824510963664	3	0
36.8485951387041	-51.7409874388786	88.5895825775827	3	0
36.3879876407721	-63.2559391820091	99.6439268227812	3	0
35.9424435779253	23.6788675692732	12.2635760086521	3	0
35.5127594474642	25.0849301711726	10.4278292762916	3	0
35.100606892474	3.07805398285826	32.0225529096157	3	0
67.1478577761258	-3.76808304810992	70.9159408242357	3	0
34.7345546446677	-20.8603844170177	55.5949390616854	3	0
32.8226608557098	-14.9969161242898	47.8195769799996	3	0
34.7650150266806	-45.6352179015064	80.4002329281871	3	0
36.3327258723903	-49.0117656747927	85.344491547183	3	0
38.5130964612679	-54.4942155100807	93.0073119713486	3	0
40.9595808362168	-6.78633400769499	47.7459148439118	3	0
42.1416582832056	-15.1045175910051	57.2461758742107	3	0
37.5215602280515	-36.0681360894562	73.5896963175076	3	0
43.266307006612	-33.7652685316975	77.0315755383095	3	0
44.7017268846985	-64.8402749396479	109.542001824346	3	0
38.5024438638971	-1.45608443750023	39.9585283013973	3	0
38.7759161584832	-11.080046989561	49.8559631480441	3	0
46.9830095997734	-14.3072322436806	61.290241843454	3	0
39.3693269499443	34.9313650668475	4.4379618830968	3	0
39.6356095109412	35.2688207026784	4.36678880826272	3	0
54.3617557095175	12.2173179162195	42.144437793298	3	0
52.0230836023376	1.33817219269728	50.6849114096403	3	0
40.7871685835719	-21.6000232722665	62.3871918558384	3	0
41.0201778429675	-29.0455017527918	70.0656795957593	3	0
41.2803951938118	-44.6316291593086	85.9120243531204	3	0
41.5408388195414	-42.8823353152934	84.4231741348348	3	0
41.8141550100246	-84.3815323783065	126.195687388331	3	0
42.0832935223956	-53.0377622152321	95.1210557376277	3	0
42.34707036412	-2.15290690909555	44.4999772732155	3	0
42.6655266862194	-35.8691796306036	78.534706316823	3	0
42.9971851082241	-57.312929728149	100.310114836373	3	0
43.3428391919599	-51.8212645496627	95.1641037416226	3	0
43.7033367694963	-45.5637509242592	89.2670876937555	3	0
44.0795879296722	-1.67258408780374	45.752172017476	3	0
44.472573975313	-57.2737416831728	101.746315658486	3	0
44.8833575501178	-1.47662319436906	46.3599807444869	3	0
45.3130941723212	38.819298553276	6.49379561904524	3	0
45.763045459867	39.1872512817427	6.57579417812435	3	0
46.1585512976325	13.1677423257779	32.9908089718547	3	0
46.4838051152492	1.9825453043377	44.5012598109115	3	0
46.7761423112497	2.7918632617861	43.9842790494636	3	0
47.1034294268309	-9.66811533415562	56.7715447609865	3	0
47.3852325632488	-1.46934450841605	48.8545770716648	3	0
47.7231690533658	-35.6810652608566	83.4042343142224	3	0
48.0740204585266	-31.5407400953735	79.6147605539001	3	0
48.441030499522	-47.2046665325725	95.6456970320946	3	0
48.8275015879006	-49.3627563469895	98.19025793489	3	0
49.2367714453582	-66.4525981440761	115.689369589434	3	0
49.6721888409473	-56.5562285930702	106.228417434017	3	0
50.0838707365203	-1.77302750143901	51.8568982379593	3	0
50.5785901118356	-36.494112545263	87.0727026570986	3	0
51.110831836108	-32.4408460325898	83.5516778686978	3	0
51.6842642584071	-47.119723643801	98.8039879022081	3	0
52.3024211786389	-51.7062095727894	104.008630751428	3	0
52.9685537770883	-67.0762632418602	120.044817018949	3	0
53.6614665547805	-59.9102707544211	113.571737309202	3	0
54.4389667061452	42.7959157479651	11.6430509581801	3	0
55.2753790235416	43.2722666767422	12.0031123467994	3	0
56.315993179931	17.135565995783	39.180427184148	3	0
57.5994176933366	3.29871696712046	54.3007007262161	3	0
59.00001046487	3.72487012509172	55.2751403397782	3	0
60.547081296828	-6.42170175148531	66.9687830483133	3	0
62.2667685466955	-30.3072044786674	92.5739730253628	3	0
10.4580476103162	-3.081433712383	13.5394813226992	3	0
25.6668520149722	-16.8005865145215	42.4674385294937	3	0
25.6919049497426	-29.8207818506589	55.5126868004015	3	0
24.9855833379335	-12.3073853069845	37.292968644918	3	0
24.4835091226893	-18.2821082250404	42.7656173477296	3	0
25.4685206477688	-51.7195949983014	77.1881156460703	3	0
25.9275937523182	-1.53699383623857	27.4645875885568	3	0
26.3257520751898	-4.79218453564662	31.1179366108364	3	0
26.1376559788835	-52.2461831594151	78.3838391382986	3	0
26.5586294657337	0.885029517677396	25.6735999480563	3	0
27.5820573576551	-40.050543545705	67.6326009033601	3	0
30.1046505368386	-13.1154886940377	43.2201392308763	3	0
32.8851356525434	2.68585787034509	30.1992777821983	3	0
35.4602418461496	9.38052801383634	26.0797138323133	3	0
37.1050016613815	10.5686960007527	26.5363056606288	3	0
38.7507892403293	4.22282723674045	34.5279620035888	3	0
40.1199080108613	-28.0356851261979	68.1555931370593	3	0
42.6646655922017	8.12744278411766	34.537222808084	3	0
44.5803668221168	0.197347213828882	44.3830196082879	3	0
46.5465800066618	2.83384674950103	43.7127332571608	3	0
48.8982975864795	5.79222490091327	43.1060726855662	3	0
51.8576460136632	19.8352656369452	32.0223803767179	3	0
50.259782513921	-3.9152665475773	54.1750490614983	3	0
51.1846915040331	1.87118535917904	49.3135061448541	3	0
51.6587039038199	2.65486988270224	49.0038340211177	3	0
52.2018311647219	20.2393347276779	31.962496437044	3	0
50.171872117454	2.98864079747504	47.183231319979	3	0
50.2721967589791	-21.9861136001653	72.2583103591443	3	0
50.8283653794935	-21.7267734455329	72.5551388250264	3	0
41.0879246416951	-45.4480307536881	86.5359553953832	3	0
42.0128765253478	-42.7439441757287	84.7568207010766	3	0
42.9965897053293	-4.44937272357871	47.445962428908	3	0
44.0458189600558	12.2682474055499	31.7775715545059	3	0
45.1674381854457	-17.85537585857	63.0228140440156	3	0
46.3614225102703	-45.2380430731378	91.5994655834081	3	0
47.6378768829741	-21.7964424403249	69.434319323299	3	0
49.0084144807254	-38.4301514933023	87.4385659740276	3	0
50.457763944894	-45.2339827019092	95.6917466468033	3	0
51.9789051556063	-1.08497080412646	53.0638759597327	3	0
53.5501416223023	-1.99028821668296	55.5404298389853	3	0
55.1183740687262	7.17823626458783	47.9401378041384	3	0
56.5991804311189	14.2802668090296	42.3189136220892	3	0
57.8427453508187	1.04338163980035	56.7993637110184	3	0
58.6298341757639	14.962753279027	43.6670808967369	3	0
51.9632824577596	-4.67580965863192	56.6390921163915	3	0
53.664184535885	-4.17544007297351	57.8396246088585	3	0
52.2035908397172	1.72888593134542	50.4747049083718	3	0
53.2605683770191	-13.0416588767567	66.3022272537758	3	0
51.2899923107114	-15.1440136198315	66.4340059305429	3	0
52.8508539064695	17.2471682589047	35.6036856475648	3	0
54.1313233241178	6.5122120052956	47.6191113188222	3	0
55.4197065703787	-21.2498970487552	76.669603619134	3	0
55.5668164247795	-29.8274550845026	85.3942715092822	3	0
52.466496752763	10.3691754284024	42.0973213243606	3	0
51.6323041173911	-26.9494562357588	78.58176035315	3	0
49.8551557217772	-30.090477766859	79.9456334886361	3	0
50.2978403905008	31.6985339044126	18.5993064860882	3	0
40.3520004593661	20.5357419541366	19.8162585052295	3	0
41.1534437327216	-12.9470902158624	54.100533948584	3	0
41.9591904173998	-1.35649178138281	43.3156821987827	3	0
42.748090035747	-29.9452866295942	72.6933766653412	3	0
43.504255393341	-27.9266028681722	71.4308582615132	3	0
44.2135349022498	-41.753177624191	85.9667125264408	3	0
44.8645945028833	-38.6714950667554	83.5360895696386	3	0
45.461805251116	-3.42606038485574	48.8878656359718	3	0
45.9889925562043	-0.80242973962113	46.7914222958254	3	0
46.4211512723819	-6.73773479537316	53.158886067755	3	0
46.7627533835885	-1.29310698133063	48.0558603649191	3	0
47.0002559081721	-12.8181942757944	59.8184501839666	3	0
47.1293856264985	-15.1694592287184	62.2988448552169	3	0
47.1691529831128	-38.0324980133637	85.2016509964765	3	0
47.3255694689366	0.106938247338417	47.2186312215982	3	0
47.3766600270228	-0.151474653430469	47.5281346804533	3	0
47.3291510102656	-0.423996471056564	47.7531474813221	3	0
47.1824145803009	0.021563707933621	47.1608508723673	3	0
46.9439417820942	5.79672896232428	41.1472128197699	3	0
46.6309592779893	3.43511273152846	43.1958465464609	3	0
46.2631269411543	-10.5511297466382	56.8142566877925	3	0
45.8600269101937	-9.77964232387601	55.6396692340697	3	0
45.4389229002325	2.27580776612632	43.1631151341062	3	0
45.0133077406566	2.67665439110229	42.3366533495543	3	0
44.5924363155384	3.02982289553142	41.5626134200069	3	0
44.1817020571457	3.3209160441667	40.860786012979	3	0
43.7835143186693	3.5365339947246	40.2469803239447	3	0
43.3983155643589	3.66652245491786	39.731793109441	3	0
44.2303606303325	-21.0158882667518	65.2462488970843	3	0
47.90112391366	-4.36262612942688	52.2637500430869	3	0
48.7548767549441	-55.3701019424722	104.124978697416	3	0
52.0747663339604	-52.9111192051651	104.985885539125	3	0
54.3077117268701	-28.7810561073936	83.0887678342637	3	0
57.4660476124039	-11.2712909138342	68.7373385262382	3	0
55.8209653584572	-10.2617009300178	66.082666288475	3	0
54.1093349020862	13.8888149968914	40.2205199051949	3	0
53.4112475459754	-60.8427209373952	114.253968483371	3	0
53.5564718617832	27.6958854886166	25.8605863731666	3	0
53.4038565273877	-55.0305356017047	108.434392129092	3	0
53.3170965475817	27.5542084427042	25.7628881048775	3	0
53.2506023947654	2.84546179078005	50.4051406039854	3	0
53.2977248839459	-6.9439008621036	60.2416257460495	3	0
53.2349913507707	1.37540061056396	51.8595907402068	3	0
51.4374874062638	-28.3522127130997	79.7897001193635	3	0
51.1665230831318	1.14739830659755	50.0191247765342	3	0
50.975295869322	-29.8590351804195	80.8343310497415	3	0
50.3044230454521	-39.276626040806	89.5810490862581	3	0
50.6506121961464	2.25007978466056	48.4005324114858	3	0
48.8147850189182	3.79455700752902	45.0202280113892	3	0
49.0139063404353	21.1365716178774	27.8773347225579	3	0
49.0923400933675	25.3785244815434	23.7138156118241	3	0
50.5162941400932	-3.59950983383949	54.1158039739327	3	0
50.4238642515091	-35.2352773854694	85.6591416369785	3	0
41.274951110392	-8.10702640646313	49.3819775168551	3	0
41.9802806594322	-33.2540858595972	75.2343665190294	3	0
42.7137518973807	-41.431073257513	84.1448251548937	3	0
43.4789979719437	-50.6713564822817	94.1503544542254	3	0
44.2790168655305	-1.78282477381426	46.0618416393447	3	0
45.1157806166277	-3.34528548250885	48.4610660991365	3	0
46.0002659730687	-1.55861715792788	47.5588831309966	3	0
46.9300389699776	-6.29574221308693	53.2257811830645	3	0
47.912950603002	-36.9061580414526	84.8191086444546	3	0
48.9570322657586	-48.0860259443025	97.0430582100611	3	0
50.0699766950558	-50.2143825134456	100.284359208501	3	0
51.2597245158878	-2.18228696872854	53.4420114846163	3	0
52.5321421211726	-2.20926804399392	54.7414101651665	3	0
53.9131622387223	-2.10360154208269	56.0167637808049	3	0
55.4083056093171	7.980136907962	47.4281687013551	3	0
57.0432277802808	19.2212254166264	37.8220023636544	3	0
58.843798793312	21.0693668454918	37.7744319478202	3	0
60.8319134347825	-16.3656065486355	77.1975199834179	3	0
20.5763722509094	5.98517046318636	14.591201787723	3	0
30.1350710715059	6.38002925798492	23.755041813521	3	0
35.6079771678617	6.30138205184631	29.3065951160154	3	0
39.6288207884526	5.44588326365553	34.1829375247971	3	0
41.3476512103931	5.42325326467051	35.9243979457226	3	0
42.3963782436331	5.05689208358512	37.339486160048	3	0
44.2350553215838	5.32356840871756	38.9114869128662	3	0
45.6414897733197	5.82833488103353	39.8131548922861	3	0
46.8345390939983	10.3564220450157	36.4781170489826	3	0
49.6086909079447	3.93111578594474	45.677575122	3	0
51.7446750935684	7.14247418968481	44.6022009038836	3	0
54.0662240861243	-16.7840819049824	70.8503059911067	3	0
56.8533604238124	2.01169454265701	54.8416658811554	3	0
52.3081120257474	1.08195142308953	51.2261606026579	3	0
53.4517740529744	3.83133943406705	49.6204346189073	3	0
53.2386590653702	-14.6347433156377	67.8734023810079	3	0
51.4484517515412	-22.7728648550405	74.2213166065817	3	0
49.2217247352779	1.62139978765813	47.6003249476197	3	0
49.2775961417738	3.47411093882012	45.8034852029536	3	0
48.3599554415066	-5.31283299568117	53.6727884371878	3	0
49.3692123815281	-3.33266317322827	52.7018755547564	3	0
47.8916176196272	-0.499111875738522	48.3907294953658	3	0
46.579892214893	1.67087569588494	44.9090165190081	3	0
47.0348637213017	3.67349128284276	43.361372438459	3	0
46.1490655487406	-7.36786785968088	53.5169334084214	3	0
46.0589346922792	-38.0699190065793	84.1288536988585	3	0
45.8289738914478	-39.7719460633812	85.600919954829	3	0
44.2899396052367	-9.6830487511501	53.9729883563868	3	0
44.715092487804	7.01934962535763	37.6957428624464	3	0
43.8728243440469	-22.7600857669295	66.6329101109764	3	0
44.5314755161994	-36.7814698830525	81.3129453992519	3	0
44.3845423034227	0.509336830852233	43.8752054725704	3	0
45.4908327438886	7.35147288334628	38.1393598605423	3	0
39.1296768449112	-2.08790861131903	41.2175854562302	3	0
45.731322706461	-21.9599216236012	67.6912443300622	3	0
40.1686069347988	-11.3020946058805	51.4707015406794	3	0
40.5982873674141	-11.7923989418416	52.3906863092556	3	0
41.0369613409314	-30.6227356651595	71.6596970060909	3	0
41.4889098781377	-8.80497108006315	50.2938809582008	3	0
41.9444559275714	-24.9236694368077	66.8681253643792	3	0
42.3981864137912	-1.39152625158073	43.7897126653719	3	0
42.8601652333853	-33.6314980374818	76.4916632708671	3	0
43.3307031261706	-44.8760052224203	88.2067083485909	3	0
43.8066854794972	-1.27049528797764	45.0771807674749	3	0
44.2900982188586	10.8832193020094	33.4068789168491	3	0
44.7852768375881	14.5856057435749	30.1996710940132	3	0
45.2918367301061	17.5584044047948	27.7334323253114	3	0
45.7951245733547	17.8606074612892	27.9345171120654	3	0
46.2885377233751	-13.5682629564911	59.8568006798662	3	0
46.778235172733	-11.3226179086719	58.1008530814048	3	0
47.2635949791667	-21.5002856055001	68.7638805846668	3	0
47.7483606583954	-23.7393571446484	71.4877178030438	3	0
48.2272988365688	-0.215354933075066	48.4426537696438	3	0
48.6876454640737	-0.074651564757688	48.7622970288314	3	0
49.1960630070197	-0.288948422441825	49.4850114294615	3	0
49.7245016683916	0.672901782903112	49.0515998854885	3	0
50.2471811940637	0.276918704464676	49.970262489599	3	0
50.7551649820008	-1.92286598939772	52.6780309713985	3	0
51.2539499758454	-2.91249134282154	54.1664413186669	3	0
51.7322560672148	-1.08549858879805	52.8177546560129	3	0
52.1844817054061	-1.24562866236324	53.4301103677694	3	0
52.6086446142568	-0.921963560466888	53.5306081747237	3	0
52.9997887262128	-1.35558517657763	54.3553739027904	3	0
53.3589968918331	-1.90130794668483	55.2603048385179	3	0
53.6883414935593	2.35461361492339	51.3337278786359	3	0
53.9908727765452	8.91313153105726	45.0777412454879	3	0
54.2705436995344	14.1334552639061	40.1370884356282	3	0
54.5320762641655	-3.87939403799683	58.4114703021624	3	0
54.7832228825651	-13.9185217371252	68.7017446196903	3	0
55.0224597325341	-11.9236394010852	66.9460991336193	3	0
55.2529096780609	-18.1648547144341	73.417764392495	3	0
55.4809190885804	-20.7285337743006	76.2094528628811	3	0
55.7127938348147	-2.91826818379473	58.6310620186094	3	0
32.2724161148012	4.93630541342	27.3361107013812	3	0
38.792205748338	7.60263533463722	31.1895704137008	3	0
43.2553581692553	5.3127049015401	37.9426532677152	3	0
46.1384281216365	5.79219946371472	40.3462286579218	3	0
48.4844453082172	-7.0100598187751	55.4945051269923	3	0
53.2205136850782	4.81075626827773	48.4097574168005	3	0
57.6645421219226	9.20971020291971	48.4548319190029	3	0
59.4381423971095	5.2052467654167	54.2328956316928	3	0
56.6306974206487	5.44093472278734	51.1897626978614	3	0
56.124212761604	5.96732732780398	50.1568854338001	3	0
57.8882869438881	31.9234631905846	25.9648237533035	3	0
57.6233961321186	7.98401934477369	49.6393767873449	3	0
43.1139885335982	17.2528500870191	25.8611384465791	3	0
44.4775431144853	17.7883116041365	26.6892315103488	3	0
45.9449213825616	18.1332208979276	27.811700484634	3	0
47.5270528815778	19.5705550973335	27.9564977842443	3	0
49.2490447651524	22.6022209486137	26.6468238165386	3	0
51.1357773519619	19.0873952973385	32.0483820546235	3	0
53.1977052900838	19.4643569074529	33.733348382631	3	0
55.4474424642065	19.8716870561993	35.5757554080071	3	0
57.8848315039068	20.313497437109	37.5713340667978	3	0
60.4512804990884	20.7937871988967	39.6574933001916	3	0
62.9463671990843	21.3177341898573	41.628633009227	3	0
17.3440171904656	18.921118676169	-1.57710148570333	3	0
41.3063748899751	28.1690803807934	13.1372945091817	3	0
43.5467392077045	30.8199231763469	12.7268160313576	3	0
25.8428713738214	17.4966200710776	8.34625130274373	3	1
28.3493844407628	20.5938253266844	7.75555911407837	3	1
31.1676516542392	15.1303983809578	16.0372532732813	3	1
33.9622419547028	-4.80363843607191	38.7658803907747	3	1
31.290379974562	-30.6305459184362	61.9209258929981	3	1
30.1032933910881	-30.2527823854134	60.3560757765015	3	1
30.1946824675815	27.2372187212072	2.95746374637426	3	1
31.192313396974	-28.7360678040316	59.9283812010056	3	1
29.4758153552923	24.1776025953792	5.29821275991309	3	1
30.7765639579851	-1.89796870096244	32.6745326589476	3	1
30.2495557326544	-29.496848220326	59.7464039529805	3	1
30.3282090577683	-2.61360464143828	32.9418136992066	3	1
29.3233511457809	-9.51853587517854	38.8418870209594	3	1
27.7448578380727	-44.7968621370263	72.541719975099	3	1
26.8315196232382	-27.0471152923721	53.8786349156103	3	1
27.3286290049396	19.5424448829718	7.7861841219678	3	1
25.9694104921684	7.89367892684959	18.0757315653188	3	1
28.2510305391972	-4.72866564331831	32.9796961825155	3	1
26.7670353073711	2.32148016666382	24.4455551407072	3	1
25.4655782802601	11.3633364548439	14.1022418254161	3	1
26.7489423251442	1.83593400096633	24.9130083241779	3	1
24.9864927849755	2.62996716493437	22.3565256200412	3	1
26.5161693519425	9.64943732325209	16.8667320286905	3	1
25.723231994835	-3.73090832084716	29.4541403156822	3	1
25.3156977665214	9.26761044787297	16.0480873186485	3	1
24.3154699923876	12.96556086342	11.3499091289676	3	1
26.8437310856422	-3.02236338960356	29.8660944752457	3	1
25.6811155053929	2.47297962909824	23.2081358762946	3	1
24.6591464197101	10.1599682410914	14.4991781786187	3	1
25.818812138442	9.21304648190497	16.6057656565371	3	1
25.9129038734419	-21.3579488513838	47.2708527248257	3	1
25.7409969295984	-20.4769972724667	46.217994202065	3	1
25.9803755025902	-9.25339865690448	35.2337741594947	3	1
26.1852520299617	6.48790214190629	19.6973498880554	3	1
26.0003379637209	-9.43298715048243	35.4333251142033	3	1
26.576501076209	-35.5944382069659	62.1709392831749	3	1
26.726379514379	6.73223265022959	19.9941468641495	3	1
26.1604377905302	-30.0323497371652	56.1927875276954	3	1
26.2869894807681	8.96683857390792	17.3201509068602	3	1
26.0180194170729	-9.54152729088405	35.559546707957	3	1
26.3418450737061	-19.1550515687558	45.4968966424619	3	1
25.6350759452309	4.41098059831568	21.2240953469152	3	1
24.9315180509471	1.45927859201918	23.4722394589279	3	1
26.4481511410709	1.37123709872618	25.0769140423447	3	1
24.9961202276827	2.54435274805753	22.4517674796252	3	1
27.2339718031693	3.09777977576058	24.1361920274087	3	1
26.1465740312391	3.32700109308509	22.819572938154	3	1
27.8581768539259	4.6416478599223	23.2165289940036	3	1
28.753646043312	-43.158352252859	71.911998296171	3	1
30.5574541018707	-56.3390756390775	86.8965297409481	3	1
32.3224714585898	-10.7271233801671	43.0495948387569	3	1
33.4147475558626	-50.501206639155	83.9159541950176	3	1
34.580269655041	24.0104298961312	10.5698397589098	3	1
35.5112116709408	-4.05675616305398	39.5679678339948	3	1
36.1900307678407	18.1527464233217	18.037284344519	3	1
36.10851897458	-28.1024510531566	64.2109700277366	3	1
36.8284706725527	2.43278351298915	34.3956871595636	3	1
36.211855408163	-20.489151411235	56.7010068193981	3	1
36.827702373937	2.27117528989941	34.5565270840376	3	1
35.5918979655421	24.9342880111908	10.6576099543513	3	1
38.0412113205645	1.57355099957927	36.4676603209853	3	1
37.5275229444241	-18.3921757324394	55.9196986768635	3	1
36.9534478143983	18.481266554836	18.4721812595623	3	1
37.4625352174273	-23.1909473102944	60.6534825277218	3	1
37.5441774518661	2.04940913479186	35.4947683170743	3	1
38.0234472001326	-53.9736776668434	91.997124866976	3	1
38.9010570375701	-23.5328476605226	62.4339046980927	3	1
38.1066781492298	-25.9275683045685	64.0342464537983	3	1
39.347656780601	1.10679940496084	38.2408573756402	3	1
38.6587532618824	39.4261120747073	-0.767358812824921	3	1
40.629197515485	17.5458793206191	23.0833181948659	3	1
40.793700959808	0.323990379801317	40.4697105800067	3	1
40.5970048432723	-2.25495332320405	42.8519581664764	3	1
37.694381164415	-16.623937170722	54.3183183351369	3	1
42.1234267133758	-13.2028554030898	55.3262821164656	3	1
38.9580037352885	-2.58526128084065	41.5432650161291	3	1
40.2377181384226	3.68322992023246	36.5544882181901	3	1
40.7848100370913	-0.460303857894372	41.2451138949857	3	1
41.3535946492778	-45.3199288912184	86.6735235404962	3	1
41.9462116048886	-46.52652486776	88.4727364726486	3	1
42.5641060392513	-1.79559987081689	44.3597059100682	3	1
43.2066901666542	-70.852226561238	114.058916727892	3	1
43.8649277839912	-0.801403626971572	44.6663314109628	3	1
44.5444716582535	3.35016745754194	41.1943042007115	3	1
45.2437582869949	-36.864869538925	82.1086278259199	3	1
45.9609964694452	-41.6412774017715	87.6022738712167	3	1
46.6859173635823	-48.6827410817844	95.3686584453668	3	1
47.4370245145489	30.4339552162566	17.0030692982922	3	1
48.2065352377981	2.40867761377924	45.7978576240188	3	1
48.9977423408943	-20.9521856422335	69.9499279831278	3	1
49.8119583034787	18.9759098388867	30.836048464592	3	1
50.6639952130662	21.7588367293074	28.9051584837588	3	1
51.5709406279412	-10.9488725532145	62.5198131811557	3	1
52.5395691329851	-23.1180675967033	75.6576367296884	3	1
53.5779603104597	-25.6531807740315	79.2311410844912	3	1
54.6784040757418	-1.30828764402132	55.9866917197631	3	1
55.8551618227845	-42.9450845521907	98.8002463749753	3	1
57.1317081327829	-40.0765894430826	97.2082975758655	3	1
58.5269135595921	20.7866442558408	37.7402693037513	3	1
60.0630400632245	0.996503230961558	59.066536832263	3	1
40.6240090010409	2.93354850424236	37.6904604967986	3	1
42.3102526753074	-18.731750633261	61.0420033085684	3	1
38.5850305225762	3.11261105840715	35.472419464169	3	1
36.6514076810789	11.9015976633206	24.7498100177583	3	1
34.3705297258783	16.8640112792947	17.5065184465836	3	1
31.1359584883967	3.0067731797556	28.1291853086411	3	1
30.1598609770276	4.39664811139335	25.7632128656343	3	1
29.974672476292	5.50639964867121	24.4682728276208	3	1
28.5515533888075	7.63641884711033	20.9151345416972	3	1
26.3321004577632	8.30050801292268	18.0315924448405	3	1
26.0710320374869	9.48521850336246	16.5858135341244	3	1
25.673816101404	10.6654854952087	15.0083306061953	3	1
25.9179971478359	11.7157044307402	14.2022927170957	3	1
26.9394870970747	13.2024138034267	13.737073293648	3	1
25.289308304203	25.0486793167866	0.240628987416434	3	1
25.1413847658071	8.24574617303048	16.8956385927766	3	1
33.0167119787081	-0.957697437268472	33.9744094159765	3	1
25.6191472069978	-31.6360487329586	57.2551959399564	3	1
25.2750778313695	1.76594661364486	23.5091312177246	3	1
25.5301921853304	-4.75867580930551	30.2888679946359	3	1
26.4397024556881	12.4871066323124	13.9525958233757	3	1
26.4588034500024	-8.02577353435478	34.4845769843571	3	1
27.3500518136305	-12.5970572387454	39.9471090523759	3	1
27.6508262478796	2.41951287201638	25.2313133758632	3	1
30.1228475471059	-2.02105250057476	32.1439000476807	3	1
31.7335833036191	-17.5633441419263	49.2969274455455	3	1
33.5120216094717	-31.5101051013438	65.0221267108156	3	1
35.1338412155436	23.5002756460148	11.6335655695289	3	1
36.8490237594314	-3.81814583835194	40.6671695977833	3	1
38.0971455748747	-12.2144549819263	50.3116005568009	3	1
39.3254440744653	1.77331361239176	37.5521304620735	3	1
38.6120412160007	2.43393761301758	36.1781036029831	3	1
39.4983992064076	1.55100754570549	37.9473916607021	3	1
40.4517822097517	2.11166845755952	38.3401137521922	3	1
40.6010206969413	39.1057483660095	1.49527233093181	3	1
41.4528591398672	2.65082414701732	38.8020349928498	3	1
52.420497013662	-2.02434557933209	54.4448425929941	3	1
45.4537068146965	1.91580056026538	43.5379062544311	3	1
43.7088570105763	0.339644448449582	43.3692125621267	3	1
43.82795933108	0.179498191925622	43.6484611391544	3	1
43.6236609880108	32.7017057932795	10.9219551947313	3	1
45.5606813880134	38.8768545949248	6.68382679308859	3	1
45.0789001148111	5.66708071413321	39.4118194006779	3	1
46.3248409143274	-8.32992476953574	54.6547656838631	3	1
45.8945337024416	-5.49878970389557	51.3933234063372	3	1
45.9116693458803	-18.5436011673075	64.4552705131878	3	1
39.9087818009004	-1.65718246491567	41.5659642658161	3	1
40.4277246745006	-0.815082628659699	41.2428073031602	3	1
40.968749761559	-2.45606036507859	43.4248101266375	3	1
41.5217646256323	-0.255656044753938	41.7774206703862	3	1
42.0844485288211	-0.868779553677085	42.9532280824981	3	1
42.6644819470357	-0.64039888122628	43.304880828262	3	1
43.2696123172393	-2.04019288668862	45.3098052039279	3	1
43.9053764199076	-1.5102832437199	45.4156596636275	3	1
44.5715401417609	22.8797698824813	21.6917702592796	3	1
45.2629708359177	28.0783442719795	17.1846265639382	3	1
45.9871456507457	-1.85134342654469	47.8384890772904	3	1
46.7486595927825	-19.8263638858918	66.5750234786743	3	1
47.6003192387338	33.7980624062211	13.8022568325127	3	1
48.5953809339362	34.5432102410515	14.0521706928847	3	1
49.6691779077699	-5.41079138629696	55.0799692940669	3	1
50.8373590432569	-4.21134769422825	55.0487067374852	3	1
52.1109886599626	-21.9030466092017	74.0140352691643	3	1
53.5083848432637	-22.574939813838	76.0833246571018	3	1
55.0455587847478	-43.0395829646627	98.0851417494105	3	1
56.7561652618314	-37.8002128820047	94.5563781438361	3	1
58.6624497179451	-2.97872004159022	61.6411697595353	3	1
60.8324232632516	-0.741721328407597	61.5741445916592	3	1
63.3538943567692	-1.84245496569453	65.1963493224637	3	1
32.4851536388927	-3.3980381398683	35.883191778761	3	1
34.7312356088786	39.533292690152	-4.8020570812734	3	1
37.0839252996074	11.4800328618496	25.6038924377578	3	1
37.501389371825	-16.4110677381336	53.9124571099586	3	1
32.5349414216017	-0.31764776046353	32.8525891820652	3	1
33.2326455968894	-43.8894966000532	77.1221421969425	3	1
33.9599472873486	42.5665943527388	-8.60664706539017	3	1
36.2972132495173	44.0273563880712	-7.73014313855396	3	1
38.0434109093529	-4.25180797428039	42.2952188836332	3	1
38.4577919592257	3.41181242925724	35.0459795299684	3	1
39.18786191699	4.33713207502261	34.8507298419674	3	1
39.8748116609646	-15.3043220535371	55.1791337145017	3	1
40.4877286187501	-20.5075118628304	60.9952404815805	3	1
40.9780073112776	11.9690161777745	29.008991133503	3	1
48.3224666699693	12.6607726085428	35.6616940614265	3	1
49.6483347106497	-3.47916438184882	53.1274990924985	3	1
50.991969442816	-25.8586189730353	76.8505884158514	3	1
52.329421486705	-29.2623017672216	81.5917232539265	3	1
53.6300273937491	-31.85891976046	85.4889471542091	3	1
54.8726205050244	-0.494343953141081	55.3669644581654	3	1
16.2326966993065	58.5757170921569	-42.3430203928504	3	1
30.3493740032553	33.7669549441806	-3.41758094092526	3	1
37.4537018128418	17.5444355143282	19.9092662985136	3	1
42.8012206279257	32.3890183493845	10.4122022785412	3	1
47.2468211549474	27.6101622788315	19.6366588761159	3	1
51.3781180565392	22.284206619409	29.0939114371302	3	1
55.7836203401862	-5.63134272768991	61.4149630678761	3	1
58.6331094145592	4.91886405942911	53.7142453551301	3	1
56.0863211064158	-45.136285559983	101.222606666399	3	1
53.6808952271781	31.6456790915729	22.0352161356052	3	1
52.2269198644006	-36.5320793202915	88.7589991846922	3	1
51.9419652038028	-34.1899188296158	86.1318840334185	3	1
48.6850369937909	-17.6589194005591	66.34395639435	3	1
45.3894846699681	-10.3852256233497	55.7747102933178	3	1
43.6309787222965	0.702649198853915	42.9283295234426	3	1
43.3640669407637	1.39008089764871	41.973986043115	3	1
42.6213388387555	0.271208789336067	42.3501300494194	3	1
41.9336658094289	0.988789286318619	40.9448765231102	3	1
39.4835263526743	-1.41278813279681	40.8963144854711	3	1
39.8887319740058	-1.94659789475883	41.8353298687646	3	1
40.2512170689458	0.288299673837079	39.9629173951087	3	1
40.5629939969256	-3.77050376089135	44.333497757817	3	1
40.8209934282275	-0.981342244640106	41.8023356728676	3	1
41.0242612578512	22.3595156546994	18.6647456031518	3	1
41.1649241719576	25.7114965370714	15.4534276348862	3	1
41.1649781344589	24.4518874210231	16.7130907134358	3	1
40.9752520155808	6.98034868776717	33.9949033278137	3	1
40.7072517873044	-12.7331014859573	53.4403532732617	3	1
40.3719673190201	-32.0103898289259	72.382357147946	3	1
39.982174003269	-27.4213275678606	67.4035015711296	3	1
39.5512833741604	-25.9116559558306	65.462939329991	3	1
39.0922276989356	-21.8305907002597	60.9228183991953	3	1
38.6165683791528	-1.45486247033532	40.0714308494881	3	1
38.133942898708	-0.885652725260616	39.0195956239686	3	1
37.6518703184107	-1.43396073848229	39.085831056893	3	1
37.1758561005109	0.478338845406283	36.6975172551047	3	1
36.7096944589499	-2.66738842157205	39.3770828805219	3	1
36.2558621165021	-1.1522707592774	37.4081328757795	3	1
35.8159191435182	-2.4548272353106	38.2707463788288	3	1
35.3908644167528	-0.330859229356647	35.7217236461095	3	1
34.9814227942051	-3.04096790896663	38.0223907031718	3	1
34.5882622708167	-1.67904634858643	36.2673086194031	3	1
34.2121513039717	-2.14399390182015	36.3561452057918	3	1
33.8540711419777	9.3095367243795	24.5445344175982	3	1
33.5152980750128	14.9257594375204	18.5895386374924	3	1
33.2507682727999	16.2838029564472	16.9669653163527	3	1
33.0837045719559	-19.0940165307474	52.1777211027032	3	1
32.9342836762165	-34.5513514310262	67.4856351072428	3	1
32.8054840714601	-28.9883528437586	61.7938369152187	3	1
32.7008862446346	-26.6825615364637	59.3834477810983	3	1
32.6247812417334	-35.7151738327518	68.3399550744851	3	1
32.5712085282926	-2.99059116018293	35.5617996884756	3	1
32.5281713138395	-0.34168576727583	32.8698570811154	3	1
32.4944467570064	-2.04882281868614	34.5432695756926	3	1
32.479698352649	-1.39712719047353	33.8768255431226	3	1
32.4863954310119	-2.23193720306337	34.7183326340752	3	1
32.501222267849	-1.17399886432766	33.6752211321767	3	1
32.5343264020388	21.2280886036385	11.3062377984003	3	1
26.7822526809487	9.60538740203357	17.1768652789152	3	1
32.6627294226293	-20.557741027784	53.2204704504133	3	1
32.7309654188339	-1.78873129523669	34.5196967140706	3	1
32.804487386582	-27.3259445305481	60.1304319171301	3	1
32.8828409921973	-23.7083436244596	56.5911846166569	3	1
32.965677364362	14.8657860323093	18.0998913320527	3	1
33.0527338130117	14.434270525308	18.6184632877037	3	1
33.1448793774213	-17.728856061967	50.8737354393883	3	1
26.4835958972864	-2.65619607277	29.1397919700564	3	1
26.4413209850502	-6.18077137183299	32.6220923568832	3	1
26.5330221583147	32.0992674803422	-5.56624532202754	3	1
12.5393476535448	-15.6104161684747	28.1497638220196	3	1
10.7635796969989	-4.29399095172744	15.0575706487264	3	1
12.8963916683724	-1.69843125519051	14.5948229235629	3	1
23.9623448635627	-7.59432282698673	31.5566676905494	3	1
23.3384987862259	-28.9544961966751	52.292994982901	3	1
23.8247686941196	0.317289181905364	23.5074795122142	3	1
34.6380733543439	-1.24405113470719	35.882124489051	3	1
34.8494387939407	-2.38990388396098	37.2393426779016	3	1
35.0732035243071	15.1402940521056	19.9329094722015	3	1
35.3097971654058	19.8131406632725	15.4966565021333	3	1
35.559682081436	-36.9039284874483	72.4636105688843	3	1
24.032262825678	-7.39789822397463	31.4301610496526	3	1
23.8121573065584	24.9819708568772	-1.16981355031885	3	1
25.9722510727704	18.5576700838791	7.41458098889126	3	1
25.805826256265	-3.19163565630392	28.9974619125689	3	1
26.8902873548789	-2.53549631196965	29.4257836668485	3	1
27.9505461470712	-1.09374940714548	29.0442955542167	3	1
28.9939045823843	-16.909772893872	45.9036774762563	3	1
30.0266733077272	26.9329618100352	3.09371149769196	3	1
38.6157007616443	0.102751528949219	38.5129492326951	3	1
39.0876198352465	-29.7823768432365	68.8699966784831	3	1
39.5925705062247	-2.433884521355	42.0264550275797	3	1
40.1327487349346	-1.71545063623891	41.8481993711735	3	1
40.7106799222216	-18.6019990138733	59.3126789360949	3	1
41.3292785635679	-37.7269776801115	79.0562562436794	3	1
41.9919226082805	-2.94437169277758	44.9362943010581	3	1
42.7025470744715	-0.240465876054933	42.9430129505265	3	1
43.4657632016989	-3.2608459785416	46.7266091802405	3	1
44.2870119509136	15.9226415345218	28.3643704163919	3	1
45.1727644233479	-2.54168284188083	47.7144472652287	3	1
46.1307874880785	-23.7631409070434	69.8939283951219	3	1
47.1704534007736	1.91931940986343	45.2511339909102	3	1
48.3031267441762	19.3598876726941	28.9432390714821	3	1
49.5434067424385	8.95323227790665	40.5901744645318	3	1
50.7911567961269	-9.61092728290929	60.4020840790362	3	1
52.0850153097032	-8.56933927645851	60.6543545861617	3	1
53.4625327170587	-15.3855038937197	68.8480366107783	3	1
54.9393479002971	17.977669312408	36.9616785878891	3	1
56.5440524251343	-29.8118829066631	86.3559353317974	3	1
58.2726846039601	-23.5401467695448	81.8128313735049	3	1
21.9007329570157	10.6456601230893	11.2550728339264	3	1
27.1357482883014	5.31347327236542	21.822275015936	3	1
29.0475498137097	5.55984204293452	23.4877077707752	3	1
31.3946502756077	5.20406381897489	26.1905864566328	3	1
32.4130265945407	5.59759700365658	26.8154295908841	3	1
34.5817757495302	4.97317659303498	29.6085991564953	3	1
36.2739747771174	-9.78490103099742	46.0588758081148	3	1
38.2088918075082	-17.8450932854869	56.0539850929951	3	1
40.8384125298712	-40.09377265417	80.9321851840412	3	1
38.524023946937	-3.66682765543426	42.1908516023713	3	1
33.5748519911039	-4.64966324498222	38.2245152360861	3	1
25.3183454488108	-9.84554943015504	35.1638948789658	3	1
24.1790724962285	32.9256958005272	-8.74662330429874	3	1
27.830512394513	-20.5400105479611	48.3705229424741	3	1
31.4121937472578	24.2951111648866	7.11708258237124	3	1
34.6460089670813	19.7908025615114	14.8552064055699	3	1
36.8660739608248	18.0255411177332	18.8405328430917	3	1
39.4283741763011	-29.9519042877917	69.3802784640928	3	1
41.8647801097804	10.6960274532704	31.16875265651	3	1
44.5413842346259	11.7033253122043	32.8380589224216	3	1
47.0657915877936	4.78194725368035	42.2838443341133	3	1
50.6967384696674	3.39073052544941	47.306007944218	3	1
20.2841790945631	29.5438884975348	-9.25970940297171	3	1
34.0654071684856	22.5516506437098	11.5137565247758	3	1
39.7556680598439	6.60872879200296	33.1469392678409	3	1
45.0934951664981	4.08227296265452	41.0112222038435	3	1
48.5451852129642	-30.8323567238425	79.3775419368066	3	1
52.4230544619731	24.2995250551013	28.1235294068718	3	1
57.3619522037469	-6.0428863665178	63.4048385702647	3	1
58.9869757268717	-5.69690008676511	64.6838758136369	3	1
56.9876342228718	-24.710917355631	81.6985515785029	3	1
56.1220983447581	-3.19249127007756	59.3145896148356	3	1
56.4257277430649	-1.85080005973289	58.2765278027978	3	1
56.9558808783343	-16.2246587510547	73.180539629389	3	1
53.3953536333904	-18.9230618168606	72.318415450251	3	1
51.2749346751003	8.2858910844522	42.9890435906481	3	1
50.1608999855233	-22.7478365757802	72.9087365613035	3	1
41.6152159905716	-4.16748173032278	45.7826977208944	3	1
42.7181927077813	-35.9214742022596	78.6396669100409	3	1
43.8696554141793	-19.0697355044639	62.9393909186433	3	1
45.0700787074688	-3.68791192230653	48.7579906297753	3	1
46.3014607916306	-4.37754918296019	50.6790099745908	3	1
47.5529666763497	-31.5623001399537	79.1152668163034	3	1
48.7925585614223	-5.15626574469215	53.9488243061144	3	1
49.9871644765265	-27.4145764177114	77.401740894238	3	1
51.066707625898	-26.021994779805	77.088702405703	3	1
51.9237310547683	-9.75849444116986	61.6822254959382	3	1
52.4471051893957	-26.970393745979	79.4174989353747	3	1
52.5177256030926	-2.53459336959265	55.0523189726853	3	1
52.078176033439	-20.7808461470388	72.8590221804778	3	1
51.2183932561345	-35.4340361564558	86.6524294125904	3	1
50.1713301745492	-41.5149141037011	91.6862442782502	3	1
49.1701589549382	-19.0389996813275	68.2091586362657	3	1
17.7860595988696	11.6876382903226	6.098421308547	3	1
21.5944756564003	0.901896837615851	20.6925788187845	3	1
26.9686235136052	6.2113718499684	20.7572516636368	3	1
32.8915159956937	17.369917889287	15.5215981064066	3	1
37.2146355303738	0.981200281066747	36.2334352493071	3	1
38.8294114334718	15.1276523522722	23.7017590811995	3	1
40.0266304822634	18.2876858845695	21.7389445976939	3	1
40.4843172743711	22.4737094585981	18.0106078157731	3	1
42.5877525643877	19.8458642333084	22.7418883310793	3	1
43.7090026367682	26.9359079500348	16.7730946867334	3	1
45.6340378537354	29.5257273966094	16.1083104571261	3	1
47.8594910382211	27.1869967622669	20.6724942759542	3	1
49.535683902534	3.12914693324676	46.4065369692872	3	1
52.0018821434577	9.69501057233549	42.3068715711222	3	1
54.0581283389319	40.3660236765314	13.6921046624005	3	1
56.6916988403033	39.5201826019618	17.1715162383416	3	1
56.7150157893063	34.4109405815702	22.3040752077362	3	1
54.3441804369186	6.64647791877336	47.6977025181452	3	1
53.2701965455719	-0.0666486681848009	53.3368452137567	3	1
52.9957874825495	6.84509953378655	46.150687948763	3	1
53.4994368105218	15.2333218310693	38.2661149794525	3	1
53.0169096759954	9.55903367928864	43.4578759967068	3	1
51.951837024243	10.2715352611978	41.6803017630451	3	1
53.3549250778361	37.0219100191626	16.3330150586735	3	1
51.903262369369	47.4848449530538	4.4184174163152	3	1
52.9034685540213	-24.6369251772968	77.5403937313181	3	1
54.1507101362986	-3.99249344908267	58.1432035853812	3	1
52.0480848556999	32.8066556909187	19.2414291647812	3	1
52.3965129094199	16.8599002402278	35.5366126691921	3	1
51.5923978682089	-7.50632589767452	59.0987237658834	3	1
51.722496905647	-4.74184171869721	56.4643386243442	3	1
51.8096918264644	-24.8044639459836	76.6141557724481	3	1
49.7301287491286	1.18101059826526	48.5491181508634	3	1
50.819011189024	1.30944549349971	49.5095656955243	3	1
50.4305108916562	43.2367483542602	7.19376253739608	3	1
39.8438759686782	-3.16270718667446	43.0065831553527	3	1
40.491540299104	-19.3453153629598	59.8368556620638	3	1
41.1664085083517	-5.65799187638267	46.8244003847344	3	1
41.8673487382571	-4.19742066091128	46.0647693991684	3	1
42.5971903310465	49.2678707718364	-6.67068044078982	3	1
42.442207446792	47.8860415338209	-5.44383408702884	3	1
42.2046775703266	6.57460589171411	35.6300716786125	3	1
43.0373429913089	-4.40654239732982	47.4438853886387	3	1
43.9133897366699	-12.0815050399691	55.994894776639	3	1
44.8333374881567	-18.7968558561428	63.6301933442995	3	1
45.8018843691586	-18.7153731493283	64.5172575184869	3	1
46.8206113031227	-15.3938241672026	62.2144354703253	3	1
49.8686094455648	-36.0772631711301	85.9458726166949	3	1
51.0241630757152	-33.9786528783994	85.0028159541146	3	1
52.2467748629628	-36.1934093054906	88.4401841684534	3	1
53.5683332079916	0.699390674050782	52.8689425339409	3	1
54.9957803555572	-0.492047564408737	55.487827919966	3	1
56.5463578879383	-2.06510685321336	58.6114647411516	3	1
58.2471551142705	41.6939436604078	16.5532114538627	3	1
60.1318490859123	41.6898679663751	18.4419811195372	3	1
62.24357670791	-4.49367819813159	66.7372549060416	3	1
64.6266682361569	-21.3327783881966	85.9594466243534	3	1
30.1625546737246	48.2581998339695	-18.0956451602449	3	1
28.6306796909484	45.5175472274469	-16.8868675364984	3	1
36.9304740250413	43.0385420119311	-6.10806798688979	3	1
20.8396265918766	0.997401882633175	19.8422247092435	3	1
21.8213925641841	0.221749437208123	21.5996431269759	3	1
32.535877277043	45.1256801580103	-12.5898028809673	3	1
23.8080714083478	21.6648698667797	2.14320154156809	3	1
25.0064586591998	-34.8623909004205	59.8688495596202	3	1
26.3632859434385	19.0675839636287	7.29570197980977	3	1
27.5075633145156	8.01106129431352	19.4965020202021	3	1
28.6885534271852	-10.3301195569374	39.0186729841226	3	1
29.6996482910751	29.6764621301834	0.0231861608916889	3	1
31.3769273873065	7.52772819499976	23.8491991923067	3	1
32.1670480510766	6.22660577695662	25.94044227412	3	1
30.6862039798386	3.18314334492333	27.5030606349153	3	1
16.0373878471866	3.37121626275748	12.6661715844291	3	1
27.0402027219664	3.95451981895449	23.085682903012	3	1
19.1759059469038	-40.7512314114584	59.9271373583622	3	1
17.2053556395023	-0.614495863526378	17.8198515030287	3	1
17.6283958340159	3.33323423646444	14.2951615975515	3	1
18.1303897926926	-24.9682899553383	43.0986797480309	3	1
28.4807069064214	32.0444377576049	-3.56373085118355	3	1
20.1672908917449	-30.5544435709029	50.7217344626478	3	1
26.9358822275586	-22.5302474378483	49.466129665407	3	1
40.9788462503263	-18.4533665390597	59.4322127893861	3	1
48.4413582765665	-2.50740111081669	50.9487593873832	3	1
52.5848563740825	5.60485336323815	46.9800030108444	3	1
57.369251013974	-43.0984092208569	100.467660234831	3	1
58.560455312078	-39.0665786236195	97.6270339356975	3	1
55.7762070636881	4.67487677182282	51.1013302918653	3	1
55.6289203247284	-49.7644239209906	105.393344245719	3	1
56.6386885422972	-17.0093739375674	73.6480624798646	3	1
56.7143048010175	-8.40338032303506	65.1176851240526	3	1
52.4624282703615	-37.2633258450884	89.7257541154499	3	1
49.2256073608355	25.7272082850531	23.4983990757824	3	1
50.0319170507325	36.3126755719655	13.7192414787671	3	1
41.2265550700324	-5.21955129259529	46.4461063626277	3	1
42.373717514923	-36.1027080714631	78.476425586386	3	1
43.5649482892741	-26.8741321305072	70.4390804197813	3	1
44.7761460476204	-26.5468415766797	71.3229876243	3	1
45.9903176963344	-29.4280544797627	75.418372176097	3	1
47.1793676885928	-27.3990326354877	74.5784003240805	3	1
48.294541387603	-4.00410946681703	52.29865085442	3	1
49.2945360761963	-36.5287113677048	85.8232474439011	3	1
50.094335853724	-55.7216689671391	105.816004820863	3	1
50.5856205483609	-54.3854111312784	104.971031679639	3	1
50.6820975393777	-64.6048649675596	115.286962506937	3	1
50.3484498201439	0.579462687163004	49.7689871329809	3	1
49.6467297675404	-2.62849186428327	52.2752216318236	3	1
48.7367229365579	-11.5090617645261	60.245784701084	3	1
47.7993736384874	-33.2589558258217	81.0583294643092	3	1
37.8799866184638	25.1286756090644	12.7513110093993	3	1
43.180743037492	29.3865752434695	13.7941677940224	3	1
46.2674644727585	23.5559585043605	22.711505968398	3	1
44.5932391033854	5.09034580456416	39.5028932988212	3	1
45.9697375014158	4.99015265538468	40.9795848460311	3	1
47.9528226688856	21.0859604308074	26.8668622380783	3	1
17.4637745565172	32.1106224084613	-14.6468478519441	3	1
21.4132736451295	-0.12774263161887	21.5410162767484	3	1
21.4089558908083	5.37091960512383	16.0380362856845	3	1
47.5599374600257	-1.17123789285746	48.7311753528831	3	1
55.0450702110675	-2.35412686235114	57.3991970734186	3	1
53.7182837040993	-1.86329322417482	55.5815769282741	3	1
53.9418802489203	2.02507751154453	51.9168027373758	3	1
56.0083084435376	33.6326023222876	22.3757061212501	3	1
54.5918616392141	-12.9406512812018	67.5325129204159	3	1
50.1826621831457	3.34461841911805	46.8380437640276	3	1
45.8454151823717	1.14413266564703	44.7012825167247	3	1
43.2876527613902	34.6115377084137	8.67611505297653	3	1
42.2123287172455	35.1871267226163	7.02520199462925	3	1
42.4145634492794	-8.03787107579937	50.4524345250787	3	1
41.5590656646862	-24.768361338366	66.3274270030523	3	1
38.4195339274051	-39.8648990278606	78.2844329552657	3	1
38.8287011479459	-5.8954468518119	44.7241479997577	3	1
39.2220674932769	8.92104181198539	30.3010256812915	3	1
39.5878544194171	-30.1557322024605	69.7435866218775	3	1
39.9151909059355	-33.3405441469074	73.2557350528429	3	1
40.2012111086205	-40.1807530145581	80.3819641231786	3	1
40.4435828438228	-4.26921771082007	44.7128005546428	3	1
40.6406618151553	-1.37260225141502	42.0132640665704	3	1
40.7981108703865	-0.467709196496582	41.2658200668831	3	1
40.9117360328708	-2.21842536270667	43.1301613955775	3	1
40.9767679408704	-1.46865285773892	42.4454207986093	3	1
40.9993807030379	-2.60157533540463	43.6009560384425	3	1
40.9791996311861	-1.03894025794771	42.0181398891338	3	1
40.9153700184692	-2.07683897689186	42.9922089953611	3	1
40.8113204688329	16.6776716366322	24.1336488322007	3	1
40.6531114918554	17.4205938778075	23.2325176140478	3	1
40.2991784520689	-9.92457441173718	50.2237528638061	3	1
39.9356678411344	-15.4452719824595	55.3809398235939	3	1
39.5709463975274	-12.6033028056692	52.1742492031965	3	1
39.2116474283926	-1.15801394458507	40.3696613729777	3	1
38.8629436220493	-5.15192340981637	44.0148670318657	3	1
38.5288566943676	-22.1296415097273	60.6584982040949	3	1
69.2659800142874	5.36744161388766	63.8985384003998	3	1
34.4654704945249	-2.51037809104965	36.9758485855745	3	1
34.437370615314	-3.80314252575775	38.2405131410718	3	1
34.4152157219454	-2.58241296963668	36.9976286915821	3	1
34.3985224697535	-1.86570651537526	36.2642289851288	3	1
34.3912780125704	18.1941542350343	16.1971237775361	3	1
34.3922061688737	-17.9699157935306	52.3621219624043	3	1
34.3967958154507	-7.84027198690707	42.2370678023578	3	1
34.4063672314929	-14.3226755131144	48.7290427446073	3	1
34.4252118344222	0.0792170572916394	34.3459947771306	3	1
34.4485733923973	-22.3812235884651	56.8297969808625	3	1
34.4728623952283	-7.77842796753915	42.2512903627675	3	1
27.5965461492917	-16.1315677918853	43.728113941177	3	1
34.629027940832	-24.8543367462859	59.4833646871179	3	1
34.7392127839811	-1.01860008206642	35.7578128660475	3	1
34.8556498285552	4.0946493266421	30.7610005019131	3	1
34.9783334706444	21.4683836129676	13.5099498576768	3	1
35.1072848901893	-21.7719923298081	56.8792772199975	3	1
35.2425483262852	-8.3258709393734	43.5684192656586	3	1
35.3841879413486	-14.1217762618672	49.5059642032158	3	1
35.5322851678343	0.627638368482009	34.9046467993523	3	1
35.6869364465015	-33.1205202329165	68.8074566794181	3	1
35.8482512775132	-31.3775890692652	67.2258403467784	3	1
36.0163505153084	-2.22001159665166	38.23636211196	3	1
36.1913648455189	-0.630879175558595	36.8222440210775	3	1
36.3734333874491	10.9370056453741	25.4364277420749	3	1
36.5627023689853	-5.49154637518532	42.0542487441707	3	1
36.7593238223343	-20.0510454922104	56.8103693145447	3	1
36.9634542487701	-11.0703200572373	48.0337743060074	3	1
37.1752531985712	-38.3193861587699	75.4946393573411	3	1
37.3948817084856	-2.5261451321027	39.9210268405883	3	1
37.6225005332216	-34.6798899868054	72.302390520027	3	1
37.8578002636108	-34.0556402015519	71.9134404651627	3	1
38.1010227641556	-1.7535750530165	39.8545978171721	3	1
38.3538399074567	5.25823139879992	33.0956085086568	3	1
38.6164603038304	-31.1075741235699	69.7240344274003	3	1
38.8890870877544	-22.614530262778	61.5036173505324	3	1
39.1719140105281	-21.562028987417	60.7339429979451	3	1
39.4651205847931	-19.8105192437581	59.2756398285512	3	1
39.7660788731321	-17.0754708995055	56.8415497726377	3	1
40.0764661589897	-21.5955418766422	61.6720080356319	3	1
40.398040075895	-30.997703545568	71.3957436214629	3	1
40.7273593510837	5.40473227039172	35.322627080692	3	1
41.0665421356215	-20.2255496944513	61.2920918300728	3	1
41.4147268306956	-19.2395093854615	60.6542362161571	3	1
41.7686704057954	-17.8762255359758	59.6448959417712	3	1
42.1329431331595	-31.1941153403735	73.327058473533	3	1
42.5108065316169	-0.581352963299436	43.0921594949163	3	1
42.9023535434859	-55.6118527048448	98.5142062483307	3	1
43.3024164722685	-40.6118739661894	83.9142904384579	3	1
43.7134946364093	4.58799474023099	39.1254998961783	3	1
44.1338135311922	-16.9579656204267	61.0917791516189	3	1
44.5692478331513	-25.0409533830224	69.6102012161737	3	1
45.0410058756943	-27.2795648234766	72.320570699171	3	1
45.5473865813098	-30.3951562251992	75.942542806509	3	1
46.0937238370312	-2.46920607606086	48.5629299130921	3	1
46.6806123946715	-54.4415112468655	101.122123641537	3	1
47.3063420531082	4.05836463050376	43.2479774226045	3	1
47.9821231040734	-10.4524650800756	58.434588184149	3	1
48.7183422123312	-15.0750569211762	63.7933991335073	3	1
49.512198469102	-25.8300462613569	75.3422447304589	3	1
50.3629670879583	-1.92163603576764	52.284603123726	3	1
51.2744111687198	-15.6839701921613	66.9583813608811	3	1
52.2650318351973	4.38190494047088	47.8831268947265	3	1
53.3549576662767	-7.3360976068514	60.6910552731281	3	1
54.5594609101855	-33.2353267968645	87.7947877070499	3	1
55.898029678707	6.53277620759035	49.3652534711166	3	1
57.3960271270894	-13.8021555964669	71.1981827235564	3	1
59.0872617845743	-33.6656901682606	92.7529519528349	3	1
21.6725764943759	48.7773989262607	-27.1048224318848	3	1
25.6198548302271	35.2290629786317	-9.60920814840458	3	1
38.6970427188866	-1.64548120380378	40.3425239226903	3	1
43.5376375809531	1.70885028708429	41.8287872938688	3	1
46.3641671585949	4.55741826233674	41.8067488962582	3	1
46.8082048057668	13.9400647854662	32.8681400203006	3	1
50.4438926003161	29.6267658079686	20.8171267923475	3	1
53.5370574841269	13.3668531953554	40.1702042887714	3	1
34.7271802867063	39.9573642146729	-5.23018392796663	3	1
35.1465463965648	33.2939343788211	1.85261201774373	3	1
36.2165441583205	41.2707090243195	-5.05416486599902	3	1
48.9521241833362	40.8034392478061	8.1486849355301	3	1
57.8479591294839	47.0302753479551	10.8176837815288	3	1
56.2283486447928	46.4890929989317	9.73925564586112	3	1
48.9747900953647	4.36826274429715	44.6065273510675	3	1
48.5338689554474	3.65503771636789	44.8788312390795	3	1
48.7839505613718	3.14414220701359	45.6398083543582	3	1
47.5594771329493	43.6621072019237	3.89736993102554	3	1
47.276822307019	-6.73456112468272	54.0113834317018	3	1
48.2241678465029	29.3731047042133	18.8510631422896	3	1
38.8273987756976	15.6113872029635	23.2160115727341	3	1
33.5934803168214	7.38032028167673	26.2131600351446	3	1
29.3540667141369	0.386092019628088	28.9679746945088	3	1
36.10711207025	-16.8869306975969	52.9940427678469	3	1
36.2454513579623	-14.6118673211605	50.8573186791228	3	1
36.3346713663044	-17.8208066984224	54.1554780647269	3	1
36.3758058138008	-0.297203113815401	36.6730089276162	3	1
28.5657928995983	0.977424970450558	27.5883679291477	3	1
36.308588102417	0.589212483628395	35.7193756187886	3	1
36.2140652662712	-4.00761896651672	40.2216842327879	3	1
36.0854858128833	-1.48979406867059	37.5752798815539	3	1
35.9274952924918	8.46933314969138	27.4581621428004	3	1
35.7447780217638	1.20385559313869	34.5409224286251	3	1
35.5418822235913	-22.1508665444567	57.692748768048	3	1
35.3228306972234	-13.2846147675589	48.6074454647823	3	1
35.0915966241275	-37.7346011941898	72.8261978183173	3	1
34.8516972940613	25.5375235961526	9.31417369790871	3	1
34.6062684983693	30.1579940346195	4.44827446374976	3	1
27.3013956445736	23.9263396318081	3.37505601276554	3	1
34.0602332087752	-1.80667645335741	35.8669096621326	3	1
33.8807424845989	-4.34630264842268	38.2270451330216	3	1
33.7323775691434	-3.32659490886474	37.0589724780081	3	1
33.5878648746478	-16.1697263950003	49.7575912696481	3	1
33.4485713846506	-13.095308641383	46.5438800260336	3	1
33.3159545508047	-21.7680464202453	55.08400097105	3	1
33.1878405250667	-2.98170353329782	36.1695440583646	3	1
33.0633174194139	-3.51181132552523	36.5751287449391	3	1
64.1780188339902	19.5622453684133	44.6157734655769	3	1
29.9098013836119	-40.8122861650386	70.7220875486505	3	1
24.6755484859872	-33.2760539745834	57.9516024605705	3	1
24.8385040818368	-22.640214138127	47.4787182199639	3	1
24.7280074308837	-11.511001455069	36.2390088859527	3	1
24.2840836051317	0.0408584849449528	24.2432251201868	3	1
25.6628587219156	30.0133747146052	-4.3505159926896	3	1
25.1980847399227	26.0929906735274	-0.894905933604634	3	1
27.3685593352376	7.9859068776447	19.3826524575929	3	1
29.9391871446253	-34.6676650918605	64.6068522364859	3	1
26.5337156920991	-1.83164533615925	28.3653610282584	3	1
25.2442692994415	-28.8496304088253	54.0938997082668	3	1
26.0553618578612	1.52019545875226	24.5351663991089	3	1
25.8576468273568	22.3660391598987	3.49160766745809	3	1
26.7860369049859	-2.23760456785343	29.0236414728393	3	1
30.3732280442086	-1.62218769930695	31.9954157435156	3	1
27.9805482917179	-42.1808252476187	70.1613735393366	3	1
25.1270814583835	20.0746130405118	5.05246841787169	3	1
24.7413582904693	27.4426962439602	-2.7013379534909	3	1
28.2192679676491	3.89714513204612	24.322122835603	3	1
28.1837638525787	5.34539259632842	22.8383712562503	3	1
27.1043098306741	-17.7523498589583	44.8566596896324	3	1
26.8879744662086	-21.5702357459172	48.4582102121259	3	1
27.0567876275586	-44.1776184182182	71.2344060457768	3	1
25.7685835227292	-53.619861661558	79.3884451842872	3	1
26.8307353985951	-10.7625618392011	37.5932972377961	3	1
24.1927706695604	-26.1560505972493	50.3488212668096	3	1
25.7792065111995	-44.7284940250935	70.507700536293	3	1
23.6956034901864	22.6018774806729	1.09372600951349	3	1
23.1639794087446	21.8366118526429	1.32736755610172	3	1
32.1456565191651	-16.7969605599651	48.9426170791303	3	1
22.1008551067487	-25.2912200228431	47.3920751295918	3	1
23.4395413458607	-3.87959478812408	27.3191361339848	3	1
24.2909135987418	-43.9268687141013	68.2177823128431	3	1
23.8334347684601	0.858468451149643	22.9749663173105	3	1
23.5043317496972	1.49046231662693	22.0138694330703	3	1
24.4999632036412	19.6089976354047	4.89096556823647	3	1
24.6786387533784	0.826715830397789	23.8519229229806	3	1
33.6130738617687	-57.1798015180965	90.7928753798653	3	1
23.8414000190804	-46.1526211809742	69.9940212000546	3	1
24.4536936460042	21.288714175119	3.16497947088518	3	1
24.8623672056303	35.5722436615903	-10.70987645596	3	1
26.2089708983147	3.76834179290198	22.4406291054127	3	1
26.7389122194844	-3.8267900323365	30.5657022518209	3	1
26.9674131037095	-6.95100015941537	33.9184132631249	3	1
7.79912873732078	-30.7234674164735	38.5225961537943	3	1
6.56367208560789	8.88209489642307	-2.31842281081518	3	1
35.0587874021046	-19.1467012004654	54.20548860257	3	1
35.0983995851154	-29.0107658208294	64.1091654059447	3	1
35.3136673803387	-42.04335329318	77.3570206735187	3	1
35.544275245741	-45.0368264712992	80.5811017170403	3	1
38.7302617804512	-50.098966060412	88.8292278408632	3	1
36.111606101302	-0.986238317962038	37.0978444192641	3	1
36.6578361225077	3.12198707683029	33.5358490456774	3	1
36.9380684310567	-37.0530162664205	73.9910846974772	3	1
37.2326526928094	-2.46977881623259	39.702431509042	3	1
37.5411513385684	-39.9369861608139	77.4781374993822	3	1
37.8664721583195	-44.4012535698701	82.2677257281896	3	1
38.2130436572346	-51.3601276287155	89.5731712859501	3	1
38.5818952843138	32.5393314566103	6.04256382770349	3	1
38.9745801882382	33.7893514934239	5.1852286948143	3	1
39.3934015592029	-19.0241800227438	58.4175815819467	3	1
39.8352717781247	-15.7836270964674	55.6188988745922	3	1
40.2963107339991	-14.4115724792863	54.7078832132854	3	1
40.7746088228299	-32.6480410679689	73.4226498907989	3	1
41.2730670191401	-27.053213177073	68.3262801962131	3	1
41.795900520346	-35.1912578867909	76.9871584071369	3	1
42.344939396096	-4.59011844055784	46.9350578366538	3	1
42.9222373134436	-38.1829516705065	81.1051889839501	3	1
43.5301082072123	-29.4202487544351	72.9503569616475	3	1
44.1609897147449	-49.5207197542388	93.6817094689838	3	1
44.8192931139694	-44.3954583042384	89.2147514182077	3	1
45.5156282364601	-51.382598812729	96.8982270491891	3	1
46.2537130162529	-0.118018397050304	46.3717314133033	3	1
47.0245916833458	-16.1944679012183	63.2190595845642	3	1
47.8344745353139	-12.648430131492	60.4829046668058	3	1
48.6986189938791	-29.3487885291118	78.047407522991	3	1
49.6235326894426	-47.2060054028282	96.8295380922708	3	1
50.6169843013962	-51.7234710889925	102.340455390389	3	1
51.6767730626739	31.5682471147843	20.1085259478896	3	1
52.8157744751904	35.485165380564	17.3306090946264	3	1
54.0549977829113	-6.49199174416656	60.5469895270778	3	1
55.4094837364659	-24.4021627781367	79.8116465146026	3	1
56.8862774903123	-15.8956288578966	72.7819063482089	3	1
58.5067300320715	-24.5788406208222	83.0855706528938	3	1
20.7874148389234	3.46708282201229	17.3203320169111	10	0
47.6006772647971	-6.19262084951573	53.7932981143128	10	0
51.5228352812636	13.1363189566978	38.3865163245658	10	0
52.2893703203555	-5.65123946308523	57.9406097834407	10	0
53.5219554169472	38.2153187243018	15.3066366926454	10	0
53.7711996670387	8.88047137897698	44.8907282880617	10	0
53.3541949070104	27.4253954062898	25.9287995007206	10	0
52.940208852656	3.94590270464313	48.9943061480129	10	0
53.1407237751113	24.693967089933	28.4467566851782	10	0
52.9544123182915	25.9040119734729	27.0504003448186	10	0
53.4619434701494	18.6456415709988	34.8163018991506	10	0
53.9597464852428	22.5841816899103	31.3755647953325	10	0
54.1087981427837	5.32980638394582	48.7789917588379	10	0
50.2420087310923	-38.152936825878	88.3949455569704	10	0
50.9103518935194	0.845608332087315	50.0647435614321	10	0
49.5679673164668	19.7690583874308	29.798908929036	10	0
50.3810497462034	2.98242558328183	47.3986241629216	10	0
47.4281709666294	3.91696592720262	43.5112050394268	10	0
48.3357917221853	30.3179264429089	18.0178652792765	10	0
47.9483740426757	0.689420220775872	47.2589538218999	10	0
49.4970051885494	4.6563846301427	44.8406205584067	10	0
47.7211540768354	19.5877354522055	28.1334186246299	10	0
39.9978635564628	10.8502908365392	29.1475727199236	10	0
40.4972467869013	16.0768404034894	24.4204063834118	10	0
40.9940701767484	17.1445275935747	23.8495425831737	10	0
41.4907495792372	11.5087165376846	29.9820330415526	10	0
41.9709184763017	11.7361942225217	30.23472425378	10	0
42.4277302291882	26.3142945842764	16.1134356449118	10	0
42.8632644232779	27.6129813861921	15.2502830370858	10	0
43.2662253498197	-10.5916479284422	53.8578732782618	10	0
43.6364684201083	5.46503182550205	38.1714365946062	10	0
43.9682370800845	14.4012074890303	29.5670295910542	10	0
44.2581177496453	-23.0376735953549	67.2957913450002	10	0
44.4976897082882	3.03293180436606	41.4647579039222	10	0
44.6833607757232	-11.5291966171056	56.2125573928289	10	0
44.8142557583155	-19.4614890490214	64.2757448073368	10	0
44.8874075379601	8.24787487262327	36.6395326653369	10	0
44.9056969855941	11.8787237780137	33.0269732075804	10	0
44.8735035013208	-5.83961213243583	50.7131156337566	10	0
44.7953594066225	-3.71907146386972	48.5144308704923	10	0
44.677309554532	-22.0034677559615	66.6807773104936	10	0
44.525906404597	-37.2476321788947	81.7735385834917	10	0
44.3478725767432	-21.3124130068065	65.6602855835497	10	0
44.1498005547467	4.67953051354908	39.4702700411976	10	0
43.9379157447411	10.7722405132713	33.1656752314697	10	0
43.7179154225072	-16.3858498904157	60.1037653129228	10	0
43.49492700309	-42.4864166226458	85.9813436257359	10	0
43.2732955757137	21.4655554459916	21.807740129722	10	0
43.0574539020999	18.2850891911298	24.7723647109702	10	0
42.8592035243565	-13.947364203695	56.8065677280515	10	0
42.6843812974902	-13.1189493544581	55.8033306519484	10	0
42.5359332129291	-25.6642675452176	68.2002007581467	10	0
42.4153892843305	-22.7365621108616	65.1519513951921	10	0
42.3213032647001	-50.865108474385	93.1864117390851	10	0
42.254502959646	-19.1582411932331	61.4127441528791	10	0
42.2181335346583	-0.270522710823418	42.4886562454817	10	0
42.2130993118347	9.47927887164209	32.7338204401926	10	0
42.2404156936075	9.95681674721698	32.2835989463905	10	0
42.2983849550026	-0.264707891132432	42.5630928461351	10	0
42.3869744611778	-1.23757135433403	43.6245458155118	10	0
42.5065825344363	-30.2162735270489	72.7228560614852	10	0
42.6582461976179	-19.8837165452706	62.5419627428885	10	0
42.8420202972145	-30.8563236106165	73.698343907831	10	0
43.0600916769073	4.15630164590078	38.9037900310066	10	0
43.3142552575041	1.12486517029665	42.1893900872075	10	0
43.6036394312538	-15.3724404238695	58.9760798551233	10	0
43.9307508788558	-13.7946034359257	57.7253543147815	10	0
44.2962725412378	20.5679763294184	23.7282962118194	10	0
44.698149057171	17.3970206193502	27.3011284378207	10	0
45.1211665136244	-13.826132357106	58.9472988707304	10	0
45.5598459789188	-16.1725076880131	61.7323536669319	10	0
46.015795773887	-2.73776224002509	48.7535580139121	10	0
46.4905477840481	-2.05717595532282	48.5477237393709	10	0
46.9853924105741	-23.7217098171609	70.707102227735	10	0
47.5017877760069	-28.716969716627	76.2187574926339	10	0
48.0413780612947	-5.59602046814868	53.6373985294434	10	0
48.606016752125	-33.7254061148681	82.3314228669931	10	0
49.1977957653138	4.32478011823119	44.8730156470827	10	0
49.819081752214	10.9979816067604	38.8211001454536	10	0
50.4725613123009	-1.20098608283683	51.6735473951377	10	0
51.1612974428667	-21.3242446065314	72.4855420493981	10	0
51.8888003694904	-19.4625039076569	71.3513042771473	10	0
52.6591170513621	-4.98886155026384	57.6479786016259	10	0
53.4769452967004	2.08397830307945	51.3929669936209	10	0
54.3477808091994	10.0658197704673	44.2819610387321	10	0
55.278109022119	-22.7004484776322	77.9785574997511	10	0
56.2756589282091	-44.8570418475928	101.132700775802	10	0
57.3497444045891	26.5275411983896	30.8222032061996	10	0
58.5132522748354	29.5821560299298	28.9310962449056	10	0
18.5147703851393	11.7987379098491	6.71603247529017	10	0
46.5175050677607	24.8769977474286	21.640507320332	10	0
49.9550929113378	35.2534293307215	14.7016635806163	10	0
54.6165604953783	27.5124427173281	27.1041177780502	10	0
59.2496472995812	19.207769587166	40.0418777124152	10	0
56.2526689307807	-37.2449565585164	93.4976254892971	10	0
54.9759973327246	-5.57471812283287	60.5507154555575	10	0
54.6804584620558	16.9356114664448	37.744846995611	10	0
55.1444051228638	33.3010670550589	21.8433380678049	10	0
56.9082731993961	4.46678604987393	52.4414871495221	10	0
55.5663966932387	30.4993699680989	25.0670267251398	10	0
51.7633463156275	32.8162845926741	18.9470617229534	10	0
43.1143660769862	40.3413255870832	2.77304048990297	10	0
44.5265819892321	20.1895536516558	24.3370283375763	10	0
46.0364818651669	20.9376723322512	25.0988095329158	10	0
47.5740495094462	-16.4664875037071	64.0405370131533	10	0
49.2022484605429	13.4845322745475	35.7177161859954	10	0
50.9211375721497	15.6019456137449	35.3191919584048	10	0
52.7388537578447	39.5726663090303	13.1661874488144	10	0
54.6159581542856	14.0543142130288	40.5616439412568	10	0
56.4750399168214	38.5783892635566	17.8966506532648	10	0
58.1676516475888	17.4994520052911	40.6681996422977	10	0
59.425031188501	33.9901705415962	25.4348606469048	10	0
33.7054483893922	40.7907469968939	-7.08529860750177	10	0
39.8543430849423	10.7582168217857	29.0961262631566	10	0
16.8178389238884	20.8556493137939	-4.03781038990542	10	0
18.4561647621879	5.94978568242833	12.5063790797596	10	0
19.8357254149866	-15.4102032015772	35.2459286165638	10	0
21.0113561420003	8.3996435207774	12.6117126212229	10	0
21.9735995993404	-3.33473625931782	25.3083358586582	10	0
51.6415810383317	8.22869349484898	43.4128875434827	10	0
54.9140627430409	6.76484874614191	48.149213996899	10	0
51.2968120488577	-2.06416318691523	53.3609752357729	10	0
51.2030972700426	17.9125532830215	33.2905439870211	10	0
49.0755534259971	30.330828044666	18.7447253813311	10	0
51.0664288422042	16.5743656738756	34.4920631683285	10	0
54.1008894439882	24.0503043185743	30.0505851254139	10	0
52.2618198556068	28.2543068925804	24.0075129630264	10	0
52.1082922381301	11.6481944764412	40.4600977616889	10	0
52.4523751726451	5.50528489306737	46.9470902795777	10	0
49.150635675009	30.0197013081177	19.1309343668913	10	0
48.8311127603989	5.93972494852578	42.8913878118731	10	0
47.2681463027376	6.29218295271023	40.9759633500274	10	0
47.4375823771543	8.05721987583677	39.3803625013175	10	0
45.7341145766417	9.06800012869498	36.6661144479468	10	0
46.0732766489817	8.64514471482918	37.4281319341526	10	0
46.6090343878531	8.61136418249159	37.9976702053616	10	0
46.3963228444614	1.75190074561468	44.6444220988467	10	0
45.5580604784715	39.6359365252663	5.92212395320514	10	0
39.1816197435354	-0.211848862473293	39.3934686060087	10	0
39.7136648516079	3.1939964650949	36.519668386513	10	0
40.2534062905409	8.30746173779154	31.9459445527494	10	0
40.7863286665604	14.6444511817523	26.1418774848081	10	0
41.3116172731281	20.5255975401825	20.7860197329456	10	0
41.8327770298498	21.1335042842886	20.6992727455611	10	0
42.3415968979748	-4.3511243598224	46.6927212577972	10	0
42.8197406551303	-11.0290825988875	53.8488232540178	10	0
43.2656081359722	1.77452460492832	41.4910835310439	10	0
43.6688179643011	-30.4379405966924	74.1067585609935	10	0
44.0133176627381	-22.0463871692281	66.0597048319662	10	0
44.2933668372502	-22.0262696360563	66.3196364733065	10	0
44.5044056383089	-19.8749514279831	64.379357066292	10	0
44.6435309996261	7.27561619518814	37.367914804438	10	0
44.7162630260988	-26.0769059055746	70.7931689316735	10	0
44.7218229288923	3.01122467187351	41.7105982570188	10	0
44.6533108254445	-28.9497149352823	73.6030257607268	10	0
44.5135369292913	-21.8853144200196	66.3988513493109	10	0
44.3114349296811	37.0674684471028	7.24396648257825	10	0
44.0579591777416	37.7553066026685	6.3026525750731	10	0
43.7604133066355	-21.7944993691507	65.5549126757862	10	0
43.4299171574404	-9.07021118522074	52.5001283426611	10	0
43.0772129642814	10.8632563471811	32.2139566171004	10	0
42.6238065729008	13.3762322048479	29.2475743680529	10	0
18.8477644000184	42.9348634611824	-24.087099061164	10	0
21.6610937794288	3.7527358155329	17.9083579638959	10	0
19.3929552104655	25.2576571141668	-5.86470190370128	10	0
24.865204536141	1.6940165157194	23.1711880204216	10	0
20.4247760108618	2.40780812220631	18.0169678886555	10	0
41.7391365001695	15.0292899250806	26.7098465750889	10	0
48.6976964087498	17.864931170103	30.8327652386468	10	0
51.7126249337535	25.2773909307001	26.4352340030534	10	0
57.3446435493973	25.043174522949	32.3014690264483	10	0
53.2668443143149	15.0739117872278	38.1929325270871	10	0
51.3831920342015	-1.58476069419084	52.9679527283924	10	0
51.3779319568323	35.1844899380887	16.1934420187436	10	0
50.590197261577	6.21140431404358	44.3787929475334	10	0
50.6788766578511	17.8743791808446	32.8044974770066	10	0
48.2256530184951	21.5486397243185	26.6770132941767	10	0
43.5792441978729	1.72591269013046	41.8533315077424	10	0
43.4508517448166	3.24027579322767	40.2105759515889	10	0
42.5742535226072	5.3277930745371	37.2464604480701	10	0
38.0017621853756	16.6061925390835	21.3955696462921	10	0
38.5068520270792	17.7317598456339	20.7750921814453	10	0
41.843690983972	8.86880559200646	32.9748853919656	10	0
39.4702972944033	21.8558954894209	17.6144018049824	10	0
39.7650361766148	22.3504410994972	17.4145950771176	10	0
39.9754869312916	24.4460185571815	15.5294683741101	10	0
40.0982469908159	13.7740908659007	26.3241561249152	10	0
40.1329116745121	1.82040730514755	38.3125043693645	10	0
40.0823677041799	13.575298956236	26.5070687479439	10	0
39.9527171451061	13.686056030997	26.2666611141091	10	0
39.752804425309	17.9165495931085	21.8362548322005	10	0
39.4934135651782	20.7934617582474	18.6999518069307	10	0
39.186285230431	2.95804119572943	36.2282440347016	10	0
38.8431408323251	-5.91013309376364	44.7532739260887	10	0
38.4748800462612	-23.9568143840579	62.4316944303191	10	0
38.0910518204235	-15.8715523265522	53.9626041469757	10	0
37.6996178788005	3.64567029246674	34.0539475863338	10	0
37.3069623112076	-33.4392579966978	70.7462203079054	10	0
36.9180672621767	-44.7826460068028	81.7007132689795	10	0
36.5367722203767	0.283279170426467	36.2534930499502	10	0
36.1660517507045	11.7145389428057	24.4515128078988	10	0
35.8082706964591	11.3164190665962	24.4918516298628	10	0
35.4653976898011	13.7763516170163	21.6890460727848	10	0
35.1377640037214	18.5744358030286	16.5633282006928	10	0
34.8242648824484	13.6747482923656	21.1495165900828	10	0
34.5260284954499	1.52984326231177	32.9961852331381	10	0
34.2443057523018	1.861902577688	32.3824031746138	10	0
33.9804789826482	8.40110981218299	25.5793691704652	10	0
33.7361020099916	8.82407885423767	24.912023155754	10	0
33.5129370254259	16.8178948660531	16.6950421593728	10	0
33.3129902943506	18.7985464727242	14.5144438216264	10	0
33.1385480543445	10.5065549526952	22.6319931016492	10	0
32.9921465951427	5.33619165677638	27.6559549383663	10	0
32.8760103936748	-4.28854172644486	37.1645521201197	10	0
32.7857832798304	-0.424027693195772	33.2098109730262	10	0
32.7116744428484	-1.8807565028768	34.5924309457252	10	0
32.6565806002425	12.8728451781622	19.7837354220803	10	0
32.6204262646751	12.9241913217862	19.6962349428889	10	0
32.597808446933	0.694938235821776	31.9028702111112	10	0
32.5882968160931	12.2695958098952	20.3187010061978	10	0
25.6572169781181	2.81660677715623	22.8406102009619	10	0
24.7574913683981	2.27615994025934	22.4813314281388	10	0
24.9516971452847	31.871214747644	-6.9195176023593	10	0
23.7246820146894	23.7691929771663	-0.0445109624768951	10	0
23.8261789946455	16.3173798172006	7.50879917744487	10	0
23.9318400576649	32.5018297948374	-8.56998973717257	10	0
24.4868403258988	18.735618361972	5.75122196392678	10	0
24.6624424438034	33.9287684524177	-9.26632600861425	10	0
21.9604732372034	17.7726336171326	4.18783962007082	10	0
22.2386920383383	18.0987246864902	4.13996735184819	10	0
22.8489136239765	18.8790094103093	3.96990421366724	10	0
28.8722923813337	18.9121322761987	9.96016010513498	10	0
22.5217092608258	21.6723328743333	0.849376386492506	10	0
23.963264761446	7.68485834413159	16.2784064173144	10	0
31.2447636692151	8.26801723110623	22.9767464381089	10	0
26.6568989899935	30.7237229680708	-4.06682397807728	10	0
27.3306129607521	8.93124551516271	18.3993674455894	10	0
26.3458648952522	8.09448577057826	18.251379124674	10	0
26.0745697907616	8.64338268486276	17.4311871058988	10	0
27.4659643708777	29.5052680745318	-2.03930370365407	10	0
27.4594220698411	31.9986376443586	-4.53921557451748	10	0
26.6568071740481	10.8999250371968	15.7568821368513	10	0
25.7570992713636	12.1316908694297	13.625408401934	10	0
25.1135177530751	12.9099411590974	12.2035765939777	10	0
26.4830617495725	13.5456033454832	12.9374584040893	10	0
27.3233775741375	26.7138246564219	0.609552917715542	10	0
27.7160176972888	16.4432712248642	11.2727464724247	10	0
28.4644574644521	10.4841498159071	17.9803076485449	10	0
27.9821542448081	24.3725021672736	3.60965207753445	10	0
34.7691966277353	11.0038232156046	23.7653734121307	10	0
34.9954591914392	2.7988052923882	32.196653899051	10	0
30.2732057711018	-6.29063444020107	36.5638402113028	10	0
35.5363625614586	-5.72710691743696	41.2634694788956	10	0
35.8052395026463	11.6104959840185	24.1947435186278	10	0
36.0894968802216	11.918454018036	24.1710428621856	10	0
33.2242110824217	30.3533566719783	2.8708544104434	10	0
36.7687872706783	24.2414328114817	12.5273544591966	10	0
37.0981659846722	12.522839918407	24.5753260662652	10	0
37.4431337185233	17.6090366937116	19.8340970248116	10	0
37.8020608797498	17.7265924659819	20.0754684137679	10	0
38.1773343325674	17.8448178955453	20.3325164370221	10	0
38.572616085473	17.9643768092818	20.6082392761912	10	0
38.9890403581036	18.0862571735849	20.9027831845187	10	0
39.4213421483653	9.30902848079052	30.1123136675748	10	0
39.8722566064345	18.3423179280642	21.5299386783703	10	0
40.3473383190435	18.4782781497021	21.8690601693414	10	0
40.848194058677	18.6213342119853	22.2268598466916	10	0
41.3766226983252	16.3551022256231	25.0215204727022	10	0
41.9359837240001	22.0160190690093	19.9199646549908	10	0
42.5205286215202	16.7967103428035	25.7238182787167	10	0
43.1303679511895	19.2990784681625	23.831289483027	10	0
43.7676184607224	19.2991998575861	24.4684186031363	10	0
44.4346383448431	25.4148612543986	19.0197770904445	10	0
45.1340649823869	28.8198159544825	16.3142490279044	10	0
45.868859477267	16.1709530976995	29.6979063795676	10	0
46.6423591680077	29.1696169110171	17.4727422569906	10	0
47.4583392892899	32.3001977779291	15.1581415113608	10	0
48.3210847679969	7.68525673295732	40.6358280350395	10	0
49.2354724534884	-14.1160640655573	63.3515365190457	10	0
50.2070623847813	-2.65392843276264	52.860990817544	10	0
51.2421928975256	-12.6559158547212	63.8981087522468	10	0
52.3480662176621	-34.9013995621501	87.2494657798121	10	0
53.5327939298834	-35.9755839564211	89.5083778863045	10	0
54.8053351435617	-11.6987407643771	66.5040759079388	10	0
56.175181901407	-38.7433137216026	94.9184956230096	10	0
57.6514763091328	-10.7834133968134	68.4348897059462	10	0
59.2154242525505	18.8145311383287	40.4008931142217	10	0
14.5599459823854	29.1591842694137	-14.5992382870283	10	0
14.7085039409464	20.5152673483443	-5.80676340739789	10	0
29.3531189237292	7.69818302446477	21.6549358992644	10	0
28.4829209447874	-0.210150545542895	28.6930714903303	10	0
28.2551349794512	4.3735750088952	23.881559970556	10	0
28.1593381725391	13.8359662719737	14.3233719005654	10	0
32.4838349303016	3.70760684212802	28.7762280881736	10	0
42.7806653752096	3.30776424547414	39.4729011297355	10	0
50.0856465479647	13.8261903803383	36.2594561676264	10	0
53.153848137944	41.0011996754901	12.1526484624539	10	0
54.3614770735474	39.6233862896704	14.7380907838771	10	0
53.9770098045541	44.2403529989282	9.73665680562594	10	0
53.9430661298581	31.2205430641725	22.7225230656856	10	0
52.3630843578077	24.8761194336871	27.4869649241205	10	0
48.4599814027699	26.8827362702866	21.5772451324833	10	0
49.4709967606422	27.6111220641777	21.8598746964645	10	0
50.2990745961025	27.2508237493034	23.0482508467991	10	0
51.0118322667101	46.4990384521378	4.51279381457222	10	0
51.0347227163833	48.4000983692879	2.63462434709548	10	0
50.2760378273661	48.7755265556664	1.50051127169965	10	0
45.8857924103218	31.8205364071705	14.0652560031512	10	0
43.3061813903643	32.6724204210445	10.6337609693198	10	0
44.8111661903014	60.9776031881374	-16.1664369978359	10	0
24.2641626339967	3.9892779287515	20.2748847052452	10	0
29.2911034295855	21.969515673081	7.32158775650446	10	0
33.4021846558941	11.6312663070877	21.7709183488064	10	0
36.4137754333886	13.1001928982566	23.3135825351319	10	0
37.9696742513936	3.52226147982472	34.4474127715688	10	0
39.3922782179415	2.26780204375015	37.1244761741914	10	0
40.1188033242479	32.1854130113672	7.93339031288073	10	0
42.470886573858	10.2843154134068	32.1865711604512	10	0
44.2504103433825	20.5234053545365	23.727004988846	10	0
45.9641408465924	29.2959488506278	16.6681919959646	10	0
47.8918990599891	28.4669557224173	19.4249433375718	10	0
49.5563667274317	27.1714707230809	22.3848960043509	10	0
23.3823788756985	24.9537052929698	-1.5713264172713	10	0
21.094782951868	5.06387295751361	16.0309099943543	10	0
22.7931580734028	6.41267848581903	16.3804795875837	10	0
24.2012905631778	1.55877034221202	22.6425202209658	10	0
16.9348021420878	8.29378754429968	8.64101459778809	10	0
24.5919963552415	19.0755154107186	5.51648094452286	10	0
29.4529468179722	22.2990188667433	7.15392795122889	10	0
17.2515702928312	29.3751021818295	-12.1235318889983	10	0
20.2667872228724	40.4225659769893	-20.1557787541169	10	0
19.2688270623667	31.3682440671303	-12.0994170047636	10	0
20.19950823001	32.3149046355462	-12.1153964055361	10	0
16.3731653139559	46.1032563985898	-29.7300910846339	10	0
29.2011232991629	38.9076594613361	-9.70653616217319	10	0
30.683372717821	39.33194980375	-8.64857708592903	10	0
50.9494647862588	24.0517642329469	26.8977005533119	10	0
54.8873628503631	19.9438507343279	34.9435121160352	10	0
56.7885414494409	23.6411972871732	33.1473441622677	10	0
56.7245740758448	7.03434341679556	49.6902306590493	10	0
55.83137652121	7.00073111534816	48.8306454058619	10	0
56.3467334755412	7.69542588371167	48.6513075918295	10	0
55.4535484749984	14.4769918036408	40.9765566713576	10	0
54.4300875872791	24.6179870799016	29.8121005073776	10	0
52.1149142783999	31.8623409214846	20.2525733569154	10	0
51.9313939439736	-16.4980134168738	68.4294073608474	10	0
50.2737606671986	5.60667498781709	44.6670856793815	10	0
50.3413190994267	19.2099284157903	31.1313906836364	10	0
40.746920680327	12.2660390636788	28.4808816166482	10	0
41.689439633896	-21.5834045659547	63.2728441998507	10	0
42.6717408366782	-31.5214936648288	74.193234501507	10	0
43.6946662305139	19.5615559067488	24.1331103237651	10	0
44.7607172664929	36.9429795985368	7.81773766795612	10	0
45.8449459577739	37.6040600192793	8.24088593849455	10	0
46.9236428521071	34.7253861871153	12.1982566649917	10	0
47.9604404292303	14.0176815043233	33.942758924907	10	0
48.9044878692412	10.2090013640529	38.6954865051883	10	0
49.6904176048375	6.939770777746	42.7506468270916	10	0
50.2326361961187	1.2006203741385	49.0320158219802	10	0
50.4516447941863	11.7250304688132	38.7266143253731	10	0
50.2978784655195	5.71176739528748	44.586111070232	10	0
49.7963351613977	12.3817772931282	37.4145578682695	10	0
49.0717789007763	4.3665882098526	44.7051906909237	10	0
48.3048519075765	5.34716331583701	42.9576885917395	10	0
29.0320777333004	7.38879552154457	21.6432822117558	10	0
38.0226344296222	6.50291741255193	31.5197170170703	10	0
49.4631531078738	-7.54119365119962	57.0043467590735	10	0
49.7507187574012	27.0554600872084	22.6952586701928	10	0
51.1924911307315	29.5914152335511	21.6010758971804	10	0
53.344836052262	12.6655195577173	40.6793164945447	10	0
55.3209610455701	13.4660451536467	41.8549158919234	10	0
54.9274283350003	34.9677980868834	19.9596302481169	10	0
49.3222812427849	15.8114445502719	33.510836692513	10	0
48.8358599260917	6.56350885208161	42.2723510740101	10	0
40.7523567023626	-0.0697826081810422	40.8221393105436	10	0
41.7565653201968	2.89969961664655	38.8568657035503	10	0
42.7713517988331	-0.104294291936407	42.8756460907695	10	0
43.7863940607289	6.16159511439838	37.6247989463305	10	0
44.7734071501041	10.7658192953738	34.0075878547303	10	0
45.6942512779028	2.36404986089621	43.3302014170065	10	0
46.5148934003414	2.12827182982538	44.386621570516	10	0
47.1900327172206	2.95321498702309	44.2368177301975	10	0
47.6722596041954	28.1745466543917	19.4977129498037	10	0
47.9171959328997	29.756217692253	18.1609782406467	10	0
47.8995149730259	24.8375123386184	23.0620026344075	10	0
47.6221520185454	26.549300972886	21.0728510456595	10	0
47.1153152819079	16.6967811453136	30.4185341365943	10	0
[truncated: 10,825 more rows]
