# Supplementary material for: A sensorimotor model shows why a spectral jamming avoidance response does not help bats deal with jamming
Source: eLife. 2020 Jul 28;9:e55539. doi: 10.7554/eLife.55539 (PMC7406351; doi:10.7554/eLife.55539)
Supplement: Figure 2—figure supplement 6—source data 2. [file elife-55539-fig2-figsupp6-data2.txt]

ExperimentName	NumberOfBats	NumOfPreys	PreyTOBatsRatio	ReceiverType	PulseDuration_Search	PulsePower	CrossTalkFlg	NumberOfCatches	NumberOfPulses	NumberOfDetections	NumberOfInterfernces	NumberOfInreferencesFromDirectCalls	NumberOfInreferencesFromMasking	InterferenceToHuntedRatio	TotalInterferenceRatio	Reference_PowerDetector_TotalRatio	Search_MaskingRatioToHunted	Approach_MaskingRatioToHunted	Buzz_MaskingRatioToHunted	MaskingLevelDB_ave	MaskingLevelDB_Q90	SIROfDetectedPreys_ave	SIROfDetectedPreys_std	Range_est_err_ave	Range_est_err_std	DF_est_err_ave	DF_est_err_std	Range2_hunted_err_ave	Range2_hunted_err_std	DF2_hunted_err_ave	DF2_hunted_err_std	SIR2_hunted_ave	NumberOfPreyCluttered	fb_det_SIRdb	fb_masking_powerdb	fb_FA_rate	fb_mean_err_microsec	fb_std_err_microsec	fb_SIR2_hunted_ave	fb_mean_err2_hunted	fb_std_err2_hunted
fb_rec20p_per1	2	20	10	FilterBank	7	110	1	5	355	668	18	0	0	0.00298507462686567	0.0269461077844311	0	0	0	0	1.03319637090461	1.072319964649	23.2562301720753	19.4152643999748	0.293891364596747	3.68916040109827	0.00367028098064129	0.124772843170854	-0.0349259181260767	1.26359012311452	0.00671848744762373	0.0963138105269895	41.0797093515806	0	23.2562301720753	5.93347957996439	0.00597014925373134	51.2831325301205	119.260635593807	41.0797093515806	49.2096219931272	88.9582275673565
fb_rec20p_per1	2	20	10	FilterBank	7	110	1	2	430	581	12	0	0	0.0103896103896104	0.0206540447504303	0	0	0	0.0146520146520147	1.07598971909135	1.93727465073689	24.0638033381235	15.7408974275982	0.12953560978779	2.30117864104305	0.00491336772891515	0.153718646010477	0.0588513142569225	3.75217584622433	0.00102982175585195	0.147529843100279	32.403986928533	0	24.0638033381235	2.27355696569097	0.0025974025974026	8.90121317157712	86.1111540348874	32.403986928533	34.9607250755287	61.6137157454209
fb_rec20p_per1	2	20	10	FilterBank	7	110	1	4	450	652	14	0	0	0.00495049504950495	0.0214723926380368	0	0.0263157894736842	0.0196078431372549	0	1.64310333900278	3.99485844047126	28.5642864788532	16.9903220245752	0.0686753803074163	2.37022650343574	-0.0139819935175145	0.161429674576872	-0.0404599462038332	0.965198805575733	-0.00649489280472866	0.14267048582228	40.1005975943241	0	28.5642864788532	5.83839175081198	0	54.2981366459627	80.0676886828704	40.1005975943241	58.1058201058201	62.4474265290003
fb_rec20p_per1	2	20	10	FilterBank	7	110	1	4	384	539	9	0	0	0	0.0166975881261596	0	0	0	0	1.07107769834085	1.40913440343944	25.7706391809359	16.8106891220003	0.0641101359364509	1.45735081951449	0.0136347910871058	0.141487026005842	-0.151341937792826	2.40120465670069	0.0196115836345506	0.130656953531982	35.9482806867392	0	25.7706391809359	6.92716435742169	0	56.5767097966728	138.371133165841	35.9482806867392	52.343949044586	84.6074727910417
fb_rec20p_per1	2	20	10	FilterBank	7	110	1	2	360	487	37	0	0	0.0168918918918919	0.0759753593429158	0	0.0645161290322581	0.0465116279069767	0.00641025641025641	2.74804320317757	7.05228894966923	24.3512253497383	18.0562407696942	-0.110625599547742	6.293897564116	-0.0149097975742428	0.264649556632918	-0.322996126479821	3.43056736652386	-0.0229245850308536	0.130883791711967	37.2540893881337	0	24.3512253497383	13.2506562190093	0.0135135135135135	52.093023255814	108.368602649499	37.2540893881337	52.3460556028579	71.1641214451074
fb_rec20p_per1	2	20	10	FilterBank	7	110	1	2	366	434	35	0	0	0.0302114803625378	0.0806451612903226	0	0.0344827586206897	0.0196078431372549	0.0306748466257669	3.28813765179265	9.72341627398763	26.0187380292409	18.7857628367791	0.126685051325892	5.72854307913363	-0.00156643775961067	0.144931088507907	0.567317795263098	8.55689150774581	-0.00353414154263027	0.13319819306716	35.6151560481186	0	26.0187380292409	16.1418194360043	0.0151057401812689	21.0363196125908	87.0422904579689	35.6151560481186	39.5458333333333	73.7406825781067
fb_rec20p_per1	2	20	10	FilterBank	7	110	1	2	389	506	39	0	0	0.0105540897097625	0.0770750988142292	0	0.0172413793103448	0	0.0106761565836299	2.4292359213159	7.28388807457806	25.1261148758532	17.5885871511872	0.0767067990463883	3.56936497520242	-0.00646511825305381	0.154032477028353	0.16466964418397	1.96786228715436	-0.0068157394458322	0.150340704367849	34.1975603014095	0	25.1261148758532	9.88110656092284	0.0184696569920844	54.8897637795276	105.691578271395	34.1975603014095	65.525	61.8078679391624
fb_rec20p_per1	2	20	10	FilterBank	7	110	1	5	380	480	44	0	0	0.0377358490566038	0.0916666666666667	0	0.14	0	0.0223880597014925	2.38209813209933	7.89274226311534	25.1378147726393	17.8149034079459	-0.150272263504499	5.01989850038949	0.00275487520403062	0.145677504652382	0.0548860215039653	3.30030763466025	-0.00461250837009873	0.146148988169267	32.7962683238205	0	25.1378147726393	9.81660951497022	0.0134770889487871	44.9171974522293	116.410021601022	32.7962683238205	48.2929936305733	63.2913301702186
fb_rec20p_per1	2	20	10	FilterBank	7	110	1	6	445	469	31	0	0	0.0343915343915344	0.0660980810234542	0	0	0	0.00732600732600733	2.20725737819614	6.03205739449344	23.1428226515378	18.0759283309505	-0.246523729020078	4.81186895965121	-0.00707504625677843	0.155889910184031	-0.255651223369202	3.55893835087865	0.000166861804840034	0.141819319358735	29.6235119445342	0	23.1428226515378	15.2578752211707	0.0238095238095238	46.1960784313726	76.2280300218162	29.6235119445342	55.0365853658537	55.4441494054091
fb_rec20p_per1	2	20	10	FilterBank	7	110	1	3	449	547	34	0	0	0.0451127819548872	0.0621572212065814	0	0.03125	0	0.0072202166064982	1.92632741737709	4.45023396575228	26.2646403412658	20.0104507542301	0.0206687504071625	3.32305985250973	0.018700503629957	0.350062187217911	0.225329629137275	4.36340546497699	0.0171659068335288	0.147137557621889	36.6264060779984	0	26.2646403412658	12.8964661956905	0.0225563909774436	4.48689138576779	109.578361350438	36.6264060779984	34.1163776493256	84.0824655873025
fb_rec20p_per1	2	20	10	FilterBank	7	110	1	2	379	395	15	0	0	0.0134680134680135	0.0379746835443038	0	0.0263157894736842	0	0.00892857142857143	1.7331242052628	4.67305556128575	24.219061751655	16.4374341543385	-0.172338580037332	3.22039112117819	0.00136208001848874	0.143869967612319	0.234149254952109	4.28750209620298	0.00722623286656357	0.146370355891272	30.8379821212945	0	24.219061751655	10.2306835135722	0	-2.09090909090909	89.7133088820376	30.8379821212945	23.5609756097561	62.6740380246048
fb_rec20p_per1	2	20	10	FilterBank	7	110	1	7	557	781	34	0	0	0.0235934664246824	0.0435339308578745	0	0.03125	0.0307692307692308	0.0217864923747277	1.43836640111196	1.86643407793304	24.4186704096651	16.2314553191133	-0.129101561936397	3.16716851698685	0.00507540715572489	0.130784373917427	-0.0730383492149249	4.448453458557	0.00280168554161854	0.121431946339748	30.7312246479208	0	24.4186704096651	7.98182660051107	0.00362976406533575	17.3316062176166	97.0529633897619	30.7312246479208	37.9921722113503	64.3513634495903
fb_rec20p_per1	2	20	10	FilterBank	7	110	1	6	589	860	27	0	0	0.0154738878143133	0.0313953488372093	0	0.105263157894737	0	0.0132743362831858	1.6562591741782	4.78339980320544	25.1405200562812	16.1134739191761	-0.0848144340924767	3.33811641538818	0.00922248224536604	0.309051789837281	-0.0341597070482097	4.30571465168831	0.00582747045707499	0.146739003770634	34.8494207606342	0	25.1405200562812	7.04826958766515	0.00193423597678917	36.8094117647059	67.1294928917834	34.8494207606342	44.3849372384937	53.1643780495202
fb_rec20p_per1	2	20	10	FilterBank	7	110	1	8	354	562	18	0	0	0	0.0320284697508897	0	0	0	0	0.930279839340951	1.74858207449661	27.448902121969	17.3395814392522	-0.000253369076713396	2.72680862767075	-0.000399429797480045	0.137824778636938	0.0763345625377855	0.987149276558454	-0.000332885630246111	0.121627800121835	40.095283993885	0	27.448902121969	3.63542002027977	0.0029673590504451	6.74594594594595	93.3895144275583	40.095283993885	27.1188811188811	64.6063914616124
fb_rec20p_per1	2	20	10	FilterBank	7	110	1	4	480	622	17	0	0	0.00428265524625268	0.0273311897106109	0	0.0192307692307692	0.027027027027027	0	1.44147223490321	2.09276330341131	26.9453170611907	15.5131983730183	0.118094493299759	2.17543823057054	-0.000282490209436258	0.134903259752667	-0.185006608657561	4.65447437641607	0.000296452348480613	0.134411162442561	34.2303790382931	0	26.9453170611907	9.31927623129412	0.00428265524625268	11.6019575856444	118.863345477579	34.2303790382931	38.790243902439	75.140031637361
fb_rec20p_per1	2	20	10	FilterBank	7	110	1	2	333	418	15	0	0	0.0149253731343284	0.0358851674641148	0	0	0	0.0263157894736842	2.12664424478119	5.61918073277688	24.5113115953489	17.0302972901114	-0.408901744331679	3.77732342318421	0.00265719809071545	0.148421647950262	-0.735403678169008	5.8561704558349	0.00469074653532812	0.139291115523284	34.9129597879209	0	24.5113115953489	10.7505008385422	0.00746268656716418	40.9685230024213	110.126456337406	34.9129597879209	54.48	73.3020844034427
fb_rec20p_per1	2	20	10	FilterBank	7	110	1	5	494	663	26	0	0	0.0123203285420945	0.0392156862745098	0	0.0434782608695652	0	0.00757575757575758	2.38671899728697	8.67865265272718	26.4002579961636	14.8050524782163	0.0343711312159162	2.20229112940784	-0.0123121075732583	0.154701679957413	-0.0327614258097121	1.33984597842129	-0.0150876929183967	0.156950112027656	32.1854782123829	0	26.4002579961636	7.84283786196171	0.0082135523613963	49.7073170731707	102.436215900716	32.1854782123829	60.6547085201794	55.189984947037
fb_rec20p_per1	2	20	10	FilterBank	7	110	1	4	420	600	38	0	0	0.0202020202020202	0.0633333333333333	0	0.133333333333333	0	0	3.27272927555073	12.8080171184134	26.6668513488179	18.7668601724909	0.010953727849038	2.89200436326056	-0.00827130579373555	0.166872401816473	-0.0288672547690408	1.62973854044715	-0.00179903447111384	0.146535241331161	38.3994562258278	0	26.6668513488179	12.6225626971602	0.00757575757575758	43.3565505804312	109.383703481905	38.3994562258278	60.2093023255814	51.4571612775341
fb_rec20p_per1	2	20	10	FilterBank	7	110	1	7	555	823	35	0	0	0.0130841121495327	0.0425273390036452	0	0.0555555555555556	0.0158730158730159	0.00911161731207289	2.37627908218279	7.83180722321156	27.3058573515898	17.8665914907941	-0.0754317242914847	3.25209637794135	-0.00100881517942925	0.149801591810669	-0.0339688916520541	0.922291109946375	-0.000279087801978038	0.146032419538202	38.3596579085002	0	27.3058573515898	8.08329795681208	0.00373831775700935	32.1977750309023	64.7673708110498	38.3596579085002	45.6065573770492	41.155099509531
fb_rec20p_per1	2	20	10	FilterBank	7	110	1	3	270	292	19	0	0	0	0.0650684931506849	0	0	0	0	2.30817423263265	7.17636396115929	26.5095221039951	17.4654483399878	0.151130999631	2.12314252067079	-0.0194890885193406	0.157767839985245	0.166488828674709	2.28433461725368	-0.0187200362098882	0.172474449618719	37.7479750372415	0	26.5095221039951	10.7874132720403	0.0339805825242718	-29.745704467354	116.688934884968	37.7479750372415	5.97297297297297	81.5542844085276
fb_rec20p_per1	2	20	10	FilterBank	7	110	1	6	537	871	59	0	0	0.0329457364341085	0.0677382319173364	0	0.0357142857142857	0	0.00842696629213483	3.3947171902507	13.5373755232639	23.2506675890457	17.7701476195368	-0.148186292942038	3.33166768500221	-4.5795097062717e-05	0.144096314264292	-0.391600993510204	4.52587222125216	0.00575287892153153	0.13209610787154	35.3947105703245	0	23.2506675890457	10.2732038702476	0.00193798449612403	18.1559953434226	77.0913475702114	35.3947105703245	41.3398058252427	58.1381530064268
fb_rec20p_per1	2	20	10	FilterBank	7	110	1	5	429	653	60	0	0	0.0272479564032698	0.0918836140888208	0	0.0303030303030303	0.0606060606060606	0.00434782608695652	2.77630627834795	9.41049614863787	24.2074113333718	19.4206224815669	0.35807037185604	5.37190804157842	0.00821034741774924	0.160643505823592	-0.523008920688768	5.18450163840924	0.0140410259817256	0.13779167214575	38.3593645448596	0	24.2074113333718	11.6490697378578	0.00817438692098093	52.4278768233387	99.4299257301951	38.3593645448596	54.7429467084639	55.2251230778398
fb_rec20p_per1	2	20	10	FilterBank	7	110	1	5	482	647	18	0	0	0.0207852193995381	0.0278207109737249	0	0	0	0.0224089635854342	1.39713269894217	3.03652950474944	24.8475411827018	16.0287107053496	-0.190150922765738	3.15169851550342	-0.0068421382455759	0.130454216073296	0.317729015570879	5.68656018683997	-0.00913904993181171	0.135306596791818	32.1277995479885	0	24.8475411827018	8.20697424086344	0.0046189376443418	74.4705882352941	129.165676562406	32.1277995479885	59.9796437659033	73.8487118210459
fb_rec20p_per1	2	20	10	FilterBank	7	110	1	3	415	473	11	0	0	0	0.0232558139534884	0	0	0	0	1.21527944181486	1.34225875272629	31.1736590713905	16.4741465057093	-0.178224508996732	2.00727062407058	0.00228903703624663	0.141719302479818	-0.175469399495786	2.69009059649777	-0.00344856170804126	0.142632348994101	39.3801041615576	0	31.1736590713905	6.21254570627365	0.00852272727272727	44.4915254237288	75.8397848370005	39.3801041615576	53.3753943217666	45.1212265884605
fb_rec20p_per1	2	20	10	FilterBank	7	110	1	5	526	623	21	0	0	0.0223713646532438	0.0337078651685393	0	0.0769230769230769	0	0.0195530726256983	1.19018107188028	1.49761126577925	23.5854458158601	16.1558492905556	-0.0137165924870337	2.77488958109686	0.00386671657831983	0.12644890519494	0.0454259651908241	4.1757033188559	0.00361633746555146	0.130673813357746	31.2498192299654	0	23.5854458158601	6.45726332946333	0	43.2686084142395	63.09167792462	31.2498192299654	47.0968801313629	44.1203358343762
fb_rec20p_per1	2	20	10	FilterBank	7	110	1	6	506	750	17	0	0	0.01440329218107	0.0226666666666667	0	0.0285714285714286	0	0.0151133501259446	0.857818640476209	0.938599442513612	24.8807528773576	16.7423586987364	0.125610678915157	2.40816046707628	-0.000531962575965785	0.14182758006246	0.0641818965651324	1.51872440079001	-0.00768411163024756	0.131093150330722	34.2190857988792	0	24.8807528773576	4.96922097103756	0	43.3582887700535	76.9522181638331	34.2190857988792	49.4650178978197	43.3039954086982
fb_rec20p_per1	2	20	10	FilterBank	7	110	1	5	362	363	3	0	0	0.0068259385665529	0.00826446280991736	0	0.032258064516129	0	0	1.12372842864848	2.0805048103942	29.0511384123872	15.7157144816978	0.0923493545108795	1.72579265513434	0.00760001129548801	0.150459866891348	0.0421112864473034	1.65667693724759	0.00383007949483872	0.155801304286508	34.6319026509469	0	29.0511384123872	8.06534101273258	0	36.5260273972603	96.2473205384097	34.6319026509469	38.980694980695	62.9926445649218
fb_rec20p_per1	2	20	10	FilterBank	7	110	1	5	538	670	8	0	0	0.00760456273764259	0.0119402985074627	0	0	0	0.00894854586129754	0.97542267921232	1.09291460575292	27.5736319385458	15.707716257381	-0.0180818232421382	1.6665245046699	0.00377935755783231	0.152151328014253	-0.0193406815852929	6.07441499419741	0.00337977630319297	0.150581184343369	33.1881584303859	0	27.5736319385458	8.63148016255653	0.00190114068441065	1.7910447761194	125.787461300527	33.1881584303859	30.7080745341615	83.448021420912
fb_rec20p_per1	2	20	10	FilterBank	7	110	1	3	370	444	12	0	0	0.00352112676056338	0.027027027027027	0	0.03125	0	0	0.727069780338647	0.386403133800787	23.5143477019291	16.7071546136816	-0.0954154797670993	1.77705174041084	-0.0066576857389211	0.131146945732129	0.0188566250100404	0.946183784119273	0.00587928959417376	0.135405493339058	33.4320744315577	0	23.5143477019291	5.45825551755532	0.0105633802816901	27.2402745995423	103.878764144995	33.4320744315577	41.968253968254	55.1275141184099
fb_rec20p_per1	2	20	10	FilterBank	7	110	1	3	335	408	6	0	0	0.00381679389312977	0.0147058823529412	0	0.0294117647058824	0	0	0.853123361353641	0.705150919721638	27.3452562293416	16.819938402075	0.0050774088724354	1.56895592806222	0.00405452810544744	0.12791558548498	-0.0285166846714086	1.31691341518971	-0.00475093814180991	0.130463193490526	37.8522079884521	0	27.3452562293416	6.7705780380821	0.00763358778625954	13.002457002457	83.6978938347434	37.8522079884521	31.0297872340426	50.9124769139166
fb_rec20p_per1	2	20	10	FilterBank	7	110	1	3	603	723	64	0	0	0.0434056761268781	0.0885200553250346	0	0.186046511627907	0	0.00618556701030928	2.593131768996	9.40136154679213	25.6714672807788	17.1880449938781	-0.090969636856648	4.53251352155295	0.000383931509845994	0.152776131910707	-0.0164954642287337	1.34060103737181	-0.0039396231809242	0.139821365375374	32.4512781998207	0	25.6714672807788	10.6655117115987	0.00333889816360601	4.22033898305085	106.145303702266	32.4512781998207	32.4132841328413	55.1893300577743
fb_rec20p_per1	2	20	10	FilterBank	7	110	1	5	459	577	31	0	0	0.0177383592017738	0.0537261698440208	0	0.0943396226415094	0.025	0.00294985250737463	2.44686909211911	7.18813868819021	28.8133913313766	16.5021567712758	-0.0459162686151316	2.83736455395415	-0.0025227046943366	0.133426846538038	0.325533203381184	5.97099779486622	-0.00744590383186673	0.133228318200323	35.6931802336028	0	28.8133913313766	12.1116892322417	0.0133037694013304	23.170474516696	94.2115583050207	35.6931802336028	46.8237100737101	58.3418331205532
fb_rec20p_per1	2	20	10	FilterBank	7	110	1	3	313	331	21	0	0	0.0131004366812227	0.0634441087613293	0	0.0571428571428571	0.0294117647058824	0	1.97957373780786	4.59387572409067	27.8235974573949	17.7525618937815	0.0547809924403138	2.4613386173541	0.0103712978336839	0.325051188087905	0.27275909744041	3.42547131036403	0.00365655132060783	0.174935648003353	38.8480108528915	0	27.8235974573949	10.5881387951576	0.00873362445414847	2.625	113.732279270058	38.8480108528915	30.5230769230769	74.9836630369742
fb_rec20p_per1	2	20	10	FilterBank	7	110	1	2	481	635	22	0	0	0.0105263157894737	0.0346456692913386	0	0.0333333333333333	0.0303030303030303	0.00518134715025907	1.75974647242122	4.21053041208603	27.8624505106678	15.2144526443075	-0.149369620116104	2.3610370653352	-0.00156908933597239	0.134620468254142	-0.0923319649957015	2.76792300784924	-0.00400955011670046	0.140076497550307	34.6903630466417	0	27.8624505106678	10.1365116273557	0.0126315789473684	68.368253968254	131.210401340138	34.6903630466417	67.2407407407407	76.631261650159
fb_rec20p_per1	2	20	10	FilterBank	7	110	1	5	435	661	23	0	0	0.00467289719626168	0.0347957639939486	0	0.0208333333333333	0	0	1.40367968421484	2.74428069497225	28.9818356039122	16.3753725022517	0.0173281674521373	1.52868058707417	0.00344153874429082	0.152181892061945	-0.0232271125416014	2.51940123714555	0.00377081854128725	0.157440420810823	38.2755668755445	0	28.9818356039122	5.74534674519114	0.00467289719626168	2.9726443768997	126.864790425152	38.2755668755445	32	73.0523542717582
fb_rec20p_per1	2	20	10	FilterBank	7	110	1	2	496	602	21	0	0	0.0221729490022173	0.0348837209302326	0	0.0645161290322581	0	0.019774011299435	1.70739708258187	4.34176622518706	26.3015883323875	15.5543690901807	-0.253278376986084	2.59575988078885	0.0085514731999312	0.165002656117846	-0.0483516491706467	7.83643219476406	0.0142081280264111	0.177084626401428	32.5795787475381	0	26.3015883323875	7.38601393794212	0.00221729490022173	27.7710437710438	76.8706767736826	32.5795787475381	46.8201995012469	53.6704873832919
fb_rec20p_per1	2	20	10	FilterBank	7	110	1	3	374	602	62	0	0	0.0377358490566038	0.102990033222591	0	0.15625	0.0930232558139535	0.0133333333333333	1.89677306156443	4.65075830917079	19.0897708107575	17.8250563030786	0.279962952497602	6.24960842016717	0.0053036356151027	0.24144812854931	-0.865524159158389	7.64476708212175	-0.0171518939467142	0.143477974482793	31.9331974703845	0	19.0897708107575	8.85564372793256	0.0471698113207547	35.1821305841924	87.3350985524749	31.9331974703845	47.9259259259259	55.2412255986872
fb_rec20p_per1	2	20	10	FilterBank	7	110	1	5	444	492	23	0	0	0.0192307692307692	0.0467479674796748	0	0.121212121212121	0	0.00943396226415094	1.67881050612143	3.69305216492936	26.2453911138772	15.7222043452696	-0.0670504197094225	2.21689473769277	0.012543584512303	0.157223522136467	-0.0457656697867244	2.33628545447551	0.0188474535753806	0.155697425769133	29.9701686685429	0	26.2453911138772	7.13461202348373	0.0120192307692308	21.8973305954825	61.4650837101307	29.9701686685429	26.8376963350785	42.5007005399351
fb_rec20p_per1	2	20	10	FilterBank	7	110	1	7	551	967	43	0	0	0.0146788990825688	0.0444674250258532	0	0	0.0224719101123595	0.0141843971631206	1.94179109759566	6.649374994249	23.8464196171123	16.8573614769673	0.018993005178972	3.2780238738735	0.00103379206762839	0.140628093220716	-0.146112649701698	3.08055887698321	0.00372320245306403	0.146854689069275	34.2480434062502	0	23.8464196171123	7.0056344536886	0.0018348623853211	13.4572025052192	67.6493335942013	34.2480434062502	26.2241014799154	52.2311567928751
fb_rec20p_per1	2	20	10	FilterBank	7	110	1	6	465	768	18	0	0	0	0.0234375	0	0	0	0	1.31008215938059	3.00794832425261	26.2214980093721	16.2755663988301	-0.0319548573541203	1.97910001136624	-0.0146355149892643	0.141091089142117	0.00706679061997928	0.868295271425785	-0.0106431024463877	0.139811635353025	40.2266058165212	0	26.2214980093721	6.51722953079619	0	62.282722513089	105.098461804035	40.2266058165212	76.6298342541436	59.9390363829861
fb_rec20p_per1	2	20	10	FilterBank	7	110	1	3	325	354	12	0	0	0.00393700787401575	0.0338983050847458	0	0	0.0175438596491228	0	1.02825370628265	1.59002474618658	27.6874175599511	18.0757331401639	0.3952123708351	2.29248203385059	-0.00498964833233144	0.136492186058851	0.0278612986723319	0.900255432734527	-0.00822053304870123	0.142812064762089	38.8034116300542	0	27.6874175599511	5.19552094459831	0.00393700787401575	11.3960113960114	76.3004578607484	38.8034116300542	26.8127853881279	63.4076415749389
fb_rec20p_per1	2	20	10	FilterBank	7	110	1	4	340	544	20	0	0	0.00353356890459364	0.0367647058823529	0	0	0	0.00531914893617021	1.32471816700777	2.08070727449251	23.9148723178343	18.445239269066	-0.0152327497422878	3.71446792979853	0.0164655039991675	0.144758923375108	0.205892651597136	3.09737558729629	0.0199922934971601	0.151661605649326	39.826000109802	0	23.9148723178343	5.76920386797667	0.00706713780918728	-7.70588235294118	106.589252592748	39.826000109802	29.4655172413793	66.4007811765559
fb_rec20p_per1	2	20	10	FilterBank	7	110	1	7	476	636	9	0	0	0.00873362445414847	0.0141509433962264	0	0	0.0169491525423729	0.00835654596100279	1.08573710328031	1.75456952126826	25.6521604819973	16.1156430405871	0.0222090454248007	2.46405289957777	0.000783175239880435	0.141080908891058	-0.479231034810399	8.18473910965919	0.00479867916887287	0.144115127504415	32.3221698486213	0	25.6521604819973	8.35183055518376	0.00218340611353712	7.9746835443038	79.3625913837981	32.3221698486213	30.8164724164724	51.5241807560703
fb_rec20p_per1	2	20	10	FilterBank	7	110	1	1	343	475	8	0	0	0.00324675324675325	0.0168421052631579	0	0	0	0.00495049504950495	1.28840408959337	3.07616202288791	21.3308764863262	14.5836119866947	-0.0129668193108043	2.00548052022835	0.00335063643076783	0.130737342542508	0.0203749278900957	1.43502035818941	0.00959500913238592	0.132364235580718	27.2730395143781	0	21.3308764863262	6.95068789717906	0.00324675324675325	9.50736842105263	68.4086863147754	27.2730395143781	17.3231939163498	42.1905676896353
fb_rec20p_per1	2	20	10	FilterBank	7	110	1	3	417	783	23	0	0	0.0048661800486618	0.0293742017879949	0	0	0.0161290322580645	0.00328947368421053	2.11915021501408	6.18036443035005	24.4575489093601	16.2589465559751	0.104399200247968	2.65905682744848	0.0053232959783086	0.148887748398166	-0.148091700516613	3.93293745404271	0.00942562738892782	0.154435228292771	35.8676262189912	0	24.4575489093601	7.73004293549492	0.0097323600973236	12.4421593830334	83.10480812847	35.8676262189912	33.2307692307692	66.9596444268919
fb_rec20p_per1	2	20	10	FilterBank	7	110	1	4	324	420	22	0	0	0.00749063670411985	0.0523809523809524	0	0	0	0.0106951871657754	1.53500034749591	3.45772785419429	26.1384266981277	17.1185645426924	-0.211416827006004	2.43424555453036	0.00130841085709247	0.155841491776987	-0.0782350569426589	0.983776736645442	0.00207553946224361	0.162220117519861	36.8827654520869	0	26.1384266981277	7.57204668977145	0	39.9612590799032	85.577413148151	36.8827654520869	42.1788617886179	47.008124789766
fb_rec20p_per1	2	20	10	FilterBank	7	110	1	7	457	628	18	0	0	0.00232558139534884	0.0286624203821656	0	0	0	0.0029673590504451	2.85783614648358	9.83601852854474	28.7186550446869	17.9001139100207	0.124309583197355	3.31958794947371	-0.00223850017554347	0.12611576174585	0.029766564446157	0.905460942774052	0.00102624919602186	0.126154595931527	39.9198640261575	0	28.7186550446869	10.0121923440363	0.00232558139534884	57.3762057877814	95.2832033314923	39.9198640261575	63.14	58.7377707636722
fb_rec20p_per1	2	20	10	FilterBank	7	110	1	4	352	541	30	0	0	0.0123076923076923	0.055452865064695	0	0.0392156862745098	0	0.0087719298245614	2.45061714230889	8.22900961031019	24.9445695473756	18.8198600107156	-0.277382127155119	5.40318881445022	0.00245340774052378	0.168909718445717	-0.27011052991483	3.68651648677064	0.00120620139833091	0.156882906289498	38.81867008131	0	24.9445695473756	10.0464626021962	0	48.8838095238095	121.73282840786	38.81867008131	50.9189189189189	75.3317196129509
fb_rec20p_per1	2	20	10	FilterBank	7	110	1	2	248	300	27	0	0	0.00613496932515337	0.09	0	0	0.0294117647058824	0	1.54974391280279	2.75970226340256	23.2440647973337	17.8552417456722	0.132526726878308	3.32575853479099	-0.0124489355121439	0.151590364964974	-0.240481546409941	1.38186170107739	-0.0122307494716454	0.173115038742271	36.565224450705	0	23.2440647973337	8.29316048277731	0.0429447852760736	3.53741496598639	109.733793433387	36.565224450705	27.4991181657848	77.6953973195854
fb_rec20p_per1	2	20	10	FilterBank	7	110	1	5	435	602	16	0	0	0.00938967136150235	0.026578073089701	0	0	0	0.0118343195266272	1.27549507092045	2.33806380577287	24.6530082083622	14.486389583866	0.0848962947702944	1.60137471014217	-0.00246403064399536	0.146066714034782	-0.443870933974137	5.16500632510903	0.00145133307833362	0.145581413481476	29.9041497330386	0	24.6530082083622	8.6506963249801	0.00704225352112676	-5.3758389261745	101.169562401139	29.9041497330386	13.1088082901554	72.4182195280653
fb_rec20p_per1	2	20	10	FilterBank	7	110	1	3	291	431	30	0	0	0.00819672131147541	0.0696055684454756	0	0	0	0.00666666666666667	2.5788388282194	8.80483363192091	24.6252735149694	17.9734436376877	-0.119520903247957	3.77570527691542	0.0111119064896828	0.211318592308022	0.22430674664854	2.89379770326786	-0.00099036133797763	0.134597265782336	37.2427572177681	0	24.6252735149694	10.804232516073	0.0286885245901639	25.246511627907	112.527933540804	37.2427572177681	45.0854271356784	73.3836448536976
fb_rec20p_per1	2	20	10	FilterBank	7	110	1	3	421	680	40	0	0	0.0318627450980392	0.0588235294117647	0	0	0.0338983050847458	0.0334448160535117	2.99577524974241	11.0219540202685	24.2035171260223	15.8396898852054	-0.136381745559671	3.65638499061816	0.00698279238622417	0.154047223833203	-0.188870239416642	7.29251638996856	0.0149749512205765	0.160758104932339	32.498213592147	0	24.2035171260223	12.6588364292808	0.0196078431372549	8.97897897897898	93.6588089278473	32.498213592147	30.4790697674419	64.1118940153399
fb_rec20p_per1	2	20	10	FilterBank	7	110	1	4	331	487	25	0	0	0.0135593220338983	0.0513347022587269	0	0.0545454545454545	0	0.00483091787439614	2.64341920754784	8.34078111127565	25.200129903804	16.1275102865214	-0.0919058446969717	2.70519633064271	-2.53362081755948e-05	0.150139973004743	-0.0234970602565991	1.06891382087678	0.00454987940478848	0.154106601148584	36.3079867942011	0	25.200129903804	11.6091041168674	0.00338983050847458	4.01663201663202	100.418456418461	36.3079867942011	41.9026217228464	51.3250539065889
fb_rec20p_per1	2	20	10	FilterBank	7	110	1	2	266	370	24	0	0	0.0196078431372549	0.0648648648648649	0	0.0294117647058824	0	0.0186335403726708	2.62480501114071	8.06803390338611	22.3872928593767	17.1702687051342	0.0102947253418025	3.61190788737381	-0.00859315446332841	0.157153972258675	0.81491597650568	10.7354099936564	-0.011613667199024	0.147005939384995	32.2628379015411	0	22.3872928593767	10.5852604493705	0.0509803921568627	12.0659340659341	133.383335158569	32.2628379015411	41.8695652173913	42.8103499541631
fb_rec20p_per1	2	20	10	FilterBank	7	110	1	4	473	623	33	0	0	0.0354430379746835	0.0529695024077047	0	0	0.0222222222222222	0.0402476780185759	2.17748210625163	4.80916802460975	22.8910264527988	16.3604688943017	0.2146845051918	3.47936021330761	-0.00412561360533436	0.212687045781227	0.397898548755554	8.36082466749555	0.00635596591533575	0.156477033162886	29.9670226557218	0	22.8910264527988	9.01348662101257	0.010126582278481	43.4901960784314	81.5862474890195	29.9670226557218	60.348717948718	47.6808496126089
fb_rec20p_per1	2	20	10	FilterBank	7	110	1	1	261	196	13	0	0	0.0131578947368421	0.0663265306122449	0	0.0238095238095238	0	0	2.14446494987372	5.59361657140735	24.3459319962325	16.3687182860631	-0.213935740381119	4.23100755928035	-0.0259508953737291	0.230568934257046	0.356760465862555	3.41585035776086	-0.0173509393434883	0.106449849142603	30.5691635413761	0	24.3459319962325	9.21504445108776	0.0460526315789474	10.0618556701031	109.511379628061	30.5691635413761	18.453781512605	47.9833565600138
fb_rec20p_per1	2	20	10	FilterBank	7	110	1	3	226	190	20	0	0	0.0431034482758621	0.105263157894737	0	0.0833333333333333	0.0465116279069767	0	1.79494226333903	3.7391417980475	20.5214528995191	20.9449204240387	0.670119322953478	7.14914617626428	-0.0208878849421896	0.186036655690946	0.512901076093788	5.54994114726086	-0.00565103790301472	0.146657670135762	34.9869963864721	0	20.5214528995191	11.7683252833635	0.00862068965517241	34.4432432432432	122.480159308383	34.9869963864721	60.6661379857256	108.025479867558
fb_rec20p_per1	2	20	10	FilterBank	7	110	1	3	486	550	19	0	0	0.00475059382422803	0.0345454545454545	0	0	0	0.00561797752808989	1.28778019272452	1.33920703111898	25.8989739119201	16.4363048509366	-0.245052543598862	3.69679797312705	-0.00299733349629942	0.127957927252689	0.0125348104708435	0.84751676553901	-0.00250333866652669	0.116718662675347	32.3954616563588	0	25.8989739119201	10.4988083101196	0.00475059382422803	47.1925925925926	92.9140681692874	32.3954616563588	60.401055408971	58.459298000341
fb_rec20p_per1	2	20	10	FilterBank	7	110	1	3	369	564	10	0	0	0.00862068965517241	0.0177304964539007	0	0.0227272727272727	0.0338983050847458	0	1.23861345363685	0.970028491337292	24.5756310150425	16.9465257350006	0.14426512555526	2.013163630459	-0.00782455490895245	0.149552146830965	0.0367816071631914	2.67508996665196	-0.0133956788526543	0.1602839516487	36.8033579106303	0	24.5756310150425	14.8180559053812	0.00862068965517241	15.2451499118166	79.2021714661347	36.8033579106303	29.6421052631579	53.8286108650867
fb_rec20p_per1	2	20	10	FilterBank	7	110	1	3	327	364	9	0	0	0.00740740740740741	0.0247252747252747	0	0.0232558139534884	0	0.00632911392405063	1.5391814292645	2.32938672844877	27.6492271081808	17.416654796148	0.204535728552539	2.56750286973563	0.00178504199737901	0.142697346399253	0.638497457652358	6.98794684008584	-0.0127289604318376	0.149087910703436	36.8970935576455	0	27.6492271081808	13.4626696365587	0.0037037037037037	46.3204419889503	96.9025387626179	36.8970935576455	54.2702702702703	82.4267612329117
fb_rec20p_per2	2	20	10	JAR_FilterBank	7	110	1	4	351	493	24	0	0	0.0126182965299685	0.0486815415821501	0	0.027027027027027	0.0350877192982456	0	1.79918906713011	4.34473473875677	25.1725286561712	17.5205001645878	0.0794418230674267	3.40615430934245	0.00597724142992891	0.156755628669753	0.0248975718222319	1.03851025661484	0.00767110340086237	0.147450199096147	36.5651850761631	0	25.1725286561712	8.845040524213	0	43.2780082987552	89.0893259469846	36.5651850761631	62.1915708812261	49.9110910079089
fb_rec20p_per2	2	20	10	JAR_FilterBank	7	110	1	4	334	512	22	0	0	0.00946372239747634	0.04296875	0	0.0217391304347826	0.0222222222222222	0	1.99935705861461	4.99930784706388	24.2111030140065	16.9889841694978	0.2480356831549	3.43152902659623	0.00664571290948261	0.143755634864577	0.000902984319405839	1.68156002394841	0.00416232108685433	0.139448828969526	35.6986335668095	0	24.2111030140065	9.78313886630085	0.00630914826498423	13.6	105.895006402343	35.6986335668095	32.266577540107	69.0636776490909
fb_rec20p_per2	2	20	10	JAR_FilterBank	7	110	1	7	377	463	7	0	0	0.00842696629213483	0.0151187904967603	0	0.0217391304347826	0.0163934426229508	0.00398406374501992	1.5406451542899	1.91867943180097	33.0509477099583	15.8999767944937	0.0750161001761457	1.2387337221744	0.0124957286557988	0.158809829439942	0.00514374838779303	1.60530357606479	0.0169952422028848	0.159552468253856	40.0323925177123	0	33.0509477099583	11.7358261104781	0.00280898876404494	-10.1287553648069	137.711684753282	40.0323925177123	20.3396226415094	92.0920421616879
fb_rec20p_per2	2	20	10	JAR_FilterBank	7	110	1	3	415	607	21	0	0	0.0172839506172839	0.0345963756177924	0	0.137931034482759	0.0126582278481013	0.00743494423791822	1.67595861474498	3.35942566783215	25.9697637025431	15.8469713411551	-0.169215895703096	3.01926004717894	0.0058650888797783	0.160643878666446	-0.197839770560761	4.32288114860885	-0.00199424279183408	0.152490127402394	33.8317491134579	0	25.9697637025431	10.5021578655008	0.00740740740740741	28.4717607973422	87.6350967530573	33.8317491134579	40.3740211883924	48.4080495610368
fb_rec20p_per2	2	20	10	JAR_FilterBank	7	110	1	4	337	501	15	0	0	0.010752688172043	0.029940119760479	0	0.0217391304347826	0	0.0101522842639594	1.81628222694702	4.59250285908352	20.4523317510738	15.3015929524202	0.312541294900634	2.17367806057001	0.00442940808270312	0.150801038208858	0.525526348553947	4.88417450610929	0.00188539995723054	0.165631596698651	29.0305473299211	0	20.4523317510738	10.5455182895946	0.003584229390681	-15.7732793522267	122.389252064334	29.0305473299211	2.66129032258065	83.0344435724173
fb_rec20p_per2	2	20	10	JAR_FilterBank	7	110	1	2	243	323	2	0	0	0.00552486187845304	0.00619195046439629	0	0.0196078431372549	0	0	1.09454356282817	1.54112537532519	23.1385880641862	15.1119611671134	-0.0105174323720103	2.08390676435627	0.000135331143652713	0.170416487411779	0.153572155823265	2.85147134407452	-0.00575951906318782	0.163013677343899	35.9150858084951	0	23.1385880641862	7.79329950257372	0.0165745856353591	94.2592592592593	150.049674150803	35.9150858084951	98.4397163120567	106.069274452011
fb_rec20p_per2	2	20	10	JAR_FilterBank	7	110	1	4	320	313	19	0	0	0.0210084033613445	0.060702875399361	0	0.0666666666666667	0.0222222222222222	0.00641025641025641	1.87838224940572	5.12667692084434	30.6786244895255	18.8232897919341	0.137167680217477	3.51871274674206	-0.0162131562240664	0.128523539435917	0.502072927869036	6.28272441651326	-0.0100780146833623	0.133160279989568	40.9625427185733	0	30.6786244895255	13.2687129600208	0	46.2910216718266	111.381397299912	40.9625427185733	52.0099502487562	78.2274881387451
fb_rec20p_per2	2	20	10	JAR_FilterBank	7	110	1	5	397	752	33	0	0	0.0156657963446475	0.0438829787234043	0	0.130434782608696	0	0	1.48651776416155	2.95401248479928	24.6533712112121	17.2558122328538	0.169975933357462	3.3712252999514	0.00755416099222035	0.158464475627439	0.0873665406183602	1.45657530901874	0.00192318100999735	0.160296431277033	39.9105271747617	0	24.6533712112121	7.20883053043447	0	37.0613333333333	118.67053481242	39.9105271747617	49.993993993994	83.6542653329616
fb_rec20p_per2	2	20	10	JAR_FilterBank	7	110	1	2	305	268	3	0	0	0	0.0111940298507463	0	0	0	0	0.436752625934831	0.11371053086303	28.1244920658512	16.7323052064798	0.0405251886209691	1.34078650193598	-0.00478589916310632	0.157890303933202	0.00941372402539452	0.836846899974283	-0.00343911392898961	0.154965588748096	36.8483606426629	0	28.1244920658512	5.05294230788001	0	84.8507462686567	133.123327544498	36.8483606426629	81.2	92.005505366535
fb_rec20p_per2	2	20	10	JAR_FilterBank	7	110	1	4	449	415	5	0	0	0.0116279069767442	0.0120481927710843	0	0	0	0.013986013986014	0.580561419569482	0.331687265904396	26.8522970721999	15.1392747612246	-0.0848216836110572	1.69625172092894	-0.0121094205392151	0.148145185152228	-0.427151051136207	6.54119965186776	-0.0148586909551714	0.152773908902206	31.2447620041837	0	26.8522970721999	5.29704196013069	0	10.8653846153846	79.4265055686052	31.2447620041837	30.5384615384615	58.9120424109867
fb_rec20p_per2	2	20	10	JAR_FilterBank	7	110	1	4	381	491	16	0	0	0.00266666666666667	0.0325865580448065	0	0.0185185185185185	0	0	2.26952412850954	5.71257003677544	26.0149704861533	15.9928050226869	0.16130669224264	2.28596046622525	-0.00228761930166587	0.142105874189001	-0.0461150718276465	0.855271702877572	0.00052970303704482	0.13381363045971	32.999275767668	0	26.0149704861533	11.2912328087523	0.00533333333333333	66.7555555555556	152.930890045159	32.999275767668	50.8433734939759	74.6424276825011
fb_rec20p_per2	2	20	10	JAR_FilterBank	7	110	1	1	299	259	25	0	0	0.0355329949238579	0.0965250965250965	0	0.0208333333333333	0.0909090909090909	0.028169014084507	2.43598354896468	8.86590398644448	21.836164440896	15.7870478624544	-0.0207358776375719	2.76311174900794	0.00402619667586439	0.136036392676222	0.322508297510635	9.64496817214347	0.00231149436095011	0.198867580458612	28.0596402492942	0	21.836164440896	11.9996049068334	0	48.4094488188976	108.429052181633	28.0596402492942	37.7988165680473	72.829757448585
fb_rec20p_per2	2	20	10	JAR_FilterBank	7	110	1	4	281	345	11	0	0	0.00431034482758621	0.0318840579710145	0	0	0.027027027027027	0	0.945314436748391	0.855064114749097	27.7930735482611	17.3426084834223	0.112514973492632	2.10922072250208	-0.00745367813797264	0.166893644988787	0.163973404429815	1.89137323752351	-0.00795200575886526	0.176000178933418	37.6120259599489	0	27.7930735482611	7.0659275678771	0.00431034482758621	-13.6484149855908	111.816544458021	37.6120259599489	23.2815533980583	52.9587814825055
fb_rec20p_per2	2	20	10	JAR_FilterBank	7	110	1	4	400	359	11	0	0	0.00338983050847458	0.0306406685236769	0	0	0	0.00425531914893617	1.07984698915407	1.2689002891558	30.1617555500878	15.6326027191335	-0.104773349608253	2.20661722309145	-0.0171049733519469	0.140677119773704	0.225443870536041	3.76579593726257	-0.0144208151629931	0.139892579430056	36.2634639850163	0	30.1617555500878	6.05071481065192	0	21.7111111111111	118.028394151831	36.2634639850163	48.0579710144928	84.4403839719055
fb_rec20p_per2	2	20	10	JAR_FilterBank	7	110	1	5	425	602	18	0	0	0.0102040816326531	0.0299003322259136	0	0.0232558139534884	0	0.00996677740863787	1.58411782754196	3.36081892974218	25.1213216401574	15.6194876424263	0.156613934596074	2.29539400527742	0.00223177250704618	0.152348259838814	0.0699943877295356	1.36448503068725	-0.00360321757034739	0.156951578590284	34.0710618542872	0	25.1213216401574	10.4824355620087	0.00510204081632653	44.9106239460371	122.397035209834	34.0710618542872	64.0307262569832	81.3989838478334
fb_rec20p_per2	2	20	10	JAR_FilterBank	7	110	1	3	341	389	7	0	0	0.00321543408360129	0.0179948586118252	0	0	0.0232558139534884	0	1.74410587760908	5.12919128154605	30.0767469647319	17.8004952901094	-0.0740155088728298	2.73013727912464	0.00961832903064367	0.118546971260144	-0.0593284894254188	1.08725093275716	0.015831643452818	0.119192687012356	41.6583822123202	0	30.0767469647319	9.4300766670239	0.0160771704180064	35.7634961439589	93.0047421699345	41.6583822123202	52.9781659388646	52.6253262201705
fb_rec20p_per2	2	20	10	JAR_FilterBank	7	110	1	4	355	465	33	0	0	0.0125391849529781	0.0709677419354839	0	0	0.0526315789473684	0.00471698113207547	2.673377271964	9.13245152310305	24.1393198328901	18.1191254726359	0.0365835735254248	4.91945793847525	-0.00899198108825945	0.150152997853561	0.131140984774988	3.83407403851982	-0.0073425709364572	0.137294770943728	34.2384085477714	0	24.1393198328901	10.6461778300361	0.0219435736677116	27.2589285714286	87.8509257492576	34.2384085477714	43.7153024911032	62.6247675843788
fb_rec20p_per2	2	20	10	JAR_FilterBank	7	110	1	4	462	569	32	0	0	0.0114678899082569	0.0562390158172232	0	0.0185185185185185	0.0540540540540541	0.00571428571428571	2.7691631203073	9.37325498505075	27.1736882513864	17.3327141927212	-0.0846764538175683	4.43501119595717	0.00106571293234698	0.16652695320467	0.118886391902494	12.8898681546853	-5.17408422971028e-05	0.364545746011223	34.7041727470849	0	27.1736882513864	13.456964239626	0.00458715596330275	59.4829443447038	114.810659645756	34.7041727470849	72.9328320802005	71.9575101436938
fb_rec20p_per2	2	20	10	JAR_FilterBank	7	110	1	3	343	468	12	0	0	0.00664451827242525	0.0256410256410256	0	0.0454545454545455	0	0	1.54363705197201	2.39198582170485	28.4781482213624	17.5932582574253	0.0337515788415733	2.9447209115252	0.000584133389977551	0.135273554020645	-0.0190408931142045	0.891177248172947	0.00379458776329834	0.130337060974875	41.7704695436472	0	28.4781482213624	8.71628849063577	0.00332225913621262	6.32258064516129	87.8873153545065	41.7704695436472	26.8171206225681	54.1107228813227
fb_rec20p_per2	2	20	10	JAR_FilterBank	7	110	1	3	371	449	12	0	0	0.00383141762452107	0.0267260579064588	0	0	0.0217391304347826	0	2.11353643403367	5.05066843577179	27.0132047662049	18.4044779207145	0.131564483875937	3.85983094610677	0.00438021540848828	0.144166706371199	0.00919473615328026	0.803136243658807	0.00225232966576053	0.151663712004763	41.2598897592948	0	27.0132047662049	8.57800618191959	0.0153256704980843	35.6241610738255	63.5144286255745	41.2598897592948	43.6287349014622	45.990363379706
fb_rec20p_per2	2	20	10	JAR_FilterBank	7	110	1	1	364	543	15	0	0	0	0.0276243093922652	0	0	0	0	1.1675800254635	1.61152078119306	27.1510018912929	17.4595081323364	0.0653391519567686	2.72321540350441	-0.01132306646232	0.153751761475464	0.0182437566299512	2.60120491733912	-0.0090722176317748	0.157555745428819	37.6975182453771	0	27.1510018912929	7.33056872112252	0.0118343195266272	19.8870056497175	81.2217233273354	37.6975182453771	38.8885041551247	64.1881089000312
fb_rec20p_per2	2	20	10	JAR_FilterBank	7	110	1	6	458	609	19	0	0	0.00696055684454756	0.0311986863711002	0	0.0294117647058824	0.0289855072463768	0	1.57571952944467	3.24570247177375	29.3573057038653	18.0489502229834	0.0219639929882928	3.30592242436123	0.00385166017784628	0.144375723897427	-0.0856398269892655	3.1884413488925	-0.00351687848595779	0.141286065429654	39.8769034015252	0	29.3573057038653	8.2016476165241	0	40.6589018302829	76.346699065024	39.8769034015252	50.6709226326189	60.2608480335434
fb_rec20p_per2	2	20	10	JAR_FilterBank	7	110	1	5	415	531	7	0	0	0.00247524752475248	0.0131826741996234	0	0.0175438596491228	0	0	1.76476453873448	5.30928741101804	29.5902764269214	14.9431369549316	-0.0435909325309102	1.16254557586634	0.00014088552924515	0.136716340456295	-0.0720675223216257	0.982227588173541	0.00298360974340768	0.134755942795394	36.5296659626614	0	29.5902764269214	8.82478646730514	0.00742574257425743	54.7396226415094	109.179497614205	36.5296659626614	60.4077134986226	61.052727379275
fb_rec20p_per2	2	20	10	JAR_FilterBank	7	110	1	3	291	338	10	0	0	0.0119047619047619	0.029585798816568	0	0	0.0208333333333333	0	1.8007574670035	5.91380552655977	25.7510815656915	16.4710434562389	-0.00463863441294144	1.48922386414836	0.00618616139433533	0.133681817482383	-0.11810968595176	2.45468956563526	0.0102067579667525	0.126519445561887	34.1394113496763	0	25.7510815656915	9.21666525570691	0.00793650793650794	47.6213017751479	111.541020206939	34.1394113496763	48.3137254901961	55.1567368821868
fb_rec20p_per2	2	20	10	JAR_FilterBank	7	110	1	1	214	212	17	0	0	0.02	0.080188679245283	0	0.0232558139534884	0.0333333333333333	0	1.28039514813441	1.59912656451743	17.0459810253352	17.4586948903696	0.386141989734518	4.66066188605206	0.00855823195382448	0.160609741505314	2.66185436001906	21.4678577662649	-0.00497798198664222	0.111127282978271	31.830055578874	0	17.0459810253352	9.83959895353332	0.04	-5.04433497536946	142.749011215129	31.830055578874	21.7777777777778	88.1399994225544
fb_rec20p_per2	2	20	10	JAR_FilterBank	7	110	1	4	367	487	15	0	0	0	0.0308008213552361	0	0	0	0	1.3400676397615	2.25626588370556	28.1290863894004	18.0623865593643	-0.0243258246649837	2.55359784286337	0.00331127297120948	0.13981287603299	-0.0252619887591675	1.16093483509518	0.00576982830285705	0.136361761338857	40.0048640492394	0	28.1290863894004	7.10332192379278	0.00946372239747634	5.05833333333333	86.5547284439479	40.0048640492394	30.5505226480836	54.039774830322
fb_rec20p_per2	2	20	10	JAR_FilterBank	7	110	1	3	460	612	47	0	0	0.0531400966183575	0.076797385620915	0	0.0277777777777778	0.0227272727272727	0.0602409638554217	2.80951326969173	10.2389267252676	19.9245252586013	17.4183496872936	0.346478902940132	5.50583141881384	0.000294836065143077	0.163467105603107	1.09778278505366	19.541869512701	-0.00682869521540758	0.157036856009586	27.5640715811436	0	19.9245252586013	12.0965409701126	0.0120772946859903	23.3840947546531	73.4492539045617	27.5640715811436	18.5617515638963	53.5271109216101
fb_rec20p_per2	2	20	10	JAR_FilterBank	7	110	1	4	364	434	22	0	0	0.0146627565982405	0.0506912442396313	0	0.0444444444444444	0.0416666666666667	0.00446428571428571	2.3487024664742	6.3401029247387	29.9530923981175	17.4711405680481	0.168558909313057	2.52980470975921	0.0117154685244851	0.248416580381347	0.161590742751584	2.55345711013295	-0.000223617845626461	0.153672309636229	38.5120710890388	0	29.9530923981175	8.84844117410954	0.00879765395894428	58.6666666666667	93.1911970933217	38.5120710890388	59.7986104050161	70.6351187327242
fb_rec20p_per2	2	20	10	JAR_FilterBank	7	110	1	5	333	582	21	0	0	0.00634920634920635	0.0360824742268041	0	0.0178571428571429	0.0204081632653061	0	2.21424618413683	6.2702915290073	24.8083196734084	17.2067108738319	0.0510134141860072	3.13699139387929	0.00785068150548858	0.146234496753004	-0.163455912789468	3.5497846655848	0.00895440160834944	0.153896281327074	38.7693218050307	0	24.8083196734084	10.6016493498979	0.0158730158730159	38.0589254766031	116.330482866626	38.7693218050307	48.6132334581773	68.9769402557184
fb_rec20p_per2	2	20	10	JAR_FilterBank	7	110	1	6	536	880	35	0	0	0.0188323917137476	0.0397727272727273	0	0.0232558139534884	0.0625	0.0136986301369863	2.62228400965919	8.64934001684298	25.1593750706069	16.6718770966272	-0.0121027525822458	3.03136057421266	-0.00383152456540542	0.1428996078466	1.1655491956888	13.0787398405784	-0.00945725568006823	0.201858894428151	34.2373471021439	0	25.1593750706069	11.2309225704993	0.00376647834274953	46.8050749711649	95.0777125786071	34.2373471021439	48.3988724453841	73.4263609909144
fb_rec20p_per2	2	20	10	JAR_FilterBank	7	110	1	5	471	749	45	0	0	0.0133037694013304	0.0600801068090788	0	0	0	0.0165289256198347	1.76510461938742	4.5337773613649	21.5518505988168	18.2979930213187	0.076572455084881	5.01211832933386	0.00179483706192982	0.131416911910366	-0.384982725533305	4.90654427447896	0.000504797166042571	0.122504028010291	32.0734553931525	0	21.5518505988168	5.97035299226717	0.00221729490022173	32.4059539918809	80.4121346614819	32.0734553931525	40.2487562189055	52.5664316518038
fb_rec20p_per2	2	20	10	JAR_FilterBank	7	110	1	3	474	747	34	0	0	0.0187353629976581	0.0455153949129853	0	0.0238095238095238	0	0.0202312138728324	1.35731913745052	1.89939417944898	22.8607295302793	16.1965488450866	-0.132240696118092	3.26861923107386	0.00485440184567566	0.16117601339564	-0.31699306320971	6.79135528824875	0.00862988762391788	0.142418589023864	33.8326083010733	0	22.8607295302793	7.0593792500305	0.00468384074941452	46.907133243607	94.4579128186826	33.8326083010733	60.3630026809652	67.1718548938794
fb_rec20p_per2	2	20	10	JAR_FilterBank	7	110	1	4	457	487	13	0	0	0.00769230769230769	0.026694045174538	0	0.0714285714285714	0	0	2.21823079825315	5.61913471369453	30.2041725920028	14.3642570328077	0.0107103501751171	1.9680752401727	-0.00143831659915167	0.136164081146735	0.00282686517714221	0.935688677387327	-0.0014450926795412	0.138889755101882	36.2828169651068	0	30.2041725920028	10.6849848446737	0.00769230769230769	62.455114822547	99.0329050697058	36.2828169651068	82.0777777777778	54.6171741899601
fb_rec20p_per2	2	20	10	JAR_FilterBank	7	110	1	1	209	240	20	0	0	0.0296296296296296	0.0833333333333333	0	0.0357142857142857	0.0476190476190476	0	1.84932645768054	4.26496254571016	21.5235470638584	17.7789932581498	0.0640071913179382	5.63908056507275	-0.00162741272575511	0.122083757236768	0.31873857356071	4.22401672136844	0.0182875436353057	0.129361109294636	36.2481768606165	0	21.5235470638584	15.3906910055548	0.0444444444444444	-28.017094017094	142.02870911537	36.2481768606165	33.9405940594059	84.5044166635305
fb_rec20p_per2	2	20	10	JAR_FilterBank	7	110	1	4	480	588	9	0	0	0.0119047619047619	0.0153061224489796	0	0	0	0.0147492625368732	0.90438209634656	0.336019888647939	26.8155858712814	16.6319546475198	0.128740028042104	2.09079740895545	-0.00829053736715428	0.150794929696272	-0.622143951578009	6.66286595050987	-0.0132243989249449	0.145620990165865	34.5981312411349	0	26.8155858712814	4.27089888032721	0	25.6054888507719	65.4685630919596	34.5981312411349	39.7968586387435	51.7173723644113
fb_rec20p_per2	2	20	10	JAR_FilterBank	7	110	1	3	387	505	5	0	0	0.00588235294117647	0.0099009900990099	0	0.0256410256410256	0	0.00401606425702811	1.39759369086901	1.72641725036725	29.259241819349	16.5769692569041	0.0579704060613163	2.00685329547839	0.004634420712669	0.153942227201101	-0.087469394221959	1.58310697022201	0.00635172024289946	0.152127043459711	39.7949607784218	0	29.259241819349	8.55616464329036	0.00882352941176471	28.5099601593625	75.5690778648231	39.7949607784218	33.8745874587459	56.0697069207922
fb_rec20p_per2	2	20	10	JAR_FilterBank	7	110	1	2	347	480	26	0	0	0.0321428571428571	0.0541666666666667	0	0.0333333333333333	0	0.027027027027027	0.79205739431334	0.291902349874636	16.5627266135929	14.426936963448	0.113202307902832	4.98495638326929	-0.00330062020702887	0.147680250725119	-0.413837920599938	9.74787861326899	-0.010406227028812	0.151032921464909	24.2835291024089	0	16.5627266135929	8.26890330319597	0.00357142857142857	-6.839248434238	116.421203820505	24.2835291024089	13.1612903225806	63.8834063410427
fb_rec20p_per2	2	20	10	JAR_FilterBank	7	110	1	5	413	470	2	0	0	0.00293255131964809	0.00425531914893617	0	0.03125	0	0	0.510048842758418	0.219661559688113	28.7279312438067	16.1461901939013	-0.0421610561690871	1.32932450517762	-0.00658534987973306	0.129515902110786	-0.0232779991964236	1.05848441239735	-0.00414995726755014	0.12535422663837	36.7604442887938	0	28.7279312438067	3.82432816274746	0	-3.98315789473684	113.353781959498	36.7604442887938	28.4	60.0222924027754
fb_rec20p_per2	2	20	10	JAR_FilterBank	7	110	1	6	529	807	20	0	0	0.00795228628230616	0.0247831474597274	0	0	0.0169491525423729	0.00733496332518337	1.63718370714448	2.32753817399891	27.3187670046767	16.3144948578457	0.0483649989652907	1.69143710080551	0.00133674788522709	0.151240396860145	-0.0968397455218218	1.92905032857105	0.00874611283807238	0.149424090784429	37.3406303086523	0	27.3187670046767	6.89158790903916	0.00198807157057654	44.545229244114	72.2876808858661	37.3406303086523	44.2986899563319	58.057689924164
fb_rec20p_per2	2	20	10	JAR_FilterBank	7	110	1	3	243	251	15	0	0	0.0207253886010363	0.0597609561752988	0	0.0217391304347826	0.024390243902439	0	1.28975253923871	2.19998209273054	25.0357292837841	17.6793418353902	0.00172501495303914	1.98424805817447	-0.0104919408157894	0.161210443120584	0.259108241762287	1.93815983652966	-0.00626662338216529	0.168961196017698	33.273413422454	0	25.0357292837841	7.9517728319061	0.0155440414507772	49.4204081632653	128.302436280729	33.273413422454	43.7368421052632	94.2103280879463
fb_rec20p_per2	2	20	10	JAR_FilterBank	7	110	1	2	365	478	34	0	0	0.00949367088607595	0.0711297071129707	0	0	0.0344827586206897	0	2.15004085252223	4.94944905578096	25.8728989390535	19.1611544433851	0.0327998621619655	4.81013646104784	-0.00565799366336076	0.153590566031242	-0.778682268067674	10.3052576349119	-0.00795067256621731	0.194857479629223	38.6347403630413	0	25.8728989390535	11.2930967432338	0.0189873417721519	20.1750547045952	80.7211193753511	38.6347403630413	37.0271698113208	59.295626990675
fb_rec20p_per2	2	20	10	JAR_FilterBank	7	110	1	3	479	626	30	0	0	0.0179028132992327	0.0479233226837061	0	0	0.0285714285714286	0.0136986301369863	2.32881092979305	4.90994012969841	25.9082188041725	18.732704433274	-0.335496287214528	3.73735562686886	-0.00526459641754532	0.15718488397735	-0.093372162073191	2.06840099885658	-0.00952276517129536	0.158274789292078	39.5206853209765	0	25.9082188041725	10.2027033084436	0.0255754475703325	45.5024390243902	67.2280835815994	39.5206853209765	48.489552238806	47.8400439035868
fb_rec20p_per2	2	20	10	JAR_FilterBank	7	110	1	2	365	358	7	0	0	0.003584229390681	0.0195530726256983	0	0.0263157894736842	0	0	0.601166928553566	0.244526818057596	29.6830543564702	15.6744764434165	-0.132897305540405	1.64787142763938	-0.00101524692323309	0.136626276939745	-0.158397140902952	1.20988604447257	0.00209854084254754	0.135216507238115	38.0658853071902	0	29.6830543564702	5.55563477486954	0.017921146953405	62.3687150837989	116.318592361138	38.0658853071902	71.0619469026549	69.2053027108751
fb_rec20p_per2	2	20	10	JAR_FilterBank	7	110	1	5	301	281	10	0	0	0.00423728813559322	0.0355871886120996	0	0.025	0	0	0.676009243860132	0.402715323807019	33.187411225149	14.9086127556835	0.0912323641788558	1.90134188953883	-0.00321265666792782	0.161393431777516	0.0151426247811271	0.905009108331733	0.0139480591799494	0.164393858441985	39.9052255009308	0	33.187411225149	6.26383638835882	0.00423728813559322	1.90545454545455	143.019491574188	39.9052255009308	20.6701570680628	108.195783065391
fb_rec20p_per2	2	20	10	JAR_FilterBank	7	110	1	2	276	208	18	0	0	0	0.0865384615384615	0	0	0	0	1.70721239624396	5.47541342249787	21.6164459356513	21.830325238347	0.283916439415667	8.87705233268074	-0.00413478117247107	0.141808798137893	0.0168340441551647	1.1373203349304	-0.00994157284800696	0.116746367479214	39.4816950667459	0	21.6164459356513	10.189385387284	0.00740740740740741	33.2673267326733	95.0348342617924	39.4816950667459	42.84	69.0724579296586
fb_rec20p_per2	2	20	10	JAR_FilterBank	7	110	1	4	524	867	13	0	0	0.00192678227360308	0.0149942329873126	0	0	0	0.00238095238095238	0.856864326986294	0.529070132785506	26.0122476925467	15.5764689086858	-0.0995881083737484	1.5416441810788	-0.00158478941465229	0.143221432484056	-0.0343494491717981	0.910632036938966	0.00339782523212835	0.13548689830189	37.4416854148591	0	26.0122476925467	4.42415128987722	0	37.2933025404157	64.6157472991133	37.4416854148591	51.8583333333333	37.4200990578639
fb_rec20p_per2	2	20	10	JAR_FilterBank	7	110	1	7	542	740	10	0	0	0	0.0135135135135135	0	0	0	0	1.01361695128963	1.52581033488858	27.2059297828403	16.4237864721873	-0.110774034739533	1.37691463453373	-0.00410127151512067	0.145696112923026	-0.0756607952921625	0.910909747121706	0.00406221042196291	0.146856016347309	35.9309620144756	0	27.2059297828403	5.56052235313848	0	48.8065395095368	80.190517760036	35.9309620144756	50.8720173535792	43.9332856139224
fb_rec20p_per2	2	20	10	JAR_FilterBank	7	110	1	4	533	544	4	0	0	0	0.00735294117647059	0	0	0	0	0.951190170873361	1.23944764197825	31.8077275569775	13.6417179343249	-0.0440053373931253	1.63332201759448	0.0110290044370279	0.144848041686395	-0.00899952769296047	1.13481230904112	0.0100439806715162	0.14536121249496	35.8353571009529	0	31.8077275569775	6.85931453011062	0.00206611570247934	53.3480662983426	54.8181363494069	35.8353571009529	62.2895322939866	45.2808290994384
fb_rec20p_per2	2	20	10	JAR_FilterBank	7	110	1	6	514	662	26	0	0	0.0169133192389006	0.0392749244712991	0	0.08	0	0.00527704485488127	2.98036413131951	9.3796090862328	28.5793105017037	16.1811792518536	0.00054725255096344	2.7169031594011	0.0216189187254979	0.19944117528997	-0.461856306608782	8.76847463076912	0.0198939810136412	0.153125130116248	35.7516354174511	0	28.5793105017037	13.39922404847	0.0126849894291755	44.8	67.8157569265378	35.7516354174511	53.6812865497076	55.0585070373348
fb_rec20p_per2	2	20	10	JAR_FilterBank	7	110	1	3	440	541	34	0	0	0.0229007633587786	0.0628465804066543	0	0.0833333333333333	0.0131578947368421	0.013840830449827	2.81956116170505	9.1947914415791	24.1905961160297	18.0313454557568	-0.315160130640978	3.91223204417389	-0.00896804900441018	0.175905506885401	-0.524902056225045	13.7409541963649	-0.0031664787723027	0.167115587846559	31.658111196891	0	24.1905961160297	12.5997715880997	0.00254452926208651	29.4552380952381	84.1459133243522	31.658111196891	45.9777158774373	51.9545843178416
fb_rec20p_per2	2	20	10	JAR_FilterBank	7	110	1	3	429	537	10	0	0	0.00240963855421687	0.0186219739292365	0	0	0	0	0.79799256265722	0.728195557946935	30.3673666011191	15.6515286279306	0.0138422575954516	1.9546776250508	-0.00513440573039873	0.155835583510828	-0.0237449741672923	0.841725133433468	-0.00923994157702745	0.161266813377873	38.3882465097463	0	30.3673666011191	4.17808835529455	0.00240963855421687	50.4887218045113	64.756605467387	38.3882465097463	57.0134770889488	42.5704799576317
fb_rec20p_per2	2	20	10	JAR_FilterBank	7	110	1	5	372	511	18	0	0	0.0033003300330033	0.0352250489236791	0	0	0	0	1.14947590381388	1.82254595785626	26.287651122034	17.2090465161339	-0.1181458975351	2.89180675289702	0.00224331090341439	0.137034081251803	-0.0273855277207043	1.08374560646092	0.00657523210661298	0.138623105537856	38.21899032374	0	26.287651122034	3.58426302425841	0.0099009900990099	19.4161735700197	78.7128064796739	38.21899032374	44.5736434108527	52.7528228088353
fb_rec20p_per2	2	20	10	JAR_FilterBank	7	110	1	2	240	284	29	0	0	0.0324074074074074	0.102112676056338	0	0.101694915254237	0.0232558139534884	0	1.87463660444747	4.48470564581133	24.9275723221416	17.7608248719016	-0.0389820265605867	4.17701096171065	0.00507295217340248	0.149849070778781	-0.195542572466524	4.2022734190219	-0.0012379124167688	0.153508323978026	34.2164291309157	0	24.9275723221416	10.0372561120778	0.0277777777777778	-26.8243727598566	135.763632862959	34.2164291309157	4.79041916167665	87.4762502939277
fb_rec20p_per2	2	20	10	JAR_FilterBank	7	110	1	4	385	416	42	0	0	0.0521172638436482	0.100961538461538	0	0.0645161290322581	0.0294117647058824	0.0588235294117647	2.28351077980748	6.00752134003084	20.6691989579497	16.9258333231857	-0.129537567735815	5.33165868348808	-0.0030713256211844	0.173133213297813	0.024239400818052	15.244446693562	0.0087647012115377	0.167190344779953	27.4899300135454	0	20.6691989579497	11.9135461125011	0.00651465798045603	10.2643391521197	89.7771683120197	27.4899300135454	25.0096774193548	58.9827716825948
fb_rec20p_per2	2	20	10	JAR_FilterBank	7	110	1	3	351	412	3	0	0	0	0.00728155339805825	0	0	0	0	0.692730394045458	0.634396634248089	30.6208014312497	16.2418014619348	-0.0421174578457835	1.14682036334244	0.00510346585252085	0.120538664047557	-0.0213252681802947	0.959281698071707	0.00719167113663826	0.113044900555885	40.1032679457053	0	30.6208014312497	5.68772399697334	0	68.4164648910412	113.370348172501	40.1032679457053	69.3968253968254	62.9410752531698
fb_rec20p_per2	2	20	10	JAR_FilterBank	7	110	1	3	314	363	5	0	0	0.0037593984962406	0.0137741046831956	0	0.0263157894736842	0	0	1.16324011810307	1.56933974296374	29.0514787160715	17.9097198180986	0.302631046175212	2.79470649592546	0.00776030412788272	0.125890308134202	-0.0736297343135215	3.24117144479646	0.00224869778145395	0.122812369213943	38.5436550716366	0	29.0514787160715	6.73692961103925	0.0037593984962406	35.3	99.1210340300515	38.5436550716366	39.2177777777778	58.9863153352149
fb_rec20p_per2	2	20	10	JAR_FilterBank	7	110	1	4	353	509	20	0	0	0.0032258064516129	0.0392927308447937	0	0	0	0.00448430493273543	1.74441496106586	4.26967041433281	25.1620056681958	17.1236036263627	0.124575518766066	3.40850303897916	-0.00119085445041856	0.149520675946841	0.0149514852986569	1.1803240180195	-0.00412514366879147	0.148222613717202	37.0924944810932	0	25.1620056681958	5.1044104813938	0	12.7827788649706	114.168699467696	37.0924944810932	34.5583038869258	61.7500046798708
fb_rec20p_per2	2	20	10	JAR_FilterBank	7	110	1	4	463	750	35	0	0	0.0131578947368421	0.0466666666666667	0	0	0.0175438596491228	0.0136986301369863	2.57514085049442	9.2750110694477	21.7704757041339	15.7129750080316	-0.00647699105712793	3.52495021354673	-0.00182413738251492	0.148307370830428	0.0184093042101159	3.48479932984608	-0.00585435550317321	0.137212891864258	28.3146695535651	0	21.7704757041339	8.18985776252754	0.00657894736842105	28.9020134228188	91.1968349097352	28.3146695535651	40.053343076361	48.9828457479831
fb_rec20p_per2	2	20	10	JAR_FilterBank	7	110	1	5	386	597	29	0	0	0.00789473684210526	0.0485762144053601	0	0.0363636363636364	0	0.0036101083032491	1.78761740196689	5.16418999083866	26.5649719529948	16.4616618195015	0.103846543026285	2.75231999273833	-0.00277172566165888	0.137639155799397	0.00896151107880689	2.26267042174259	-0.00398889091920503	0.128651262023884	36.7394153255088	0	26.5649719529948	8.69792348993374	0.00526315789473684	14.2071307300509	88.1136666379621	36.7394153255088	32.7314285714286	50.8325176898299
fb_rec20p_per2	2	20	10	JAR_FilterBank	7	110	1	3	378	499	19	0	0	0.0202898550724638	0.0380761523046092	0	0.05	0.0188679245283019	0.0164609053497942	2.24218415863226	6.76631323401554	26.3918509754376	15.8350762030069	0.084874810632962	2.08241978109127	0.002688089965277	0.151974620310594	0.154934280620631	2.3335969688872	-0.00276040409589801	0.15306864153806	35.0099013684932	0	26.3918509754376	10.3752693791969	0.00579710144927536	-0.145748987854251	123.11275118857	35.0099013684932	43.5793795620438	76.7192227726344
fb_rec20p_per3	3	20	6.66666666666667	FilterBank	7	110	1	5	455	503	17	0	0	0.00516795865633075	0.0337972166998012	0	0	0.0181818181818182	0.00328947368421053	1.79873768360314	5.55791056884278	28.7602128434544	17.0577231614885	0.033954556703606	2.44871117971462	0.00173573815709424	0.14878433765954	-0.0467022969064393	1.68873233858731	0.00875721198406389	0.147167664704567	35.8859172215576	0	28.7602128434544	5.29395085776303	0.00258397932816537	21.8130081300813	78.5207276946313	35.8859172215576	38.6609740670462	47.4420316943203
fb_rec20p_per3	3	20	6.66666666666667	FilterBank	7	110	1	1	336	449	43	0	0	0.03125	0.0957683741648107	0	0.0540540540540541	0.0714285714285714	0	3.36126924991183	12.2158752399894	24.0132801559182	19.9818932733171	0.373196099813194	5.99194652146076	0.00112104933546622	0.15330830683918	0.402331290806974	8.28383585859032	0.00197496058008299	0.151544721087554	36.562971667838	0	24.0132801559182	9.8951048652007	0.0138888888888889	49.0825688073394	137.600596660051	36.562971667838	55.5697478991597	70.33365019482
fb_rec20p_per3	3	20	6.66666666666667	FilterBank	7	110	1	1	231	239	19	0	0	0.0124223602484472	0.0794979079497908	0	0.0277777777777778	0	0	2.61889309119911	9.35882526157624	21.1740409342485	17.2422273291145	0.190168090519665	5.76379890632352	-0.00508246065821662	0.143066589390902	-3.24599997051125	34.567010264985	-0.02256155519976	0.19692977924369	32.9850020000725	0	21.1740409342485	9.02949700804292	0.0248447204968944	-20.234309623431	117.444263173462	32.9850020000725	-7.70619469026549	59.3190891390215
fb_rec20p_per3	3	20	6.66666666666667	FilterBank	7	110	1	4	349	442	34	0	0	0.0135593220338983	0.0769230769230769	0	0.0588235294117647	0.0227272727272727	0	2.80054639301886	10.14600991939	23.739553717456	19.042650293937	0.229469502984409	4.0280038352134	-0.00408763487275854	0.148991700737927	0.162043411818908	3.38274911981493	-0.000572006130464281	0.152075269686307	35.1225713225317	0	23.739553717456	7.46628729888639	0.0101694915254237	26.5268065268065	78.4341640367409	35.1225713225317	40.374483378257	63.0687795479229
fb_rec20p_per3	3	20	6.66666666666667	FilterBank	7	110	1	3	320	393	40	0	0	0.0397111913357401	0.101781170483461	0	0.0833333333333333	0.105263157894737	0.0178571428571429	3.78163832525607	15.5938748336599	23.8868079093415	19.391177506427	0.359320669106969	6.03718257020885	-0.00912078932587351	0.320345589786007	0.750932613611095	12.1409333170723	-0.0191033044410995	0.18824163393429	34.5235741095103	0	23.8868079093415	14.2387034256685	0.0252707581227437	-22.258064516129	119.174420022161	34.5235741095103	21.8214285714286	80.2174415224484
fb_rec20p_per3	3	20	6.66666666666667	FilterBank	7	110	1	4	387	429	32	0	0	0.0236486486486486	0.0745920745920746	0	0.0645161290322581	0	0.0050761421319797	2.80185379755042	10.686512869681	25.9772829624691	19.7661780749856	0.097637799696248	5.1611207874292	-0.00185979632534168	0.135315271149393	-0.0387934238255252	0.872663331299913	-0.00756615600935797	0.127131651652273	39.3180739698093	0	25.9772829624691	9.49189343222089	0.00337837837837838	35.2169811320755	101.526645092203	39.3180739698093	53.2605042016807	48.2380633335863
fb_rec20p_per3	3	20	6.66666666666667	FilterBank	7	110	1	4	292	371	39	0	0	0.0193050193050193	0.105121293800539	0	0.0408163265306122	0.0384615384615385	0.00606060606060606	3.37308273264269	12.8093717721412	25.6214645555272	18.9426132608653	-0.278426118073256	5.48491767751287	0.00544677555451672	0.178885204942412	-0.0447403463419777	3.20804101644412	0.0111695681230419	0.15175120216992	36.595331979336	0	25.6214645555272	9.73641878495748	0.00772200772200772	3.78097982708934	114.10084975426	36.595331979336	31.606976744186	82.7049433914198
fb_rec20p_per3	3	20	6.66666666666667	FilterBank	7	110	1	3	443	750	140	0	0	0.0245700245700246	0.186666666666667	0	0.0540540540540541	0.0166666666666667	0.0151515151515152	5.21190296724286	20.3586396349981	18.9753319006696	21.3732042267235	-0.448481532673791	14.2656011511401	-0.00575053129482461	0.280587551862574	-0.352707838596229	6.42279620668428	-0.00105091066043027	0.155025639239951	36.758423044036	0	18.9753319006696	13.9359439465429	0.0221130221130221	11.0773722627737	114.270793207273	36.758423044036	35.9049345417926	79.6350760185413
fb_rec20p_per3	3	20	6.66666666666667	FilterBank	7	110	1	5	641	1123	163	0	0	0.0315457413249211	0.145146927871772	0	0.0344827586206897	0.0512820512820513	0.0227272727272727	5.390275373051	21.4976545849566	18.1518557331324	22.0759939721576	-0.460207894547282	10.906867530842	0.0174235493634663	0.552542776349791	0.19508479278153	9.05629089093286	0.0052536015918638	0.182259737509614	33.0932725137498	0	18.1518557331324	12.3183206174586	0.00630914826498423	8.62095238095238	91.8095343614381	33.0932725137498	30.0790007806401	59.0611847191267
fb_rec20p_per3	3	20	6.66666666666667	FilterBank	7	110	1	4	485	664	60	0	0	0.0464601769911504	0.0903614457831325	0	0	0.03125	0.0520547945205479	3.88940997681634	14.1940335514003	22.5035709787934	17.8428266619729	-0.0405750930483913	4.34614153941586	0.00163024827242165	0.146243366748892	-0.32735451073644	9.24742046742517	0.00230497402151382	0.154336120643414	30.5812079503861	0	22.5035709787934	8.93739384074427	0.00221238938053097	29.6723868954758	83.4679504477621	30.5812079503861	43.8073170731707	56.6777399469866
fb_rec20p_per3	3	20	6.66666666666667	FilterBank	7	110	1	4	454	619	44	0	0	0.0183908045977011	0.0710823909531502	0	0.0638297872340425	0.0408163265306122	0.00898203592814371	3.72820555724811	13.9892278791597	26.3781461409324	18.0442004702041	-0.0584428800955322	3.79681407672467	0.00536952301778697	0.144845643746473	0.141093643387304	2.36695646695108	0.005963732802427	0.157480086238198	37.8459066986225	0	26.3781461409324	8.63750687807389	0.0183908045977011	68.7609756097561	120.793979342104	37.8459066986225	56.6361185983828	67.9979704786719
fb_rec20p_per3	3	20	6.66666666666667	FilterBank	7	110	1	7	400	675	65	0	0	0.0130890052356021	0.0962962962962963	0	0.0952380952380952	0	0.00366300366300366	4.0133203163598	15.5451101994333	22.1805699288995	20.0949221320514	-0.448968219522903	7.46438711661149	0.0107593732864366	0.169968328532388	-0.0471676704942724	3.24687264913269	0.00819659650111263	0.161162007574182	37.3424395686283	0	22.1805699288995	8.51954442951128	0.0183246073298429	7.49538461538462	96.0974922763791	37.3424395686283	30.55	47.3953293202959
fb_rec20p_per3	3	20	6.66666666666667	FilterBank	7	110	1	5	411	508	34	0	0	0.0178117048346056	0.0669291338582677	0	0	0.0227272727272727	0.0195439739413681	3.28181034778655	12.2031027046023	26.5881748714192	17.5475915912406	-0.0720688979552256	3.30692193664512	-0.000563489684253312	0.146412816003548	-0.215941277705965	3.08158181169041	-0.00948182680059248	0.140275177895278	33.0409014071933	0	26.5881748714192	10.1806397178542	0.00508905852417303	70.5250501002004	139.014333120723	33.0409014071933	56.6074498567335	91.1118931357313
fb_rec20p_per3	3	20	6.66666666666667	FilterBank	7	110	1	5	392	688	40	0	0	0.0182767624020888	0.0581395348837209	0	0.0545454545454545	0	0.0104166666666667	2.85996066767116	11.7528929387344	23.8545887092457	17.2278031869969	-0.0606865991466898	4.59199598544813	0.000497163308387429	0.142237201100325	-0.222994571090625	7.89431930624305	-0.00100161597880373	0.146767522066665	35.9387361562378	0	23.8545887092457	9.12685576621183	0.0156657963446475	43.3058823529412	103.434456820906	35.9387361562378	49.9397590361446	65.4543681176585
fb_rec20p_per3	3	20	6.66666666666667	FilterBank	7	110	1	2	330	350	38	0	0	0.0155440414507772	0.108571428571429	0	0.0666666666666667	0.0333333333333333	0	2.93925570044775	10.9049817586373	21.2385331525283	19.2756617077952	-0.333599914376653	5.83719840240226	-0.00886370530414801	0.122958241257531	-0.0588033474389963	2.30758802850954	-0.0169899270599209	0.106987133377695	36.5412612783086	0	21.2385331525283	9.28017474233714	0.0466321243523316	47.7913043478261	83.1784466910344	36.5412612783086	57.4912442396313	32.9004839738246
fb_rec20p_per3	3	20	6.66666666666667	FilterBank	7	110	1	2	273	335	34	0	0	0.0723981900452489	0.101492537313433	0	0.0588235294117647	0	0.0909090909090909	3.68894205837021	14.6339477812378	20.4633056681721	17.5120212669116	0.70588676221317	5.06905119605093	-0.00275848846709777	0.130963948655686	4.94579400785859	26.294138401699	-0.00398603790144482	0.119340826300998	28.4666234374182	0	20.4633056681721	11.4143792111166	0.00904977375565611	42.0940438871473	129.855182747651	28.4666234374182	50.5897435897436	89.4678801109467
fb_rec20p_per3	3	20	6.66666666666667	FilterBank	7	110	1	6	471	681	62	0	0	0.0292134831460674	0.0910425844346549	0	0.04	0.051948051948052	0.0249221183800623	4.24752196662799	17.4119317777611	25.0098691620211	20.6023831437003	0.218011235527234	7.2384006369812	0.000134153107307287	0.149558892500945	0.658489016914365	11.7379679554863	0.00112239105483118	0.134256311970666	37.7251091147617	0	25.0098691620211	9.12008616936335	0.00898876404494382	54.553706505295	96.8105408690714	37.7251091147617	62.027763496144	55.8459852859854
fb_rec20p_per3	3	20	6.66666666666667	FilterBank	7	110	1	4	345	442	36	0	0	0.0195439739413681	0.081447963800905	0	0	0.04	0.014218009478673	4.33192443184278	17.4780810805876	26.7678471974215	19.5911035135249	0.535638403182385	6.11886530869068	0.0015859590804408	0.208873386757215	-0.680079722481534	17.1571055809768	-0.00338281820145346	0.137226427612128	39.0196806466571	0	26.7678471974215	10.5400733524959	0.0162866449511401	28.3133640552995	109.383041848745	39.0196806466571	46.1652892561983	56.9650613029783
fb_rec20p_per3	3	20	6.66666666666667	FilterBank	7	110	1	4	400	537	40	0	0	0.0289017341040462	0.074487895716946	0	0.125	0.0227272727272727	0.0126050420168067	3.69795919606432	14.2631139840099	24.3910188549082	17.5113283849202	0.286458863429577	4.15876809901278	-0.00184574027795723	0.14369290002761	0.0218894981754535	2.05781067864532	0.00674424673764489	0.147053223374782	35.4452383296252	0	24.3910188549082	10.7523013253661	0.0289017341040462	48.911877394636	99.1228899188961	35.4452383296252	51.8063271604938	51.5431223853008
fb_rec20p_per3	3	20	6.66666666666667	FilterBank	7	110	1	4	391	633	71	0	0	0.0286458333333333	0.11216429699842	0	0.111111111111111	0.0459770114942529	0.0111940298507463	3.47545174246376	13.5080611873471	20.7373030799002	18.5799955172404	-0.17588025757819	6.79429088805157	-0.00167954705772476	0.167637222052249	-0.0448594016097033	4.61750379697637	-0.00108112425852282	0.130003652999289	31.6702285925312	0	20.7373030799002	8.09183189473593	0.0104166666666667	-10.671009771987	99.3699199218536	31.6702285925312	17.74706331045	60.2853296850367
fb_rec20p_per3	3	20	6.66666666666667	FilterBank	7	110	1	6	480	632	54	0	0	0.0258823529411765	0.0854430379746835	0	0.0454545454545455	0.0333333333333333	0.0178571428571429	3.59177157905728	13.8483135903952	20.997821974973	17.5080788891653	-0.236080560629866	3.95967079780143	0.0101718377946413	0.327011055912312	-0.334403894792664	4.02056226412359	0.0220696140331297	0.368896686181446	29.517704899993	0	20.997821974973	9.5782704340577	0.00235294117647059	32.4350649350649	88.2104966063592	29.517704899993	51.2964824120603	58.7060090959027
fb_rec20p_per3	3	20	6.66666666666667	FilterBank	7	110	1	4	472	658	72	0	0	0.045766590389016	0.109422492401216	0	0.0625	0	0.0537313432835821	4.12032440342406	16.3620546262351	21.1014372553093	18.4840369460004	-0.142063300729493	6.1112273753788	-0.00633284327395122	0.188044968689011	0.456852653706071	13.013312225179	0.00218587692130903	0.149522441342781	29.7898915210203	0	21.1014372553093	11.239430362774	0.0022883295194508	18.3074484944533	66.1308029828916	29.7898915210203	21.1259259259259	49.5744138552069
fb_rec20p_per3	3	20	6.66666666666667	FilterBank	7	110	1	4	527	676	53	0	0	0.0271844660194175	0.0784023668639053	0	0	0.0232558139534884	0.0303030303030303	3.62172606518335	13.3954655404309	22.2678031477758	17.3397917229934	0.0232831876072155	4.08337042282335	0.00936057237536232	0.265273223338074	0.227569598929568	4.85670342813352	-0.00732829204852946	0.139351234716091	29.39794298085	0	22.2678031477758	9.88369408178808	0.0058252427184466	41.5252679938744	79.2848482832485	29.39794298085	38.1424892703863	48.6086389665182
fb_rec20p_per3	3	20	6.66666666666667	FilterBank	7	110	1	3	252	354	87	0	0	0.0514285714285714	0.245762711864407	0	0.0952380952380952	0.06	0.0222222222222222	3.3631123436086	12.4148507357199	17.4808034965845	22.8459660843784	0.16681857168337	14.4331779287446	-0.0223247478350964	0.51473525143091	-0.209120826688135	4.28649320658484	0.00781558682760175	0.132506466390376	36.5525065719531	0	17.4808034965845	12.225037983069	0.0628571428571429	12.4985163204748	139.160196412801	36.5525065719531	28.4889380530973	74.2288659600788
fb_rec20p_per3	3	20	6.66666666666667	FilterBank	7	110	1	6	620	950	61	0	0	0.0105820105820106	0.0642105263157895	0	0	0	0.0124740124740125	2.67324017386888	9.25334309165804	23.2300222332874	18.1027919508478	-0.0573555433373167	4.08149622566052	-0.00331505433337548	0.160276928593604	-0.271532731734203	4.90746310178657	0.00205581732493136	0.158026209803686	34.9516533874864	0	23.2300222332874	6.86942897160089	0.00529100529100529	42.4994640943194	57.9051619346882	34.9516533874864	48.5725047080979	39.927149664337
fb_rec20p_per3	3	20	6.66666666666667	FilterBank	7	110	1	5	288	397	21	0	0	0.0128755364806867	0.052896725440806	0	0.0238095238095238	0.0158730158730159	0.00740740740740741	2.12762467033387	7.14011569417214	22.9473943072436	18.3755221236613	0.0469642001696012	5.26434699114588	0.00652681373316189	0.134359924795365	0.459631842919069	7.46099463442866	0.00252875686541879	0.136557936538591	36.0435347350484	0	22.9473943072436	7.16066418676858	0	59.6419437340153	142.008720137837	36.0435347350484	55.4341463414634	92.5376012864026
fb_rec20p_per3	3	20	6.66666666666667	FilterBank	7	110	1	5	507	534	17	0	0	0.0128755364806867	0.0318352059925094	0	0.0384615384615385	0.02	0.0028328611898017	1.84086998621588	5.1367598975	30.6385439625842	15.640506365953	-0.0693799350943969	1.9291327119503	0.00513762671737266	0.161179436475943	-0.143291853391642	1.57165303220257	0.00802459804981698	0.157289773491054	35.7534395840427	0	30.6385439625842	5.79559359077746	0.00858369098712446	2.29643527204503	99.6131347895807	35.7534395840427	28.5811138014528	58.307948231024
fb_rec20p_per3	3	20	6.66666666666667	FilterBank	7	110	1	6	395	564	74	0	0	0.0215384615384615	0.131205673758865	0	0.0857142857142857	0.0392156862745098	0.0102040816326531	3.36493893153024	11.436520922061	21.8950207685367	21.1123945620111	-0.166564738469068	7.79685381632852	0.0104680667785066	0.171305709493531	-0.00995368214912571	7.5547895382954	0.000912212320634373	0.146754663073779	40.9199795241366	0	21.8950207685367	14.7282874142874	0.0184615384615385	21.3056603773585	68.4573809853826	40.9199795241366	43.0216086434574	47.3906111066789
fb_rec20p_per3	3	20	6.66666666666667	FilterBank	7	110	1	2	429	491	46	0	0	0.0102827763496144	0.0936863543788187	0	0	0.0333333333333333	0.0100671140939597	3.45782107720028	12.8094500353462	24.2630458851583	17.4553068595555	0.0136194101649653	5.34347165402465	0.00444954943292217	0.152994580881321	-0.0445516702825087	7.12281053532343	0.00481963655856781	0.159669118813143	32.9918768220514	0	24.2630458851583	11.3485509827036	0.0359897172236504	64.9113924050633	140.521215498747	32.9918768220514	57.5440729483283	74.9490804980745
fb_rec20p_per3	3	20	6.66666666666667	FilterBank	7	110	1	4	506	918	49	0	0	0.0241935483870968	0.0533769063180828	0	0.0357142857142857	0.027027027027027	0.0236220472440945	2.11099576187304	7.55796245486893	21.7021471018514	16.0236808347245	-0.112364708736987	4.11445059419007	-0.00136039595870901	0.153077406555643	-0.0493751348685735	4.21406372335693	-0.00285508643098106	0.150954978564064	33.4381266558077	0	21.7021471018514	7.77580421927503	0.00604838709677419	17.5929203539823	63.63665369032	33.4381266558077	26.695464362851	49.5303497075686
fb_rec20p_per3	3	20	6.66666666666667	FilterBank	7	110	1	5	573	1135	77	0	0	0.0158450704225352	0.06784140969163	0	0.0588235294117647	0	0.0149892933618844	3.51134033880102	13.517895436297	22.3759174566641	17.6518602078307	-0.104016456668471	4.73967555610619	0.00859194403971357	0.149286224023732	0.359274002700536	4.73756492175949	0.0133961595269108	0.141533650158539	36.3270393902689	0	22.3759174566641	8.35164793950245	0	36	59.6183448973597	36.3270393902689	38.6048995320672	43.4292028239938
fb_rec20p_per3	3	20	6.66666666666667	FilterBank	7	110	1	4	419	414	27	0	0	0.0275482093663912	0.0652173913043478	0	0.105263157894737	0.0298507462686567	0.012448132780083	3.57859463366334	12.2127624382931	29.6850865014828	17.1724768779197	-0.10980468038174	2.76235121221369	-0.00643291632161177	0.13507496606471	-0.0608714845391184	7.05120239574405	-0.00971086142906145	0.143851415275998	36.127645482981	0	29.6850865014828	9.638014909238	0.00826446280991736	37.5980148883375	78.1814905760077	36.127645482981	43.5974025974026	53.4115018271671
fb_rec20p_per3	3	20	6.66666666666667	FilterBank	7	110	1	2	289	359	59	0	0	0.0546218487394958	0.164345403899721	0	0.12	0	0.0429447852760736	3.59297900073614	14.1519418811651	18.3372831637947	18.6098843643201	-0.346009276969958	7.53017325165221	0.0091440387567146	0.22618401586434	-0.50985628053559	13.6843375839639	0.0172357827350563	0.139230537555842	29.022893269423	0	18.3372831637947	10.3016977266805	0.046218487394958	56.0356083086053	124.658576251442	29.022893269423	43.3333333333333	79.1613987408687
fb_rec20p_per3	3	20	6.66666666666667	FilterBank	7	110	1	4	439	551	40	0	0	0.0297766749379653	0.0725952813067151	0	0.0294117647058824	0.177777777777778	0.009375	2.11192361273211	7.29833373051012	20.8454647666593	16.423000434538	-0.134609208668601	4.09820270500548	0.00642359082980147	0.155534473169135	0.0571090571311005	7.58497330137991	0.0073208731489544	0.158375361964705	26.7753169505989	0	20.8454647666593	8.94925977830039	0.00496277915632754	37.7142857142857	112.37069213501	26.7753169505989	24.0255542437361	79.5032330489636
fb_rec20p_per3	3	20	6.66666666666667	FilterBank	7	110	1	6	500	727	55	0	0	0.0190677966101695	0.0756533700137552	0	0.037037037037037	0.0144927536231884	0.0164835164835165	3.54078967502325	13.0898852571555	21.7647830776046	19.3484002285964	0.189968575891933	6.04977599709113	-0.00220348950193445	0.236693593420617	-0.14385187244458	3.82831626620057	0.00691394440387232	0.132134015497232	32.6099444367954	0	21.7647830776046	8.02819457376743	0.00423728813559322	5.61452513966481	68.9567170309774	32.6099444367954	23.3364485981308	47.4611526441239
fb_rec20p_per3	3	20	6.66666666666667	FilterBank	7	110	1	5	689	1181	99	0	0	0.0261941448382126	0.0838272650296359	0	0	0.0172413793103448	0.0284697508896797	3.41694081408285	13.4814391301137	20.7988541194848	17.189064180447	0.165375840957405	6.07453194724008	-0.000233879918839175	0.151174167174476	-0.470798311850738	8.90144324489328	-0.000839779392236731	0.14440024416247	32.8764848682632	0	20.7988541194848	6.49014298186676	0.00770416024653313	16.3855421686747	77.2041337938361	32.8764848682632	36.8976512943597	46.7858421180499
fb_rec20p_per3	3	20	6.66666666666667	FilterBank	7	110	1	2	333	375	23	0	0	0.00364963503649635	0.0613333333333333	0	0	0	0	3.47805923966974	12.0038154217697	24.7788805074726	18.1454213784355	-0.0914695100316469	3.301511875318	0.00498037974019351	0.131243902220001	0.254419697961808	3.57319827980919	0.00819942403776639	0.117905024237616	35.0789572204342	0	24.7788805074726	4.86773718898329	0.0072992700729927	45.1739130434783	108.095891297665	35.0789572204342	60.2385321100918	68.1306550548581
fb_rec20p_per3	3	20	6.66666666666667	FilterBank	7	110	1	3	294	256	12	0	0	0	0.046875	0	0	0	0	2.77649460517174	9.46465739366275	27.2304215851129	15.8064200772741	-0.03042793010077	2.59706025790667	-0.0114945441379669	0.17305962084897	-0.181152959488271	1.90879859152944	-0.0112347343337099	0.176043498498265	34.338268109076	0	27.2304215851129	7.44102423922031	0.0256410256410256	0.679841897233202	105.151649127632	34.338268109076	32.8421052631579	67.5447884889159
fb_rec20p_per3	3	20	6.66666666666667	FilterBank	7	110	1	4	404	835	37	0	0	0.00249376558603491	0.044311377245509	0	0	0	0.00341296928327645	2.47800759113972	8.84542435510063	22.2305584679411	17.1140449718261	0.017328599556929	3.11130319121715	-0.00304693919651554	0.158043198260659	0.0370154245502582	0.869146002776726	-0.0121597572794127	0.16905801834461	38.6187792831647	0	22.2305584679411	4.03326923697342	0.0124688279301746	36.4184914841849	78.741502172283	38.6187792831647	59.3314121037464	42.3933168882353
fb_rec20p_per3	3	20	6.66666666666667	FilterBank	7	110	1	3	312	488	36	0	0	0.0152671755725191	0.0737704918032787	0	0.0232558139534884	0	0.00571428571428571	3.18098007468464	11.7253747471724	20.5272217465645	17.2838122641866	0.12804235046202	5.33672641516861	-0.00317497320857428	0.130929021691535	0.190999461980708	1.9248466611786	-0.00886381110749238	0.128578001885922	35.0620696163835	0	20.5272217465645	9.82826571323046	0.0305343511450382	73.5486542443064	137.565869598806	35.0620696163835	78.8309153257716	78.8970522656171
fb_rec20p_per3	3	20	6.66666666666667	FilterBank	7	110	1	5	532	678	39	0	0	0.0242424242424242	0.0575221238938053	0	0	0.0757575757575758	0.0175438596491228	2.41084206416279	8.56903529026142	22.2658571100327	17.0481501569516	0.113866273097229	3.74869092995071	0.00908092781966905	0.179941287167832	-0.0798969963300379	10.2899776172913	0.00797491473732936	0.160323001595287	28.2176711376321	0	22.2658571100327	5.14370152345818	0	30.0835820895522	69.6574934713845	28.2176711376321	44.7909730848861	58.4764121099025
fb_rec20p_per3	3	20	6.66666666666667	FilterBank	7	110	1	4	349	472	44	0	0	0.0224358974358974	0.0932203389830508	0	0.0294117647058824	0.032258064516129	0.00952380952380952	3.55221474635834	12.2649342363758	23.9218762893157	18.5743119433144	-0.164669895951667	3.17316820430118	-0.0130708201614612	0.27448759683019	-0.253036463051364	4.15296844814104	-0.007794214748895	0.165479572971973	35.0410749301324	0	23.9218762893157	14.5737152610983	0.00961538461538462	52.2035398230088	124.456470402852	35.0410749301324	39.921568627451	61.3405661408155
fb_rec20p_per3	3	20	6.66666666666667	FilterBank	7	110	1	3	394	693	120	0	0	0.0647668393782383	0.173160173160173	0	0.163636363636364	0.0612244897959184	0.0268199233716475	6.24663025463579	23.2060679054535	20.2465127128414	19.8817102387942	0.0955838206145613	8.35403317769241	-0.000330876988588171	0.220379297417829	-0.558266652878349	9.51597449993683	0.00544944570782374	0.212685844036439	33.0419160228071	0	20.2465127128414	15.1060506861266	0.0207253886010363	31.3952095808383	122.335467112972	33.0419160228071	49.1871609403255	56.1344339504128
fb_rec20p_per3	3	20	6.66666666666667	FilterBank	7	110	1	3	358	549	106	0	0	0.0502958579881657	0.193078324225865	0	0.133333333333333	0.0425531914893617	0.04	5.13550966177557	19.800000505202	18.0940262395983	19.9656822758015	-0.401347843188593	11.6960483846534	-0.00118945636968249	0.16586350470735	0.336608755020422	4.98577955807688	0.00391597217237326	0.149131021869492	32.0454210907821	0	18.0940262395983	12.7559850850207	0.0266272189349112	53.6913827655311	117.482532863417	32.0454210907821	65.3161471760019	70.789614783537
fb_rec20p_per3	3	20	6.66666666666667	FilterBank	7	110	1	6	559	1053	229	0	0	0.110307414104882	0.217473884140551	0	0.125	0.138888888888889	0.0808080808080808	6.94956751789907	26.0206940409663	15.8348793256862	22.496743783181	-0.304372829163045	12.5006461040155	0.002587760865166	0.386130363727308	-0.303569665836465	16.119836741007	-0.0204307797003395	0.172046706792505	32.0501372185397	0	15.8348793256862	13.9592559454422	0.0144665461121157	14.387027027027	65.9393122887476	32.0501372185397	31.460278372591	55.4882078812322
fb_rec20p_per3	3	20	6.66666666666667	FilterBank	7	110	1	2	261	203	7	0	0	0.00606060606060606	0.0344827586206897	0	0.0357142857142857	0	0	2.09142013747119	6.45853543404343	23.0314466078347	15.3029048165878	-0.0296221577166012	2.0238359924655	-0.00678052276474949	0.152183519038987	0.0620100304260562	1.5835652732048	-0.0263200150878683	0.142644445741345	29.8969228385028	0	23.0314466078347	7.27802740588783	0.0363636363636364	1.64	84.6309778512591	29.8969228385028	24.1515151515152	58.8944566201909
fb_rec20p_per3	3	20	6.66666666666667	FilterBank	7	110	1	4	431	623	66	0	0	0.0132978723404255	0.105939004815409	0	0	0.0212765957446809	0.00738007380073801	2.44670409336483	10.4070446594033	18.9471224759451	19.5988660286009	0.674127072341069	9.12083566814311	-0.00207783816859388	0.160018206191918	0.145149379739993	2.29760344709769	-0.000114993697224908	0.144193365642181	32.7348822041834	0	18.9471224759451	5.85037371609566	0.00531914893617021	43.8918918918919	75.8471287473923	32.7348822041834	56.5169230769231	43.2383987481705
fb_rec20p_per3	3	20	6.66666666666667	FilterBank	7	110	1	5	593	840	66	0	0	0.00848896434634975	0.0785714285714286	0	0.0416666666666667	0	0.00601202404809619	3.33429946410753	12.5858147541987	26.2353620878209	18.0700350769552	0.078453900774637	5.83123504501896	0.00371270569290288	0.156917808615426	-0.0133523051558626	1.19372520072725	0.00134279145040535	0.155887068643264	36.063116852546	0	26.2353620878209	6.01440537979589	0.00509337860780985	45.2867469879518	97.1679167529074	36.063116852546	62.3269961977186	50.5440073534038
fb_rec20p_per3	3	20	6.66666666666667	FilterBank	7	110	1	2	437	389	16	0	0	0.0162162162162162	0.0411311053984576	0	0	0.0232558139534884	0.0125523012552301	2.57196209688666	8.68225214441961	28.9298870877707	13.9736188201178	-0.0320052397768375	1.34470327618075	-0.00537065582483626	0.165406846124433	0.162258278885225	2.51203803799317	-0.00632648401862749	0.1691054604225	32.1346447903172	0	28.9298870877707	11.0681458644999	0.00810810810810811	-2.40208877284595	72.8822847486313	32.1346447903172	6.91965255157438	66.2753662345447
fb_rec20p_per3	3	20	6.66666666666667	FilterBank	7	110	1	4	476	823	55	0	0	0.0108225108225108	0.0668286755771567	0	0.09375	0.032258064516129	0	3.05490871794044	11.225903954673	22.4324249585612	18.1948772615252	-0.138547849222663	4.29199576810227	0.00166677070445126	0.14927011861109	0.158129261161225	2.74694850066441	0.00929052022070337	0.154423560161069	35.2954693877331	0	22.4324249585612	9.58554792783627	0.00432900432900433	50.8316831683168	99.0699820800023	35.2954693877331	56.1200495049505	69.1883160900179
fb_rec20p_per3	3	20	6.66666666666667	FilterBank	7	110	1	4	534	750	51	0	0	0.0118811881188119	0.068	0	0	0.0597014925373134	0.00488997555012225	2.04554474215472	7.39272646746651	22.1200986931859	16.6913158162052	-0.08171574282251	4.35577003959429	-0.000426872143168754	0.148129546933384	-0.0609803092677641	2.720515922292	0.00238893920382364	0.146778909536012	30.8107055125163	0	22.1200986931859	5.27805073157367	0.00396039603960396	19.9450549450549	74.5939379163089	30.8107055125163	30.8161434977578	60.1525947914981
fb_rec20p_per3	3	20	6.66666666666667	FilterBank	7	110	1	4	420	620	58	0	0	0.033033033033033	0.0935483870967742	0	0	0.0606060606060606	0.0333333333333333	2.80658720125767	11.527911675229	21.1208606230099	17.8818216956095	-0.188191523696236	5.18675042613833	-0.00723549763758427	0.146672782225234	0.557190888084847	6.6282230836121	-0.00919201450597368	0.133820176579591	33.1587087545705	0	21.1208606230099	8.96095827850862	0.015015015015015	42.5234899328859	91.4355783790651	33.1587087545705	60.6883286647993	57.6085963771765
fb_rec20p_per3	3	20	6.66666666666667	FilterBank	7	110	1	3	361	417	15	0	0	0.0204081632653061	0.0359712230215827	0	0	0.0153846153846154	0.0186915887850467	2.03087269459847	6.82844968954159	25.1905758443845	17.1117515946059	0.0389128934590118	3.6014774118588	0.0148246421693358	0.169319139633944	-1.16690782741894	12.3006730711443	0.0177934581916871	0.171205572650739	31.2054012615914	0	25.1905758443845	7.50798808879183	0.00291545189504373	48.2024096385542	83.1760689638906	31.2054012615914	56.9933909506863	66.2506066854758
fb_rec20p_per3	3	20	6.66666666666667	FilterBank	7	110	1	3	459	684	32	0	0	0.0154525386313466	0.0467836257309941	0	0.05	0.0333333333333333	0.00297619047619048	2.91577914748773	10.2452954260771	26.7866232291906	17.7314215968626	0.067567488816666	3.64102058929266	0.00637503236379976	0.150167901480933	0.097560424413236	1.60786665341513	0.0163774305678576	0.143044042628396	38.2975253121938	0	26.7866232291906	8.21652964672622	0.0286975717439294	59.5614814814815	103.039837003323	38.2975253121938	62.1745635910224	63.2485529587166
fb_rec20p_per3	3	20	6.66666666666667	FilterBank	7	110	1	6	490	857	88	0	0	0.0205761316872428	0.102683780630105	0	0	0.0285714285714286	0.0219178082191781	3.62858929697723	14.2491270780076	21.9839889794757	18.7111999272228	0.243125337137904	4.96118300851342	-0.000338192009685458	0.168856776852559	0.122375197193976	6.00954383929077	0.00109969175196602	0.146161096115078	35.4650852563082	0	21.9839889794757	10.1683745137678	0.0267489711934156	29.504854368932	76.3756621883267	35.4650852563082	42.5047619047619	48.3946828002024
fb_rec20p_per3	3	20	6.66666666666667	FilterBank	7	110	1	3	424	502	46	0	0	0.0714285714285714	0.0916334661354582	0	0.0487804878048781	0.0652173913043478	0.0446096654275093	3.63791185695678	13.7324494327882	23.7615871342763	18.1220197153424	-0.262697255849525	5.90985130587717	0.00695281623780533	0.150922285454563	-0.0216982094326464	17.9255485383565	0.011527066000526	0.175835003000264	31.6361402763536	0	23.7615871342763	9.80684636209735	0.00793650793650794	22.7563025210084	69.1550162749173	31.6361402763536	42.5160493827161	49.6971022366698
fb_rec20p_per3	3	20	6.66666666666667	FilterBank	7	110	1	3	316	360	58	0	0	0.0368421052631579	0.161111111111111	0	0.0714285714285714	0.0697674418604651	0.0101010101010101	4.34732073929946	17.6525406585677	17.6589208713329	24.9432240064974	0.328695641784463	14.7130911859522	-0.00736373511743431	0.70773637329355	-0.00613864554874893	10.081152873578	-0.0318260696912901	0.39578429654992	38.3435256887702	0	17.6589208713329	14.6201990665122	0.0105263157894737	40.1785714285714	105.02283029289	38.3435256887702	46.4827586206897	52.875259842844
fb_rec20p_per3	3	20	6.66666666666667	FilterBank	7	110	1	3	383	595	20	0	0	0.0166204986149584	0.0336134453781513	0	0.0192307692307692	0	0.00775193798449612	2.19358052299243	6.37543178693705	26.0880642742566	17.0199419647035	-0.0106908537069059	2.4669668409406	0.00825388545690098	0.156093329050685	0.0514008424297485	1.22783862440602	0.0203812611446457	0.154503992931765	38.4650606095474	0	26.0880642742566	9.19113720347081	0.0221606648199446	55.6524701873935	75.4813575058005	38.4650606095474	52.8961038961039	54.7041993911346
fb_rec20p_per3	3	20	6.66666666666667	FilterBank	7	110	1	2	399	386	21	0	0	0.0159235668789809	0.0544041450777202	0	0	0	0.0199203187250996	2.6177940319499	9.64231369492591	22.695082176932	15.3995282003855	-0.0226749871814228	3.06405918215493	0.00712642109003534	0.152783632350048	-0.234825569966277	3.81123695303708	0.00134314147158588	0.156127579617936	27.5728714787341	0	22.695082176932	7.54552671109551	0.0159235668789809	39.55672823219	63.1911003198836	27.5728714787341	45.198606271777	37.510076941758
fb_rec20p_per3	3	20	6.66666666666667	FilterBank	7	110	1	1	302	251	12	0	0	0	0.047808764940239	0	0	0	0	2.624295607153	9.80092192570084	27.5710130470172	16.0897301862242	0.253024586903412	3.5465625944474	-0.00977278871737701	0.130644423874687	0.0231807149887149	0.886735207883285	-0.0176128232843106	0.125320975712716	36.5049525816978	0	27.5710130470172	8.05779460366763	0.0261780104712042	74.9879518072289	113.958979671653	36.5049525816978	70.7027027027027	65.1465599886901
fb_rec20p_per4	3	20	6.66666666666667	JAR_FilterBank	7	110	1	4	435	591	44	0	0	0.0142517814726841	0.0744500846023689	0	0	0.0151515151515152	0.00980392156862745	3.69786898280096	15.4414109042078	26.4636773933795	17.2794348094533	-0.0573899154414863	4.61464951087992	-0.00695224390559358	0.149082382217574	-0.0753745933623129	2.21295787481261	0.00094648580264911	0.153712094564058	36.2927245514381	0	26.4636773933795	8.04742521572205	0.00950118764845606	14.9756097560976	115.63719561483	36.2927245514381	47.5730337078652	72.1488114183496
fb_rec20p_per4	3	20	6.66666666666667	JAR_FilterBank	7	110	1	4	421	548	30	0	0	0.02088772845953	0.0547445255474453	0	0.0303030303030303	0.0655737704918033	0.010752688172043	3.36303357341958	14.4778318310316	24.6681682835563	16.2100337159651	-0.16000588665642	4.04059282203539	0.00391620251310057	0.153110327719604	-0.19670297318861	7.70559928086946	0.00819494447834443	0.157175540277202	32.0534785116801	0	24.6681682835563	11.0110141734271	0.00522193211488251	0.9812734082397	88.7504862205226	32.0534785116801	23.0808943089431	63.8073362648004
fb_rec20p_per4	3	20	6.66666666666667	JAR_FilterBank	7	110	1	4	335	536	46	0	0	0.0144404332129964	0.0858208955223881	0	0	0	0.00588235294117647	3.24022585472665	12.4815094140002	23.2182219610559	17.4776547247667	0.0132849917297593	4.17791919310955	0.0092931771432608	0.143149093631784	0.000932474282928308	2.66453303739631	0.00746955692633855	0.130438660970017	38.6057459764505	0	23.2182219610559	9.04730855745768	0.0324909747292419	16.5136186770428	87.3731930451387	38.6057459764505	39.7373737373737	51.9571447495882
fb_rec20p_per4	3	20	6.66666666666667	JAR_FilterBank	7	110	1	4	278	272	19	0	0	0.0045045045045045	0.0698529411764706	0	0.0208333333333333	0	0	2.98057920500569	11.4231605497231	30.0951703281531	18.0367629094298	-0.0376293841034714	3.70024791546455	-0.0233921032603593	0.349542694453136	-0.281965443080991	3.78050342383213	-0.00893193112744703	0.158381852336393	38.1427306766159	0	30.0951703281531	9.5267231483111	0.0540540540540541	7.03649635036496	109.225203974558	38.1427306766159	29.945945945946	63.425558019664
fb_rec20p_per4	3	20	6.66666666666667	JAR_FilterBank	7	110	1	4	332	539	34	0	0	0.0132890365448505	0.0630797773654917	0	0	0.0178571428571429	0	3.3582329208184	13.2979467868264	23.9111135246293	17.4836108090354	0.0522460889995449	3.91310474229581	0.00242095319773761	0.14407350019756	-0.0129404671526839	2.37578619641921	-0.000712447330106774	0.13902124986558	38.2302556415481	0	23.9111135246293	10.6584541044658	0.00664451827242525	-10.5275142314991	98.6464415944463	38.2302556415481	33.875	58.4504482614187
fb_rec20p_per4	3	20	6.66666666666667	JAR_FilterBank	7	110	1	1	229	211	8	0	0	0	0.037914691943128	0	0	0	0	2.27684118377308	8.52481036266673	25.0084025463197	17.2682907547735	-0.159620591763858	2.36327933213488	0.00296876465115524	0.14216681810891	-0.0747488528221881	1.13747671585259	0.00576962523439952	0.14239024492903	35.5638962821274	0	25.0084025463197	10.347835389756	0.0754716981132075	0.346153846153846	84.2799303025478	35.5638962821274	30.1428571428571	52.7579646252851
fb_rec20p_per4	3	20	6.66666666666667	JAR_FilterBank	7	110	1	4	520	711	38	0	0	0.0120240480961924	0.0534458509142053	0	0.04	0.0563380281690141	0.00255754475703325	2.5875401779893	9.59366505677893	27.5272190566772	17.3689908561169	0.00685036118881817	2.5883260494842	-0.00156780539822255	0.13998199154107	0.130580593694147	2.38742313542052	-0.000599889276900642	0.122657640834244	37.2218715523877	0	27.5272190566772	3.96915984998925	0.00200400801603206	53.0815450643777	76.6277642749765	37.2218715523877	65.5037861915367	54.9512706933272
fb_rec20p_per4	3	20	6.66666666666667	JAR_FilterBank	7	110	1	3	440	548	42	0	0	0.0406698564593301	0.0766423357664234	0	0.0731707317073171	0.0857142857142857	0.028125	2.97985864708823	10.6658782077399	22.9772337197717	16.3322784483129	0.30922034690475	3.69671561245217	0.00301334327263838	0.1777087424546	0.246616552201758	5.05398722639998	0.00117770418428766	0.184887205632188	28.9808474047952	0	22.9772337197717	7.54210646805193	0.0143540669856459	31.362962962963	104.309842959058	28.9808474047952	49.7288888888889	51.4822764633457
fb_rec20p_per4	3	20	6.66666666666667	JAR_FilterBank	7	110	1	2	515	830	62	0	0	0.0323974082073434	0.0746987951807229	0	0.0277777777777778	0.0476190476190476	0.0310077519379845	3.41689170174327	13.1576616192312	24.8933861920662	18.2197326532973	-0.0995021604567695	4.64450891060247	0.00273208757736088	0.214979436193496	0.166716140265324	8.71175707750975	0.0106955236892684	0.127843993065587	36.6558350209874	0	24.8933861920662	6.99399039648124	0	15.1319358816276	84.8893316077803	36.6558350209874	31.0451162790698	55.7413131983154
fb_rec20p_per4	3	20	6.66666666666667	JAR_FilterBank	7	110	1	2	265	326	52	0	0	0.0412371134020619	0.159509202453988	0	0.127659574468085	0.0487804878048781	0	4.25825865069349	17.7729591261885	23.5288901664845	21.4138624107189	-0.119443521640501	5.74781996843078	0.0029001717512781	0.1561253149593	-0.668579769426591	9.66493950376362	0.00532759644156694	0.121578879967065	39.9819602431898	0	23.5288901664845	11.4571061501897	0.0567010309278351	-10.0066445182724	131.117301003223	39.9819602431898	36.9934640522876	62.6406309132568
fb_rec20p_per4	3	20	6.66666666666667	JAR_FilterBank	7	110	1	3	448	702	70	0	0	0.0117370892018779	0.0997150997150997	0	0.037037037037037	0.03125	0.00298507462686567	3.30672215187341	13.7179079363666	23.7091017755481	18.7688252731111	0.520773980330878	5.40011591920155	0.00520188051176664	0.202768999559042	0.133179045768607	1.94573271354654	-0.00598171725890105	0.120953878443453	37.3734849490344	0	23.7091017755481	9.21315170516743	0.0117370892018779	56.0350364963504	114.174171600707	37.3734849490344	66.7291666666667	70.144123048616
fb_rec20p_per4	3	20	6.66666666666667	JAR_FilterBank	7	110	1	4	372	737	81	0	0	0.0303030303030303	0.109905020352782	0	0.0769230769230769	0.0344827586206897	0.0206611570247934	4.62470553994009	18.200602367702	21.6748459826632	18.9699070304504	0.383262007676501	5.89145575787446	-0.0115077216986505	0.155393348113917	0.4669259869722	6.2292869694518	-0.00582943131180055	0.158932564963489	37.9600958367198	0	21.6748459826632	11.6787372798874	0.0165289256198347	8.68361581920904	106.770233615655	37.9600958367198	41.3129642287537	67.855390440116
fb_rec20p_per4	3	20	6.66666666666667	JAR_FilterBank	7	110	1	1	374	544	68	0	0	0.0333333333333333	0.125	0	0.0588235294117647	0	0.0242424242424242	5.35538994685114	22.2553926889847	21.6950843239678	18.3738789319108	0.0928247238364304	5.90560196298231	0.00661300842864103	0.153301418239536	-0.822922146818163	14.6398108054299	0.0242188630431429	0.148263430584978	37.3886675480039	0	21.6950843239678	12.5077775376531	0.0555555555555556	43.868978805395	108.318198937925	37.3886675480039	53.5809523809524	72.4231030510843
fb_rec20p_per4	3	20	6.66666666666667	JAR_FilterBank	7	110	1	3	462	684	58	0	0	0.032258064516129	0.0847953216374269	0	0.0256410256410256	0	0.023489932885906	5.48030631079267	22.0698094596983	24.7878136681658	18.9933979064643	-0.11174031215312	5.50894687196643	0.00255460361471982	0.142146845546239	0.0107971534309499	14.5366496558098	0.00506898658976126	0.145051092679889	37.7255141953643	0	24.7878136681658	11.7866203500559	0.00992555831265509	20.8703427719821	114.303417375044	37.7255141953643	46.7578347578348	71.2767326482675
fb_rec20p_per4	3	20	6.66666666666667	JAR_FilterBank	7	110	1	3	361	565	68	0	0	0.0511945392491468	0.120353982300885	0	0.0555555555555556	0.0163934426229508	0.06	5.48114411112427	22.4885776769058	20.3540052803294	20.186245007542	-0.310529930171762	9.01436052399105	0.0106322702959043	0.16048551435081	0.308903677015699	7.61860117458357	-0.013595337380235	0.173771438687981	35.1124428803462	0	20.3540052803294	13.0019046840278	0.00341296928327645	5.10734463276836	92.4436073012097	35.1124428803462	27.3528781793842	67.4828197435813
fb_rec20p_per4	3	20	6.66666666666667	JAR_FilterBank	7	110	1	2	292	274	23	0	0	0.0149253731343284	0.0839416058394161	0	0	0.0256410256410256	0	2.79765253350505	11.3541562185883	25.2496911128475	20.0840939643391	0.134100192166478	3.70398560714718	0.00126502748442816	0.204065192748088	0.048117562009181	2.52548958879882	0.00702887751421269	0.183963171780826	36.8535304941959	0	25.2496911128475	10.9331267847032	0.0248756218905473	52.3664122137405	106.593020992198	36.8535304941959	46.5590062111801	69.4471781932586
fb_rec20p_per4	3	20	6.66666666666667	JAR_FilterBank	7	110	1	2	242	284	38	0	0	0.0614525139664804	0.133802816901408	0	0.0408163265306122	0.0434782608695652	0.0714285714285714	3.6604235748527	13.6733781052838	17.6279170763042	18.6932731025688	0.0049490225083259	5.34892575899599	0.0100447502273918	0.149499099443496	0.512504044701514	4.2855880074994	0.021579457202325	0.146155285371309	29.0847424911268	0	17.6279170763042	12.4763816699314	0.0558659217877095	8.83018867924529	103.416657970549	29.0847424911268	20.4578088578089	75.4133930405559
fb_rec20p_per4	3	20	6.66666666666667	JAR_FilterBank	7	110	1	4	534	599	32	0	0	0.0410677618069815	0.0534223706176962	0	0.0555555555555556	0	0.0408653846153846	3.26822540397976	13.4374407397369	23.530121932706	14.6914914004983	-0.0319207022444098	2.61941033867901	-0.000521726222986336	0.17207464790795	0.187696315034989	5.53314862892941	0.00216750632141648	0.148869361085175	27.7782820098278	0	23.530121932706	10.7113638594216	0.00205338809034908	50.2529510961214	72.2753515951462	27.7782820098278	48.2257336343115	49.8996601026829
fb_rec20p_per4	3	20	6.66666666666667	JAR_FilterBank	7	110	1	4	428	667	74	0	0	0.00719424460431655	0.110944527736132	0	0	0	0.00326797385620915	4.26617416107473	15.820269092154	25.4184420864447	20.1073082564709	0.148613024912146	4.61326809033684	8.94027296811481e-05	0.216885727174853	-0.00368169574582666	1.0069632213439	0.00180887284896175	0.14456141233494	39.2541466432396	0	25.4184420864447	9.57852968104559	0.00959232613908873	55.8808777429467	130.808708745583	39.2541466432396	51.3706666666667	68.1739572129103
fb_rec20p_per4	3	20	6.66666666666667	JAR_FilterBank	7	110	1	2	504	711	37	0	0	0.00399201596806387	0.0520393811533052	0	0.0208333333333333	0	0.00248138957816377	3.79894536287816	14.2447699372078	26.9406201503851	17.3818699701044	-0.0435575006059929	3.63842402172948	0.00117928390453346	0.154405426294765	-0.000948978140363696	3.11604365948297	0.00099296101369257	0.155088527765106	36.8419280452151	0	26.9406201503851	6.86289445121507	0.0159680638722555	38.4632768361582	115.551638286114	36.8419280452151	55.9823008849558	46.4937317475347
fb_rec20p_per4	3	20	6.66666666666667	JAR_FilterBank	7	110	1	2	273	352	40	0	0	0.048	0.113636363636364	0	0.0930232558139535	0.0526315789473684	0.0327868852459016	3.7835182393427	14.7381049995245	19.5951474426691	17.2799654691238	0.0705829654501623	5.80079594414846	-0.0126715995912393	0.142127273584802	-0.94729582418563	17.4994951791463	-0.0102445698136949	0.145970803904885	27.227206705465	0	19.5951474426691	8.52828930325105	0.036	-11.7348703170029	97.5020913970028	27.227206705465	-1.72039072039072	74.9109848264864
fb_rec20p_per4	3	20	6.66666666666667	JAR_FilterBank	7	110	1	6	414	628	58	0	0	0.0200501253132832	0.0923566878980892	0	0.0731707317073171	0.0285714285714286	0.0113636363636364	5.18300093252973	20.2467875784651	27.2529768085996	20.7462187321926	0.297593838558062	4.95591843493948	0.00732172220537256	0.159239470854564	0.119563295774918	2.18566718412367	0.00878725450616065	0.135349225605774	42.1017508081681	0	27.2529768085996	11.3881581258167	0.0225563909774436	18.8543046357616	102.520597605293	42.1017508081681	41.394495412844	71.6132273077732
fb_rec20p_per4	3	20	6.66666666666667	JAR_FilterBank	7	110	1	5	486	672	54	0	0	0.0125786163522013	0.0803571428571429	0	0.117647058823529	0	0.00547945205479452	3.85200769679543	15.3487877511346	28.1700137705433	18.540536989022	0.247350937461042	4.94273228664954	-0.00495362208518188	0.174390114320147	0.0186879804131272	1.57997543503001	-0.00725452799719631	0.167290732268465	38.6684215737062	0	28.1700137705433	9.12958188267834	0.00419287211740042	31.3709923664122	83.5539054776817	38.6684215737062	47.3333333333333	55.9844278837726
fb_rec20p_per4	3	20	6.66666666666667	JAR_FilterBank	7	110	1	3	334	564	49	0	0	0.0274390243902439	0.0868794326241135	0	0.0652173913043478	0.0375	0.00980392156862745	4.45035649584261	16.1699112786326	19.7289804866044	19.2338790881873	0.0222539876443832	6.66727688731461	0.00831622606808615	0.162268589100592	-0.308864043283942	4.36290750433762	0.000344545549414068	0.138561442265793	32.653946794523	0	19.7289804866044	14.0098257164381	0.024390243902439	24.3093922651934	122.348332362635	32.653946794523	37.9361288530964	76.9245068185484
fb_rec20p_per4	3	20	6.66666666666667	JAR_FilterBank	7	110	1	5	516	956	78	0	0	0.0148305084745763	0.0815899581589958	0	0	0.0517241379310345	0.0105820105820106	4.05388166355093	15.5374386033924	21.3667368464445	18.2894351453508	-0.00138815891232205	4.91989984494752	0.00879947120659389	0.146571623875889	0.143787232646644	3.85657605813032	0.00373646304554866	0.145363124389399	36.2967935314355	0	21.3667368464445	9.8566070733064	0.0105932203389831	28.4592274678112	93.6541816856068	36.2967935314355	49.6018518518519	50.9713426268575
fb_rec20p_per4	3	20	6.66666666666667	JAR_FilterBank	7	110	1	5	365	647	53	0	0	0.00611620795107034	0.0819165378670788	0	0.0217391304347826	0	0.00442477876106195	3.27070629469466	14.1746966232119	23.449771422147	19.5617034160442	-0.228206530524158	5.15779420738975	0.0109363669555283	0.176264651877705	-0.038220230813594	1.74191314848022	0.00354277647385728	0.127712134114029	40.8827602052445	0	23.449771422147	8.54711855719972	0.00305810397553517	33.2519561815336	95.5498067616369	40.8827602052445	39.9577464788732	61.6929445702237
fb_rec20p_per4	3	20	6.66666666666667	JAR_FilterBank	7	110	1	3	464	519	47	0	0	0.0158730158730159	0.0905587668593449	0	0	0.0344827586206897	0.0157728706624606	3.26787894575778	12.2131743684758	20.7919204081966	15.925792150551	-0.328568427688754	4.24867668950785	-0.00991102285457157	0.138761535686708	-0.061517924888994	3.81570562687849	-0.00444892687036719	0.134847261558873	27.1038984800207	0	20.7919204081966	9.40075524234914	0.0158730158730159	1.31496062992126	104.520937818242	27.1038984800207	23.0246913580247	48.1647007437735
fb_rec20p_per4	3	20	6.66666666666667	JAR_FilterBank	7	110	1	5	480	572	36	0	0	0.0148883374689826	0.0629370629370629	0	0.161290322580645	0.0256410256410256	0	2.28839122100996	7.90495277713658	28.2500987524687	17.9266647863888	0.199283951741486	4.03337035367425	0.00680253658903095	0.143249015237025	-0.048720467204029	1.37214550687395	0.00793051167823113	0.137706188029862	38.7096465016582	0	28.2500987524687	10.4902891479836	0.00248138957816377	42.8303249097473	71.2012410560605	38.7096465016582	53.7083333333333	52.4021239413025
fb_rec20p_per4	3	20	6.66666666666667	JAR_FilterBank	7	110	1	3	438	458	42	0	0	0.0504201680672269	0.091703056768559	0	0.2	0.0285714285714286	0.039426523297491	1.81236924889094	6.16934393441009	21.7422695652466	17.9597087132573	0.697290476922261	7.09822804195127	-0.00257525344236781	0.154680013713806	0.528390711314852	7.43549990089544	-0.000367789771327503	0.146584821870784	28.2179759148445	0	21.7422695652466	8.2106913466711	0.00560224089635854	15.5444191343964	83.0857630825042	28.2179759148445	14.3604108309991	62.4066528544817
fb_rec20p_per4	3	20	6.66666666666667	JAR_FilterBank	7	110	1	2	331	343	28	0	0	0.00833333333333333	0.0816326530612245	0	0	0.0169491525423729	0	2.31642623331542	8.86809524036537	26.0363329440756	18.8922027387262	0.749978974029767	4.43881076851878	0.0066931606430034	0.147224482808965	0.099537358387775	3.4834377536025	0.00355140281132256	0.14795680810685	36.8789616532165	0	26.0363329440756	10.9192723177238	0.0208333333333333	32.4880952380952	82.3081931755505	36.8789616532165	50.4010989010989	50.1213565810631
fb_rec20p_per4	3	20	6.66666666666667	JAR_FilterBank	7	110	1	3	441	628	34	0	0	0.029925187032419	0.054140127388535	0	0	0.0535714285714286	0.0289389067524116	2.80248318338416	9.79066224793753	25.1542433272813	17.6150639422649	0.117531439621257	2.98528110619367	-0.00374231573744801	0.148076592884142	-0.853966190703289	9.04684557377666	-0.0136175332520438	0.244243340184102	34.671130262516	0	25.1542433272813	5.7325519125328	0.027431421446384	20.3322475570033	78.1065928031187	34.671130262516	37.8141856925419	62.684150353601
fb_rec20p_per4	3	20	6.66666666666667	JAR_FilterBank	7	110	1	2	386	532	40	0	0	0.0157232704402516	0.075187969924812	0	0	0.0615384615384615	0.00485436893203883	2.75702498724117	10.6875964330647	24.5672753428716	17.3780700762799	-0.135540876639777	3.64837637945931	-0.00106332891209252	0.149897566391782	0.337684774575739	3.62593102269713	-0.0082501988573344	0.135470370225155	37.4037200049189	0	24.5672753428716	5.43300112433005	0.0157232704402516	26.0390625	88.6006809393463	37.4037200049189	42.9657794676806	57.2789708695508
fb_rec20p_per4	3	20	6.66666666666667	JAR_FilterBank	7	110	1	5	454	641	58	0	0	0.0112612612612613	0.0904836193447738	0	0.05	0	0.00584795321637427	2.90682514794047	10.7168311602207	26.6011884233734	18.2442391483748	-0.164094172133975	4.16136149208688	0.00268996108853807	0.164918566541477	0.0302959467566115	1.03837110323815	-0.00199487172763938	0.162410777827079	36.5370732112412	0	26.6011884233734	7.49702667336803	0.00900900900900901	36.3642172523962	75.1771556627832	36.5370732112412	51.621359223301	49.7011245457925
fb_rec20p_per4	3	20	6.66666666666667	JAR_FilterBank	7	110	1	3	255	470	110	0	0	0.0684931506849315	0.234042553191489	0	0.172413793103448	0.0408163265306122	0.0252100840336134	5.31012365764092	20.8411605517289	16.8249762687284	21.7685449896886	0.748789065682282	15.9004921533822	-0.0126448998712823	0.254578425774524	0.957835063484823	13.8928705266947	-0.00876361219235445	0.171373546996911	38.0097714893598	0	16.8249762687284	12.9338130224957	0.0593607305936073	25.8454545454545	171.801797459373	38.0097714893598	33.769696969697	108.950963698176
fb_rec20p_per4	3	20	6.66666666666667	JAR_FilterBank	7	110	1	3	446	575	51	0	0	0.0253807106598985	0.088695652173913	0	0.0666666666666667	0.103448275862069	0.00928792569659443	4.43971868298334	17.6185808164187	25.7541002944551	16.8093084736982	0.0450064375341675	4.60730325337767	0.0138456947163464	0.142049513803541	-0.667235111814276	14.6625409020799	0.0117835633883879	0.141742205048152	34.5759713148219	0	25.7541002944551	8.50631692993406	0.0101522842639594	48.9160839160839	115.316301267655	34.5759713148219	64.0230547550432	64.484434102414
fb_rec20p_per4	3	20	6.66666666666667	JAR_FilterBank	7	110	1	5	529	909	60	0	0	0.0173076923076923	0.066006600660066	0	0.125	0	0.00710900473933649	4.61526376679906	19.0231329400385	26.6075706329501	17.4949077199945	-0.0112572628052239	4.61462999555961	0.000692835305433874	0.155258206544834	-0.313074794385651	8.08593966590673	0.00306188509931104	0.146028123511609	37.9678005552584	0	26.6075706329501	11.3004018416843	0.00192307692307692	44.4394110985277	103.369126500542	37.9678005552584	50.1113043478261	57.3636897371129
fb_rec20p_per4	3	20	6.66666666666667	JAR_FilterBank	7	110	1	3	498	732	109	0	0	0.0464646464646465	0.148907103825137	0	0.0754716981132075	0.025	0.0349854227405248	6.13370168420531	25.2102723627972	23.2191938253718	20.2457032714935	0.660646480667451	8.2518571242677	0.00111016234590103	0.291946548847442	0.346612383875545	5.25336663232519	0.000924922994683632	0.152162382609742	34.5889488874007	0	23.2191938253718	15.5442417376888	0.00606060606060606	52.9609261939219	133.597893028856	34.5889488874007	61.2862842892768	83.8783490324469
fb_rec20p_per4	3	20	6.66666666666667	JAR_FilterBank	7	110	1	2	501	552	48	0	0	0.0332594235033259	0.0869565217391304	0	0.0540540540540541	0.0810810810810811	0.0261780104712042	5.97539395047541	24.6142718425541	26.9866455313961	16.5943285368465	0.0323655552097054	4.00334106440672	-0.00638978642434285	0.199060733368572	0.96186787174687	11.1942488883503	-0.000268254053589344	0.141413679709022	32.9488378329293	0	26.9866455313961	13.5058538918831	0.00665188470066519	58.7542213883677	93.8753453083956	32.9488378329293	57.6153846153846	57.0727292216069
fb_rec20p_per4	3	20	6.66666666666667	JAR_FilterBank	7	110	1	0	248	354	89	0	0	0.112994350282486	0.251412429378531	0	0.225	0.0638297872340425	0.304347826086957	6.06958138281873	23.6041526471991	11.739853443805	20.3121947826927	0.635634953872038	10.4038248759243	0.00501540979895611	0.400554997440056	0.103749575064093	7.13663129801601	-0.00593763563628538	0.164217773095681	25.7117562637019	0	11.739853443805	17.2407904324328	0.0734463276836158	15.7714285714286	115.444082237891	25.7117562637019	3.83528265107212	76.0367313757853
fb_rec20p_per4	3	20	6.66666666666667	JAR_FilterBank	7	110	1	1	259	372	22	0	0	0.0398230088495575	0.0591397849462366	0	0	0	0.0212765957446809	2.57454056102037	9.65932684613798	21.6649770782744	15.5100789191031	-0.00632245660617634	3.20459508392207	-0.0102284751172445	0.133692396196835	0.00890945002235045	3.33558699922988	-0.0146620026925385	0.132746188153473	30.7574033163788	0	21.6649770782744	7.45039536797802	0.0309734513274336	65.7190082644628	105.352648253574	30.7574033163788	54.5842696629214	62.8402708314036
fb_rec20p_per4	3	20	6.66666666666667	JAR_FilterBank	7	110	1	4	417	598	29	0	0	0.00995024875621891	0.048494983277592	0	0	0.0175438596491228	0.00364963503649635	3.19399793708362	12.4832846444691	29.4295079232073	18.1767489976064	-0.132623613411654	2.41438992904047	-0.00620678462106081	0.144177510852025	0.0802807730765995	1.9081293973171	-0.00418869796072609	0.131029327575674	40.0796249090287	0	29.4295079232073	8.60817804145688	0.00497512437810945	21.182905982906	89.9893204190697	40.0796249090287	31.8635689569946	58.6677712797019
fb_rec20p_per4	3	20	6.66666666666667	JAR_FilterBank	7	110	1	6	495	744	52	0	0	0.0357142857142857	0.0698924731182796	0	0.0740740740740741	0.0535714285714286	0.0303030303030303	3.10012031261399	12.0497630471315	22.9257686851384	16.6767516868547	-0.0184344203942521	4.27828803598351	-0.0126119754569366	0.151813845048031	-0.13096610416372	6.2730610844825	-0.0164783915006651	0.157572986825556	32.1186985199404	0	22.9257686851384	8.82102106976868	0.00223214285714286	22.2289655172414	76.0541933101718	32.1186985199404	29.329945482866	63.1078680738428
fb_rec20p_per4	3	20	6.66666666666667	JAR_FilterBank	7	110	1	2	351	495	44	0	0	0.0431893687707641	0.0888888888888889	0	0.0294117647058824	0.0444444444444444	0.0390243902439024	2.31999091839714	8.63031342866133	17.9798744987138	15.8601525723892	0.052449343529065	4.40629706934183	-0.00374302546657791	0.145455693460107	0.780967691934859	6.56574170258821	-0.0092263313279871	0.156295850601269	26.0141180439478	0	17.9798744987138	8.04487489154442	0.0199335548172757	34.3102040816327	108.127555222165	26.0141180439478	34.251012145749	55.3368266080799
fb_rec20p_per4	3	20	6.66666666666667	JAR_FilterBank	7	110	1	3	521	865	64	0	0	0.0337301587301587	0.0739884393063584	0	0.0625	0	0.0380710659898477	3.19634172868754	12.9257735962578	22.5567454724585	16.5414288454217	-0.303917443881313	4.05830120118421	-0.000490393734229658	0.141327810097558	0.231279588046191	3.36955524136611	0.00275049154509152	0.140001593161229	32.8305340101968	0	22.5567454724585	7.81489586924181	0.00396825396825397	18.9964328180737	90.6703145447346	32.8305340101968	38.6252771618625	61.228818048736
fb_rec20p_per4	3	20	6.66666666666667	JAR_FilterBank	7	110	1	4	270	418	28	0	0	0	0.0669856459330144	0	0	0	0	2.18987597165115	7.7399866056356	22.2913612064351	17.7836756535568	-0.360359740139595	3.39698825376874	0.00791869162016124	0.135817216181109	-0.156227070100762	1.85646909004143	-0.000343273091818281	0.143909910530462	39.1881955600427	0	22.2913612064351	6.53967968588384	0.0348258706467662	31.4607843137255	138.314968095949	39.1881955600427	28.9673202614379	74.4764549778065
fb_rec20p_per4	3	20	6.66666666666667	JAR_FilterBank	7	110	1	4	309	427	42	0	0	0.0142348754448399	0.0983606557377049	0	0	0	0.021978021978022	5.01418983886602	20.1992008685477	25.7249317578237	17.6859279468397	-0.0946618024184437	3.3896117564242	-0.0122355265774302	0.176987725610538	0.110536567697823	5.16567538966158	0.00056314926403603	0.152599353016695	37.4193926167037	0	25.7249317578237	11.4684918711366	0.0213523131672598	6.29951690821256	97.8619235313096	37.4193926167037	36.815668202765	65.8066973798074
fb_rec20p_per4	3	20	6.66666666666667	JAR_FilterBank	7	110	1	3	405	547	58	0	0	0.0253164556962025	0.106032906764168	0	0.0697674418604651	0.0597014925373134	0.0105633802816901	4.78535830824318	20.0114200903736	24.7085243282656	18.1139873236569	0.222445980065391	4.92573721898621	-0.00225087954548606	0.163848452679846	-0.253330731371119	8.24774764850467	-0.00552305924515244	0.13505828900037	33.9486186084168	0	24.7085243282656	9.42098878204626	0.0126582278481013	12.0075901328273	96.1805966222658	33.9486186084168	42.0055096418733	53.4860953940295
fb_rec20p_per4	3	20	6.66666666666667	JAR_FilterBank	7	110	1	3	266	501	72	0	0	0.0613026819923372	0.143712574850299	0	0.159420289855072	0.0263157894736842	0.0253164556962025	4.02169675567498	15.6907024347752	21.49393344563	18.2417775134303	-0.0754802012374623	5.68968749224938	-0.00311161031276054	0.198345541176641	-0.298842227890188	4.55865832149563	0.00579466133189512	0.144958043326107	36.3297151064352	0	21.49393344563	11.7088370294844	0.0306513409961686	57.075	137.5933109082	36.3297151064352	45.0515463917526	99.7171513961885
fb_rec20p_per4	3	20	6.66666666666667	JAR_FilterBank	7	110	1	3	418	509	24	0	0	0.00840336134453781	0.0471512770137525	0	0.0681818181818182	0	0	2.10625509487252	6.95283183484296	29.5821215231849	17.2436456169881	-0.0431898354347691	2.13626902626247	-0.0051751015512997	0.138150015903902	-0.188452492954916	2.73457280666727	-0.00108496322865118	0.121311507101197	39.7494656174464	0	29.5821215231849	4.53821668680287	0	72.2470119521912	108.192640443533	39.7494656174464	72.2935779816514	69.9658947704081
fb_rec20p_per4	3	20	6.66666666666667	JAR_FilterBank	7	110	1	5	503	736	65	0	0	0.0461847389558233	0.0883152173913044	0	0.1	0	0.038860103626943	4.42553815448244	18.2442561346483	25.8919482152477	18.6860984000043	0.353439185001864	5.2063712268058	0.00310237028984907	0.150927437667027	-0.21478397649563	7.76558665375322	0.00224218816059717	0.159371538699942	35.108802128101	0	25.8919482152477	11.1058527779659	0.00602409638554217	15.2524407252441	90.778256048842	35.108802128101	35.8886255924171	64.7300582448897
fb_rec20p_per4	3	20	6.66666666666667	JAR_FilterBank	7	110	1	4	353	529	35	0	0	0.0232558139534884	0.0661625708884688	0	0.0285714285714286	0.0410958904109589	0.018348623853211	3.81343125242275	15.2714617469731	25.2865968865485	18.2511180506584	0.271375249132834	3.42038514485173	-0.0061244461304091	0.196014440489994	0.490798533796664	5.64195736461735	-0.00689178980014822	0.142413302022797	36.3022260133672	0	25.2865968865485	9.91760835137397	0.0232558139534884	-4.1779497098646	97.3828020391562	36.3022260133672	12.935443668993	64.0339977491825
fb_rec20p_per4	3	20	6.66666666666667	JAR_FilterBank	7	110	1	5	471	629	60	0	0	0.0393700787401575	0.095389507154213	0	0.0769230769230769	0.0416666666666667	0.0357142857142857	3.13227808333194	12.3365273076274	20.5143061392489	17.0859726048302	0.336575721714887	4.32120672149688	-0.000534391569556302	0.132219372616642	0.923672583167542	10.9315026044341	0.0182219605918819	0.208799174324351	30.748388092314	0	20.5143061392489	9.28838746122573	0.0131233595800525	29.2582781456954	100.369893907488	30.748388092314	59.5821344140493	73.3017128551921
fb_rec20p_per4	3	20	6.66666666666667	JAR_FilterBank	7	110	1	3	378	659	32	0	0	0.00890207715133531	0.0485584218512898	0	0.03125	0.0133333333333333	0.00440528634361234	2.99035855332796	11.1715887239432	23.4843036461086	17.7353555988845	0.22565051931346	2.87911274524205	-0.00652903877234426	0.14410037592069	-0.178175746316606	3.48396824768349	0.00232359877043891	0.129120464599167	38.7403956687587	0	23.4843036461086	7.2470863059254	0.0118694362017804	21.3395348837209	81.569337972665	38.7403956687587	35.1549295774648	64.4433951388878
fb_rec20p_per4	3	20	6.66666666666667	JAR_FilterBank	7	110	1	4	459	531	16	0	0	0.00888888888888889	0.0301318267419962	0	0	0	0.0112359550561798	1.57950637311981	4.84119726999891	24.4515722535792	15.5948638125156	-0.00866131827426501	2.42603353385238	0.0115421025950156	0.151163646355465	0.0145879386546507	4.38656715345645	0.00888747420542464	0.152556252367656	28.3085857905503	0	24.4515722535792	6.56107332378179	0.0155555555555556	40.007619047619	72.8991770747465	28.3085857905503	41.1331719128329	48.8245739183929
fb_rec20p_per4	3	20	6.66666666666667	JAR_FilterBank	7	110	1	3	380	306	46	0	0	0.0235294117647059	0.150326797385621	0	0.09375	0	0.0158730158730159	3.8380119709526	14.6671888349086	28.098520714197	22.3669201161963	-0.571546563741396	10.6125209982055	-0.00732101434538284	0.174348564569271	0.218762072035828	4.64761236959253	-0.00477343788964463	0.141028520874073	38.7814641519394	0	28.098520714197	11.7781393006235	0	12.3918918918919	125.314229318258	38.7814641519394	32.0744186046512	85.8783863363216
fb_rec20p_per4	3	20	6.66666666666667	JAR_FilterBank	7	110	1	3	274	418	56	0	0	0.0239234449760766	0.133971291866029	0	0.0212765957446809	0.0294117647058824	0.024390243902439	3.32378780425289	13.353259439577	19.6769934233515	19.5366689827701	0.6369589831233	6.48640798838247	-0.00202907623476382	0.141477263425115	0.903317627892061	6.78607676475421	-0.00656925376993696	0.140603732637733	39.6636300522159	0	19.6769934233515	9.26587359508892	0.0287081339712919	35.2817955112219	97.0457773051877	39.6636300522159	36.1971830985916	55.4242489159332
fb_rec20p_per4	3	20	6.66666666666667	JAR_FilterBank	7	110	1	5	431	576	41	0	0	0.0235294117647059	0.0711805555555556	0	0.0277777777777778	0.0555555555555556	0.0155038759689922	3.99930948590059	14.4830357601238	24.2084634986642	20.8133169634967	0.262469303995138	9.92250476214779	0.00187652595871551	0.132017565882555	-0.282778987241436	7.93651513131826	0.00283570667469334	0.141483143307769	38.8373331548832	0	24.2084634986642	11.849335433842	0.00588235294117647	15.3040421792619	105.852644726543	38.8373331548832	32.4092409240924	66.417833870463
fb_rec20p_per4	3	20	6.66666666666667	JAR_FilterBank	7	110	1	5	633	1011	76	0	0	0.025518341307815	0.0751730959446093	0	0.0625	0.0535714285714286	0.020952380952381	4.78705109835106	17.7874388813909	25.2236325948559	17.9731567804232	0.0495295974391507	3.90633616426092	-0.00383595623538729	0.171307213427729	0.124542932401265	10.2464092789522	-0.00876614023108803	0.135309154149972	36.2656070080977	0	25.2236325948559	7.86689406476694	0.00318979266347687	60.8	81.1016563660604	36.2656070080977	74.4804088586031	53.2535394311833
fb_rec20p_per4	3	20	6.66666666666667	JAR_FilterBank	7	110	1	5	400	708	68	0	0	0.0279898218829517	0.096045197740113	0	0.0612244897959184	0.0350877192982456	0.0204081632653061	4.46649998745251	16.4374510911732	20.0887494896067	17.9053948592228	0.0996806330799368	6.13477316182387	-0.000183293228597221	0.139913880305304	-0.0695270865579312	5.68279409426212	-0.0109371110710418	0.13429033966381	31.3916409198219	0	20.0887494896067	8.64193633632198	0.0101781170483461	-5.78540772532189	121.969392393105	31.3916409198219	18.2705882352941	72.2772257525483
fb_rec20p_per4	3	20	6.66666666666667	JAR_FilterBank	7	110	1	5	341	566	49	0	0	0.0246153846153846	0.0865724381625442	0	0.0487804878048781	0.0470588235294118	0.0099009900990099	4.38696221311695	16.0825609302088	24.931644789411	18.8717714552081	-0.0348693138652415	4.45992453591996	0.00845859482649022	0.11725555218307	-0.12810801068848	2.31051209296022	0.00464231785787904	0.10275245399063	38.2203711688213	0	24.931644789411	9.65039090284609	0.0123076923076923	36.1323529411765	97.4614668209722	38.2203711688213	46.4195804195804	74.0641175603867
fb_rec20p_per5	5	20	4	FilterBank	7	110	1	2	315	439	91	0	0	0.0301003344481605	0.207289293849658	0	0.109090909090909	0.0196078431372549	0.00531914893617021	7.02935864925016	21.5610476447892	21.7554601162402	20.8939585858096	-0.490337013330109	8.61344308454797	0.00802205874859882	0.247887997306687	0.445130929764897	3.99632018088224	-0.00121319744590806	0.135921656274997	36.9270321937865	0	21.7554601162402	11.0056094524443	0.0468227424749164	-3.8407960199005	141.101525244404	36.9270321937865	52.4107142857143	63.9678385518396
fb_rec20p_per5	5	20	4	FilterBank	7	110	1	3	390	424	64	0	0	0.0837837837837838	0.150943396226415	0	0.108695652173913	0.0652173913043478	0.0654545454545455	7.53802842235731	25.6190297987668	24.5647040243777	19.4577784350508	-0.266334043468584	5.89211499839542	0.00671291088501796	0.174109361318366	0.438231217169807	9.92646325648138	0.00533982570138991	0.154776590184254	29.9920689275863	0	24.5647040243777	12.6328023154793	0.0162162162162162	32.258064516129	102.555665764131	29.9920689275863	36.0542080276219	57.9010187438092
fb_rec20p_per5	5	20	4	FilterBank	7	110	1	2	281	312	46	0	0	0.0429184549356223	0.147435897435897	0	0.0425531914893617	0.0294117647058824	0.0211267605633803	6.20952104916362	20.7409597927498	26.4753140067905	19.8655393487987	0.247968428565532	4.60643464986423	-0.0322696966505809	0.357833174649863	0.352363341533676	3.15604240360581	-0.0139436932771205	0.132049754797829	39.0998350039497	0	26.4753140067905	12.214599983672	0.0386266094420601	79.1304347826087	147.463360402575	39.0998350039497	67.0909090909091	88.398530868676
fb_rec20p_per5	5	20	4	FilterBank	7	110	1	5	564	912	117	0	0	0.0492424242424242	0.128289473684211	0	0.111111111111111	0.0909090909090909	0.0387243735763098	7.09290471956675	25.906983512685	21.2287832539464	16.9922201348951	-0.0737803860757754	6.28419182539693	0.0123050473881191	0.287983366993318	0.0842178303776786	8.13046507468628	0.00502696785329925	0.161356487080506	31.087508949087	0	21.2287832539464	11.7095782674481	0.0113636363636364	48.8404133180253	78.1447582275978	31.087508949087	53.0827394612876	51.7258880429722
fb_rec20p_per5	5	20	4	FilterBank	7	110	1	4	408	691	105	0	0	0.0594059405940594	0.151953690303907	0	0.0909090909090909	0.0909090909090909	0.0471380471380471	6.22945708132305	19.7574874329422	18.2106071892704	18.0630615190235	-0.107900947127659	6.28445178709352	0.00419551905073825	0.190083795560777	0.517144161641922	12.0281693195089	0.00386466406518879	0.142180724143163	28.0509167307653	0	18.2106071892704	9.46589038697121	0.0272277227722772	39.0257186081694	99.279072246047	28.0509167307653	33.5418604651163	55.3134286177405
fb_rec20p_per5	5	20	4	FilterBank	7	110	1	4	379	537	67	0	0	0.0537634408602151	0.124767225325885	0	0.0833333333333333	0.0166666666666667	0.053921568627451	6.45045508741948	24.1470271150246	22.4189497064675	18.6149508930846	0.207462536162148	3.94281909109502	0.00217884916915554	0.157100728439376	0.153376837331677	9.01306957295692	-0.00172199671036418	0.212353431854531	33.4560265286044	0	22.4189497064675	13.2148711833256	0.0403225806451613	31.6545105566219	89.5182170104563	33.4560265286044	34.3835616438356	62.4064121599698
fb_rec20p_per5	5	20	4	FilterBank	7	110	1	1	248	320	46	0	0	0.0213903743315508	0.14375	0	0.0566037735849057	0	0.0114942528735632	5.34551885136174	17.1454962598204	21.9962133956616	18.1865090081098	0.392670681502446	5.38329741741405	-0.00239288015211377	0.134889222615828	0.00300376098192631	1.39423379543573	-4.93553036341538e-05	0.126966028715508	39.7795193112238	0	21.9962133956616	11.4798233214734	0.0802139037433155	-22.1960784313725	108.517222857489	39.7795193112238	33.0756302521008	75.1237577424988
fb_rec20p_per5	5	20	4	FilterBank	7	110	1	3	397	473	77	0	0	0.0576271186440678	0.162790697674419	0	0	0.0606060606060606	0.0657276995305164	4.25278426328986	14.9908222769073	17.3605994408558	17.2533976062235	0.276029850805972	6.37415480035352	0.0103073312720278	0.135869571761496	-0.963115040744065	7.98765768750583	0.0171452475707852	0.15095879316177	27.7847552051593	0	17.3605994408558	9.12925092948413	0.0203389830508475	10.9387755102041	82.8821637098385	27.7847552051593	26.7463203463203	68.0571158587401
fb_rec20p_per5	5	20	4	FilterBank	7	110	1	5	420	471	110	0	0	0.113695090439276	0.233545647558386	0	0.0909090909090909	0.106666666666667	0.136792452830189	5.68862054098775	20.6401429095898	15.8887738067132	20.1498412177506	-0.794541069118085	12.2716241396883	-0.0052578179524955	0.373070028352579	0.140883727089235	18.7065488885389	0.0167620216204971	0.139637388555633	23.3766198695511	0	15.8887738067132	9.72178047770992	0.00775193798449612	0.493946731234867	75.0530432955866	23.3766198695511	2.22344827586207	67.3904021318091
fb_rec20p_per5	5	20	4	FilterBank	7	110	1	3	396	593	71	0	0	0.0482233502538071	0.11973018549747	0	0.0571428571428571	0.0697674418604651	0.0426356589147287	6.01287788581478	20.7537402168389	22.9545651989153	17.8818705892186	-0.131829304152494	4.43480797213862	0.00978651237141265	0.159256742602399	-0.428324122310301	5.27557889480041	0.0203869410528883	0.175045509541517	32.2576978160521	0	22.9545651989153	10.7303540810066	0.0101522842639594	22.2159292035398	86.8904263984891	32.2576978160521	34.6071765816808	60.8483111396889
fb_rec20p_per5	5	20	4	FilterBank	7	110	1	2	474	538	59	0	0	0.0493273542600897	0.109665427509294	0	0.03125	0.0754716981132075	0.0495626822157434	5.50126867302849	19.6042738258506	22.0615571239136	16.4343287187153	-0.201138266804146	5.10457150676218	0.00967983954054294	0.160896441962967	-0.140557059811785	13.7498197375409	0.00474015839135117	0.151177271282641	27.3391303440062	0	22.0615571239136	7.41800053834477	0.00672645739910314	13.4679611650485	81.3159546297812	27.3391303440062	25.6699210337401	62.9763275238433
fb_rec20p_per5	5	20	4	FilterBank	7	110	1	1	279	380	101	0	0	0.0875576036866359	0.265789473684211	0	0.102564102564103	0.0545454545454545	0.0210526315789474	7.30778423332355	25.6376432766026	16.5490801728869	20.3326025646565	0.191050036632077	13.550470441037	0.00761965682343707	0.286803656599367	-0.316713643676993	8.06630768082917	-0.0139369754061969	0.199352544715875	34.6234016076973	0	16.5490801728869	12.0494602301323	0.0368663594470046	-22.0634005763689	126.148213191043	34.6234016076973	9.98571428571428	70.1580658796186
fb_rec20p_per5	5	20	4	FilterBank	7	110	1	3	304	303	57	0	0	0.0672645739910314	0.188118811881188	0	0.0967741935483871	0.127659574468085	0.0075187969924812	6.10832883465514	21.6420517191186	21.2050272083804	19.9312698796571	0.0921409059328527	9.44659846415513	-0.0126643016696081	0.226128574363874	0.523927469436605	4.70698592945763	-0.00555823892605365	0.177524115225645	33.5054350023203	0	21.2050272083804	10.5776381407577	0.0403587443946188	22.4822695035461	107.490931693118	33.5054350023203	51.3957115009747	71.0698910890477
fb_rec20p_per5	5	20	4	FilterBank	7	110	1	3	460	560	98	0	0	0.0614035087719298	0.175	0	0.170212765957447	0.0188679245283019	0.0402476780185759	7.96291921039506	27.0765495984923	24.9568228957539	21.040558253304	-0.202044182143521	6.2443512513174	-0.00894593386606332	0.26185690105954	0.0431988942723137	5.64964015363082	-0.00917981240751676	0.144143956833925	34.0442809961829	0	24.9568228957539	13.0309145207983	0.0131578947368421	63.4749034749035	114.191203238221	34.0442809961829	51.7727621483376	70.9917510993063
fb_rec20p_per5	5	20	4	FilterBank	7	110	1	3	465	948	135	0	0	0.0200892857142857	0.142405063291139	0	0.0263157894736842	0.0151515151515152	0.0204678362573099	5.96291186186147	20.6016136486511	19.5965502385154	19.9644921901947	0.245645447961963	6.04070222264553	0.00235508937747479	0.24754448084772	-0.252634331908408	4.54601187109836	0.00419065236788408	0.139011888901208	37.6957720833154	0	19.5965502385154	9.30337233622696	0.00669642857142857	21.8854625550661	104.25701898065	37.6957720833154	40.4529411764706	64.2275867188275
fb_rec20p_per5	5	20	4	FilterBank	7	110	1	2	304	600	140	0	0	0.0975609756097561	0.233333333333333	0	0.116666666666667	0.122448979591837	0.0729166666666667	9.11596339908846	30.2992313955798	16.0727599168513	20.5734895472106	-0.0522893383597558	12.0054111210673	-0.00402731483294948	0.183039703258224	-0.5524296400514	17.5356045240122	0.00740002085528768	0.185688253554127	33.0131498802319	0	16.0727599168513	13.7760683425079	0.0383275261324042	43.7097345132743	118.302895869157	33.0131498802319	51.8363636363636	61.1278439530724
fb_rec20p_per5	5	20	4	FilterBank	7	110	1	1	291	374	65	0	0	0.0338164251207729	0.17379679144385	0	0.0652173913043478	0.0666666666666667	0.00763358778625954	5.95197830914818	21.7253288980053	18.7676013198977	19.9562871078778	-0.319118328625853	10.8966117107183	0.0020060790892638	0.353937476772343	0.651773596827748	12.6054340255491	0.00889667670828328	0.125127843689553	34.1197211577171	0	18.7676013198977	11.1060697714261	0.0434782608695652	72.2548476454294	140.645738510476	34.1197211577171	74.370320855615	88.925214947241
fb_rec20p_per5	5	20	4	FilterBank	7	110	1	4	395	466	80	0	0	0.0540540540540541	0.171673819742489	0	0.0731707317073171	0.025	0.0569105691056911	7.42303477140611	25.7696902867014	25.2304984345722	21.2561455623922	0.735776789403255	6.12510506024541	-0.0149758689441799	0.238861441332196	-1.05900080481789	16.7160126292699	-0.0164969657897646	0.267215444326344	36.964240430122	0	25.2304984345722	12.4862195302449	0.012012012012012	32.5807962529274	111.827667158389	36.964240430122	41.6842105263158	73.0901329284933
fb_rec20p_per5	5	20	4	FilterBank	7	110	1	3	410	490	89	0	0	0.0797720797720798	0.181632653061225	0	0.0810810810810811	0	0.0576923076923077	6.69489058631312	23.2481992460071	19.084352910119	19.1678310839137	0.108363853492787	8.3929326588914	0.00893329929834896	0.195550626219152	0.471488581396371	5.40134806464394	0.01280234894839	0.177040957628305	28.7998340731982	0	19.084352910119	9.90404158944845	0.0113960113960114	48.4060475161987	85.9433476830372	28.7998340731982	63.0066225165563	49.6243719846106
fb_rec20p_per5	5	20	4	FilterBank	7	110	1	2	274	482	88	0	0	0.0700389105058366	0.182572614107884	0	0.133333333333333	0.09375	0.0215827338129496	9.11013420993237	28.6158473766441	19.048854595263	20.0786077211865	-0.759988323946912	9.12306161745753	0.0126524713406164	0.291717994522433	-0.119493907101839	5.9115768213337	0.0065943277353187	0.170918058624929	35.3276475113577	0	19.048854595263	15.6410338057934	0.0466926070038911	35.68	130.516010625271	35.3276475113577	53.193535188216	77.3563022560057
fb_rec20p_per5	5	20	4	FilterBank	7	110	1	2	383	517	64	0	0	0.0389972144846797	0.123791102514507	0	0.125	0.0196078431372549	0.0163934426229508	5.20004791222104	18.0856568487666	25.8151155334026	17.8756860267716	0.450470315167167	4.87925288449345	0.00623130903805195	0.149242152489444	0.212226281152939	3.7774991429701	0.000576206892120798	0.144357519127929	35.1147852073496	0	25.8151155334026	9.61157252596098	0.0139275766016713	25.290060851927	95.2729446714985	35.1147852073496	46.7661016949153	66.8119215454988
fb_rec20p_per5	5	20	4	FilterBank	7	110	1	3	306	313	49	0	0	0.0294117647058824	0.156549520766773	0	0.0645161290322581	0	0.0227272727272727	4.58846869312977	16.4753575151402	22.8933539247355	19.6229597965015	0.328258881742054	7.43691053499608	-0.00857868502984138	0.161964467150383	0.539571227117258	7.31496883540506	0.00140040770274372	0.169683783144704	36.4278489596001	0	22.8933539247355	7.40894372834482	0.0392156862745098	44.2541806020067	136.616799627709	36.4278489596001	53.2682926829268	87.2176670317773
fb_rec20p_per5	5	20	4	FilterBank	7	110	1	2	300	483	101	0	0	0.0805860805860806	0.209109730848861	0	0.114285714285714	0.0655737704918033	0.0666666666666667	7.57567298624394	28.3599135478859	15.8109965485732	22.0745300530858	0.384911560028476	15.7168740913895	-0.00845659509856439	0.23703338126911	0.465509565386184	6.20944729037127	0.00485868521586202	0.140888024940742	33.7017399835607	0	15.8109965485732	15.291879421232	0.0293040293040293	-0.71840354767184	108.793210952916	33.7017399835607	20.1632653061225	76.0133178449403
fb_rec20p_per5	5	20	4	FilterBank	7	110	1	3	370	432	39	0	0	0.0341614906832298	0.0902777777777778	0	0.0909090909090909	0.0909090909090909	0.0135135135135135	4.62097914437481	17.0339113182938	25.0183273604217	18.1539203190208	0.0204221389717951	4.49159819678014	0.00338923603462264	0.155160460357116	0.645385110854538	12.5616037339691	0.0110959971054793	0.15142977101254	33.8178739030175	0	25.0183273604217	8.9735157823735	0.0124223602484472	-5.69668246445498	100.347154844594	33.8178739030175	18.3403656821378	76.0950840379542
fb_rec20p_per5	5	20	4	FilterBank	7	110	1	4	464	794	117	0	0	0.0550239234449761	0.14735516372796	0	0.233333333333333	0.115942028985507	0.0104166666666667	8.0017847884093	27.2857829227306	21.2185892111311	19.9982595077424	0.148297601477503	7.01003321340085	0.000719564074742282	0.177563441344854	-0.87763351694472	11.0111194015875	0.00426204388624392	0.154559827926277	37.8377032502649	0	21.2185892111311	12.6214409248678	0.0143540669856459	44.2849740932642	94.2038060597033	37.8377032502649	51.1947160682455	70.8686023692931
fb_rec20p_per5	5	20	4	FilterBank	7	110	1	4	389	584	144	0	0	0.0631578947368421	0.246575342465753	0	0.159090909090909	0.114754098360656	0.0283687943262411	7.73879465626625	25.580041975967	16.137781853445	20.9281341235927	0.326907880241745	12.1219943917458	0.0163228421217645	0.205685554457771	0.899418495815927	15.607058357961	0.00715687489275211	0.137505504958302	28.8577308654753	0	16.137781853445	13.1778939834866	0.00789473684210526	13.5153846153846	97.9296066332501	28.8577308654753	28.0154347265222	65.9713716835553
fb_rec20p_per5	5	20	4	FilterBank	7	110	1	3	367	393	33	0	0	0.0158102766798419	0.083969465648855	0	0.0303030303030303	0	0.0101522842639594	5.96562909269834	20.41279981598	22.6741690893697	17.2643188349225	-0.127443829523036	4.11614957976002	-0.00398797014500366	0.150126283899672	0.118782642156833	5.82271066213217	-0.0145872617627551	0.160701723005414	33.1392785563061	0	22.6741690893697	9.53500833798373	0.0237154150197628	49.957671957672	102.201228181371	33.1392785563061	42.8115384615385	61.7896561355636
fb_rec20p_per5	5	20	4	FilterBank	7	110	1	4	390	480	84	0	0	0.0533333333333333	0.175	0	0.15	0.0238095238095238	0.0352112676056338	8.02501224477714	27.007001988723	23.8464824042235	18.9460512128332	0.546201604340326	5.52679905296653	0.00170295248689013	0.131165598572629	0.127218665115546	4.91396966585696	0.000583383739223672	0.131546479333333	31.9686432662959	0	23.8464824042235	12.4399995895773	0.0213333333333333	26.3706896551724	141.487807451408	31.9686432662959	40.2048066875653	93.4397558388965
fb_rec20p_per5	5	20	4	FilterBank	7	110	1	4	268	488	110	0	0	0.0212765957446809	0.225409836065574	0	0.0232558139534884	0.06	0.00854700854700855	6.34323080544492	21.4302089847383	18.0046523352257	20.0337638905451	0.218252246488418	10.418239254809	0.00515349885103758	0.183669007517033	-0.358693249191616	9.49747570188493	0.00375043299433163	0.144641599069444	35.0407639667275	0	18.0046523352257	9.60408150085526	0.0340425531914894	39.5175438596491	153.127841868397	35.0407639667275	42.9028571428571	80.5765627403787
fb_rec20p_per5	5	20	4	FilterBank	7	110	1	1	241	365	83	0	0	0.0466321243523316	0.227397260273973	0	0.111111111111111	0.027027027027027	0.0111111111111111	7.73726181905438	26.0906396984084	17.7035946750132	20.2178135882185	0.0838976029712227	9.17429382809633	-0.0185320753236155	0.235470890035692	-0.143535020996723	1.71163133677206	0.00393810314201431	0.139473676278966	35.9854882103795	0	17.7035946750132	14.518802790516	0.0414507772020725	-6.16909620991254	137.727442856707	35.9854882103795	10.3021582733813	95.5787598953564
fb_rec20p_per5	5	20	4	FilterBank	7	110	1	3	515	820	106	0	0	0.032719836400818	0.129268292682927	0	0.108695652173913	0	0.027363184079602	7.30857990131579	25.2334694871736	23.3725788665504	19.9839540796386	-0.107150450854569	7.82994004664261	0.000546971560124975	0.165149871956351	0.56456863892868	7.13222880865056	-0.00325497720653273	0.145992358866031	36.2815901047822	0	23.3725788665504	9.41826537631853	0.0184049079754601	67.219387755102	113.346327096608	36.2815901047822	68.6555819477435	69.0440001079783
fb_rec20p_per5	5	20	4	FilterBank	7	110	1	2	284	403	43	0	0	0.022140221402214	0.106699751861042	0	0.0384615384615385	0.0425531914893617	0.00657894736842105	4.98900217891732	18.254674761132	23.2225266318472	17.7853195419508	-0.0905202107254897	4.60775520571332	-0.00290035874149154	0.168773135231778	0.321558633286751	7.14810764919319	0.0030678831361178	0.145943645396082	35.5407626367066	0	23.2225266318472	9.54006547251769	0.0516605166051661	41.9615384615385	122.239025028986	35.5407626367066	58.2713567839196	59.4118201828792
fb_rec20p_per5	5	20	4	FilterBank	7	110	1	4	313	584	149	0	0	0.0848056537102474	0.25513698630137	0	0.0540540540540541	0.161764705882353	0.05	8.91036674366122	28.1522874687687	14.1289030950143	23.1742039218289	-0.90328341878735	18.3892025572896	0.0207471633404333	0.426579537708827	2.35413601437838	17.8569373282916	0.00376558960455787	0.186931786754144	34.1723014798234	0	14.1289030950143	14.3771176869336	0.03886925795053	35.7769516728625	108.63806647031	34.1723014798234	48.1407249466951	58.5743422230209
fb_rec20p_per5	5	20	4	FilterBank	7	110	1	3	434	628	186	0	0	0.105398457583548	0.296178343949045	0	0.28125	0.158730158730159	0.0627306273062731	9.74566123579391	31.1269789122326	15.4894323597514	22.2016016922936	0.507582986775325	13.8076842454518	0.010085787594944	0.394014244362759	1.41114218127672	14.6601570484271	0.00321882415075942	0.153967993912341	29.7894728239818	0	15.4894323597514	13.8616707929229	0.0359897172236504	24.0647482014388	110.373107354753	29.7894728239818	45.6066252587992	62.7771930043665
fb_rec20p_per5	5	20	4	FilterBank	7	110	1	1	270	428	137	0	0	0.157676348547718	0.320093457943925	0	0.240740740740741	0.106382978723404	0.171171171171171	9.02653624342911	28.6836055159201	12.3581421441166	21.6386365196405	-0.13263112940453	17.3860691406151	0.0507775523177542	0.377267993360518	-0.0307419879827509	43.071083310333	0.0198284877824918	0.230485916489994	24.7414206958887	0	12.3581421441166	16.2866747187564	0.029045643153527	-32.8087431693989	110.789750428728	24.7414206958887	-13.6375316990702	85.4556588110547
fb_rec20p_per5	5	20	4	FilterBank	7	110	1	2	449	418	40	0	0	0.0708661417322835	0.0956937799043062	0	0	0	0.0814332247557003	5.13097678858156	19.781914445816	22.0004454333297	15.8299013448939	-0.00948659093333829	3.16231799807531	0.00123046622862579	0.146033024227409	1.02051881871088	13.9582510676568	0.00303761430113574	0.17649595240821	24.218258898994	0	22.0004454333297	11.2626478914243	0.0078740157480315	4.99255583126551	100.178385391612	24.218258898994	17.5089820359281	57.033141228237
fb_rec20p_per5	5	20	4	FilterBank	7	110	1	4	297	370	77	0	0	0.0574712643678161	0.208108108108108	0	0.0638297872340425	0.0338983050847458	0.0571428571428571	6.21990119127899	23.8098214897541	21.5836677436339	23.009250458094	0.811233865237458	12.9752845790325	-0.0056082477253454	0.376346854781113	1.41648036361457	14.4026647959291	0.00207478886141062	0.123969575731396	36.5513882294564	0	21.5836677436339	12.8403130566789	0.0268199233716475	42.3157894736842	101.447103823332	36.5513882294564	45.2482441397612	78.8020877532383
fb_rec20p_per5	5	20	4	FilterBank	7	110	1	1	241	329	74	0	0	0.151376146788991	0.224924012158055	0	0.156862745098039	0.25	0.0769230769230769	5.99094967080922	22.0147913655203	16.2868493269191	20.6844363343966	-0.0969497276009047	15.2167941341729	-0.0222578342575684	0.162435709349208	-1.00885332308094	25.6737658793863	-0.0111252437346012	0.236347828425078	27.5462080845577	0	16.2868493269191	15.8928054283047	0.0137614678899083	-26.1368078175896	127.293062285878	27.5462080845577	-11.7398809523809	96.5852542077787
fb_rec20p_per5	5	20	4	FilterBank	7	110	1	0	203	199	48	0	0	0.123188405797101	0.241206030150754	0	0.145833333333333	0.0689655172413793	0.0869565217391304	5.59904329962378	20.8042632038304	13.513014959161	16.2851197523366	0.881448720325533	10.7303830056266	-0.0293013840615395	0.314892623542534	0.00559455809678991	11.4366178336473	-0.0101304716471819	0.139301449655127	24.0992234596951	0	13.513014959161	11.8253537394592	0.0942028985507246	41.3404255319149	140.18715932802	24.0992234596951	60.0140350877193	94.1846925147264
fb_rec20p_per5	5	20	4	FilterBank	7	110	1	1	297	334	49	0	0	0.0407239819004525	0.146706586826347	0	0.0227272727272727	0.0645161290322581	0.0285714285714286	6.23165081927007	23.1934507340732	19.0196992736113	19.2661484422489	-0.339926076950287	7.35204226418623	-0.00693677180401138	0.20295995907676	-0.666873688949021	10.6161772336936	-0.0127102978500251	0.115926043274493	32.2575411199546	0	19.0196992736113	13.7740492179697	0.0542986425339367	5.63467492260062	94.3918239768006	32.2575411199546	31.5517730496454	61.5868905378373
fb_rec20p_per5	5	20	4	FilterBank	7	110	1	6	397	613	101	0	0	0.0659630606860158	0.164763458401305	0	0.0416666666666667	0.0384615384615385	0.0681818181818182	7.32518955882696	23.4849859929046	19.0292423443276	19.5192948619942	0.15930482761804	9.06350502262111	0.0032183517722247	0.162029956310198	-0.407773035070449	15.7546576758833	0.0068616979409723	0.158580702413441	30.1023122285952	0	19.0292423443276	9.45366471752968	0.0211081794195251	36.2145328719723	117.830808689711	30.1023122285952	37.3636923076923	79.6974729599461
fb_rec20p_per5	5	20	4	FilterBank	7	110	1	3	303	338	41	0	0	0.0393700787401575	0.121301775147929	0	0.0377358490566038	0.0555555555555556	0.0181818181818182	5.81927935602747	18.8295498334144	27.4268424642159	20.2183739660975	-1.07317417714181	7.4565999306931	0.00915241517414231	0.14323397913483	-1.37137877756824	18.3124144762962	0.0111348319288964	0.13616065020719	39.5990808106822	0	27.4268424642159	10.1618826071119	0.0669291338582677	54.9390243902439	108.556933870666	39.5990808106822	53.0348258706468	51.7138644958442
fb_rec20p_per5	5	20	4	FilterBank	7	110	1	5	422	678	121	0	0	0.065	0.178466076696165	0	0.153846153846154	0.09375	0.0443686006825939	7.57713802732506	24.5503757810197	20.0823732342761	20.129677086733	0.0467612982569774	8.91702473936153	0.00684571106370013	0.315897998166929	-0.242961348470046	16.464909476558	0.0161346902717818	0.383757566112075	33.4429135835866	0	20.0823732342761	9.3394394673615	0.015	23.9480519480519	88.0245192897918	33.4429135835866	35.6034095140947	71.6412716311496
fb_rec20p_per5	5	20	4	FilterBank	7	110	1	6	496	878	173	0	0	0.0777096114519427	0.197038724373576	0	0.137254901960784	0.166666666666667	0.0579345088161209	8.81226526990732	28.6574141157015	20.3670582159719	20.8493711322266	-0.0584731896619249	9.47119060277896	0.00719969016903912	0.283655265856799	0.0166071165086068	5.68409255266585	0.00202365415603952	0.150030603564293	35.330094992716	0	20.3670582159719	11.6216821927977	0.0143149284253579	46.2265529841657	98.2487253138002	35.330094992716	55.3520190023753	66.4181363424152
fb_rec20p_per5	5	20	4	FilterBank	7	110	1	3	337	621	154	0	0	0.0666666666666667	0.247987117552335	0	0.0909090909090909	0.0909090909090909	0.0533333333333333	8.82906164073542	26.1451768108586	17.3023284146314	20.4890472286581	0.602833449471347	10.2147237859122	0.00539325929934982	0.299257247068329	-0.0229031872427707	4.92397124013307	-0.00947809927964837	0.130744679701971	32.821743550146	0	17.3023284146314	11.5905188321131	0.0272727272727273	47.7630662020906	142.939080599599	32.821743550146	49.087962962963	79.8844303094929
fb_rec20p_per5	5	20	4	FilterBank	7	110	1	1	257	235	72	0	0	0.119047619047619	0.306382978723404	0	0.15625	0.125	0.0833333333333333	6.58261983101254	22.899799611889	13.5303522474266	18.8941433174171	0.266255056712924	13.0119144034926	-0.00248825046976581	0.136962999503965	1.06512129739285	24.615215319621	-0.0118430255242485	0.137849109138435	23.7562772717079	0	13.5303522474266	12.9207987635965	0.0238095238095238	46.6919431279621	144.595181641109	23.7562772717079	27.7393858477971	68.770718118595
fb_rec20p_per5	5	20	4	FilterBank	7	110	1	2	317	518	164	0	0	0.0631578947368421	0.316602316602317	0	0.186440677966102	0.0555555555555556	0.0246913580246914	7.98488935037836	28.0181400270955	16.2822133340139	23.2145336913557	-0.124309025547222	15.0093009141916	-0.0120824276950297	0.441815437213015	0.0663058433017205	4.20227172941929	0.00211370907911331	0.13592971077311	39.5075604549551	0	16.2822133340139	13.5658838141709	0.0596491228070175	25.4957264957265	122.280901310798	39.5075604549551	40.7031578947369	54.9957486623041
fb_rec20p_per5	5	20	4	FilterBank	7	110	1	3	338	463	104	0	0	0.0711974110032362	0.224622030237581	0	0.218181818181818	0.0689655172413793	0.021505376344086	8.06406064918628	26.158777110873	21.0278691294335	21.4390762725516	0.0632481148602722	8.3550455525384	0.0118840378624465	0.3589188387027	-0.134383227956861	6.1639424819915	-0.0138840642443532	0.169979835994179	36.8820787284736	0	21.0278691294335	11.6362183249759	0.0453074433656958	25.8648018648019	104.642651354482	36.8820787284736	47.1791193464834	51.0331613491485
fb_rec20p_per5	5	20	4	FilterBank	7	110	1	4	398	645	144	0	0	0.051948051948052	0.223255813953488	0	0.133333333333333	0.0793650793650794	0.0289256198347107	8.58885181098696	26.9557770115117	21.2779467389735	20.3613297307228	-0.432420981568439	9.84884779049403	-0.0097333043296357	0.187132103183632	0.962336852282331	12.0505490809848	-0.000263071244777984	0.139153214421817	37.1260037643684	0	21.2779467389735	13.1344740826304	0.0181818181818182	16.2003338898164	109.653207978405	37.1260037643684	38.0671140939597	72.6867125005328
fb_rec20p_per5	5	20	4	FilterBank	7	110	1	0	412	577	70	0	0	0.0319767441860465	0.121317157712305	0	0.2	0.032258064516129	0.00793650793650794	5.20288940522381	19.6670797532555	24.3155262190983	17.3116222588728	0.119955999114185	5.3950826012714	0.00523574939081064	0.152794870077786	-0.0657498888331332	2.91921865714416	0.0084811817389329	0.127923266952215	36.7420883065315	0	24.3155262190983	9.23542470929051	0.0232558139534884	29.2819614711033	107.33026260348	36.7420883065315	55.1673003802281	60.303134967919
fb_rec20p_per5	5	20	4	FilterBank	7	110	1	2	270	337	70	0	0	0.0582959641255605	0.207715133531157	0	0.0535714285714286	0.0625	0.0396825396825397	6.03982116101416	20.4897597348753	18.4838439785024	18.6460822361108	0.0304412632909888	8.36143153885838	0.0108686865364597	0.167191595416002	0.177789607914051	7.99056843096734	0.0171395274079871	0.13949747443694	30.5455924768021	0	18.4838439785024	11.3069367087484	0.0538116591928251	60.0764331210191	111.801715247507	30.5455924768021	60.3006369426752	75.5158893933837
fb_rec20p_per5	5	20	4	FilterBank	7	110	1	4	443	766	81	0	0	0.0233160621761658	0.105744125326371	0	0.146341463414634	0.0285714285714286	0.00651465798045603	4.7796138864174	17.6438878149311	21.3376348801383	18.0894660033954	0.0640558891685383	6.70967715249071	0.0061293109334906	0.151005558797351	-0.230610389864373	8.09945683739482	0.00321703667058064	0.127583697888884	37.1857480072913	0	21.3376348801383	8.11661253117294	0.0233160621761658	40.3289124668435	91.9114883254509	37.1857480072913	61.0007512583578	47.7597627849996
fb_rec20p_per5	5	20	4	FilterBank	7	110	1	4	351	442	26	0	0	0.0036231884057971	0.0588235294117647	0	0	0	0.00555555555555556	5.18710611535107	18.928213632913	25.9636059126127	18.1045440729261	-0.0180067637971659	3.64605808426677	0.0131589151644873	0.124310048999419	-0.0431407194126643	1.41823799278974	0.0170282910409721	0.129825639320422	39.6204690569092	0	25.9636059126127	9.95340949407416	0.0181159420289855	-8.82758620689655	106.213484578806	39.6204690569092	11.1578947368421	77.9046722284338
fb_rec20p_per5	5	20	4	FilterBank	7	110	1	4	399	552	98	0	0	0.0449438202247191	0.177536231884058	0	0.0333333333333333	0.087719298245614	0.0197628458498024	6.23989727531902	22.0327670846298	22.9229852922229	21.5981815545636	0.107123352931269	9.30813977156896	-0.0121228955855583	0.144529094732244	-0.224355333356578	2.68728434672747	-0.0164276028812287	0.154129835569495	38.5022288494596	0	22.9229852922229	10.1218009498322	0.0280898876404494	37.1338582677165	94.8739316908125	38.5022288494596	50.4514859602378	55.5940975727805
fb_rec20p_per5	5	20	4	FilterBank	7	110	1	7	439	758	130	0	0	0.0325	0.171503957783641	0	0.0625	0.0285714285714286	0.0303030303030303	6.94036898771265	23.2172917568318	20.3623609104887	22.0090880180635	0.199373840999447	9.92030086441452	0.0141941199957987	0.286921676906901	0.00717837464664866	6.93375664670799	-0.00526278138427289	0.154117395377093	38.4435433614556	0	20.3623609104887	10.1955214940845	0.02	10.7159090909091	84.711267468718	38.4435433614556	33.44	61.0803746522948
fb_rec20p_per5	5	20	4	FilterBank	7	110	1	4	399	730	133	0	0	0.0513595166163142	0.182191780821918	0	0.0789473684210526	0.18	0.0182648401826484	7.23815463468393	26.2484620898497	18.5924242746006	18.5946133378209	0.126932414191399	8.32159602911446	0.00036988475089135	0.158184708955104	0.579699067857579	7.74911840181654	0.00034443920621596	0.122822420897115	33.4611768014955	0	18.5924242746006	12.8247138024551	0.0241691842900302	11.6220930232558	98.2974553563239	33.4611768014955	22.6589676290464	73.2325137266825
fb_rec20p_per5	5	20	4	FilterBank	7	110	1	2	248	162	49	0	0	0.141791044776119	0.302469135802469	0	0.0285714285714286	0	0.177777777777778	5.07305925827523	18.4183243221843	16.7925051434626	21.5204437249899	-1.82032238500494	11.630768029597	0.0358766100284611	0.342593007244786	-2.85493903772049	16.1094246355698	0.0398140583189364	0.281683206431001	24.9826354802405	0	16.7925051434626	11.6913018844082	0.0149253731343284	2.5985401459854	75.4384692641094	24.9826354802405	11.1272727272727	63.817128224945
fb_rec20p_per5	5	20	4	FilterBank	7	110	1	3	285	304	92	0	0	0.0962566844919786	0.302631578947368	0	0	0.03125	0.107843137254902	6.85553115257066	24.7545447846122	13.2423707580162	22.2748039068836	0.0257014187195855	15.2221059480026	0.0467658508637163	0.412303009330744	-0.479347495775024	14.4663973785372	0.00469822909281614	0.135094487661273	29.2979964933191	0	13.2423707580162	15.3211690303609	0.0320855614973262	12.2105263157895	104.877718340453	29.2979964933191	35.9015873015873	65.246985504775
fb_rec20p_per5	5	20	4	FilterBank	7	110	1	3	350	567	52	0	0	0.0390625	0.091710758377425	0	0.135135135135135	0.0909090909090909	0	5.17858896645122	18.8223459179008	21.702539076038	17.7499503558378	0.101921209695659	4.75454562556541	-0.0180047762447549	0.231423609076589	-0.0908330547378374	5.85159206712199	-0.0109249336676353	0.142916360641643	37.7831911888341	0	21.702539076038	10.4571687979886	0.0234375	24.0711743772242	113.519338447114	37.7831911888341	38.8002336448598	79.4103038663333
fb_rec20p_per5	5	20	4	FilterBank	7	110	1	3	473	692	116	0	0	0.0617283950617284	0.167630057803468	0	0.172413793103448	0.0697674418604651	0.0483271375464684	8.10384817887954	28.5954546729497	21.3266344999964	21.2051893102362	0.628610707900243	9.77894707974073	-9.77281627692896e-05	0.33794434655728	-0.158526977447581	8.20273338749618	0.00454922972376127	0.152289745011327	35.8786648478277	0	21.3266344999964	15.4304226984395	0.037037037037037	31.8511627906977	84.1718306070697	35.8786648478277	41.7214285714286	54.3288605778223
fb_rec20p_per6	5	20	4	JAR_FilterBank	7	110	1	4	332	380	59	0	0	0.0613718411552347	0.155263157894737	0	0.142857142857143	0.0545454545454545	0.0314465408805031	7.29511703882337	23.8479556065255	23.0344436789228	20.114495244416	-0.341114923495782	8.50559836100755	-0.00132949628597736	0.166721111681131	-0.0251439591102526	8.30619785841207	0.00203869542415704	0.141266108272423	33.3671022966114	0	23.0344436789228	11.7721302734129	0.0216606498194946	10.3076923076923	111.579068537547	33.3671022966114	32.7929515418502	73.5968830116973
fb_rec20p_per6	5	20	4	JAR_FilterBank	7	110	1	1	287	514	64	0	0	0.0464285714285714	0.124513618677043	0	0.0434782608695652	0.0483870967741935	0.015625	6.09631971925283	20.7771754759796	20.6729718924249	17.4623649629136	0.141094126088697	6.09131447602289	-0.00201951952983443	0.145015234707847	0.276100975250583	9.20397275055928	-0.00771404242394422	0.140119563495955	33.0590539033751	0	20.6729718924249	9.29617552588986	0.0107142857142857	30.315369261477	135.117150441065	33.0590539033751	42.1590339485076	57.8449067617352
fb_rec20p_per6	5	20	4	JAR_FilterBank	7	110	1	3	336	505	115	0	0	0.0833333333333333	0.227722772277228	0	0.0909090909090909	0.0606060606060606	0.0473372781065089	7.31378069562294	23.1950214363292	19.8941110489242	21.4359286585775	0.796961895738662	9.13804707442167	0.00104057679724897	0.187328004280881	-0.604680484301535	10.876003772713	-0.00318790567248231	0.218126087745422	37.2638872433689	0	19.8941110489242	11.8036893107229	0.0288461538461538	19.2750533049041	109.904324340816	37.2638872433689	35.3999740865509	60.219685275552
fb_rec20p_per6	5	20	4	JAR_FilterBank	7	110	1	3	324	517	91	0	0	0.045016077170418	0.176015473887814	0	0.171428571428571	0.0595238095238095	0.0121212121212121	6.99441363957883	22.7237863661044	20.4346113951478	19.6205048042626	0.115829503510657	8.29801217108161	0.00927518770943474	0.149349845076264	-1.59114092374246	19.8686262414373	0.0203229278193433	0.138505596508421	34.4128679803746	0	20.4346113951478	10.5670285609544	0.0257234726688103	10.7566462167689	104.152277004022	34.4128679803746	31.4228603988604	62.3590769590367
fb_rec20p_per6	5	20	4	JAR_FilterBank	7	110	1	4	586	742	124	0	0	0.0785854616895874	0.16711590296496	0	0	0.0444444444444444	0.0868544600938967	6.33905846875315	22.2343349189938	17.9005605062316	17.6290848700116	-0.563703156180541	7.5073099272809	0.00602054189583062	0.201955137842749	-0.213892778861445	12.4925667743351	-0.00644753699804128	0.142498731184926	25.0726339572149	0	17.9005605062316	9.36588703848435	0.0137524557956778	16.4839650145773	66.7421590967659	25.0726339572149	27.9837837837838	58.0541765197328
fb_rec20p_per6	5	20	4	JAR_FilterBank	7	110	1	3	258	281	84	0	0	0.0481927710843374	0.298932384341637	0	0.0465116279069767	0.0588235294117647	0.0465116279069767	6.69836310502559	22.274673443893	16.6776289619826	21.8178570253097	0.75823456894942	16.5126041449693	0.0162513623887014	0.161492625278215	-0.373835470388312	5.87605233395392	0.00884250555440693	0.141735873329557	34.2474667904021	0	16.6776289619826	12.6605909617021	0.0421686746987952	20.1152263374486	125.722716897385	34.2474667904021	38.5487804878049	62.3537769713989
fb_rec20p_per6	5	20	4	JAR_FilterBank	7	110	1	2	321	581	127	0	0	0.0961538461538462	0.218588640275387	0	0.166666666666667	0.0483870967741935	0.0967741935483871	8.58767788020407	27.164342283329	16.2677125854395	18.7550012570579	-0.802112366713549	11.5872256121729	-0.00507168267449066	0.249922548080619	1.11604727535426	18.7115482886162	0.00515834797134133	0.160055189241436	27.7598859259431	0	16.2677125854395	13.731566716904	0.0288461538461538	20.5111111111111	132.6938735182	27.7598859259431	33.840402075227	89.6558035040923
fb_rec20p_per6	5	20	4	JAR_FilterBank	7	110	1	6	317	501	93	0	0	0.0351437699680511	0.18562874251497	0	0.111111111111111	0.0535714285714286	0.00512820512820513	8.50131785574843	27.0652700750645	25.8754876809661	20.4112989431993	-0.305969731016738	5.32052701364233	-0.00197005213375612	0.132332214655233	0.270429069742653	3.03407478975555	-0.00411736771508492	0.132702254710331	40.3556709910567	0	25.8754876809661	12.2089897344774	0.0351437699680511	47.7863247863248	131.806576152652	40.3556709910567	48.6166666666667	63.6114227963918
fb_rec20p_per6	5	20	4	JAR_FilterBank	7	110	1	5	424	604	155	0	0	0.101449275362319	0.256622516556291	0	0.0816326530612245	0.150943396226415	0.0859872611464968	9.69453448436258	29.2761179433586	18.6088068692902	21.1857296720454	0.642028899769489	11.8875937903775	0.0195658780608144	0.60317794793609	0.108524669229612	21.1698891116164	-0.00695794439636107	0.24198993579495	28.9520833627374	0	18.6088068692902	12.3208083013147	0.00966183574879227	15.0423572744015	117.231140355162	28.9520833627374	31.4791059280855	64.0815874593479
fb_rec20p_per6	5	20	4	JAR_FilterBank	7	110	1	2	314	522	116	0	0	0.0819672131147541	0.222222222222222	0	0.0545454545454545	0.132075471698113	0.0670103092783505	8.86136677401683	27.8039835554113	18.2383818196916	19.8960440807642	0.551688348913659	9.62676472770428	-0.00409493875281993	0.205699680107305	0.604976326393173	7.27798269788566	-0.013427075405484	0.156864704312677	31.8155929987123	0	18.2383818196916	11.9547245152566	0.0426229508196721	28.998003992016	139.313035987333	31.8155929987123	39.8397358943577	86.7614542359323
fb_rec20p_per6	5	20	4	JAR_FilterBank	7	110	1	3	246	197	22	0	0	0.0239520958083832	0.111675126903553	0	0.0222222222222222	0.0256410256410256	0.0202020202020202	5.44214044686325	19.0023468258777	26.8047458665176	20.8076470771274	-0.465206727224715	5.9947477982297	-0.00986859749922976	0.142032741489177	-1.13743937337243	14.8347706531898	-0.026533310290618	0.133916588183009	35.4926525174225	0	26.8047458665176	12.2510702042256	0.0479041916167665	42.3251231527094	138.38199644448	35.4926525174225	62.8396946564886	87.4676042705477
fb_rec20p_per6	5	20	4	JAR_FilterBank	7	110	1	2	365	553	117	0	0	0.0404624277456647	0.211573236889693	0	0.0576923076923077	0.0175438596491228	0.0427350427350427	7.05317462198924	23.4263352932122	23.0276003025394	20.6430653267515	-0.2857252265774	8.1513777779347	-0.00523599997866714	0.194567910405244	0.201922471289016	6.34578148906122	0.00872309859997451	0.144888185339154	37.2282897086759	0	23.0276003025394	11.5634804139338	0.0289017341040462	2.40954274353877	119.09599424418	37.2282897086759	35.5973154362416	63.7127306481281
fb_rec20p_per6	5	20	4	JAR_FilterBank	7	110	1	3	302	535	115	0	0	0.0334448160535117	0.214953271028037	0	0.0833333333333333	0.0204081632653061	0.0211640211640212	7.75833413350385	23.9260941545999	21.2153179732618	20.8188422405782	-0.127365738418763	8.6941953036877	0.00236082143050134	0.170281103065913	-0.610565914055918	8.86393184914474	-0.0120539905754467	0.162875060040456	37.2400041053656	0	21.2153179732618	11.2123347639327	0.0367892976588629	39.7940594059406	132.351223618109	37.2400041053656	55.4571428571429	84.6314338187094
fb_rec20p_per6	5	20	4	JAR_FilterBank	7	110	1	3	319	282	46	0	0	0.0526315789473684	0.163120567375887	0	0.0731707317073171	0.0357142857142857	0.0065359477124183	6.20636697064272	20.9611784927045	28.7643050596901	18.9711484610606	-0.305106748057617	5.0191901737758	0.0145134206165996	0.131588665876447	-0.201469061018901	2.37329489647541	0.011980467579697	0.123893444239017	39.6200740544306	0	28.7643050596901	11.9972363145242	0.0087719298245614	36.0912547528517	88.0519843395338	39.6200740544306	52.15770609319	54.986049913045
fb_rec20p_per6	5	20	4	JAR_FilterBank	7	110	1	3	312	502	140	0	0	0.105660377358491	0.278884462151394	0	0.0384615384615385	0.146666666666667	0.0603448275862069	6.70873885049935	22.6219926724844	12.260980900223	20.2326567666596	-0.873747257276843	14.5881654413047	0.00470545053670022	0.317607741809444	-1.82751753102346	18.3906446186244	0.000641267694444332	0.123552116323613	26.4665801245732	0	12.260980900223	11.2737011189283	0.0490566037735849	-18.8724832214765	86.1165095074056	26.4665801245732	4.99602763385147	83.7702561966865
fb_rec20p_per6	5	20	4	JAR_FilterBank	7	110	1	3	371	473	92	0	0	0.0477815699658703	0.194503171247357	0	0	0.0408163265306122	0.0448717948717949	6.20232862927429	22.1962751621949	17.8780889175839	22.4815887753837	-0.548694840200754	11.8689327261798	-0.0129053939479362	0.511976518495789	-0.404474942829379	9.26251999943791	-0.0192844818027855	0.206773929943158	32.2202278217494	0	17.8780889175839	11.1469255230904	0.0273037542662116	12.2080378250591	88.015262741894	32.2202278217494	19.8551859099804	60.3644698096498
fb_rec20p_per6	5	20	4	JAR_FilterBank	7	110	1	2	417	449	63	0	0	0.0501474926253687	0.140311804008909	0	0	0.0555555555555556	0.0528301886792453	5.7037939396073	20.4129652624458	21.3991949022931	17.656597235783	0.176402065128069	8.10403933070327	-0.000735987550962899	0.187288432586403	-0.0940516855823606	16.5175364089251	-0.00905660618344185	0.176602955487183	29.3436887572084	0	21.3991949022931	8.26645794585923	0.0383480825958702	54.9277389277389	99.9675035973343	29.3436887572084	49.1469534050179	52.3381704152092
fb_rec20p_per6	5	20	4	JAR_FilterBank	7	110	1	2	382	709	123	0	0	0.0368421052631579	0.173483779971791	0	0.0784313725490196	0.06	0.0231660231660232	6.192540459938	22.2140831583806	18.4710329854135	21.214099639793	-0.0542863401198345	10.5807636318818	0.000540695224721552	0.270225774327712	-1.00703540226208	14.6469209897497	-0.00129371222988525	0.175475113531045	31.802570432483	0	18.4710329854135	11.5684182872188	0.0184210526315789	24.1739130434783	100.114017778162	31.802570432483	45.0368077055384	59.2942159462744
fb_rec20p_per6	5	20	4	JAR_FilterBank	7	110	1	5	434	712	128	0	0	0.0821596244131455	0.179775280898876	0	0.2	0.0759493670886076	0.06875	7.09463468224702	22.3755036036518	18.5762404200229	19.1540608608932	-0.396161228626921	6.48005450022234	0.0141685523875142	0.259143704706268	-2.22426129050938	17.3897557981422	0.00194026209630754	0.147847249052951	28.8428462998017	0	18.5762404200229	11.3800780421966	0.0140845070422535	11.9697428139183	106.246250521053	28.8428462998017	25.1889112764582	76.146149545358
fb_rec20p_per6	5	20	4	JAR_FilterBank	7	110	1	2	411	448	58	0	0	0.0676470588235294	0.129464285714286	0	0.0476190476190476	0.152542372881356	0.0491803278688525	5.50898629333299	19.9444594649866	21.1252992233758	17.1787170524128	0.118812038545032	5.76738333732114	-0.0216772842222254	0.325010635424433	-1.62320450635719	13.4151552503353	-0.010252316023597	0.156349258506914	26.2843105436436	0	21.1252992233758	8.72917563649952	0.0264705882352941	22.5641025641026	98.1558398429721	26.2843105436436	30.3111586400177	77.6485302911543
fb_rec20p_per6	5	20	4	JAR_FilterBank	7	110	1	2	323	460	66	0	0	0.0575079872204473	0.143478260869565	0	0.145454545454545	0.0227272727272727	0.0204081632653061	5.62079900559074	19.6040617118102	24.3611865533634	18.88173838267	-0.951779241161106	6.11177897432128	0.00244729494038372	0.151462369894382	-0.525576250021722	6.34706259640514	-0.00943314782677508	0.157330403195517	36.0664773463091	0	24.3611865533634	10.6153503434602	0.012779552715655	32.3741648106904	136.10684763784	36.0664773463091	65.534693877551	74.3963398949335
fb_rec20p_per6	5	20	4	JAR_FilterBank	7	110	1	3	229	192	36	0	0	0.0420168067226891	0.1875	0	0.108108108108108	0	0.02	5.0654296346681	19.9983982165922	19.2490690715941	22.1446157835723	0.104481439380763	11.7127252355804	-0.00660856175216322	0.131113235897402	-0.0093262740625666	1.27145605443288	-0.0141067744689968	0.12699573946228	36.6738347481744	0	19.2490690715941	12.7045036974742	0.0252100840336134	-3.13142857142857	135.819944558601	36.6738347481744	15.2272727272727	59.967371831943
fb_rec20p_per6	5	20	4	JAR_FilterBank	7	110	1	0	218	67	15	0	0	0.0625	0.223880597014925	0	0.0454545454545455	0.0833333333333333	0.0285714285714286	4.95086095152467	18.7559014607623	29.3779005462234	21.8555168379306	0.565112850044604	9.89983150322315	0.0115076452180998	0.0884010966412972	0.424504750807064	1.98751861843001	0.00972044149749195	0.0730070314978455	41.5081409559665	0	29.3779005462234	16.3994263279629	0.046875	4.13333333333333	118.320373285683	41.5081409559665	38.6666666666667	57.1837716475347
fb_rec20p_per6	5	20	4	JAR_FilterBank	7	110	1	3	422	463	62	0	0	0.046448087431694	0.133909287257019	0	0.134615384615385	0.03125	0.0114942528735632	6.47942832487828	23.9728146854909	26.4281428955014	21.1020082485003	0.297952690752936	10.4479089445936	-0.000771202216847612	0.379731712834741	-0.785516713413894	16.7512830951484	0.00437103900053043	0.179366864508765	36.4931562177437	0	26.4281428955014	11.8186066443135	0.0136612021857923	12.9379310344828	136.279745192111	36.4931562177437	42.7541666666667	73.5081166600512
fb_rec20p_per6	5	20	4	JAR_FilterBank	7	110	1	0	213	149	30	0	0	0.0442477876106195	0.201342281879195	0	0.0625	0	0	6.13699961910978	22.6897668174034	17.8473226545028	15.896960647203	0.155042718298914	5.0456227824059	-0.0280366631064471	0.284681830586877	0.107527235601596	1.9032547916119	-0.026696555004174	0.118060496988521	31.5248242969329	0	17.8473226545028	16.2943016704196	0.0707964601769911	-19.0068965517241	180.848328738927	31.5248242969329	-17.8039215686275	137.577471936047
fb_rec20p_per6	5	20	4	JAR_FilterBank	7	110	1	3	357	786	181	0	0	0.0591549295774648	0.23027989821883	0	0.16	0.130434782608696	0.00851063829787234	7.02042124459151	22.4639568439818	17.375336180776	19.272403888803	-0.118437208359752	10.6621793696857	0.00129738464219711	0.18154395561417	-0.429920095194078	7.81058767765722	-0.00233003021142247	0.163471954515284	34.4656459575298	0	17.375336180776	10.1400689298122	0.00845070422535211	13.7938718662953	121.726454958939	34.4656459575298	40.8170703575548	76.397744239441
fb_rec20p_per6	5	20	4	JAR_FilterBank	7	110	1	1	240	147	20	0	0	0.00892857142857143	0.136054421768707	0	0.024390243902439	0	0	3.96159714972754	14.442779533274	25.4282587610213	20.3731600411349	-0.378732980493263	5.36393225775614	0.000491266520585554	0.126410191426582	-0.0820961057905262	0.926700299913055	0.00230429886210929	0.125976958118027	41.1542894387348	0	25.4282587610213	6.71172211337822	0.0803571428571429	20.2941176470588	96.9870642498694	41.1542894387348	55.8536585365854	46.7383370151709
fb_rec20p_per6	5	20	4	JAR_FilterBank	7	110	1	1	351	302	21	0	0	0.00806451612903226	0.0695364238410596	0	0	0	0.00543478260869565	4.20529602445991	16.9495983674302	25.7479359348402	16.6727209199626	0.763779029587993	5.43816511237674	0.00395970457050086	0.138504401393433	-0.0311077313068017	0.876495227093493	-0.00274790912130865	0.139769834557863	33.610676925705	0	25.7479359348402	7.71400111225841	0.0201612903225806	12.9632107023411	114.041947353155	33.610676925705	35.3571428571429	66.2508965527432
fb_rec20p_per6	5	20	4	JAR_FilterBank	7	110	1	2	338	509	114	0	0	0.0859872611464968	0.223968565815324	0	0.155555555555556	0.0540540540540541	0.07981220657277	7.6129177897602	26.0233771794342	16.9402339888306	19.8365985282954	-0.398945961316631	12.9526213811209	-0.0181141673359392	0.248331976379156	-0.838200445313966	11.8226237262344	-0.00368163376160341	0.173591244574256	27.351264417143	0	16.9402339888306	13.5840339208113	0.0191082802547771	45.3276231263383	122.906930084488	27.351264417143	39.2162162162162	71.144180821043
fb_rec20p_per6	5	20	4	JAR_FilterBank	7	110	1	3	268	348	77	0	0	0.0788381742738589	0.221264367816092	0	0.122448979591837	0.112903225806452	0.0378787878787879	6.50353937592348	23.2362989257661	18.6123202290621	21.0485183810996	3.17931649220295e-05	11.2223424717808	0.0345087082884148	0.224666345346903	1.79861958639172	15.2990562545517	0.0257571628399378	0.196081392657033	33.185383628019	0	18.6123202290621	12.177898573645	0.0663900414937759	-11.7373134328358	145.655578525627	33.185383628019	26.3303423064141	77.3733902073807
fb_rec20p_per6	5	20	4	JAR_FilterBank	7	110	1	3	358	398	66	0	0	0.0541516245487365	0.165829145728643	0	0.0294117647058824	0.0256410256410256	0.050251256281407	6.3308589427908	22.0841257847451	22.6208762062036	20.4872761344941	-0.695246916362951	8.53103167636499	0.0143470104254273	0.30762920379982	-0.885277316225932	11.4930524202005	0.0145565702020622	0.173825266549702	33.3159307500186	0	22.6208762062036	11.6745669409276	0.0144404332129964	9.34794520547945	105.794233351004	33.3159307500186	21.049173553719	70.7717629192608
fb_rec20p_per6	5	20	4	JAR_FilterBank	7	110	1	2	463	810	154	0	0	0.0682352941176471	0.190123456790123	0	0.259259259259259	0.102941176470588	0.0355987055016181	7.09115111123154	24.262682421387	15.2678933161651	16.8290007639224	-0.127072864742992	8.28607399321462	-0.011148209102808	0.184140102438499	-0.343056837467322	9.93718166151812	-0.00210020067913297	0.235138203204863	28.0133399572337	0	15.2678933161651	9.2032702976072	0.0376470588235294	37.6531942633638	88.8355754432111	28.0133399572337	56.447794900273	54.3642195152272
fb_rec20p_per6	5	20	4	JAR_FilterBank	7	110	1	2	347	401	64	0	0	0.0439189189189189	0.159600997506234	0	0.0714285714285714	0.101694915254237	0.021505376344086	6.0009167765647	21.2317041014571	24.6124525179999	20.2153924964151	0.140499201734666	7.87724317747071	-0.00262965210288356	0.13305053759097	0.423019001562373	7.66369258781482	0.00743808374158251	0.115602818555901	37.0691324284561	0	24.6124525179999	10.5221582802995	0.0202702702702703	48.5488126649077	97.6448299842884	37.0691324284561	55.3699470309451	69.5289294305822
fb_rec20p_per6	5	20	4	JAR_FilterBank	7	110	1	3	329	446	61	0	0	0.0407523510971787	0.13677130044843	0	0.0615384615384615	0.0256410256410256	0.0355555555555556	5.84431683960948	19.4629975437331	22.8851795425136	17.7850774575418	0.0110593798868643	5.27677204458855	0.00235780771765819	0.154711671643099	0.144799814600592	3.33294461992188	-0.00722015269336759	0.144812104335661	31.5837333565748	0	22.8851795425136	11.0129610683638	0.0282131661442006	42.1144164759725	141.54311982132	31.5837333565748	63.2252964426877	68.4956306711804
fb_rec20p_per6	5	20	4	JAR_FilterBank	7	110	1	2	381	394	15	0	0	0.00911854103343465	0.0380710659898477	0	0	0	0	3.83325843780801	14.5893872102254	30.3968724228958	16.0255569063046	-0.00877833780683368	2.84580437399936	-0.00327452981209728	0.157586463797917	-0.143520538878312	1.04437098156534	-0.0147761981589865	0.160697924946708	36.5441188623929	0	30.3968724228958	6.64392487838125	0	41.9125964010283	75.8242852774025	36.5441188623929	40.5248226950355	50.5041602261278
fb_rec20p_per6	5	20	4	JAR_FilterBank	7	110	1	2	362	583	113	0	0	0.0748502994011976	0.193825042881647	0	0.145833333333333	0.0612244897959184	0.0515021459227468	7.63189668178929	25.7980086353379	20.1002984544248	19.9513357912542	0.13785291265721	7.56692660094017	0.000235374817987949	0.152165228857768	-0.555426217504856	14.2157757842945	0.00295879585822745	0.14717465575068	36.1378794252693	0	20.1002984544248	12.6680844581747	0.0179640718562874	39.8376383763838	127.661880939689	36.1378794252693	51.2844272844273	86.3343021323593
fb_rec20p_per6	5	20	4	JAR_FilterBank	7	110	1	2	391	607	139	0	0	0.0461538461538462	0.228995057660626	0	0.162162162162162	0.0980392156862745	0.0169491525423729	6.96987663817428	22.9377120459256	19.0279865678015	20.5709098514896	-0.34484189171504	10.4732191383851	0.0143154783977474	0.234721566931373	0.0056816100554321	9.72523170190497	-0.00214535631593156	0.102950608259332	35.8574171705113	0	19.0279865678015	9.45634693427668	0.0215384615384615	38.5169340463458	113.948469628087	35.8574171705113	59.3037037037037	68.7272800253934
fb_rec20p_per6	5	20	4	JAR_FilterBank	7	110	1	5	331	363	59	0	0	0.0189393939393939	0.162534435261708	0	0.0645161290322581	0.0317460317460317	0.00588235294117647	6.98125454373259	24.4410937301753	26.3308357129161	20.5453309307553	0.427573564062721	6.61215696408171	-0.0070617501883814	0.149493146605186	0.764347889100865	7.69653643921581	-0.0102631120911218	0.15545172946562	37.7103375145439	0	26.3308357129161	11.5150531202541	0.0340909090909091	42.3834808259587	109.212920365817	37.7103375145439	47.4392523364486	63.8306411724809
fb_rec20p_per6	5	20	4	JAR_FilterBank	7	110	1	1	339	577	164	0	0	0.140243902439024	0.2842287694974	0	0.0754716981132075	0.111111111111111	0.11731843575419	7.75770981376182	27.0440014593041	11.8713300272595	19.4660769418758	-0.797759063484662	16.2506699208798	-0.023213077215905	0.367959264131045	0.611129567735912	25.0760954718658	-0.0187741075933245	0.207288424747698	24.5455597323244	0	11.8713300272595	14.3411657457138	0.0487804878048781	37.9538461538462	126.376985145194	24.5455597323244	36.6311111111111	74.1358532494335
fb_rec20p_per6	5	20	4	JAR_FilterBank	7	110	1	2	387	506	139	0	0	0.0710059171597633	0.274703557312253	0	0.0930232558139535	0.0612244897959184	0.0423280423280423	9.129417259926	28.9227375949478	19.8550934568524	22.9219844461939	-0.319008162637451	13.6235231344398	0.0122815500605019	0.299822952233357	-0.162642570679952	3.45235103493162	0.0110460846571798	0.153211443703701	35.6574710649289	0	19.8550934568524	15.9929580948226	0.0473372781065089	7.68577494692144	120.476796518438	35.6574710649289	38.5679723502304	75.2493334685489
fb_rec20p_per6	5	20	4	JAR_FilterBank	7	110	1	3	417	480	62	0	0	0.0712401055408971	0.129166666666667	0	0.0606060606060606	0.157894736842105	0.0492424242424242	4.58754026926114	16.4013434281496	21.7715943584378	18.4800668198568	0.565257893941662	6.38386134242078	-0.00610297902896283	0.143418170394799	0.389547367687694	19.5933321104378	0.00942174954594264	0.311909376717975	28.2167263192397	0	21.7715943584378	8.06278470657344	0.0158311345646438	9.01079913606911	101.463137549529	28.2167263192397	27.6699168339547	70.4422651269162
fb_rec20p_per6	5	20	4	JAR_FilterBank	7	110	1	6	443	652	86	0	0	0.0380710659898477	0.131901840490798	0	0.03125	0	0.0307167235494881	5.25971611833272	19.8664671653918	23.3531448207738	19.6244790561007	0.0203158538912871	6.10127014562151	0.00111446313483144	0.182230000031017	0.448410818443272	9.39123756975737	0.00904750016125713	0.139139012527644	34.8500314770992	0	23.3531448207738	10.5270230054971	0	32.8599348534202	97.7907506910214	34.8500314770992	38.149863760218	65.0854158723059
fb_rec20p_per6	5	20	4	JAR_FilterBank	7	110	1	2	305	284	30	0	0	0.0148514851485149	0.105633802816901	0	0.0357142857142857	0.05	0	3.8229786867284	14.2498018842636	25.3971368169407	20.51406574424	0.19585596152844	7.04686908288808	0.0143887769105924	0.147051606788516	0.536042772201023	9.75803033871984	0.00869980639918272	0.164993958217696	37.6682043707081	0	25.3971368169407	7.89503825737832	0.0099009900990099	26.4888888888889	84.102775386768	37.6682043707081	29.656380952381	57.9770093232753
fb_rec20p_per6	5	20	4	JAR_FilterBank	7	110	1	2	298	544	100	0	0	0.0577617328519856	0.183823529411765	0	0.119047619047619	0.0746268656716418	0.024390243902439	5.33438569350569	18.4291762297074	17.3010398670855	19.8896654094286	0.123585256099169	11.7654698766496	-0.00240707880682975	0.15378174795232	-0.0724617985684562	15.8752269738648	0.00164017132900328	0.158489975460767	34.9778009946771	0	17.3010398670855	10.4042827915794	0.0397111913357401	13.0187265917603	125.948542254114	34.9778009946771	41.6840277777778	82.5447587505708
fb_rec20p_per6	5	20	4	JAR_FilterBank	7	110	1	4	515	911	119	0	0	0.0565302144249513	0.130625686059276	0	0.09375	0.0617283950617284	0.0532994923857868	5.95938990753304	22.029309484919	20.7369964163579	18.0115685928542	-0.0713267113558017	6.81752850100171	-0.000339702605379661	0.17448177162724	0.315221077117559	11.0280035742493	-0.0022982821789822	0.137639393765218	31.0417883503243	0	20.7369964163579	8.798458771455	0.00389863547758285	26.7803738317757	91.014546169077	31.0417883503243	37.7211136890951	63.784523125792
fb_rec20p_per6	5	20	4	JAR_FilterBank	7	110	1	3	253	420	106	0	0	0.0269058295964126	0.252380952380952	0	0.0392156862745098	0.08	0	9.11606139262866	28.9661802442573	18.3784125156604	21.9589512793595	0.766277129259421	14.6430889156759	0.0266719113328745	0.565372228738827	0.200764287008912	5.49056525376729	0.0379709302955857	0.486254167876965	38.6559368282783	0	18.3784125156604	16.1384407096511	0.0672645739910314	35.433242506812	159.158254700965	38.6559368282783	39.0687722873153	74.6435998211883
fb_rec20p_per6	5	20	4	JAR_FilterBank	7	110	1	1	371	499	112	0	0	0.106017191977077	0.224448897795591	0	0.130434782608696	0.2	0.0798319327731092	8.59163819774279	28.4432553082971	18.5086587611607	20.2354472563908	-0.0822671609829899	10.0253085613591	-0.00597441659288189	0.161495271269355	-0.0217662770927044	10.9200235493679	-0.0236219907522817	0.260818322755655	28.5826763541433	0	18.5086587611607	12.5494298959848	0.0200573065902579	15.6069868995633	127.851196137159	28.5826763541433	35.8841019214703	80.1670229206074
fb_rec20p_per6	5	20	4	JAR_FilterBank	7	110	1	4	478	749	202	0	0	0.0843881856540084	0.269692923898531	0	0.193548387096774	0.161290322580645	0.0538243626062323	9.50193735268827	28.8425237268143	18.9042071631814	22.2491661647546	-0.82419639015187	13.0796563373285	0.0172395797347443	0.386257509300513	1.01809534592459	16.9889523089787	0.00476458748450111	0.153108784859269	32.8428787092706	0	18.9042071631814	10.7733144131685	0	35.5905044510386	93.6612004745646	32.8428787092706	43.6399541021228	61.782114591768
fb_rec20p_per6	5	20	4	JAR_FilterBank	7	110	1	4	260	439	145	0	0	0.127490039840637	0.330296127562642	0	0.253731343283582	0.155555555555556	0.064	10.3386419734438	32.1564543663466	15.7077645482692	21.4195280172164	0.0224837206903128	16.5466355795837	-0.00965355208525218	0.306896489501468	-4.69840612548381	30.5465861080562	0.00419046015334525	0.167167562459685	31.9944222495835	0	15.7077645482692	17.5764410628043	0.0119521912350598	48.2144772117963	136.242814171988	31.9944222495835	50.2983286029644	82.1802699506193
fb_rec20p_per6	5	20	4	JAR_FilterBank	7	110	1	5	376	519	121	0	0	0.0645161290322581	0.233140655105973	0	0.0810810810810811	0.0983606557377049	0.0299145299145299	9.41358306606618	31.1819418236501	20.7503769882735	22.2502066699842	0.257129261036691	11.7323041149269	-0.00248549313760946	0.230249128070967	0.856099957108885	18.3903698320114	0.00761079848240662	0.183606658505217	36.1342593184762	0	20.7503769882735	11.3549823125757	0.0498533724340176	46.0298507462687	116.650581144664	36.1342593184762	56.0603773584906	48.4311067222494
fb_rec20p_per6	5	20	4	JAR_FilterBank	7	110	1	1	218	245	58	0	0	0.127388535031847	0.236734693877551	0	0.104166666666667	0.130434782608696	0.119402985074627	7.01353627079168	24.5157047673633	14.2790914819248	17.0288526574912	0.129569820795538	7.16715373050479	-0.0130723940364008	0.168007533346809	0.335463850671369	14.1076179836925	-0.00255294777437275	0.18038457451718	20.752751095691	0	14.2790914819248	14.576146299642	0.0191082802547771	23.0714285714286	128.326916762085	20.752751095691	36.031884057971	97.0753369319106
fb_rec20p_per6	5	20	4	JAR_FilterBank	7	110	1	3	362	368	36	0	0	0.043046357615894	0.0978260869565217	0	0.0625	0	0.00483091787439614	5.45791052137161	20.3399115178074	28.8081228193079	17.6769339884961	0.165851082674253	4.05402777364384	0.00463286813316916	0.16250227766198	0.105877039871058	3.5664507640439	0.00786789011095045	0.15631244661342	37.4717475007414	0	28.8081228193079	7.74904524754972	0.0264900662251656	11.2696629213483	119.581077597263	37.4717475007414	36.953125	73.8730080850199
fb_rec20p_per6	5	20	4	JAR_FilterBank	7	110	1	4	325	495	82	0	0	0.04375	0.165656565656566	0	0.0943396226415094	0.0476190476190476	0.0268817204301075	7.99689980790943	27.9621198095308	23.0805672063457	19.3702911797557	-0.0218604239835483	7.13987425634471	0.00235554963700998	0.161993233690523	0.469401400168137	12.4075324842836	0.00135716967591073	0.158374957577115	35.573165511443	0	23.0805672063457	12.9019480077338	0.0125	16.1376344086021	117.144980827968	35.573165511443	39.0557407407407	73.5759192069648
fb_rec20p_per6	5	20	4	JAR_FilterBank	7	110	1	5	420	593	109	0	0	0.0398009950248756	0.183811129848229	0	0.163636363636364	0.0465116279069767	0.013745704467354	8.01942212619862	26.6157889922509	25.0162285813468	22.4033246431774	0.054569228449359	7.17403825011882	0.00343851416766595	0.319942640455482	-0.288545728643293	4.78307061648445	0.0158378133070132	0.163618031939711	39.9319251716604	0	25.0162285813468	13.0187260205788	0.0149253731343284	18.9413854351687	110.10102983961	39.9319251716604	46.3235235235235	55.3840448162769
fb_rec20p_per6	5	20	4	JAR_FilterBank	7	110	1	2	271	230	41	0	0	0.0523560209424084	0.178260869565217	0	0.133333333333333	0.0303030303030303	0	7.00493267933153	23.4640269653466	26.6534262607045	20.9250163983043	-0.60583838144878	6.85057312249752	0.0221303367553882	0.213895563998808	-0.00787667032053673	1.00491529426481	0.0254114716071873	0.148323381577791	39.7877617820102	0	26.6534262607045	13.2200289636896	0.0418848167539267	11.5	140.40313514571	39.7877617820102	22.8551020408163	79.3729536539733
fb_rec20p_per6	5	20	4	JAR_FilterBank	7	110	1	3	351	519	64	0	0	0.023121387283237	0.123314065510597	0	0.0925925925925926	0.0666666666666667	0	6.12244175888379	21.0999455495287	27.7464046520193	19.3905313138486	0.0833796369681101	5.16402847393938	-0.00839529320348873	0.151678900565636	0.138463271964712	2.0526506233958	-0.00925124849625616	0.149233514061748	40.9242702166855	0	27.7464046520193	11.6043959093022	0.0289017341040462	44.0162271805274	102.746351488865	40.9242702166855	51.6013745704467	59.1909172741832
fb_rec20p_per6	5	20	4	JAR_FilterBank	7	110	1	3	434	468	60	0	0	0.0056657223796034	0.128205128205128	0	0.0714285714285714	0	0	5.41519356879962	20.2284870721138	26.6752482943262	18.6313038707397	0.391567817348163	4.12850612078027	0.00536581022942404	0.185998497452533	0.0338606826720855	1.14115837040404	0.00830549065609714	0.146380363298609	37.4915865270373	0	26.6752482943262	12.1571951930193	0.0056657223796034	43.8237885462555	90.9280323707982	37.4915865270373	63.8415841584158	62.2626458880347
fb_rec20p_per6	5	20	4	JAR_FilterBank	7	110	1	5	305	341	36	0	0	0.0119521912350598	0.105571847507331	0	0.0263157894736842	0.0163934426229508	0.0065359477124183	4.47771635367169	16.1878951354721	26.4324815296889	20.6680640085521	0.0582399292268545	5.90594678956395	-0.00190455400645473	0.140457284200894	-0.127633788380072	2.52067805444926	-0.00802527835275168	0.131460604205564	37.885357666864	0	26.4324815296889	8.78226562291323	0.00796812749003984	27.4642857142857	99.4497033520045	37.885357666864	35.1889400921659	43.7086976182373
fb_rec20p_per6	5	20	4	JAR_FilterBank	7	110	1	2	331	306	36	0	0	0.015625	0.117647058823529	0	0.0810810810810811	0	0	6.00997258484134	21.5515977424771	30.3284507432842	18.3700467536795	0.244292244348672	4.18750945176917	-0.0129292632037713	0.154656264364311	-0.0266301917824642	2.20602439806686	-0.0114595311650825	0.149351286946891	40.3470614397697	0	30.3284507432842	11.849922219818	0.01171875	19.2162162162162	114.329440166063	40.3470614397697	32.8524590163934	80.1047053944873
fb_rec20p_per6	5	20	4	JAR_FilterBank	7	110	1	5	569	786	108	0	0	0.0392156862745098	0.137404580152672	0	0.12	0.0444444444444444	0.0244988864142539	6.65945965129086	23.1715565586892	24.8614006015797	18.7263024917982	-0.181366592304997	6.15993563783355	-0.000166306100197322	0.202216047493008	0.158699364686764	7.77513401862391	0.00209451333986836	0.143076152167428	34.7338782447261	0	24.8614006015797	10.484150529272	0.0106951871657754	29.3746630727763	115.749962289969	34.7338782447261	48.7871227364185	66.1516329618492
fb_rec20p_per7	7	20	2.85714285714286	FilterBank	7	110	1	4	512	915	172	0	0	0.0393700787401575	0.187978142076503	0	0	0.162162162162162	0.0201511335012594	10.8820312843404	30.1774616501406	20.7685876261639	21.0337753394086	-0.00163246450928197	9.62467048820636	0.00311399483928713	0.291987711756248	0.359195031044417	5.50880805440739	0.0157911315227411	0.211851626718312	36.668678306268	0	20.7685876261639	10.7794683426627	0.00590551181102362	19.6037296037296	103.15522436016	36.668678306268	34.2800144910035	64.5964158779657
fb_rec20p_per7	7	20	2.85714285714286	FilterBank	7	110	1	3	450	441	35	0	0	0.0196078431372549	0.0793650793650794	0	0	0	0.0220820189274448	7.51176781988439	23.4194573971479	31.0056268196915	17.173678413597	0.0536392989489212	3.50857759763996	0.0145328465571857	0.149828227872373	0.954117203399473	9.85197413075371	0.0118032620063115	0.157140989117986	35.224546265148	0	31.0056268196915	10.1850767717578	0.0147058823529412	13.2250580046404	106.05511039268	35.224546265148	34.2209944751381	73.9362291749036
fb_rec20p_per7	7	20	2.85714285714286	FilterBank	7	110	1	1	277	291	90	0	0	0.0588235294117647	0.309278350515464	0	0.0731707317073171	0.0454545454545455	0.0333333333333333	9.43173314923159	27.8218111676114	17.1724950333127	22.0164851465481	1.77344569061173	11.3175392117576	-0.0158141560835943	0.397580834275268	1.73288244061836	17.7093210965133	-0.000411107501852513	0.149899478450782	33.2982768488467	0	17.1724950333127	14.5593684118121	0.0980392156862745	67.4545454545455	153.719148981138	33.2982768488467	45.6533333333333	79.2223834529613
fb_rec20p_per7	7	20	2.85714285714286	FilterBank	7	110	1	0	261	300	97	0	0	0.110047846889952	0.323333333333333	0	0.087719298245614	0.0689655172413793	0.126126126126126	9.96402768383703	29.7449061997624	16.6864323362929	21.0893839075666	-0.164753999538004	12.8375490467996	0.00569652029215831	0.117992252065095	0.765659309534752	14.4681711559605	-0.00434355031789978	0.179879712305672	30.1152126398371	0	16.6864323362929	15.6266246590756	0.076555023923445	-12.4075471698113	123.577542594654	30.1152126398371	15.0614173228346	86.2758717095636
fb_rec20p_per7	7	20	2.85714285714286	FilterBank	7	110	1	3	268	527	141	0	0	0.0570342205323194	0.267552182163188	0	0.101694915254237	0.0491803278688525	0.0340136054421769	9.37785885062206	26.5662960864667	17.4125929401698	21.0732298265697	0.211806354814006	13.9505656501038	-0.00162270060324957	0.170900560037867	0.0606518602884541	6.1211616561368	0.00982010666175508	0.16206711468257	36.0062911076402	0	17.4125929401698	12.3311274843646	0.0456273764258555	-15.4556701030928	121.631202303419	36.0062911076402	37.704475091472	81.8474995955994
fb_rec20p_per7	7	20	2.85714285714286	FilterBank	7	110	1	2	276	368	116	0	0	0.125523012552301	0.315217391304348	0	0.129032258064516	0.175675675675676	0.113207547169811	8.66927955910536	25.4317302950477	14.3804095901035	20.0454663712245	-0.00207557041371879	10.1191402083414	0.00470208449729032	0.199128821837537	-0.777307914624559	16.2971845726658	0.0129650589528243	0.147000094034127	25.3135674712754	0	14.3804095901035	11.0317716577033	0.0418410041841004	-7.80456026058632	84.4402614687676	25.3135674712754	1.41461009691233	82.8071307355252
fb_rec20p_per7	7	20	2.85714285714286	FilterBank	7	110	1	3	242	352	106	0	0	0.084070796460177	0.301136363636364	0	0.125	0.104477611940299	0.0471698113207547	9.56080974032275	27.0137210557349	17.1962134701066	21.4731872148902	-1.44920682965736	12.5353865986439	-0.0152908656548772	0.219418723806922	1.8950821340376	25.293316248639	-0.0189199094267666	0.166286463115449	32.9226762545645	0	17.1962134701066	13.6177154262548	0.0884955752212389	-10.816199376947	120.605738821833	32.9226762545645	23.6390342052314	78.7789457514106
fb_rec20p_per7	7	20	2.85714285714286	FilterBank	7	110	1	1	232	277	89	0	0	0.119496855345912	0.32129963898917	0	0.179487179487179	0.16	0.0606060606060606	9.40829008002061	28.6408585050859	13.6591127169742	20.1520405697277	-0.292862064779109	11.0332790689849	0.0266611775978105	0.44005074220791	-0.275451310241286	12.132427476343	0.00245940578168129	0.188466341951941	28.6719229957367	0	13.6591127169742	12.9940978804548	0.0817610062893082	-19.3702127659574	154.697427194908	28.6719229957367	25.1269379844961	108.484810684492
fb_rec20p_per7	7	20	2.85714285714286	FilterBank	7	110	1	4	584	657	93	0	0	0.0633147113594041	0.141552511415525	0	0	0.166666666666667	0.0426966292134831	8.64194391432338	26.2969683885749	26.0066300146811	19.3747601814995	-0.0119622708862817	8.14078744286362	0.0101724269600724	0.379668939654556	0.323355466490724	19.8565555094426	0.00459105639593643	0.185545536023992	33.1071185249991	0	26.0066300146811	8.76459434000519	0.0074487895716946	50.8825396825397	94.4127974600022	33.1071185249991	51.9762351469669	50.8896296990819
fb_rec20p_per7	7	20	2.85714285714286	FilterBank	7	110	1	2	308	419	115	0	0	0.0752688172043011	0.274463007159905	0	0.111111111111111	0.0961538461538462	0.0404624277456647	9.32680744341009	28.0644918626468	18.5111596773381	21.4378380110579	0.246173544559474	12.5749684866629	0.000287147963913628	0.205525491797915	0.131533733804212	18.6031776886926	-0.00161945891382458	0.148088266966993	31.5009017569653	0	18.5111596773381	14.0126358311637	0.032258064516129	21.4516971279373	108.404237378744	31.5009017569653	35.7714285714286	76.9370174289648
fb_rec20p_per7	7	20	2.85714285714286	FilterBank	7	110	1	3	422	531	79	0	0	0.05	0.148775894538606	0	0.0588235294117647	0.0185185185185185	0.0512820512820513	10.3493250247095	30.7566088091932	26.095515502213	18.4174132228057	0.158241433841378	5.08272233291143	-0.000485337332141095	0.149454350015439	-0.0366679518703169	13.3700770170616	0.00691363828419195	0.142706417291655	34.6517120120374	0	26.095515502213	11.4298553723073	0.0277777777777778	42.6215139442231	98.0081678910083	34.6517120120374	53.1293442622951	60.9210360314688
fb_rec20p_per7	7	20	2.85714285714286	FilterBank	7	110	1	1	199	220	100	0	0	0.158730158730159	0.454545454545455	0	0.159090909090909	0.128205128205128	0.138888888888889	9.11376403405958	26.6582944194544	8.02737238691143	17.9329754749145	0.0814962555308775	22.2753624444283	0.0302226409936656	0.41136569842785	3.82124797318771	22.0638000161573	-0.0259861588515041	0.137776932333863	20.614629304506	0	8.02737238691143	15.1475005115646	0.0634920634920635	-18.9378531073446	133.094812334533	20.614629304506	17.4820512820513	138.183819107911
fb_rec20p_per7	7	20	2.85714285714286	FilterBank	7	110	1	3	324	468	125	0	0	0.082018927444795	0.267094017094017	0	0.0980392156862745	0.0714285714285714	0.0591133004926108	10.1326079186164	30.11487725248	19.0831254114784	22.7637963330828	-1.42388756328373	14.7326656608206	-0.00770317638705372	0.421823775172655	-1.43766285999445	16.3967801031911	0.00510361271576482	0.15594432728246	33.9991692716062	0	19.0831254114784	13.2815403777906	0.0378548895899054	26.3293556085919	108.339694256065	33.9991692716062	39.5596546437505	51.4730546473815
fb_rec20p_per7	7	20	2.85714285714286	FilterBank	7	110	1	4	240	253	77	0	0	0.04375	0.304347826086957	0	0.0277777777777778	0.0588235294117647	0.0135135135135135	7.76271001243077	24.3615869745548	17.8035940115351	23.5040447122843	0.2198930862449	11.1101456084567	0.0043036034461525	0.351022905588987	0.0487958726478094	9.2954615634551	-0.010845327348454	0.185608309893018	36.6381907948014	0	17.8035940115351	14.4314060361951	0.10625	67.9122807017544	181.8392358374	36.6381907948014	55.8679050567595	96.7017052770899
fb_rec20p_per7	7	20	2.85714285714286	FilterBank	7	110	1	3	488	699	138	0	0	0.0626349892008639	0.197424892703863	0	0.142857142857143	0.152542372881356	0.0418994413407821	7.75469816912452	23.6255961050537	22.0689781444927	19.7987982990253	0.105941942906648	7.13872863679719	-0.00544660822214083	0.147661231530554	0.300942043532584	13.0570672917797	-0.0111318967025582	0.149141018376155	33.609891704386	0	22.0689781444927	9.17828816394839	0.0215982721382289	23.0689127105666	101.491287508207	33.609891704386	47.1594750376873	77.7456208722425
fb_rec20p_per7	7	20	2.85714285714286	FilterBank	7	110	1	2	302	360	81	0	0	0.05	0.225	0	0.0816326530612245	0.0625	0.0316455696202532	8.7159294400351	26.1596025004793	21.074441359805	20.3729709462914	-0.379806549311195	9.1797925912677	-0.00220419966639858	0.140705868714951	0.230849072093477	4.93168463681917	0.00435268991449117	0.131434758224493	34.6625314803025	0	21.074441359805	12.2326122535667	0.0576923076923077	61.2682926829268	132.821468437185	34.6625314803025	70.2448979591837	84.3388843282452
fb_rec20p_per7	7	20	2.85714285714286	FilterBank	7	110	1	2	421	653	156	0	0	0.114754098360656	0.238897396630934	0	0.166666666666667	0.0980392156862745	0.119850187265918	7.75187109762812	23.4583564748116	14.7311398666499	18.3724011706903	-0.851086561698946	14.0784630341682	-0.00180419044419828	0.281137637955895	1.48387435763537	22.5408230452603	0.0155061020685689	0.196904565813839	24.7410492998609	0	14.7311398666499	11.5070881134684	0.0327868852459016	48.5205930807249	122.647657978326	24.7410492998609	51.7606805680384	86.7316262666998
fb_rec20p_per7	7	20	2.85714285714286	FilterBank	7	110	1	3	311	347	74	0	0	0.0541666666666667	0.213256484149856	0	0.102564102564103	0.0983606557377049	0.00740740740740741	7.87033167887501	25.4467516543685	22.2728497401631	21.7126720312713	-0.780695593251417	9.35457981812067	-0.0129868602510969	0.262781033079783	-0.475430822463941	10.0986746122891	0.00116212629296047	0.323973253368919	36.6304393617039	0	22.2728497401631	13.1300046985169	0.0208333333333333	50.615873015873	121.677716227031	36.6304393617039	43.6693183432793	85.8700648077522
fb_rec20p_per7	7	20	2.85714285714286	FilterBank	7	110	1	4	397	575	58	0	0	0.0125	0.100869565217391	0	0	0.0238095238095238	0.00416666666666667	6.96683802197424	22.4072135926122	25.9592018898293	19.3460986656566	0.284971302966716	5.18970567577866	0.00838484603028452	0.172531017698248	0.0265621745681176	1.36676981369474	0.00202560066520403	0.149527980652896	42.2909531621913	0	25.9592018898293	8.1900279978774	0.025	32.8057040998217	91.580758874212	42.2909531621913	49.8796992481203	49.978265101449
fb_rec20p_per7	7	20	2.85714285714286	FilterBank	7	110	1	1	279	298	68	0	0	0.0567685589519651	0.228187919463087	0	0.0434782608695652	0.0757575757575758	0.0434782608695652	8.3690097133265	27.7562119409339	22.8965011867077	20.5999899821985	-0.202502288084926	10.7837620649347	-0.00597386134027398	0.157788890633072	0.36951767590234	12.3432141156458	-0.00216831959654168	0.146922844614255	33.2781221471502	0	22.8965011867077	13.325315178064	0.0218340611353712	-1.48148148148148	119.62045627373	33.2781221471502	9.21321044546851	79.243670127768
fb_rec20p_per7	7	20	2.85714285714286	FilterBank	7	110	1	4	451	456	73	0	0	0.103626943005181	0.160087719298246	0	0.0769230769230769	0	0.109677419354839	7.44450538300912	23.4154245253029	22.355792462899	18.8198297933054	0.234369281486409	7.11466950528783	-0.00640839258514161	0.137446920610291	0.443490912955216	14.1066318151721	-0.00662023120945748	0.134933296566889	27.2430733145061	0	22.355792462899	10.3733053203396	0.0181347150259067	24.9406392694064	90.9939578125958	27.2430733145061	37.3971428571429	58.3705630255225
fb_rec20p_per7	7	20	2.85714285714286	FilterBank	7	110	1	3	276	456	171	0	0	0.120331950207469	0.375	0	0.290322580645161	0.0941176470588235	0.0458715596330275	11.1974834364546	31.7785347971491	13.9809874154693	22.080478855973	-1.25772135818887	18.9442139828429	-0.0135444694615756	0.437568439842195	-1.67553091317601	10.1825249689127	-0.00101201308929131	0.164605927887835	34.6298841346747	0	13.9809874154693	14.5664798316816	0.0497925311203319	-4.03217158176944	134.407657211358	34.6298841346747	20.1748387096774	81.4389689644556
fb_rec20p_per7	7	20	2.85714285714286	FilterBank	7	110	1	2	331	484	156	0	0	0.0606060606060606	0.322314049586777	0	0.16	0.0645161290322581	0.010752688172043	9.49403069121967	28.5195770402942	14.3441459300053	22.1837020814352	-0.755542233184384	13.7961576127175	-0.000815912096482098	0.538358782577101	-0.0362212636606565	1.68609587006964	-0.00719667659553719	0.159941302426597	34.007172512817	0	14.3441459300053	11.7097426203072	0.037037037037037	8.29596412556054	133.80147068216	34.007172512817	44.3869528854196	53.3047814690463
fb_rec20p_per7	7	20	2.85714285714286	FilterBank	7	110	1	0	239	323	112	0	0	0.0494505494505494	0.346749226006192	0	0.0465116279069767	0	0.0595238095238095	8.27002707717942	25.166019892076	13.54539029701	21.5666458625998	-0.0846908575962138	18.4826864784264	0.0116769117723958	0.206208937914376	-1.0991694054155	19.7694071107349	-0.00406700531715673	0.149583259370704	32.6201409322337	0	13.54539029701	11.8186645116708	0.0934065934065934	42.5543859649123	129.057204357373	32.6201409322337	46.4949258391881	48.7614706901926
fb_rec20p_per7	7	20	2.85714285714286	FilterBank	7	110	1	2	299	505	139	0	0	0.0456140350877193	0.275247524752475	0	0.04	0.0845070422535211	0.0294117647058824	10.3523793151104	29.4008703828228	17.8467968362431	22.3895259782051	0.0565932164329834	12.9034715307987	-0.0030785016611914	0.206730143364304	0.107338331917878	8.16766457155254	-0.0215617827066175	0.148650475429241	36.9278402809553	0	17.8467968362431	13.6600742968097	0.0596491228070175	21.2416666666667	117.761267000517	36.9278402809553	54.8794168519891	67.440655898825
fb_rec20p_per7	7	20	2.85714285714286	FilterBank	7	110	1	2	303	459	147	0	0	0.152727272727273	0.320261437908497	0	0.297872340425532	0.137254901960784	0.121212121212121	9.47643779619532	27.4178639197928	15.4403182315813	20.7326303190504	-0.274429070022564	12.9002884843526	0.0224587757103262	0.196655729278598	0.561956295992459	17.0766327672266	0.0416401223916808	0.447241878506446	27.9887802590585	0	15.4403182315813	12.402098378715	0.0509090909090909	28.526558891455	148.178757978803	27.9887802590585	41.58407960199	75.8912046634763
fb_rec20p_per7	7	20	2.85714285714286	FilterBank	7	110	1	4	312	445	122	0	0	0.0915032679738562	0.274157303370787	0	0.135135135135135	0.0735294117647059	0.0625	9.79505188885893	28.7064579210972	18.5418900517134	20.8953540182645	-0.143691305807285	9.84570382065158	-0.00562660995815664	0.166519889163629	0.0988099239880994	12.7342523028187	-0.00835899863979803	0.151690795117089	30.4111700062804	0	18.5418900517134	12.2547827125363	0.0196078431372549	37.1712158808933	125.75035667639	30.4111700062804	45.5439241486068	84.7179133635398
fb_rec20p_per7	7	20	2.85714285714286	FilterBank	7	110	1	3	374	506	114	0	0	0.0883190883190883	0.225296442687747	0	0.115384615384615	0.132530120481928	0.0649350649350649	9.70781901271983	28.4938482748837	20.9776874645612	22.1200691826261	-0.601567428052182	9.80126174287513	-0.000585051558127362	0.245277578492647	-1.10479814315643	13.4805347929055	0.00223416643063467	0.175559704050411	32.3295691571711	0	20.9776874645612	10.8061069600273	0.0227920227920228	32.2197802197802	95.5495353457955	32.3295691571711	50.9347553518504	64.8962870411799
fb_rec20p_per7	7	20	2.85714285714286	FilterBank	7	110	1	1	300	445	170	0	0	0.165384615384615	0.382022471910112	0	0.0909090909090909	0.204545454545455	0.126984126984127	10.2590426223343	29.3913079228072	9.78961579818986	19.5269516796257	0.147403844794227	18.7198639515214	0.0352922256946252	0.580097122678594	3.48453641162424	30.3533780488471	0.0549474568716127	0.432570828228241	21.7743245908846	0	9.78961579818986	14.2433634785035	0.0730769230769231	-9.73118279569892	131.133366797112	21.7743245908846	12.9408519269777	93.660627075095
fb_rec20p_per7	7	20	2.85714285714286	FilterBank	7	110	1	3	300	462	135	0	0	0.0802919708029197	0.292207792207792	0	0.13953488372093	0.0408163265306122	0.0191082802547771	8.97946274832661	27.3247866757334	19.1489314424491	23.6891483328954	1.25250474111328	14.9022083703247	0.0110677637315401	0.267936083327341	0.746748612189579	10.3389154904854	-0.00272943454192959	0.126060261664234	40.1990227237991	0	19.1489314424491	12.9542594358239	0.0583941605839416	7.5136476426799	105.931742255372	40.1990227237991	28.1828571428571	65.1587869786221
fb_rec20p_per7	7	20	2.85714285714286	FilterBank	7	110	1	4	312	465	147	0	0	0.110714285714286	0.316129032258064	0	0.228571428571429	0.15	0.102941176470588	9.30780083695046	28.0577046192022	15.7632911242555	21.3085096831154	-0.0914585164907755	12.0129684921743	0.0218034481078051	0.306586730223604	0.978779832854167	16.0626401179035	0.00965099114053642	0.179522074765916	30.8534850366319	0	15.7632911242555	12.9019935617128	0.0714285714285714	18.9441624365482	105.62337396943	30.8534850366319	30.5742774566474	81.1549296398735
fb_rec20p_per7	7	20	2.85714285714286	FilterBank	7	110	1	7	424	708	159	0	0	0.0660146699266504	0.224576271186441	0	0.196078431372549	0.0357142857142857	0.0442176870748299	11.0837693571877	32.5167553865818	21.2435597368451	22.5405299419406	0.210922608129334	12.8748118219007	0.0210599337974147	0.25473676371342	0.42855431874565	8.6783640672419	0.00630253795982825	0.140356266341016	36.881969440949	0	21.2435597368451	13.2375798205411	0.0293398533007335	31.3961136023916	116.507433585509	36.881969440949	48.9265671641791	65.2736972260467
fb_rec20p_per7	7	20	2.85714285714286	FilterBank	7	110	1	2	284	449	122	0	0	0.10188679245283	0.271714922048998	0	0.0930232558139535	0.138888888888889	0.0555555555555556	9.4335416041458	27.3899393930776	17.1686599129621	20.8752308022502	0.186900471426855	11.6916908120644	-0.00179594266061621	0.173659561742053	-1.24980269873528	17.4872462310117	-0.00491341901784473	0.14296253603897	31.6877676591657	0	17.1686599129621	12.9385269408927	0.0490566037735849	-31.65	130.315512630232	31.6877676591657	10.8932600112803	84.2832103186089
fb_rec20p_per7	7	20	2.85714285714286	FilterBank	7	110	1	3	305	437	113	0	0	0.0950570342205323	0.258581235697941	0	0.170212765957447	0.0576923076923077	0.0828402366863905	8.76290317465844	25.9883075112865	16.8716128293401	18.865183661228	-0.405145439926322	15.0045752933077	0.000990988237741523	0.207950490210984	0.163980922628867	14.7955429661143	0.00869127331069886	0.132983524104659	29.1407274117006	0	16.8716128293401	11.8827272363508	0.0304182509505703	1.42092457420925	157.685223491092	29.1407274117006	34.6196459166191	87.4057434297501
fb_rec20p_per7	7	20	2.85714285714286	FilterBank	7	110	1	6	437	684	165	0	0	0.0861244019138756	0.241228070175439	0	0.131578947368421	0.0735294117647059	0.0786885245901639	10.1194286522903	27.7881936280452	19.6999199069714	22.1364741286017	0.103102896215067	11.2868712356319	0.00823469282717584	0.260223297787074	1.59842539691405	17.7523767566562	0.0217315821120328	0.168217540372398	33.4643877603411	0	19.6999199069714	11.8253503518745	0.0334928229665072	8.63327948303716	86.0854523382212	33.4643877603411	26.3843044552347	62.7152942356668
fb_rec20p_per7	7	20	2.85714285714286	FilterBank	7	110	1	4	285	492	177	0	0	0.0970149253731343	0.359756097560976	0	0.234042553191489	0.121212121212121	0.0428571428571429	9.89698774616789	26.5000816397499	15.7800080302401	23.1044257437608	0.788766260270218	16.5213244215197	0.00186642423297067	0.296667293204127	-0.307233209701312	14.071639948564	0.0206549758204643	0.267997059587911	36.3539357601772	0	15.7800080302401	14.0388012252251	0.0858208955223881	44.5425287356322	170.37069886121	36.3539357601772	50.3701696678671	98.8103502200118
fb_rec20p_per7	7	20	2.85714285714286	FilterBank	7	110	1	0	251	374	99	0	0	0.0653061224489796	0.264705882352941	0	0.136363636363636	0.0338983050847458	0.0526315789473684	8.78571262650455	26.5796972740715	17.5486088139739	21.3484231375296	0.312968306371684	13.1539085928429	-0.00078461545067637	0.19256266983396	-0.149414327927149	7.27626339428821	0.0143876844479656	0.16496389408992	32.1754884127909	0	17.5486088139739	13.8468012101155	0.0448979591836735	13.3293413173653	113.186786180769	32.1754884127909	22.1016949152542	68.2913914401969
fb_rec20p_per7	7	20	2.85714285714286	FilterBank	7	110	1	4	293	368	89	0	0	0.0691244239631336	0.241847826086957	0	0.105263157894737	0.0625	0.0601503759398496	8.75603815681752	26.5181812946135	20.1672699819485	21.2732138982683	-0.105761357912615	9.97902677291825	-0.0082603157155594	0.276879922904521	1.57070858487846	16.0899092635221	0.0067230255810805	0.137275232367896	35.5662647946137	0	20.1672699819485	12.8958837529663	0.0645161290322581	26.1896024464832	101.835670655913	35.5662647946137	30.7514124293785	58.9759707494045
fb_rec20p_per7	7	20	2.85714285714286	FilterBank	7	110	1	3	225	368	141	0	0	0.147208121827411	0.383152173913043	0	0.2	0.142857142857143	0.0491803278688525	9.44729173068833	26.1050873743097	10.8019807631342	18.8035045725294	-0.522613593323101	14.2900351573649	0.0085826022807742	0.450105049486792	0.266762207990517	18.1741760025956	0.00662122116647338	0.133641374984261	26.1217891408923	0	10.8019807631342	13.4664263184327	0.0558375634517767	-24.2317073170732	134.268141847271	26.1217891408923	-13.9121137517507	73.0171843600639
fb_rec20p_per7	7	20	2.85714285714286	FilterBank	7	110	1	0	246	354	127	0	0	0.12	0.358757062146893	0	0.25	0.14	0.06	9.39872876628074	27.6327213001552	14.5581540559806	21.8178200504461	1.15526354572443	15.6085157688144	0.0171889233892666	0.351863521919963	0.712334250442681	6.39567072449387	-0.00969172090438256	0.243010297834584	33.7392587269062	0	14.5581540559806	14.1763919391019	0.065	28.4536082474227	119.438977691992	33.7392587269062	47.7514328808447	94.104968497642
fb_rec20p_per7	7	20	2.85714285714286	FilterBank	7	110	1	2	361	468	110	0	0	0.0788732394366197	0.235042735042735	0	0.169491525423729	0.134615384615385	0.0486725663716814	9.75128115560787	28.5973420018894	21.63714519396	20.3529396088352	-0.496205415611648	10.6570644545079	-0.00280307798966907	0.189103736154829	-0.262899612616418	13.5524187753422	-0.00306044835625841	0.179165062410255	32.6322931854182	0	21.63714519396	13.6679028483673	0.0253521126760563	55.7767441860465	169.847831028226	32.6322931854182	55.9204006325778	88.7360097725005
fb_rec20p_per7	7	20	2.85714285714286	FilterBank	7	110	1	2	366	507	135	0	0	0.102719033232628	0.266272189349112	0	0.268292682926829	0.0714285714285714	0.0810810810810811	9.83208364362801	29.1419113460051	18.4377400866235	20.279919019943	1.19412610382511	11.9243677520647	-0.00851735023956704	0.214947232131866	-0.324767558498023	19.5086029837372	-0.00370574312205081	0.132952046188376	30.5077841407988	0	18.4377400866235	11.9921401489119	0.027190332326284	20.7877461706783	90.9405581282205	30.5077841407988	36.371875	59.9574161793348
fb_rec20p_per7	7	20	2.85714285714286	FilterBank	7	110	1	3	264	380	125	0	0	0.0821917808219178	0.328947368421053	0	0.130434782608696	0.150943396226415	0.0341880341880342	9.83866904132984	28.4153930843284	16.1889655012005	23.0955633369117	-0.370672096205372	16.7936776285969	-0.0143390497387575	0.58548523338789	-0.292926174406823	14.1694267828437	0.0326137257812237	0.360178362572688	32.840357327848	0	16.1889655012005	15.0128977084665	0.0319634703196347	44.1921921921922	148.484915664247	32.840357327848	64.5246235246235	89.4095143906723
fb_rec20p_per7	7	20	2.85714285714286	FilterBank	7	110	1	3	327	471	126	0	0	0.0716612377850163	0.267515923566879	0	0.113636363636364	0.0784313725490196	0.0451977401129944	9.8706660773952	26.9665267542346	16.1377375285541	20.3566895617647	-0.564456402125318	13.2931507128873	-0.000144195782165717	0.36013758556037	0.395522441965915	11.5541666660217	0.00924986100937555	0.130479000225861	29.8920421371394	0	16.1377375285541	12.9832268751385	0.0325732899022801	55.4447058823529	137.134943788923	29.8920421371394	53.7554072096128	79.9141128669883
fb_rec20p_per7	7	20	2.85714285714286	FilterBank	7	110	1	2	320	418	108	0	0	0.0806451612903226	0.258373205741627	0	0.12962962962963	0.173076923076923	0.0196078431372549	9.77836602736181	27.7387120003147	19.4561368438081	19.2845256009363	-0.743316133211512	10.8274448461869	0.00849117397620053	0.202235226054706	-0.499377548195264	16.4648742082522	0.00349853562496058	0.214880124687191	30.2986700439173	0	19.4561368438081	13.0338083321593	0.0354838709677419	41.3894736842105	138.130472125225	30.2986700439173	66.0461412151067	63.2066278739258
fb_rec20p_per7	7	20	2.85714285714286	FilterBank	7	110	1	2	273	289	76	0	0	0.113207547169811	0.262975778546713	0	0.0357142857142857	0.189655172413793	0	6.6402903011718	21.5164072618072	17.5092115007451	21.419296635436	0.535502065494952	11.8046415349663	-0.0141596687580503	0.280202277133345	1.60443433304831	11.9074054590074	-0.0837739172318964	0.591186353467177	30.681116085191	0	17.5092115007451	9.46228284578696	0.0377358490566038	64.6588235294118	133.058292205314	30.681116085191	40.2688148788927	77.5616480940544
fb_rec20p_per7	7	20	2.85714285714286	FilterBank	7	110	1	6	338	518	146	0	0	0.0612903225806452	0.281853281853282	0	0.12962962962963	0.0545454545454545	0.0434782608695652	10.7717418626283	28.9624960621712	18.9370257832004	24.2188062456306	-0.374042894365901	16.7025974483326	0.0170557766152522	0.267427434891309	-0.569733164154279	7.50737483974909	0.00341377492202309	0.147771039751045	39.6643489059153	0	18.9370257832004	12.8977470115768	0.0419354838709677	11.8025751072961	110.762109092229	39.6643489059153	46.6008230452675	67.5734152281856
fb_rec20p_per7	7	20	2.85714285714286	FilterBank	7	110	1	2	189	270	95	0	0	0.106145251396648	0.351851851851852	0	0.147540983606557	0.140350877192982	0.0151515151515152	8.66313283451525	24.7139334019465	15.9601289586045	19.4513073988848	-0.462619923704129	12.5672762594414	-0.000566383541089056	0.12853728825366	0.407397676303986	3.57684531459248	0.00918801342636697	0.111588618454433	32.3630889512688	0	15.9601289586045	13.4048149791658	0.0502793296089385	61.6597510373444	154.742906401568	32.3630889512688	64.640365575019	84.2273495576002
fb_rec20p_per7	7	20	2.85714285714286	FilterBank	7	110	1	3	276	306	73	0	0	0.0752212389380531	0.238562091503268	0	0.145833333333333	0.032258064516129	0.0236220472440945	9.06939911085738	26.8657970600686	22.3996715591364	23.4153771876572	-0.427661410063138	9.59949611258605	0.011444617884305	0.147169118013011	0.323226602007335	3.02000808595724	0.0212608303984949	0.142190308698667	39.3263512587808	0	22.3996715591364	13.8162386151668	0.0353982300884956	-0.488888888888889	120.163696691132	39.3263512587808	29.2512820512821	102.944206302487
fb_rec20p_per7	7	20	2.85714285714286	FilterBank	7	110	1	2	321	415	82	0	0	0.0498084291187739	0.197590361445783	0	0.108695652173913	0.0217391304347826	0.0393258426966292	8.960903222127	26.6814231153243	20.5261512258816	19.3539411454229	-0.512719046728967	7.18628420408958	0.0024585135591328	0.199058837271641	-0.497096826375501	8.52663798357186	0.00246846909741392	0.135465712141959	34.3728890495578	0	20.5261512258816	11.559250482934	0.053639846743295	65.2637075718016	144.594580050343	34.3728890495578	63.4423076923077	70.1714321660415
fb_rec20p_per7	7	20	2.85714285714286	FilterBank	7	110	1	2	315	394	122	0	0	0.11340206185567	0.309644670050761	0	0.121951219512195	0.161290322580645	0.0457142857142857	10.4474376540051	29.9271370112406	18.4901295853396	21.7931168513332	0.224019702380545	11.6294604633099	5.16713260444093e-05	0.248706087746235	1.07102983375213	15.067348575623	0.00101370866385776	0.152267214294211	31.7558364834088	0	18.4901295853396	13.7141345549866	0.0206185567010309	-16.3323782234957	147.703740488808	31.7558364834088	28.9292114695341	78.753512802191
fb_rec20p_per7	7	20	2.85714285714286	FilterBank	7	110	1	3	309	445	120	0	0	0.0716845878136201	0.269662921348315	0	0.13953488372093	0.128571428571429	0.024390243902439	10.8858034056968	30.0236363539605	18.7076895189727	21.4270326433968	1.53811251374574	12.7204020675264	-0.00773375429705286	0.40977672375932	1.60855200065274	17.7419595378901	0.00496486219748524	0.134680702605837	34.5089483561064	0	18.7076895189727	13.6974478898937	0.0716845878136201	-11.1563275434243	117.160615521025	34.5089483561064	24.3698938453886	66.7790046404585
fb_rec20p_per7	7	20	2.85714285714286	FilterBank	7	110	1	2	358	469	138	0	0	0.0897009966777409	0.294243070362473	0	0.21875	0.169014084507042	0.0362694300518135	11.3068620181603	31.1136014667136	18.7572156459526	22.628220757527	0.225649133182926	14.7435795696517	-0.0127225718616338	0.184356901726694	0.313537778765655	10.0188657633834	-0.012059292791976	0.184581107719153	34.0881542032289	0	18.7572156459526	13.6058166958366	0.0232558139534884	5.71837708830549	132.587740819209	34.0881542032289	40.853740787095	74.0719936297448
fb_rec20p_per7	7	20	2.85714285714286	FilterBank	7	110	1	4	357	576	194	0	0	0.123209169054441	0.336805555555556	0	0.130434782608696	0.1	0.105504587155963	12.2376362374345	32.3710401052486	14.8748822385108	22.3405900659052	0.401871343494523	16.4599587830575	-0.00238620661178415	0.381741490340999	0.500580019842368	18.5135346900566	0.00530996342531591	0.166136307302637	29.6553560987525	0	14.8748822385108	14.7966519762135	0.0429799426934097	25.8718446601942	128.383208153152	29.6553560987525	39.6244897959184	75.5239472677816
fb_rec20p_per7	7	20	2.85714285714286	FilterBank	7	110	1	4	406	711	177	0	0	0.094147582697201	0.248945147679325	0	0.0909090909090909	0.105263157894737	0.0774907749077491	10.3137417311776	30.2716102344491	19.7435998203325	20.988407397454	0.0434710153600426	10.70722324438	0.00141240071027923	0.171491806708637	0.426528539220919	11.9792939054328	0.00566138580909907	0.147181436412214	33.7673231009698	0	19.7435998203325	13.1814954169825	0.0229007633587786	-6.08668730650155	104.468734579624	33.7673231009698	11.1368421052632	72.8715871182774
fb_rec20p_per7	7	20	2.85714285714286	FilterBank	7	110	1	3	403	607	130	0	0	0.0652173913043478	0.214168039538715	0	0.131578947368421	0.0806451612903226	0.0488721804511278	8.76849996923505	24.3880856236212	22.6611595730656	20.1873340046865	0.0369155195099043	8.53530573622345	0.00226018200131858	0.155898351761236	0.546091955621674	17.2892734306342	0.00430830162494945	0.158574475190846	35.8750919329613	0	22.6611595730656	9.74317592580439	0.0190217391304348	5.81555153707053	118.360426472757	35.8750919329613	30.6240196078431	74.3591652868054
fb_rec20p_per7	7	20	2.85714285714286	FilterBank	7	110	1	2	203	382	216	0	0	0.230769230769231	0.565445026178011	0	0.26	0.192307692307692	0.0769230769230769	13.3106438739566	36.2941891698561	4.49771693654471	21.8554685929384	-1.09410273548011	25.9447752822869	0.0382048723809875	0.689914356048121	0.306817573049347	23.9776635076072	0.0136885559028598	0.245138063794437	22.8965770729861	0	4.49771693654471	18.5424782115064	0.0604395604395604	32.1937716262976	174.159780055128	22.8965770729861	9.64191419141914	117.644017523059
fb_rec20p_per7	7	20	2.85714285714286	FilterBank	7	110	1	2	309	433	131	0	0	0.0896551724137931	0.302540415704388	0	0.295081967213115	0.0975609756097561	0.00520833333333333	12.1244422015225	31.4056927099455	20.8059340581017	23.3489709896597	-0.78019098746741	12.3462467164731	-0.00705053819585371	0.191734153149788	-0.0636429656998346	6.87789908282839	0.00280682951375074	0.130911181363358	38.534398923038	0	20.8059340581017	15.270799502241	0.0310344827586207	-9.96938775510204	156.203287709268	38.534398923038	41.7678571428571	81.1528461180246
fb_rec20p_per7	7	20	2.85714285714286	FilterBank	7	110	1	3	320	582	215	0	0	0.104166666666667	0.369415807560137	0	0.0571428571428571	0.203125	0.0571428571428571	11.7530011628511	31.5639463410175	11.7061853724974	22.8029854358722	0.516168554685971	21.0102748703959	-0.0128595335051076	0.545201942015007	0.531632075689018	23.3488654628887	-0.0089988789656625	0.151448721353875	33.5190137506009	0	11.7061853724974	13.8907108766512	0.0486111111111111	37.8985801217039	134.532606506478	33.5190137506009	49.5409415379055	85.2697620134197
fb_rec20p_per7	7	20	2.85714285714286	FilterBank	7	110	1	3	292	448	182	0	0	0.0980392156862745	0.40625	0	0.176470588235294	0.130434782608696	0.05	13.2440205901029	34.744749620518	12.7837899595814	25.0617113014642	0.74815751400378	23.2621189194067	0.039384931960725	0.598316428939615	0.545935211441474	20.368368212562	0.0140644701662598	0.206622330102222	34.4117216229387	0	12.7837899595814	14.958711601927	0.0862745098039216	26.989898989899	144.180301675999	34.4117216229387	69.5048188767032	56.6718681029887
fb_rec20p_per7	7	20	2.85714285714286	FilterBank	7	110	1	1	348	373	100	0	0	0.0811688311688312	0.268096514745308	0	0.1	0.145454545454545	0.0393258426966292	10.7468020260445	31.8757510043608	20.6387753186729	24.2568263655014	0.125416820170618	14.9107950578759	-0.0244692037483066	0.292865123585041	1.04650861922312	17.7965855856084	-0.0235062866075252	0.199552490600892	33.9477686678607	0	20.6387753186729	12.2189312038324	0.0324675324675325	57.2098765432099	108.431966777237	33.9477686678607	62.1802469135802	70.2250994297119
fb_rec20p_per7	7	20	2.85714285714286	FilterBank	7	110	1	3	422	736	214	0	0	0.0721153846153846	0.290760869565217	0	0.260869565217391	0.0694444444444444	0.04	14.1133368517181	35.2624460088726	18.3986127881956	23.0195171224509	0.609613309568187	16.0204559522228	0.0133536578081063	0.500562892918993	-2.26787665882312	18.086570259179	0.00605844016649876	0.145898339882628	35.9181472688754	0	18.3986127881956	13.7883550577597	0.0360576923076923	36.9617151607963	121.774129913016	35.9181472688754	64.9783120963519	71.1854988727001
fb_rec20p_per7	7	20	2.85714285714286	FilterBank	7	110	1	3	444	637	194	0	0	0.138248847926267	0.304552590266876	0	0.361702127659574	0.0689655172413793	0.0796178343949045	13.7135651222214	35.7023174717936	18.423620622	23.1856810553573	-0.328395302743537	15.3985484360536	0.0181428733162357	0.351254608951156	-0.346716472609479	22.1551146593878	0.000642226917020814	0.281107998565378	31.6622071377608	0	18.423620622	14.9684021016905	0.0184331797235023	8.33103448275862	132.754532406903	31.6622071377608	43.2855714285714	76.476609148204
fb_rec20p_per8	7	20	2.85714285714286	JAR_FilterBank	7	110	1	1	475	762	173	0	0	0.0761099365750529	0.227034120734908	0	0.232558139534884	0.135593220338983	0.0443213296398892	10.9006658419017	30.336186293689	18.186616597206	18.6432225388678	-0.159655503605594	10.1231398718553	0.00628957694614531	0.156615340881502	0.00496298259415964	10.6230784145079	-0.00603312216826736	0.143247619320648	30.3248001931441	0	18.186616597206	11.1362630296578	0.0169133192389006	33.5197740112994	102.316124948905	30.3248001931441	48.5348454575727	58.9934378366293
fb_rec20p_per8	7	20	2.85714285714286	JAR_FilterBank	7	110	1	3	294	448	117	0	0	0.10546875	0.261160714285714	0	0.121951219512195	0.145161290322581	0.0746268656716418	10.3275216399974	30.1211156268701	16.1923194062148	20.8600507881088	0.580449037762687	15.653744881443	-0.00554406223018374	0.431165685522051	1.34547200768708	20.035267073628	0.0102642316563949	0.295143192313596	29.8387200880172	0	16.1923194062148	13.3982546709282	0.03515625	9.09	100.493678151269	29.8387200880172	34.2181190139739	94.615180370814
fb_rec20p_per8	7	20	2.85714285714286	JAR_FilterBank	7	110	1	4	390	601	223	0	0	0.183139534883721	0.371048252911814	0	0.264705882352941	0.185714285714286	0.11	11.6144224061601	32.4495337148834	11.4482291219909	23.4382021819432	0.708091334044846	18.0362387506942	0.00158939018964228	0.518311293574132	-0.993158943784558	23.4981528920451	-0.0233928253070959	0.295017607585173	27.6226668170446	0	11.4482291219909	14.406691316422	0.0377906976744186	19.5983935742972	103.307550826531	27.6226668170446	33.2389874468306	66.3295835612074
fb_rec20p_per8	7	20	2.85714285714286	JAR_FilterBank	7	110	1	4	454	602	168	0	0	0.105263157894737	0.27906976744186	0	0.130434782608696	0.0638297872340425	0.090625	11.4989855550463	32.4793288303638	18.2847754251796	21.9085974813434	1.02331938564245	13.1213692905005	0.0103202001305477	0.305313836745603	0.199549823950145	19.7180965666592	0.00113360624776277	0.152668348771775	29.9545741595075	0	18.2847754251796	12.5605672359024	0.0191387559808612	11.8148148148148	106.96471321365	29.9545741595075	23.7416430594901	74.329942383892
fb_rec20p_per8	7	20	2.85714285714286	JAR_FilterBank	7	110	1	2	358	375	118	0	0	0.0655172413793104	0.314666666666667	0	0.0697674418604651	0.105263157894737	0.0404624277456647	9.73898383573223	28.4112231384896	18.6203936920726	22.5197427098758	0.259882716208578	17.0615838962785	-0.00510245415221619	0.165638565489037	-0.553024851719541	10.8936397111114	-0.0122643636047336	0.134834722048362	34.5487944923889	0	18.6203936920726	13.2749490729395	0.0275862068965517	20.9878048780488	113.985673642692	34.5487944923889	38.08	51.486384988616
fb_rec20p_per8	7	20	2.85714285714286	JAR_FilterBank	7	110	1	1	345	652	199	0	0	0.0705882352941176	0.30521472392638	0	0.0576923076923077	0.0895522388059701	0.0378378378378378	11.8898548665515	32.1567731678518	12.9640388674801	21.5129851980225	-0.457703757988536	16.8244476338198	0.0083601985997597	0.393905021338516	0.173784657707028	7.16574849812478	-0.0204626138666687	0.156964761586167	33.3790049374584	0	12.9640388674801	13.4077528647784	0.0647058823529412	38.0972222222222	125.565285673165	33.3790049374584	52.4701754385965	81.2288223079553
fb_rec20p_per8	7	20	2.85714285714286	JAR_FilterBank	7	110	1	1	297	456	134	0	0	0.0598290598290598	0.293859649122807	0	0.0666666666666667	0.102040816326531	0.0462962962962963	11.4108731724639	32.7482840237672	16.7253226057397	22.3696797693241	-0.111490851543734	15.3040032435507	-0.00794147312752265	0.324583453699184	1.70151535976945	24.51859976503	-0.00143773049107636	0.136301475056459	37.2626337584169	0	16.7253226057397	16.8856886111074	0.106837606837607	10.3940886699507	129.093410010658	37.2626337584169	27.2373027259684	78.9401407593132
fb_rec20p_per8	7	20	2.85714285714286	JAR_FilterBank	7	110	1	1	278	302	95	0	0	0.0702702702702703	0.314569536423841	0	0.0416666666666667	0.0303030303030303	0.0917431192660551	11.3229980331265	31.3236263832034	16.2931103701641	20.7783146330411	1.58214019596436	14.1950040680049	0.0129599168097819	0.155172385599413	0.982624734637999	11.2319413565453	0.0121838131257256	0.145690766625718	32.1839086061072	0	16.2931103701641	16.1004591733285	0.0432432432432432	19.4609929078014	140.806599536499	32.1839086061072	23.8412698412698	91.3464099085159
fb_rec20p_per8	7	20	2.85714285714286	JAR_FilterBank	7	110	1	2	291	374	111	0	0	0.0752212389380531	0.296791443850267	0	0.157894736842105	0.0461538461538462	0.0569105691056911	10.7141891060933	30.5389165229384	17.2791165436277	21.0360500407024	-0.543548938055558	9.50057559745805	0.0106745450163258	0.217165371224999	-0.186489896432445	6.11261429272129	0.00736279560469703	0.154531820018814	32.1032905591559	0	17.2791165436277	14.3706776383173	0.0442477876106195	25.2492492492492	133.525236912379	32.1032905591559	26.6918238993711	45.206691238447
fb_rec20p_per8	7	20	2.85714285714286	JAR_FilterBank	7	110	1	4	379	553	92	0	0	0.0662650602409639	0.166365280289331	0	0.146341463414634	0.0384615384615385	0.0371900826446281	9.89496820007588	29.1705858321659	22.8533947615196	20.7682832150816	-0.221047348084095	7.82753014778028	-0.0081175507212337	0.221048177635278	-1.35123816663812	15.1020280281486	0.0027269511442928	0.151352563268106	38.664920387168	0	22.8533947615196	12.1356586975722	0.00602409638554217	43.1500974658869	108.629220308687	38.664920387168	51.3061224489796	69.3676308449032
fb_rec20p_per8	7	20	2.85714285714286	JAR_FilterBank	7	110	1	4	302	484	130	0	0	0.0519031141868512	0.268595041322314	0	0.0588235294117647	0.118421052631579	0.0174418604651163	11.9771108488171	31.2184280915837	19.9501271685019	23.9997840495551	0.528921052785249	12.538825917973	0.0121399360766172	0.339699549956572	-0.0314780734423837	13.7115768975933	0.00637450520778446	0.139187872643632	38.2178631624459	0	19.9501271685019	14.7543789732407	0.0484429065743945	4.61176470588235	144.34328301598	38.2178631624459	45.2595109462883	83.7215636742295
fb_rec20p_per8	7	20	2.85714285714286	JAR_FilterBank	7	110	1	2	385	400	68	0	0	0.0557184750733138	0.17	0	0.08	0.140350877192982	0.0347826086956522	8.03551237805048	24.5011832241848	23.0571404463603	19.2650439958868	-0.129824347488722	7.77047273274828	-0.0103755440800268	0.189950121198113	-0.958657856742257	8.45982056985906	0.000510805743030369	0.154775777119148	30.8845286295833	0	23.0571404463603	8.69082248904588	0.0351906158357771	44.6914893617021	93.836456494136	30.8845286295833	48.7646741882245	62.6507361623449
fb_rec20p_per8	7	20	2.85714285714286	JAR_FilterBank	7	110	1	0	262	375	110	0	0	0.113122171945701	0.293333333333333	0	0.11864406779661	0.0638297872340425	0.115702479338843	10.0428696069857	28.4935751050776	11.3459494986709	16.9149641626736	-1.32454296062683	16.3952717837483	0.0207318455596362	0.398097043493622	1.4339309116554	15.5320466805437	0.0125689382599393	0.152078286822012	22.5557821523756	0	11.3459494986709	14.4477312594358	0.0497737556561086	43.7032640949555	131.725751432681	22.5557821523756	56.4366890380313	88.0325054067114
fb_rec20p_per8	7	20	2.85714285714286	JAR_FilterBank	7	110	1	3	428	554	162	0	0	0.119047619047619	0.292418772563177	0	0.304347826086957	0.22972972972973	0.0606060606060606	11.4315992258017	31.7913696595973	17.2851136529924	21.2046338449154	-1.39324135699368	17.6458256717894	-0.00290061021727342	0.509193019651598	0.159091515353007	19.5482518605459	0.00612095339460104	0.16437404427488	26.8292540568307	0	17.2851136529924	13.2059584443146	0.0214285714285714	39.8947368421053	114.284532699896	26.8292540568307	56.3299895125194	72.1582575803315
fb_rec20p_per8	7	20	2.85714285714286	JAR_FilterBank	7	110	1	6	391	558	113	0	0	0.0395136778115502	0.202508960573477	0	0.151515151515152	0.0806451612903226	0.00851063829787234	8.86224976683453	26.7170683603153	24.6725878580435	21.4785896037282	0.124678132636239	10.3482365418885	0.0075408729483451	0.182448306203579	1.14650247171966	19.280803719169	-0.00463604732525722	0.121008836810124	40.5759066534463	0	24.6725878580435	10.0932152197629	0.0243161094224924	18.9418386491557	120.329584961114	40.5759066534463	37.6413793103448	62.4084853451323
fb_rec20p_per8	7	20	2.85714285714286	JAR_FilterBank	7	110	1	1	321	409	158	0	0	0.139622641509434	0.386308068459658	0	0.133333333333333	0.173333333333333	0.104477611940299	9.9887431774928	28.5920413612645	13.7113759844636	20.9051794912122	-0.0763921338733717	15.5686842288621	0.00408747622145388	0.215806535744224	-0.67436146518525	16.0756149231257	-0.0166851654065333	0.171695902101969	26.0565273156593	0	13.7113759844636	13.1540068925525	0.0264150943396226	-3.07692307692308	141.791170053161	26.0565273156593	19.44187054132	96.3129496806285
fb_rec20p_per8	7	20	2.85714285714286	JAR_FilterBank	7	110	1	3	357	438	103	0	0	0.0666666666666667	0.235159817351598	0	0.103448275862069	0.06	0.0645161290322581	8.88175552154865	26.6816331467201	17.9469742788018	20.7486719140974	-1.76767110195206	12.3614206715506	0.00124776958377269	0.184761583452234	-0.445198270870379	13.1982891569979	0.010522019958094	0.124241380081345	30.7079351876091	0	17.9469742788018	10.8388379474504	0.0259259259259259	25.5522388059701	99.7540042007213	30.7079351876091	38.3904761904762	59.6388481699493
fb_rec20p_per8	7	20	2.85714285714286	JAR_FilterBank	7	110	1	3	411	515	90	0	0	0.0646766169154229	0.174757281553398	0	0.0980392156862745	0.0434782608695652	0.0643939393939394	9.2805416658566	27.3393394579158	21.2477534178956	19.445222491486	0.163047372294435	8.84769658737831	-0.00125679543780577	0.163513536469475	0.648777917596508	12.8034256517873	-2.77286629276457e-05	0.146474411418222	29.2810299361592	0	21.2477534178956	12.6933943883367	0.0323383084577114	25.6605316973415	104.791553910744	29.2810299361592	33.4578525641026	59.5974011135506
fb_rec20p_per8	7	20	2.85714285714286	JAR_FilterBank	7	110	1	2	326	369	76	0	0	0.075812274368231	0.205962059620596	0	0.0930232558139535	0.128205128205128	0.0393258426966292	10.3440440325442	29.5513221131176	22.2288974470659	19.5741473146245	0.0937489527643384	8.13458535041744	-0.00982384548080489	0.177293370986887	-1.57582986028614	19.1968745077537	-0.000680957643932019	0.157492413387357	32.6897506436354	0	22.2288974470659	13.5138180832485	0.0216606498194946	51.8475073313783	134.767512999034	32.6897506436354	40.7496981891348	83.3239783199764
fb_rec20p_per8	7	20	2.85714285714286	JAR_FilterBank	7	110	1	1	297	552	150	0	0	0.105072463768116	0.271739130434783	0	0.104166666666667	0.0769230769230769	0.124223602484472	9.03747765294404	25.8766740307565	15.9833463400105	20.1075454588811	-0.256965031119744	13.6826785945653	0.0204104349016915	0.271429228528672	0.788698604833915	18.1262160204247	-0.00368510817271797	0.158011870094812	30.0641875848501	0	15.9833463400105	12.2880002705464	0.0471014492753623	-8.53386454183267	128.927534802094	30.0641875848501	23.4016754850088	89.1944485046319
fb_rec20p_per8	7	20	2.85714285714286	JAR_FilterBank	7	110	1	2	409	619	179	0	0	0.0969387755102041	0.289176090468498	0	0.152173913043478	0.0222222222222222	0.0925925925925926	9.24402785384361	26.9639589918426	17.5800936156596	21.76708202794	-0.149929485786365	14.4191633837885	0.0108590856247483	0.288982706097308	0.759224065076395	14.5176794246723	0.022633819077205	0.227717067552628	31.4575569322152	0	17.5800936156596	12.1101128901648	0.0178571428571429	30.5573770491803	107.626902202837	31.4575569322152	38.1312302839117	67.7194861178369
fb_rec20p_per8	7	20	2.85714285714286	JAR_FilterBank	7	110	1	2	343	511	152	0	0	0.107142857142857	0.297455968688845	0	0.228070175438596	0.155172413793103	0.0591133004926108	11.6329879623675	32.7872461980276	18.9474629565891	22.3500742494212	0.544008773443826	12.964396183855	-0.0190350925640293	0.393550672148092	-0.275847665905236	17.3518832978808	-0.00882754823199028	0.142728133421545	33.3174892455291	0	18.9474629565891	14.8727405058455	0.0208333333333333	27.4816414686825	146.907895829462	33.3174892455291	49.183395291202	101.039710787841
fb_rec20p_per8	7	20	2.85714285714286	JAR_FilterBank	7	110	1	1	234	413	154	0	0	0.157894736842105	0.372881355932203	0	0.230769230769231	0.217391304347826	0.0125	10.8546516392181	30.7190006372199	14.0575707504507	21.0473254672306	-0.419849977485135	14.9019963794632	0.0294455279209287	0.457241303815356	-0.0343354593030142	7.07636710656028	0.0249176625239167	0.182635197192347	31.3760280014069	0	14.0575707504507	15.5169656247349	0.0717703349282297	22.6175637393768	142.871499113086	31.3760280014069	19.6312611198326	98.9173408323636
fb_rec20p_per8	7	20	2.85714285714286	JAR_FilterBank	7	110	1	4	433	556	104	0	0	0.0824175824175824	0.18705035971223	0	0.310344827586207	0.111111111111111	0.0452830188679245	8.17850316785803	25.1432851720832	19.9644441665971	19.8371072983938	0.245965048857937	9.63460986864961	-0.0091687010073177	0.180028853844661	-0.588635774817296	17.159672875086	-0.00104335051905114	0.15804894489204	31.0541409219968	0	19.9644441665971	10.0873383250467	0.010989010989011	20.7953216374269	88.1776827098002	31.0541409219968	41.7266786840919	58.5605169258402
fb_rec20p_per8	7	20	2.85714285714286	JAR_FilterBank	7	110	1	4	428	520	112	0	0	0.0549132947976879	0.215384615384615	0	0.12	0.0363636363636364	0.0423076923076923	8.04883911856644	24.8901747926924	22.667012604291	22.4356870342153	0.1776076685796	11.2569530449978	-0.00364130888863353	0.282454849082348	0.139434724383618	6.07458237571915	-0.000877265907780915	0.196891631156711	37.0896385518971	0	22.667012604291	10.0099489185779	0.0173410404624277	33.5116772823779	84.3721705375851	37.0896385518971	47.8104395604396	57.5081015835367
fb_rec20p_per8	7	20	2.85714285714286	JAR_FilterBank	7	110	1	1	300	251	65	0	0	0.0518134715025907	0.258964143426295	0	0.0714285714285714	0.0526315789473684	0.0272727272727273	6.82240460056549	21.462124560563	20.3754126658761	21.4616514402265	0.129732037042324	11.4664905898694	-0.00185140555026526	0.149701277505241	-0.0355366180510073	2.84401953128824	0.00553218396679804	0.135292822626265	34.503452828937	0	20.3754126658761	10.3673885653455	0.0155440414507772	65.3859649122807	127.03147542749	34.503452828937	86.077519379845	82.7104902282562
fb_rec20p_per8	7	20	2.85714285714286	JAR_FilterBank	7	110	1	3	373	545	118	0	0	0.0459770114942529	0.21651376146789	0	0.177777777777778	0.02	0.0227272727272727	8.82409073767269	27.0458321294104	21.8639218089278	21.7479444498774	0.81561495885418	9.87650171784667	-0.01529001723433	0.457803455985052	0.0485909863051518	2.1608795807104	0.00138092468298048	0.14789986637648	37.3922691630566	0	21.8639218089278	11.9775413885992	0.0201149425287356	25.6817288801572	102.799863277722	37.3922691630566	48.7677655677656	61.8869663514066
fb_rec20p_per8	7	20	2.85714285714286	JAR_FilterBank	7	110	1	2	250	401	129	0	0	0.100961538461538	0.321695760598504	0	0.166666666666667	0.0204081632653061	0.104166666666667	9.30791753676439	26.7992657488521	13.9484449656135	20.4313990200959	0.526415468486568	12.0882593756192	-0.0282853414002753	0.320918525214019	-1.5099210628426	9.08582312002197	-0.000468515104373539	0.176751220995755	31.3891298333525	0	13.9484449656135	13.6025468854708	0.0384615384615385	31.3242506811989	129.927012026035	31.3891298333525	42.7424460431655	72.4076633169238
fb_rec20p_per8	7	20	2.85714285714286	JAR_FilterBank	7	110	1	5	493	697	151	0	0	0.0979955456570156	0.216642754662841	0	0.0882352941176471	0.0425531914893617	0.106267029972752	9.66067535719285	26.1577195386237	19.1945146162041	20.2857627157332	-0.32413642581234	11.124021661001	-0.00852211086489965	0.28018850876626	-1.28408219895565	13.6696126369229	0.00583677804085319	0.180070287085004	29.2888151833569	0	19.1945146162041	10.0415408638868	0.0267260579064588	25.2854914196568	83.5463639531798	29.2888151833569	33.3812658227848	60.0314566729127
fb_rec20p_per8	7	20	2.85714285714286	JAR_FilterBank	7	110	1	5	334	465	103	0	0	0.0707692307692308	0.221505376344086	0	0.1	0.0579710144927536	0.0603015075376884	11.2382363910279	32.4915149857555	23.9109489479	21.8089420986837	-0.48659214009896	9.7936942726453	0.00749566093659205	0.187935526531203	0.74988095820605	14.202062692784	0.01500855656718	0.142336729237996	36.8955269185991	0	23.9109489479	15.3506030340752	0.0369230769230769	10.0136674259681	109.029047258556	36.8955269185991	37.9269230769231	71.5151956619935
fb_rec20p_per8	7	20	2.85714285714286	JAR_FilterBank	7	110	1	3	326	551	159	0	0	0.104234527687296	0.288566243194192	0	0.159090909090909	0.15625	0.0333333333333333	11.0885291657184	30.44855528269	17.0604090683119	22.2190740173964	-0.792420084284525	11.8606306502078	0.0320650636158198	0.397855770523428	-0.932564405045518	23.2447561925921	0.0058719409793049	0.176847475480045	33.578275030244	0	17.0604090683119	12.00353965373	0.0390879478827362	25.259842519685	122.67879276732	33.578275030244	43.1147540983607	79.106137663197
fb_rec20p_per8	7	20	2.85714285714286	JAR_FilterBank	7	110	1	3	366	546	157	0	0	0.0935672514619883	0.287545787545788	0	0.177777777777778	0.0819672131147541	0.076555023923445	11.5467886273314	31.2542573058135	19.1718995934629	23.2110649445778	-0.17319620526648	13.7977489342433	0.00380279030147857	0.371004102769396	0.545001765677637	23.7779926447341	0.0196190526795997	0.138256661692916	35.0161928578513	0	19.1718995934629	13.865883570383	0.0233918128654971	3.93429158110883	106.778624667418	35.0161928578513	12.3733258928571	71.9025154349821
fb_rec20p_per8	7	20	2.85714285714286	JAR_FilterBank	7	110	1	4	366	380	111	0	0	0.11070110701107	0.292105263157895	0	0.18	0.111111111111111	0.0858585858585859	10.504570306191	28.9743161478078	16.5280498080397	20.0938492451237	1.21632578109072	14.6738816351637	-0.0036802558355882	0.271593033999166	-1.04796871939091	22.4594787054945	-0.000816286652172957	0.126069835077631	27.3151445339909	0	16.5280498080397	13.7471236499346	0.033210332103321	24.1198910081744	145.960046977415	27.3151445339909	42.9382488479263	84.9413613785722
fb_rec20p_per8	7	20	2.85714285714286	JAR_FilterBank	7	110	1	3	306	436	113	0	0	0.0638297872340425	0.259174311926606	0	0.106382978723404	0.0517241379310345	0.0236686390532544	8.9169893206908	25.761076223636	20.5729562779007	21.572047928502	0.402068507590347	9.69552926547179	-0.00609461730404639	0.191340464000682	0.0324708408432997	2.75660313486788	0.00451400355225322	0.157719359806258	37.0569740922191	0	20.5729562779007	10.944327106893	0.0531914893617021	18.1624365482234	119.102299604782	37.0569740922191	34.0869565217391	62.9388065721867
fb_rec20p_per8	7	20	2.85714285714286	JAR_FilterBank	7	110	1	2	244	400	146	0	0	0.107883817427386	0.365	0	0.246153846153846	0.0454545454545455	0.0727272727272727	11.7445068801001	31.182135284868	14.8782004531386	22.4361303985535	0.641438247338114	19.4549035709154	-0.0236015406909928	0.269733949783495	-1.06596370393936	18.2793831685628	-0.00357783639665683	0.175415475485196	32.183961064083	0	14.8782004531386	15.3676765485704	0.0539419087136929	18.7955801104972	171.853468415535	32.183961064083	19.8729306487696	98.6005065932084
fb_rec20p_per8	7	20	2.85714285714286	JAR_FilterBank	7	110	1	3	351	514	104	0	0	0.0552325581395349	0.202334630350195	0	0.204545454545455	0.0535714285714286	0.0135135135135135	9.82955869979269	29.1247035430367	23.4911826612298	21.5545123878687	-0.0166154393653413	9.55030389401423	-0.0121801503775435	0.180128356160583	0.0882227272917963	6.16166195198672	-0.0143926340806093	0.198822101156211	38.2709702131368	0	23.4911826612298	12.7108906910359	0.0174418604651163	38.8752642706131	100.026030940256	38.2709702131368	55.1002891844997	53.5240346523352
fb_rec20p_per8	7	20	2.85714285714286	JAR_FilterBank	7	110	1	2	418	519	78	0	0	0.0501567398119122	0.15028901734104	0	0	0.236842105263158	0.0289256198347107	7.60162426990856	24.6187085497839	20.7739099853677	19.3697354750648	0.265373893331379	9.91317183140628	0.000451239696236038	0.203808984903412	0.458692058250616	8.00442466326697	0.00569922096120642	0.137829010938015	32.7486674749589	0	20.7739099853677	9.41040885119499	0.00626959247648903	46.2383838383838	65.3828319823369	32.7486674749589	53.7339842411785	53.8793036141102
fb_rec20p_per8	7	20	2.85714285714286	JAR_FilterBank	7	110	1	2	408	472	74	0	0	0.0276243093922652	0.156779661016949	0	0.176470588235294	0.0392156862745098	0	8.71177700867825	26.1435225323794	28.3304891477353	20.5402004062115	0.201223619306314	7.60561942546722	0.0124666832603772	0.162295613432156	-0.086121792817738	1.81770398066124	-2.87023182106401e-05	0.153381437599224	41.4623889956437	0	28.3304891477353	9.17630212329535	0.0441988950276243	42.4601366742597	132.421623691094	41.4623889956437	59.0909090909091	56.6727644716126
fb_rec20p_per8	7	20	2.85714285714286	JAR_FilterBank	7	110	1	3	472	677	146	0	0	0.0879828326180258	0.215657311669129	0	0.222222222222222	0.166666666666667	0.047752808988764	8.61050776071174	24.2902120292334	21.581781716537	21.5033068218107	-0.231193865326038	9.8494430048007	0.00596170618642099	0.284825924130883	0.136501113221995	9.02978085521815	0.00951601647978391	0.332312979000397	33.0944411893721	0	21.581781716537	9.09979160865625	0.0107296137339056	28.1352657004831	96.7337936554212	33.0944411893721	46.8224634492201	58.6391565437299
fb_rec20p_per8	7	20	2.85714285714286	JAR_FilterBank	7	110	1	5	405	657	154	0	0	0.0918367346938776	0.234398782343988	0	0.108108108108108	0.0655737704918033	0.0938628158844765	9.12479335153387	26.3207278435385	18.6926143743054	20.786916452919	-0.420574348082322	9.50192525452328	0.0149014876138069	0.217704702638641	1.48377692742667	22.6842803730315	0.00835449492885881	0.184556885071193	31.4845861694383	0	18.6926143743054	11.0443505856156	0.0127551020408163	3	91.6865740482025	31.4845861694383	20.2895061728395	64.2152823723283
fb_rec20p_per8	7	20	2.85714285714286	JAR_FilterBank	7	110	1	4	350	565	108	0	0	0.0762195121951219	0.191150442477876	0	0.0576923076923077	0.0238095238095238	0.076271186440678	9.49685612208043	27.2969402323713	19.1964413685449	20.0149434946631	-0.237031256163926	8.07485223466285	-0.0282965216905668	0.440414187612919	-0.225877197843991	13.2899049839517	0.00846482483568291	0.133555426102745	32.3515750031594	0	19.1964413685449	12.2452972171713	0.024390243902439	29.6318785578748	102.645061818218	32.3515750031594	34.0592057761733	70.2725746137509
fb_rec20p_per8	7	20	2.85714285714286	JAR_FilterBank	7	110	1	2	209	348	97	0	0	0.0969387755102041	0.278735632183908	0	0.0746268656716418	0.207547169811321	0.0227272727272727	10.158333635355	29.220989079508	18.2370531601855	21.9160745205667	-0.292088168402369	11.374951911898	-0.00110781908300894	0.201968211466048	2.04941749433427	19.8431603413114	-0.0072507352030408	0.102425755388629	35.5214155212042	0	18.2370531601855	13.0059514292015	0.0612244897959184	-24.1625	155.39783659226	35.5214155212042	15.3801315789474	93.1294534044159
fb_rec20p_per8	7	20	2.85714285714286	JAR_FilterBank	7	110	1	2	356	202	35	0	0	0.0853658536585366	0.173267326732673	0	0.130434782608696	0.0344827586206897	0.0720720720720721	7.15957407098468	23.8642442487999	23.9854765495987	20.8293876941568	-0.21821434472684	10.626304928781	0.0141248594920992	0.594930851525029	-2.04283784168222	14.649811394548	0.0406905760327728	0.375472969683919	33.7672171388209	0	23.9854765495987	12.497475639146	0.0426829268292683	47.0588235294118	103.078484372559	33.7672171388209	49.2903846153846	75.3280412739937
fb_rec20p_per8	7	20	2.85714285714286	JAR_FilterBank	7	110	1	2	282	474	135	0	0	0.107913669064748	0.284810126582278	0	0.181818181818182	0.127272727272727	0.0718954248366013	9.81071447826834	30.3006566729666	17.5955639322937	20.1243208186794	0.265347042843522	13.8521219156024	-0.00349644385182477	0.221755222972378	1.55905150436371	19.988741053148	0.00413264903939072	0.135424525255461	31.5086372642926	0	17.5955639322937	13.6227168942702	0.0503597122302158	20.5714285714286	135.702587837374	31.5086372642926	38.0924331577205	76.9047397412054
fb_rec20p_per8	7	20	2.85714285714286	JAR_FilterBank	7	110	1	1	372	695	138	0	0	0.0813008130081301	0.198561151079137	0	0.142857142857143	0.0882352941176471	0.0504201680672269	9.8466258211718	29.7248167369816	20.1721937083632	19.7978431957438	0.159195065757445	7.8491709326664	-0.0038999847212324	0.206010109285675	0.783046632087466	13.7999740834799	0.0157230980422276	0.164782611602441	34.0853763724339	0	20.1721937083632	11.2563650246469	0.013550135501355	33.2006319115324	92.7308573147809	34.0853763724339	44.6671421293938	67.8636645682518
fb_rec20p_per8	7	20	2.85714285714286	JAR_FilterBank	7	110	1	3	360	488	122	0	0	0.118032786885246	0.25	0	0.0810810810810811	0.09375	0.122065727699531	8.97074783633387	26.0264784231263	18.0426437743311	19.2579683773459	0.445555721328439	9.8801670270807	0.000180242172196021	0.189120559308516	0.0733846706556583	15.8395737292127	0.00695013124725401	0.160740982612377	27.2409714765941	0	18.0426437743311	12.0645613102596	0.0360655737704918	37.0350877192983	120.991866392659	27.2409714765941	45.9824	82.2505156185546
fb_rec20p_per8	7	20	2.85714285714286	JAR_FilterBank	7	110	1	4	361	566	132	0	0	0.0517241379310345	0.23321554770318	0	0.0606060606060606	0.0232558139534884	0.0572916666666667	8.35832846147828	25.5973173054331	19.1052359477067	20.2110084161997	0.118665445081078	9.92814819155214	-0.0138484145575689	0.185485160240863	-1.16045115623858	25.9438089709664	-0.0113872895343596	0.159409734859686	35.7128508573392	0	19.1052359477067	10.3450671686604	0.00689655172413793	48.7410207939509	95.5877900454562	35.7128508573392	62.0730593607306	59.4947700673599
fb_rec20p_per8	7	20	2.85714285714286	JAR_FilterBank	7	110	1	4	377	550	154	0	0	0.123028391167192	0.28	0	0.142857142857143	0.193548387096774	0.0658682634730539	10.023438102128	30.66749270807	15.6569613072515	22.333822861874	0.726336889533414	15.4151851838759	-0.00992350956191755	0.448562075543982	-1.03462455962335	17.1932060493345	-0.00371336074544397	0.333010481723099	29.6548001066793	0	15.6569613072515	13.7371855822058	0.028391167192429	18.6915113871636	102.22460255549	29.6548001066793	20.7955071792497	72.6633449115196
fb_rec20p_per8	7	20	2.85714285714286	JAR_FilterBank	7	110	1	4	353	546	165	0	0	0.147826086956522	0.302197802197802	0	0.137254901960784	0.185714285714286	0.137614678899083	9.73804512346685	27.0256593545463	13.065321707833	20.5031547329781	-0.364262545644111	14.9160001465337	-0.0453697306235495	0.538263442798309	-1.05081006717342	21.0763578436197	-0.0189564376123862	0.168175195774218	22.2470993819329	0	13.065321707833	12.5240059475692	0.0144927536231884	24.2166666666667	145.183329980084	22.2470993819329	26.3595667870036	86.5349629254402
fb_rec20p_per8	7	20	2.85714285714286	JAR_FilterBank	7	110	1	0	235	414	162	0	0	0.0956521739130435	0.391304347826087	0	0.202898550724638	0.0425531914893617	0.0512820512820513	12.4451072379685	31.7052114274341	13.2846084052851	18.9230640832818	-0.416637093345919	13.86358172677	0.022285833207022	0.366615651277018	-1.95376077060771	15.7785165277176	0.00110054735682688	0.17274020081788	28.7083609584123	0	13.2846084052851	14.5206910967023	0.0869565217391304	16.5945945945946	162.33911100709	28.7083609584123	32.7261345852895	101.728347208925
fb_rec20p_per8	7	20	2.85714285714286	JAR_FilterBank	7	110	1	5	341	586	194	0	0	0.0845921450151057	0.331058020477816	0	0.119047619047619	0.0941176470588235	0.0695187165775401	13.4544627694921	34.2535993006893	17.0820064373687	23.7323404681084	-0.333261887259775	15.2945114432858	-0.0174720955726125	0.408288151836606	-1.56932435030032	19.5142593485053	0.0145566886212395	0.15175790865244	36.2580338315791	0	17.0820064373687	16.0101465974724	0.0483383685800604	-4.33201581027668	143.763779168054	36.2580338315791	29.3261902808543	86.7277876668692
fb_rec20p_per8	7	20	2.85714285714286	JAR_FilterBank	7	110	1	3	326	559	240	0	0	0.125435540069686	0.429338103756708	0	0.25	0.288135593220339	0.0189873417721519	12.2574210357129	31.706958065227	7.49479105475999	24.0012311009164	0.435606237031391	24.9430886223196	-0.05110366757458	0.88531429379109	0.501069147011745	13.073856410408	0.011243730736279	0.335308250153128	29.2550857338431	0	7.49479105475999	14.9759000506842	0.0418118466898955	21.0829694323144	137.720921366264	29.2550857338431	49.2207166337936	83.6395218817624
fb_rec20p_per8	7	20	2.85714285714286	JAR_FilterBank	7	110	1	0	264	407	181	0	0	0.2	0.444717444717445	0	0.363636363636364	0.270588235294118	0.04	11.8232971537146	30.9842131594906	10.0170180632185	19.5352766862805	-0.522979998115457	19.39785674648	-0.0301035349013803	0.356108987109292	-1.12609474872626	26.7809385741135	-0.0110289055347805	0.150221000865004	24.9993148185786	0	10.0170180632185	12.0480677372088	0.04	-24.8227848101266	135.014097746552	24.9993148185786	4.89833285038153	90.5402807768319
fb_rec20p_per8	7	20	2.85714285714286	JAR_FilterBank	7	110	1	3	382	635	226	0	0	0.10079575596817	0.355905511811024	0	0.170212765957447	0.153846153846154	0.0688259109311741	13.9689539757942	35.2690126392772	16.4563733775154	25.0413788499207	0.538099099040964	16.3123919153386	-0.0315318491457798	0.467692898616853	2.02069422907787	20.2577569888259	-0.000432154396875783	0.229873958860626	35.0180703454196	0	16.4563733775154	15.4734013408966	0.0477453580901857	20.5611510791367	129.865799899502	35.0180703454196	41.0036184210526	70.253710738339
fb_rec20p_per8	7	20	2.85714285714286	JAR_FilterBank	7	110	1	3	356	600	181	0	0	0.0745341614906832	0.301666666666667	0	0.170731707317073	0.0833333333333333	0.0204081632653061	12.0433500955339	30.8558767979253	13.5646339733658	23.5087936440736	2.0114902935844	19.1780975795544	0.00540280308414479	0.549562464406829	0.517251419001151	18.9089433567069	0.00835366950581352	0.178137528134503	33.0514487540723	0	13.5646339733658	12.7230445674492	0.0403726708074534	35.8695652173913	112.199124653226	33.0514487540723	50.8640051931191	63.3677668863249
fb_rec20p_per8	7	20	2.85714285714286	JAR_FilterBank	7	110	1	4	361	478	144	0	0	0.102639296187683	0.301255230125523	0	0.169811320754717	0.0909090909090909	0.0888888888888889	11.6615777860144	31.8784512221373	19.8828425098039	22.5577857044916	0.595413847241045	13.5689086151117	-0.0236458266687137	0.178674084745209	-0.699717377010306	23.9873988731627	-0.0124067762603358	0.13786644701163	31.5339957276441	0	19.8828425098039	13.2120318841358	0.0263929618768328	25.1658767772512	116.072734881877	31.5339957276441	33.353526485221	78.5729239676685
fb_rec20p_per8	7	20	2.85714285714286	JAR_FilterBank	7	110	1	3	480	663	160	0	0	0.126385809312639	0.24132730015083	0	0.147058823529412	0.111111111111111	0.115168539325843	11.552261672272	29.9981888189572	18.3507353732242	19.739870675273	0.787017270069601	11.3607236415241	-0.00139066726236648	0.275412622161575	2.50119691638339	20.3384230919241	-0.0109702410403217	0.153408126185249	26.776154229158	0	18.3507353732242	11.1176448307104	0.0155210643015521	32.2977346278317	96.4286185287279	26.776154229158	43.523304281925	60.4140000438442
fb_rec20p_per8	7	20	2.85714285714286	JAR_FilterBank	7	110	1	4	397	606	133	0	0	0.0971867007672634	0.219471947194719	0	0.159090909090909	0.2	0.0466926070038911	10.3365199607484	30.3625906604396	19.1950328288036	19.8111408533291	0.390971000969079	9.14924870920042	-0.00792493697168339	0.264194380326033	-0.452164902621169	22.0963063460749	0.00146447973082812	0.199219660236726	30.2126774480449	0	19.1950328288036	11.0346903897904	0.0153452685421995	46.5531914893617	98.0361643883755	30.2126774480449	43.6240102171137	62.1673602169168
fb_rec20p_per8	7	20	2.85714285714286	JAR_FilterBank	7	110	1	3	382	517	128	0	0	0.0914454277286136	0.247582205029014	0	0.205882352941176	0.0338983050847458	0.0846774193548387	11.4591720444712	29.3143875883599	20.8992443482148	21.3850188104621	-0.848364922886748	10.3682367799639	0.00053267388711698	0.179986878859251	-0.0518549649223737	9.61230410530555	0.000594267941020886	0.164424689705679	32.0615052119941	0	20.8992443482148	13.0736004648283	0.0147492625368732	13.5913043478261	122.095886862371	32.0615052119941	34.1579505300353	73.5605368881585
fb_rec20p_per8	7	20	2.85714285714286	JAR_FilterBank	7	110	1	2	251	410	188	0	0	0.145833333333333	0.458536585365854	0	0.17910447761194	0.195652173913043	0.121495327102804	12.7600973373948	33.0298292607821	7.77988191242867	22.0052599814955	-0.982004961743391	23.0596322892922	-0.0389386022975804	0.660006265843062	-0.750390511364974	12.5274259779927	0.00073255442724999	0.139577644781258	25.0839219906133	0	7.77988191242867	17.5873756851417	0.0333333333333333	18.2564102564103	158.532168191974	25.0839219906133	29.6215351812367	69.6369429254168
fb_rec20p_per8	7	20	2.85714285714286	JAR_FilterBank	7	110	1	3	321	481	158	0	0	0.0794701986754967	0.328482328482329	0	0.127659574468085	0.103896103896104	0.0558659217877095	13.3674294173626	34.2925694818818	17.3682401116425	24.2418194368487	0.248149882683698	15.4040947681987	0.0253195044624796	0.413986052217644	-1.95018799286509	23.7618784716973	-0.000218901123524478	0.164265687072567	34.6506689555059	0	17.3682401116425	13.8497686052178	0.0463576158940397	15.5024390243902	125.365407206733	34.6506689555059	22.3923093349102	75.5405050734326
fb_rec20p_per8	7	20	2.85714285714286	JAR_FilterBank	7	110	1	2	328	585	208	0	0	0.0953846153846154	0.355555555555556	0	0.192982456140351	0.11864406779661	0.0123456790123457	12.9673893071177	34.2177279548328	12.8355410493685	22.0869691158364	0.877202165324591	17.8300025734336	-0.0301787318760162	0.729064514281863	0.478875584312617	5.81255082631008	-0.0135424475320857	0.149361050812918	31.6290609612675	0	12.8355410493685	15.5177058659612	0.0461538461538462	29.7075098814229	137.742798855546	31.6290609612675	51.0925543190249	81.4038159460508
fb_rec20p_per8	7	20	2.85714285714286	JAR_FilterBank	7	110	1	3	331	505	175	0	0	0.126934984520124	0.346534653465347	0	0.217391304347826	0.15625	0.049079754601227	11.5426303728195	31.1027482748359	18.6091050517625	23.4231326997045	0.515117841762388	16.8741214885721	0.00326014554682603	0.157773632844608	0.140760107887533	10.7082581501734	0.0140689931159578	0.142340531446557	35.7661761700863	0	18.6091050517625	12.1227654333277	0.0402476780185759	12.9177489177489	122.405631227938	35.7661761700863	35.8296513175406	69.1645814711375
fb_rec20p_per9	10	20	2	FilterBank	7	110	1	0	204	334	167	0	0	0.186813186813187	0.5	0	0.189655172413793	0.135593220338983	0.196969696969697	13.3920724670439	33.4640010626544	7.05136348708121	21.1401866669745	0.481952488801449	20.4207910336472	-0.0127313469103689	0.365836442038038	-2.38839529458486	29.7851771531094	-0.0275647623207035	0.446434709247766	21.7824482318596	0	7.05136348708121	17.3495999403751	0.0494505494505494	6.52857142857143	154.165876445851	21.7824482318596	19.6245954692557	76.4136041639247
fb_rec20p_per9	10	20	2	FilterBank	7	110	1	3	364	429	113	0	0	0.109510086455331	0.263403263403263	0	0.163934426229508	0.0789473684210526	0.091254752851711	11.4575219835714	29.346598005265	22.1094962722305	20.8041375154497	0.478921637728356	9.68008383939293	-0.000340123895495712	0.18940741067163	0.650908398773791	15.7111615664835	0.00278812648406424	0.152418278956076	31.8468575225388	0	22.1094962722305	12.0679763119037	0.0259365994236311	33.3145539906103	122.009217103755	31.8468575225388	46.1549815498155	59.2482601955818
fb_rec20p_per9	10	20	2	FilterBank	7	110	1	2	263	301	128	0	0	0.114035087719298	0.425249169435216	0	0.16	0.0588235294117647	0.0731707317073171	13.4069320332126	34.0547402343613	15.8661026578785	24.7996490696899	-0.562717946004857	17.5133098971366	0.00429897132947973	0.242836061592031	-0.0333452781671219	3.43554744454909	0.00546676723459584	0.142195038101773	37.5357776468755	0	15.8661026578785	16.7635620254066	0.0350877192982456	5.51145038167939	131.249834382656	37.5357776468755	26.5804713804714	60.5573210770666
fb_rec20p_per9	10	20	2	FilterBank	7	110	1	2	264	315	115	0	0	0.0718232044198895	0.365079365079365	0	0.0714285714285714	0.125	0.0222222222222222	13.231749108427	32.5177645361192	14.2786650079332	24.8956434641947	-1.71824238125566	24.223525361459	0.0297228959874817	0.501070013812218	-3.72527683078226	19.3693490030068	-0.00660870514491478	0.15164479701193	35.252160870307	0	14.2786650079332	16.2734266628587	0.0662983425414365	9.97037037037037	135.503463829894	35.252160870307	32.86375	78.6921899517063
fb_rec20p_per9	10	20	2	FilterBank	7	110	1	3	285	408	156	0	0	0.0873015873015873	0.382352941176471	0	0.113207547169811	0.08	0.0754716981132075	13.0709452635262	33.6933221768243	15.7718862326748	23.9940222341687	0.433582739929253	19.0468690071546	-0.00236972622182198	0.228392941833519	2.01454120018366	22.4036743289232	0.0233938343906482	0.345446356076343	34.076521557816	0	15.7718862326748	13.9258325071031	0.0634920634920635	28.9405405405405	142.6966829974	34.076521557816	45.5032525133057	42.6399458425787
fb_rec20p_per9	10	20	2	FilterBank	7	110	1	1	323	417	153	0	0	0.13745704467354	0.366906474820144	0	0.162162162162162	0.181818181818182	0.122093023255814	13.5494171983418	32.8239584266835	13.4366685992192	20.5166615322039	-0.539960790041397	16.048232074672	-0.0459741834952878	0.457595904301331	0.239715224864995	19.6617030216619	-0.00617521807639734	0.27365993590244	25.5734436417561	0	13.4366685992192	12.9678757835148	0.0343642611683849	-1.93063583815029	108.662998985764	25.5734436417561	25.6112479474548	95.0141157695245
fb_rec20p_per9	10	20	2	FilterBank	7	110	1	0	187	94	73	0	0	0.166666666666667	0.776595744680851	0	0.15	0.125	NaN	10.5801220978907	29.9301500255111	-3.45212234975598	13.7710954220125	-0.0488653348264115	29.0655461263898	-0.105210533390539	0.505054153171268	-3.36196131762345	9.86919417785389	-0.0668594873141798	0.146298652680985	6.22550984357152	0	-3.45212234975598	16.8222193189467	0.133333333333333	-62.1587301587302	193.867031780199	6.22550984357152	-66.1894736842105	213.640223736924
fb_rec20p_per9	10	20	2	FilterBank	7	110	1	2	249	260	145	0	0	0.126984126984127	0.557692307692308	0	0.121951219512195	0.0465116279069767	0.117647058823529	13.3591752346723	33.7486616620226	8.57472391321124	23.8733868032557	3.42743445231208	26.5901407686794	-0.0189717371980176	0.303653805068618	0.74155633608343	7.12184553508951	0.011732890847807	0.107411322863217	37.7986395792151	0	8.57472391321124	17.5742542697235	0.0555555555555556	1.03783783783784	132.339335223786	37.7986395792151	16.5294117647059	62.2749010528427
fb_rec20p_per9	10	20	2	FilterBank	7	110	1	2	309	294	123	0	0	0.0423728813559322	0.418367346938776	0	0.0238095238095238	0.0222222222222222	0.01	12.6407327843566	33.4072920153067	13.195546097476	26.4580846284199	2.90651226844072	25.834166570203	-0.00512033015726787	0.713046526047505	-1.24989013307984	9.39364464090231	-0.00349725414863445	0.151007153216926	37.9621308931266	0	13.195546097476	15.4952164321582	0.0550847457627119	-9.28506787330317	132.286243370613	37.9621308931266	22.6732815645672	84.9587340393196
fb_rec20p_per9	10	20	2	FilterBank	7	110	1	2	234	236	108	0	0	0.0985915492957746	0.457627118644068	0	0.0294117647058824	0.183673469387755	0.0357142857142857	12.8275970619004	33.2354241076456	12.1477168780515	24.868843615728	0.73183195980952	24.6366636316115	0.0465828519470605	0.578141340626763	-0.242069767998256	14.6115293729985	-0.0251921765859758	0.139897348147252	34.9970521110405	0	12.1477168780515	15.9040893222801	0.0563380281690141	10.6382978723404	119.44621335027	34.9970521110405	31.4857142857143	85.8801120259627
fb_rec20p_per9	10	20	2	FilterBank	7	110	1	5	361	506	129	0	0	0.0898550724637681	0.254940711462451	0	0.347826086956522	0.111111111111111	0.0262008733624454	12.716156568836	30.2551184512317	21.7316947556333	20.6207509241556	0.741132272122832	9.07391380860284	-0.0121671039133313	0.230549062809859	0.309166940427558	4.98760844018601	-0.00064301843684269	0.135824094273316	34.1428175487235	0	21.7316947556333	11.7847656591411	0.0434782608695652	25.7629937629938	132.728866658132	34.1428175487235	46.6848891181021	70.9656809085312
fb_rec20p_per9	10	20	2	FilterBank	7	110	1	2	306	543	273	0	0	0.196551724137931	0.502762430939227	0	0.355932203389831	0.0909090909090909	0.129032258064516	15.3583119895032	35.9370353443421	7.98636249343323	22.2330222959466	-0.577238602667115	24.6205325025244	-0.0286940157137978	0.497975793448297	1.75701426078237	22.2593191488488	0.0248573128540204	0.229677242518305	28.8158843544753	0	7.98636249343323	18.5505650723389	0.0862068965517241	37.4862385321101	169.338923684292	28.8158843544753	32.0752034146992	107.85144324784
fb_rec20p_per9	10	20	2	FilterBank	7	110	1	3	340	329	127	0	0	0.107692307692308	0.386018237082067	0	0.210526315789474	0.214285714285714	0.0212765957446809	11.6922371906803	30.3320783103922	15.1853470930039	27.2530210103944	-0.828387309022953	23.2808428519702	0.0384212356060137	0.686122934868521	-1.18700794051084	17.2451394320113	0.0191746665691792	0.346765740645949	35.0104241271953	0	15.1853470930039	14.3184548365642	0.0384615384615385	14.7985865724382	140.72345396006	35.0104241271953	43.3520057453576	93.8298332347455
fb_rec20p_per9	10	20	2	FilterBank	7	110	1	1	287	485	217	0	0	0.113821138211382	0.447422680412371	0	0.133333333333333	0.0943396226415094	0.111842105263158	14.3238146466719	33.8119776184331	9.66506427760154	21.032386703718	-1.91267290473913	21.9556426991039	0.0176373294098068	0.354694001606499	-1.72590902780018	12.4694997903914	-0.00348967746617521	0.145239094696691	26.1526434723382	0	9.66506427760154	17.2858859243073	0.0447154471544715	28.3259259259259	135.540328456382	26.1526434723382	57.4502923976608	80.5280487300355
fb_rec20p_per9	10	20	2	FilterBank	7	110	1	2	267	307	101	0	0	0.0914285714285714	0.328990228013029	0	0.108108108108108	0.175	0.0449438202247191	10.0686540476697	28.4633530977564	16.6227380569876	20.4304612865655	-0.472361894738907	10.431309632252	0.00171957052604091	0.26151769567406	-1.63239189227525	11.568834877316	0.0228778392252971	0.184622831421131	33.3167376515181	0	16.6227380569876	12.1249003796883	0.08	40.3478260869565	143.439294840528	33.3167376515181	55.7843137254902	75.008556927407
fb_rec20p_per9	10	20	2	FilterBank	7	110	1	2	232	360	173	0	0	0.144927536231884	0.480555555555556	0	0.152173913043478	0.151515151515152	0.118279569892473	12.9186667292946	32.0056541789487	9.98486551110808	24.159114680578	-0.996053740361965	25.1433740496806	0.0292816868530448	0.608827869742756	2.48485155624548	16.0639900790456	0.0213105401959056	0.16847343942473	29.5192765821713	0	9.98486551110808	14.924772030787	0.0579710144927536	-14.9777777777778	106.651743070032	29.5192765821713	13.7746256895193	82.8459652502603
fb_rec20p_per9	10	20	2	FilterBank	7	110	1	2	382	359	182	0	0	0.17479674796748	0.506963788300836	0	0.289473684210526	0.129032258064516	0.0588235294117647	13.4474281369115	33.7005024018547	9.93511665374719	23.7806078168487	3.30594818672672	28.1745610182433	0.0327189508728267	0.642767968858195	-1.47488769866045	14.2921897321259	-3.71992763400418e-05	0.1502118994084	31.6325299726683	0	9.93511665374719	19.2602987024747	0.0569105691056911	-2.95652173913044	144.580892466478	31.6325299726683	40.4352267624607	80.2026990596163
fb_rec20p_per9	10	20	2	FilterBank	7	110	1	3	387	366	103	0	0	0.0898876404494382	0.281420765027322	0	0.137931034482759	0.135135135135135	0.072463768115942	11.932588491918	32.7889439468041	21.9754443598755	23.2482558894859	-1.03138887924175	12.8877685221568	-0.00750712416161751	0.402550242783965	-0.474553932372371	8.93956848083593	0.00598263704106459	0.140349331930705	34.3745976813263	0	21.9754443598755	12.1460155973147	0.0187265917602996	17.1463414634146	130.245416145603	34.3745976813263	42.3444929645803	59.4060098234025
fb_rec20p_per9	10	20	2	FilterBank	7	110	1	4	263	404	156	0	0	0.128	0.386138613861386	0	0.1	0.233766233766234	0.0169491525423729	11.6594991988765	28.5799083376859	15.4421838631596	23.044991407423	0.213498342000636	16.9843766281656	0.0096923955241167	0.228098317370941	1.74437862029206	18.7828958932359	-0.00361682749018904	0.16685641167338	33.5980710893415	0	15.4421838631596	12.8114156629975	0.06	-34.6202898550725	140.050813639474	33.5980710893415	13.2952521837137	104.286636547507
fb_rec20p_per9	10	20	2	FilterBank	7	110	1	2	274	406	149	0	0	0.138461538461538	0.366995073891626	0	0.240740740740741	0.240740740740741	0.0405405405405405	12.7039394029467	30.9272831301965	16.0614447195111	23.2985809319424	0.543820000298687	16.6679404765925	0.00293110591223706	0.376803821684801	0.683603794930103	15.1644748981671	0.0411946092459752	0.432449025219473	31.3482604686921	0	16.0614447195111	13.4278354883926	0.0192307692307692	12.3204747774481	141.889433278043	31.3482604686921	40.8362068965517	93.3907835250476
fb_rec20p_per9	10	20	2	FilterBank	7	110	1	1	197	410	206	0	0	0.187134502923977	0.502439024390244	0	0.16	0.191780821917808	0.193548387096774	14.4586075206169	33.0761371610232	7.54799267624462	20.4936042691081	2.22267859486657	24.7799307553894	-0.0493920033354549	0.528345017569682	2.32037720381498	18.7198080967701	-0.055533871851174	0.461070561100998	24.3925669691047	0	7.54799267624462	15.6065997049659	0.116959064327485	-8.32826747720365	133.310344720465	24.3925669691047	4.55172413793103	96.6473761504171
fb_rec20p_per9	10	20	2	FilterBank	7	110	1	1	264	436	207	0	0	0.115789473684211	0.474770642201835	0	0.105263157894737	0.163265306122449	0.0909090909090909	13.9941343434654	32.7837732060395	10.6264050999508	22.1801865075937	0.705055659787699	22.2728190493121	-0.00839339173102073	0.221792566813003	1.15759993103172	27.8356210699284	-0.014903535309369	0.140046210691228	33.6123037500285	0	10.6264050999508	12.5151086448366	0.0894736842105263	17.0643274853801	142.604641671929	33.6123037500285	41.4602870813397	65.1051327572194
fb_rec20p_per9	10	20	2	FilterBank	7	110	1	1	383	422	124	0	0	0.065015479876161	0.293838862559242	0	0.0909090909090909	0.156862745098039	0.0388349514563107	13.9550812048896	35.0644791292988	22.9640745037991	24.8496035689541	-0.614202154014041	14.2667988154159	0.0454912483364161	0.430641876472979	0.0501553791182196	4.8251975014394	0.00664822156108884	0.134241813208633	40.3076403961634	0	22.9640745037991	13.1048671124629	0.0278637770897833	33.6972972972973	109.620163334479	40.3076403961634	50.020652173913	61.7993112128691
fb_rec20p_per9	10	20	2	FilterBank	7	110	1	2	452	761	276	0	0	0.107865168539326	0.362680683311432	0	0.222222222222222	0.0517241379310345	0.0575539568345324	16.2056176262288	38.0607952921157	14.0753936182726	23.455471676227	-0.11421284866668	20.0670861225878	0.012516815454079	0.350768423544123	-0.372817065727414	19.3181481443328	0.0173063074265989	0.13994895044775	32.8759823599528	0	14.0753936182726	14.2442154235416	0.0292134831460674	38.2995461422088	115.292465323627	32.8759823599528	57.4765432098765	60.6190607949913
fb_rec20p_per9	10	20	2	FilterBank	7	110	1	4	287	284	88	0	0	0.140350877192982	0.309859154929577	0	0.125	0.208333333333333	0.0888888888888889	13.7803675707421	32.9341864532796	18.2105281850425	22.4811701169997	0.832640403471835	10.7885243933293	0.0198679757096669	0.273491021631124	-0.759409551068261	8.75519944698195	-0.00488143459464857	0.182831980103996	28.3675456768464	0	18.2105281850425	14.5071631310338	0.0307017543859649	29.0721649484536	137.419186088758	28.3675456768464	33.1587301587302	88.7263774640483
fb_rec20p_per9	10	20	2	FilterBank	7	110	1	2	381	530	132	0	0	0.0638297872340425	0.249056603773585	0	0.194444444444444	0.0666666666666667	0.0275229357798165	13.2764456594078	32.1348054271634	21.7535653150491	22.0276013081481	0.489973183760112	11.1575476740368	0.0143064257378683	0.315759667577215	-0.672393113990936	5.65535847077554	0.00158107745487164	0.166109346428885	37.9946973633182	0	21.7535653150491	13.5669943837774	0.0303951367781155	13.0821643286573	123.498204393744	37.9946973633182	49.0810810810811	60.9338597238206
fb_rec20p_per9	10	20	2	FilterBank	7	110	1	2	220	457	214	0	0	0.131455399061033	0.468271334792123	0	0.241379310344828	0.0869565217391304	0.0898876404494382	16.0647786187525	36.1802857271209	10.1749749338068	21.5140847505541	0.227537296376784	21.7150768555728	0.00751527054540408	0.231196205353171	-0.268948469463996	12.1529473803787	0.0118349114438543	0.152916045239621	33.3631869012678	0	10.1749749338068	16.561952035856	0.0751173708920188	28.5496183206107	174.552323031288	33.3631869012678	37.4492307692308	103.619458868934
fb_rec20p_per9	10	20	2	FilterBank	7	110	1	4	466	652	235	0	0	0.0895196506550218	0.360429447852761	0	0.166666666666667	0.0606060606060606	0.0394736842105263	17.1131227878541	37.5754459906435	16.712138920802	23.6892508240306	-0.622601705393476	19.0746348732503	0.0342545744330605	0.493497449134959	-0.501239802740017	13.2859631861757	-0.00589308122443022	0.13737996141699	33.6128537007066	0	16.712138920802	13.7666022726563	0.0196506550218341	24.2233856893543	111.314110203851	33.6128537007066	62.6202898550725	62.8249519468581
fb_rec20p_per9	10	20	2	FilterBank	7	110	1	4	347	620	206	0	0	0.0807453416149068	0.332258064516129	0	0.229166666666667	0.0526315789473684	0.0469483568075117	13.8891121766803	33.487128387194	15.8353089402463	22.5926373366154	-0.352127975563809	15.3002924274473	-0.00504800632428155	0.345668636108927	0.328027715772206	5.4068789589913	0.00315668737248825	0.132238186882897	34.3036404433041	0	15.8353089402463	11.548859542562	0.031055900621118	13.6526508226691	108.593218877533	34.3036404433041	39.5481171548117	54.3427960426597
fb_rec20p_per9	10	20	2	FilterBank	7	110	1	2	391	665	189	0	0	0.0557103064066852	0.284210526315789	0	0.0731707317073171	0.130434782608696	0.0434782608695652	12.7479405466228	31.1933447358803	16.5821540846658	22.1716514554637	-0.0624222243198112	18.0785389145893	0.0253956363200002	0.38827830127736	-1.0756495675759	10.6947041840101	0.00717603422107678	0.103532598268502	35.4878604897058	0	16.5821540846658	10.7906108636888	0.0250696378830084	60.0341296928328	91.2393613271987	35.4878604897058	60.6952830188679	49.79990099037
fb_rec20p_per9	10	20	2	FilterBank	7	110	1	1	216	417	176	0	0	0.142857142857143	0.422062350119904	0	0.195652173913043	0.173333333333333	0.0735294117647059	14.0671914131744	33.8530093523097	10.7604317071083	21.0461184206784	-1.29204606227774	17.0925952322227	-0.000627812168681477	0.247858397211085	2.18459534142209	15.4065256305536	-0.0142970425489171	0.271977774221825	29.7383029237875	0	10.7604317071083	15.9796653926542	0.0687830687830688	22.0919540229885	160.269918735557	29.7383029237875	27.9877184453599	89.539508933641
fb_rec20p_per9	10	20	2	FilterBank	7	110	1	2	272	369	172	0	0	0.177339901477833	0.466124661246612	0	0.260869565217391	0.28169014084507	0.1	13.2553252873091	32.2132093477496	10.0304056582279	22.7187251614055	-1.93442238711457	24.809169181951	-0.0117476412380471	0.329470832612303	1.15039718029245	18.4347524517586	0.00987399526682008	0.237074456848135	26.5085203530118	0	10.0304056582279	15.2466447570255	0.0197044334975369	1.91881918819188	123.831100832607	26.5085203530118	23.2498865661967	104.76954039937
fb_rec20p_per9	10	20	2	FilterBank	7	110	1	6	519	878	227	0	0	0.0821917808219178	0.258542141230068	0	0.294117647058824	0.197530864197531	0.0373134328358209	16.3963966557946	37.4354428762142	20.8607818533746	23.1144130837628	0.0633943280703669	12.5526842218849	0.0137895660145278	0.317847710914765	0.185839592564721	14.2929188128767	-0.000915905581032534	0.140690031834047	37.4060477597745	0	20.8607818533746	12.003011978808	0.00391389432485323	38.8367346938776	93.3626329355595	37.4060477597745	55.5399741063534	65.3751099250427
fb_rec20p_per9	10	20	2	FilterBank	7	110	1	3	284	442	186	0	0	0.172131147540984	0.420814479638009	0	0.244444444444444	0.194029850746269	0.132352941176471	13.115124262715	31.6025031271134	12.9150468392155	22.6066969489156	-0.481314575011392	17.0059380749558	-0.0317327801769132	0.336317855118681	3.35348226216966	21.804665646914	-0.00798457932350996	0.367816433312547	26.7259941446617	0	12.9150468392155	15.6676134576059	0.0245901639344262	-8.16483516483516	140.093378047287	26.7259941446617	30.5665061346176	86.3065663995289
fb_rec20p_per9	10	20	2	FilterBank	7	110	1	2	359	483	144	0	0	0.10223642172524	0.298136645962733	0	0.224489795918367	0.0769230769230769	0.0714285714285714	13.2310323412689	33.7130708573126	16.6283253615391	24.3396825935156	-0.731297522102057	18.6674947110408	-0.0168955778410574	0.486389114659255	-0.261540445658073	21.4094490844899	0.00112195680370678	0.157633573241471	33.320128141173	0	16.6283253615391	13.3648425563165	0.060702875399361	47.4447058823529	123.921887967482	33.320128141173	49.5103734439834	51.1561785151767
fb_rec20p_per9	10	20	2	FilterBank	7	110	1	0	212	217	99	0	0	0.0948275862068965	0.456221198156682	0	0.102564102564103	0.21875	0	9.36592326149267	25.863881987693	9.95368107483765	22.9502758899144	-2.34086922957321	23.9406283781612	-0.0348057126800841	0.256097315824178	-3.11176793704331	13.6146307904963	-0.012280051556846	0.180301644430302	32.6284121208238	0	9.95368107483765	14.2532147186615	0.0862068965517241	-3.03825136612022	152.443373241598	32.6284121208238	30.9714767156863	99.1088035347009
fb_rec20p_per9	10	20	2	FilterBank	7	110	1	3	324	427	155	0	0	0.0748031496062992	0.362997658079625	0	0.121212121212121	0.0769230769230769	0.0206896551724138	11.9691350825828	29.7002858847631	17.1693997210206	23.532585865698	-0.357434086280288	17.2761245935967	0.0264605464663767	0.452810926829718	-0.800652028529899	10.667395752181	-0.00675622526780021	0.14542077225194	38.0011648214272	0	17.1693997210206	13.7766520519817	0.062992125984252	33.4477211796247	144.847883042672	38.0011648214272	32.1912739965096	69.9457720992999
fb_rec20p_per9	10	20	2	FilterBank	7	110	1	2	312	392	136	0	0	0.0790697674418605	0.346938775510204	0	0.111111111111111	0.1	0.0575539568345324	12.7921017673327	33.8229547848242	15.3683674284381	24.8507714330677	0.613311799307594	18.0617266781633	0.0427939899493616	0.510314018490171	1.13197501539959	11.2573596161684	0.0109115965700796	0.141200937406652	37.4140689517727	0	15.3683674284381	16.7140363370726	0.0418604651162791	33.68	94.1856387984597	37.4140689517727	43.3536526366715	48.1006135356654
fb_rec20p_per9	10	20	2	FilterBank	7	110	1	0	267	459	202	0	0	0.2	0.440087145969499	0	0.326530612244898	0.267441860465116	0.0984848484848485	14.368305413995	32.6908351161047	10.0933470244151	20.3003462162727	-2.02363653866697	20.2912290765905	-0.0224887591440608	0.403272964963829	-2.34592238735104	19.458779089199	0.0118807854880767	0.135940335589164	24.1570038608126	0	10.0933470244151	14.173038319217	0.0461538461538462	3.93424657534247	146.48675466056	24.1570038608126	42.2989519206797	97.328371801445
fb_rec20p_per9	10	20	2	FilterBank	7	110	1	3	236	370	144	0	0	0.0925925925925926	0.389189189189189	0	0.18	0.0588235294117647	0.0470588235294118	13.0709991583315	31.7810384199173	14.246073007783	24.1850149080207	-0.0744213302829575	15.8583248066919	0.0278993393501061	0.627467203787492	0.368705955819092	9.34923027521041	-0.00236940568108144	0.14788514903841	37.5509191973289	0	14.246073007783	15.1519328372292	0.0740740740740741	-39.6953642384106	172.552038214736	37.5509191973289	4.34825870646766	80.657768577278
fb_rec20p_per9	10	20	2	FilterBank	7	110	1	1	220	394	247	0	0	0.26219512195122	0.626903553299492	0	0.318181818181818	0.269230769230769	0.0810810810810811	13.8411872459147	34.4868687158394	1.4819957029685	19.8602373386825	-1.66748476679619	33.874916444409	-0.0164179463196242	0.646343350892487	4.30026089561505	57.115107258112	0.0258677017940058	0.146109702753957	20.9004163618893	0	1.4819957029685	16.0975416819616	0.140243902439024	-8.8140350877193	165.00963633683	20.9004163618893	18.0107212475634	121.951867192747
fb_rec20p_per9	10	20	2	FilterBank	7	110	1	0	189	307	148	0	0	0.152439024390244	0.482084690553746	0	0.208333333333333	0.0425531914893617	0.0344827586206897	14.7802193097518	35.2242109035079	7.35143175316411	20.4854596634651	-3.87030338634042	24.8589652958993	-0.0278098150635886	0.326564956706581	-1.77176785809538	19.195281783023	0.010843332590645	0.139717857724065	29.5608516981644	0	7.35143175316411	17.2688620442528	0.0609756097560976	5.22222222222222	191.19154867551	29.5608516981644	2.89230769230769	61.2760462673127
fb_rec20p_per9	10	20	2	FilterBank	7	110	1	0	248	372	156	0	0	0.145161290322581	0.419354838709677	0	0.195121951219512	0.137254901960784	0.103448275862069	13.1932019672077	34.1590495821647	10.3499106714004	19.3211347796559	-0.648017090848496	14.1573189936792	-0.0351984595591475	0.36467423398687	-0.189662461920103	20.6728625955146	-0.0298370332418875	0.179367714461808	25.2905929939319	0	10.3499106714004	16.4301755594564	0.0537634408602151	42.3612903225806	142.848501180768	25.2905929939319	56.9719626168224	73.4381343979246
fb_rec20p_per9	10	20	2	FilterBank	7	110	1	3	321	411	144	0	0	0.15034965034965	0.35036496350365	0	0.290909090909091	0.145833333333333	0.0662251655629139	12.8140957124971	30.3088110288245	18.3775100984884	22.2072797615106	0.743158249890422	16.8061962110003	-0.00502982496898654	0.321559403294713	-0.715327980788805	21.3104961686313	0.0101738838625406	0.16779269121604	33.0353333904865	0	18.3775100984884	12.0785285269193	0.0314685314685315	-3.91011235955056	152.731497102959	33.0353333904865	38.3023361159645	91.368140483552
fb_rec20p_per9	10	20	2	FilterBank	7	110	1	2	330	604	215	0	0	0.0949367088607595	0.355960264900662	0	0.25	0.114285714285714	0.0338983050847458	16.867061516498	39.6788268705273	15.9720888777886	22.7917973566155	0.34212733981048	15.9923511590747	0.00515454673026241	0.521243505190828	-0.602436911871182	8.54912937726299	0.0310236621808354	0.399851199506154	36.8700268777378	0	15.9720888777886	17.1416831582175	0.0379746835443038	2.86792452830189	129.775673507201	36.8700268777378	37.6123551011592	79.4574947479027
fb_rec20p_per9	10	20	2	FilterBank	7	110	1	2	298	445	171	0	0	0.140221402214022	0.384269662921348	0	0.317073170731707	0.125	0.0838709677419355	15.0344718864166	35.7649925185084	15.3071653529198	23.4268693755448	-1.23178468808854	16.2835512980338	0.0293125358522165	0.535913893551623	0.0748589096046372	11.0212039860672	-0.00194247209312347	0.143969659250372	31.380329083037	0	15.3071653529198	16.4180027760468	0.03690036900369	-4.83870967741936	130.675152491413	31.380329083037	20.5171270718232	92.8559863715516
fb_rec20p_per9	10	20	2	FilterBank	7	110	1	1	245	437	192	0	0	0.18942731277533	0.439359267734554	0	0.245901639344262	0.294117647058824	0.0707070707070707	16.7349164807574	38.3969253354257	11.5026670561215	23.4080321316144	1.41823063195428	22.1619479709971	-0.00187079457307006	0.594825057432539	1.89587398498949	11.6265950404609	-0.00657318571200808	0.247146297461787	30.4556401141316	0	11.5026670561215	19.253861732047	0.026431718061674	36.6	143.160326751767	30.4556401141316	61.2703296703297	88.410403491187
fb_rec20p_per9	10	20	2	FilterBank	7	110	1	1	274	429	179	0	0	0.141263940520446	0.417249417249417	0	0.327272727272727	0.146341463414634	0.0476190476190476	14.2102121212991	34.5089290113208	14.0141470715282	21.8986031979573	-1.05705255621385	18.3506259533931	-0.0178852057286661	0.321644533949974	-0.402255357300023	5.54909971818788	-0.0187306590409975	0.203810030798687	34.428499402178	0	14.0141470715282	15.6471947692533	0.0371747211895911	-25.0928961748634	155.3858903128	34.428499402178	24.8529411764706	91.3962905002787
fb_rec20p_per9	10	20	2	FilterBank	7	110	1	2	289	468	220	0	0	0.186770428015564	0.47008547008547	0	0.232558139534884	0.241935483870968	0.0973451327433628	14.3288589468645	34.405964908507	9.96883181750677	24.72703000569	0.780289296777902	25.1300677070688	-0.0470394821161062	0.601923268771278	-2.30732380841508	23.9207688975013	0.0035746768143224	0.146258128621337	31.0076440565277	0	9.96883181750677	17.3122437792182	0.0389105058365759	-15.4005449591281	128.705833529027	31.0076440565277	1.54874727668845	80.6301807513946
fb_rec20p_per9	10	20	2	FilterBank	7	110	1	3	305	485	222	0	0	0.18978102189781	0.457731958762887	0	0.191489361702128	0.280487804878049	0.10077519379845	17.0567666031649	41.386627259765	11.0951280548912	26.2956125528991	1.46613833734035	24.1727471252426	-0.0158751643083307	0.704285056056964	-1.14744493196744	22.6051182482089	0.0443835377468319	0.506854017868056	31.4135413657392	0	11.0951280548912	18.7205849702097	0.0291970802919708	28.5125628140704	121.119623999783	31.4135413657392	31.9212261422788	92.2338755776441
fb_rec20p_per9	10	20	2	FilterBank	7	110	1	1	256	314	114	0	0	0.0891089108910891	0.363057324840764	0	0.25	0.0769230769230769	0	11.3659182594472	28.6873971163374	15.8859096544637	23.0627346235913	0.722155659981276	14.9453174407719	-0.00222870839688543	0.208332010922384	-0.484062662002942	9.72661657550746	0.00835904133055851	0.219881595697281	39.2219696676727	0	15.8859096544637	13.7787984492642	0.0891089108910891	18.8363636363636	149.730800243214	39.2219696676727	30.0512820512821	48.5758997563121
fb_rec20p_per9	10	20	2	FilterBank	7	110	1	2	298	392	135	0	0	0.109243697478992	0.344387755102041	0	0.177777777777778	0.132075471698113	0.0652173913043478	12.9033034297333	32.6576794309311	17.2770922770254	22.2647504693402	0.752601965201203	14.5787780316332	0.022308749367677	0.490251978513941	-0.642483974563475	22.1519996474317	-0.00431457892175232	0.151897221594866	32.7199618295118	0	17.2770922770254	15.4204074539723	0.0714285714285714	51.3448275862069	131.84108218987	32.7199618295118	52.3208588957055	77.4872075893723
fb_rec20p_per9	10	20	2	FilterBank	7	110	1	4	485	916	178	0	0	0.0730688935281837	0.194323144104804	0	0.142857142857143	0.0350877192982456	0.062992125984252	12.8427386988683	30.7107277337545	17.9141328819943	20.2242831881937	-0.279809883709274	12.6213330641407	0.00301535312469925	0.21536421585323	0.83418700181753	8.09743075380742	-0.00402660716216264	0.125175313256438	33.2548307133491	0	17.9141328819943	11.0698861146126	0.0250521920668058	36.5979614949037	113.026416535437	33.2548307133491	52.7294147778205	68.2256977996405
fb_rec20p_per9	10	20	2	FilterBank	7	110	1	3	382	445	147	0	0	0.168141592920354	0.330337078651685	0	0.3	0.177215189873418	0.141630901287554	15.4020815173883	36.5140218314457	19.9183313335153	23.9080064783103	0.623240563086488	15.8148837239938	-0.0195051182836464	0.315927648124768	0.505847071696135	23.0524123786315	-0.00211240153681089	0.204405260608815	29.6751287979869	0	19.9183313335153	15.8059564754343	0.0117994100294985	15.2527472527473	101.237586352616	29.6751287979869	24.3462643678161	89.9634338680149
fb_rec20p_per9	10	20	2	FilterBank	7	110	1	2	214	239	128	0	0	0.104895104895105	0.535564853556485	0	0.132075471698113	0.075	0.0784313725490196	13.8538440662262	34.5745379939818	8.27924462427543	23.5181662210908	0.853957585884485	22.6706605951423	-0.0235549639950197	0.371103673465963	4.59565689384287	27.5267368416281	0.00540549015081011	0.144229732242443	33.5301167499796	0	8.27924462427543	17.6280652501938	0.0769230769230769	-43.58	162.607099921017	33.5301167499796	11.3830845771144	89.6798130449786
fb_rec20p_per9	10	20	2	FilterBank	7	110	1	4	324	526	156	0	0	0.0930232558139535	0.296577946768061	0	0.192982456140351	0.0727272727272727	0.0585365853658537	15.1520147109615	35.4852157961395	19.9017067091863	21.6993034014527	-0.322246270362649	12.1645763015681	-0.00673683785258579	0.288587011447623	0.456561788050086	9.34628565477157	-0.00199096879389325	0.146818530646105	36.6636821231172	0	19.9017067091863	15.8216489884323	0.0132890365448505	18.7555555555556	133.511174244792	36.6636821231172	34.792576419214	90.1485925486826
fb_rec20p_per9	10	20	2	FilterBank	7	110	1	3	311	336	84	0	0	0.0794979079497908	0.25	0	0.0769230769230769	0.238805970149254	0	10.0464662087705	26.0193987017462	21.8157411085847	21.0205395820909	-0.459119906343403	9.18968898688476	-0.00776680080467614	0.411137238154371	-1.07581300175294	12.7563382927123	-0.00123843639089923	0.298156370740488	32.7736388559614	0	21.8157411085847	12.3693170277355	0.0376569037656904	6.73202614379085	112.279335881743	32.7736388559614	29.1558173784978	65.9003127014354
fb_rec20p_per9	10	20	2	FilterBank	7	110	1	3	269	417	130	0	0	0.111570247933884	0.311750599520384	0	0.225806451612903	0.208333333333333	0.0214285714285714	13.604178956623	32.5335608084706	20.2730988929018	21.751528369585	-0.862289115922119	11.1089059972827	0.0134907577881926	0.152490995388781	-0.810850277736573	8.93776642508725	-0.000619549682348372	0.154933839470425	37.1722095453271	0	20.2730988929018	15.1632376487402	0.0371900826446281	44	149.74426504261	37.1722095453271	56.2603174603175	62.7977086758363
fb_rec20p_per9	10	20	2	FilterBank	7	110	1	3	285	433	192	0	0	0.196581196581197	0.443418013856813	0	0.315789473684211	0.235294117647059	0.0879120879120879	15.5444745058051	37.0962095456986	13.5668833036878	24.0329961718818	0.164286652354778	20.5473009594023	0.0366440678850268	0.567503540079225	-0.461056797825398	14.4116502349195	-0.00879455807435029	0.156024606677376	30.3713174233254	0	13.5668833036878	17.7381185446929	0.00854700854700855	0.591304347826087	112.057597496662	30.3713174233254	15.9354030501089	78.1593443648977
fb_rec20p_per9	10	20	2	FilterBank	7	110	1	4	271	409	189	0	0	0.160550458715596	0.462102689486553	0	0.25	0.140350877192982	0.0740740740740741	15.0224221978016	34.861280257327	12.3348670543256	23.0508176678156	-1.26148634436262	21.6796826785213	0.0283516234167465	0.269592639023268	1.21857836397039	9.90935149497941	0.0386216441812515	0.154890458854406	32.5219545215763	0	12.3348670543256	16.6871360122202	0.0688073394495413	15.1288343558282	147.284847922521	32.5219545215763	34.9974937343358	66.2289480717807
fb_rec20p_per10	10	20	2	JAR_FilterBank	7	110	1	0	171	251	138	0	0	0.101351351351351	0.549800796812749	0	0.159420289855072	0.0416666666666667	0	16.2843834935781	36.9809741791616	6.84625335165916	23.211065089906	1.30062438630901	28.8072620898434	0.0149765298026573	0.404395498824215	-2.534005513104	13.9257421893669	0.00265785283002179	0.156428338351367	34.2829414019143	0	6.84625335165916	21.1968048222679	0.0608108108108108	11.420814479638	179.889939385339	34.2829414019143	-4.33333333333333	57.6465139221435
fb_rec20p_per10	10	20	2	JAR_FilterBank	7	110	1	2	357	356	83	0	0	0.0735294117647059	0.23314606741573	0	0.0857142857142857	0.0909090909090909	0.0452261306532663	10.3520057819014	27.3723663507199	23.5351534917381	18.5872126954015	-0.583426727284473	7.7908071228643	-0.00730650172892455	0.143622187702071	-0.55764328724197	9.83108101205853	-0.0154876487341232	0.143198970218138	33.3975068274352	0	23.5351534917381	8.89480652946231	0.0404411764705882	44.9785932721713	121.673086716594	33.3975068274352	78.530303030303	68.8401820564101
fb_rec20p_per10	10	20	2	JAR_FilterBank	7	110	1	3	364	587	235	0	0	0.0833333333333333	0.400340715502555	0	0.119047619047619	0.12987012987013	0.025	17.837630427153	38.6903432721425	13.2997530620759	26.6367590852674	0.690519830755746	18.9258569674357	-0.0241359377379754	0.657631119308393	-0.45925332293435	17.6421120325274	-0.00233568805426979	0.180779160155546	35.0873177712909	0	13.2997530620759	19.3114578918047	0.0316091954022989	13.1439688715953	130.757214019478	35.0873177712909	27.5263000597729	69.0889648392606
fb_rec20p_per10	10	20	2	JAR_FilterBank	7	110	1	2	364	533	191	0	0	0.084985835694051	0.358348968105066	0	0.1	0.0483870967741935	0.0815450643776824	15.3287338931289	34.4950777804007	16.0214982988119	22.7405591228741	0.177834408676098	17.1461421721371	0.00296608972236461	0.457091245726231	0.0771639117921414	18.9389921874568	0.000341939097608836	0.170946536914506	31.3740275578293	0	16.0214982988119	16.8650191349702	0.0424929178470255	6.64642082429501	139.588863441695	31.3740275578293	33.788416988417	67.4208006585345
fb_rec20p_per10	10	20	2	JAR_FilterBank	7	110	1	1	258	373	180	0	0	0.162995594713656	0.482573726541555	0	0.321428571428571	0.177777777777778	0.0638297872340425	16.6708713909895	38.0209064064196	9.54311469747671	22.5068975519026	-3.20915750936241	25.744899663643	-0.00339881134533813	0.525633789361397	0.588961313462974	20.592316529823	0.0124307255279637	0.163460680697254	32.0872620437714	0	9.54311469747671	19.3522677658375	0.0484581497797357	12.2920634920635	136.742693072741	32.0872620437714	36.4225414225414	72.7344234881907
fb_rec20p_per10	10	20	2	JAR_FilterBank	7	110	1	3	311	382	134	0	0	0.121863799283154	0.350785340314136	0	0.130434782608696	0.19047619047619	0.0818713450292398	16.3838177115929	39.1835935069424	20.1284859835952	25.3028643786696	0.326926233721138	13.739321845383	0.0202581845834694	0.521608197180505	-0.456330278002214	23.1675686105874	0.00345426145262202	0.14815932219579	34.6844476469163	0	20.1284859835952	18.2113100478218	0.032258064516129	14.5730994152047	129.158699722934	34.6844476469163	38.7310842385735	75.2360076903766
fb_rec20p_per10	10	20	2	JAR_FilterBank	7	110	1	5	577	868	152	0	0	0.0247349823321555	0.175115207373272	0	0	0.106060606060606	0.013215859030837	14.8348038169516	32.8709987870221	23.4330554155416	19.6969380206339	-0.0185771432771241	7.3385147403117	0.010635272880744	0.174644217479334	0.0661605754312853	4.56690737084693	0.0106390753036239	0.137259704208163	35.6703130171407	0	23.4330554155416	8.10224368662132	0.00530035335689046	36.529702970297	87.8573622020158	35.6703130171407	58.3095516569201	44.6634000398415
fb_rec20p_per10	10	20	2	JAR_FilterBank	7	110	1	1	207	322	134	0	0	0.117948717948718	0.416149068322981	0	0.271428571428571	0.0465116279069767	0.0217391304347826	15.3399709328595	34.0690994070947	13.5740542839266	22.8970632996215	0.819491836278053	17.4184786145395	-0.0165506224685656	0.264630582100056	-0.1890356175297	15.6619293126496	0.00386455215112431	0.206540583304385	35.5334127807486	0	13.5740542839266	17.4408594620993	0.102564102564103	28.9403973509934	164.596808573352	35.5334127807486	32.9227216748768	103.16486329307
fb_rec20p_per10	10	20	2	JAR_FilterBank	7	110	1	0	217	328	179	0	0	0.177777777777778	0.545731707317073	0	0.2	0.0576923076923077	0.275	14.6519263507024	33.2803314226015	5.24754097364322	19.5626130631428	-0.994189546888713	28.6816700932921	-0.0391278474613585	0.635659244395826	-1.58728627829785	23.6027996154765	-0.0187825525812892	0.117168576965485	22.1004475472685	0	5.24754097364322	18.6540000433364	0.05	2.89655172413793	136.869648920993	22.1004475472685	21.5123287671233	129.299192170293
fb_rec20p_per10	10	20	2	JAR_FilterBank	7	110	1	1	206	342	170	0	0	0.157894736842105	0.497076023391813	0	0.1875	0.0930232558139535	0.149253731343284	14.5542378414811	33.491439134238	8.24038015485946	20.5867706829775	2.6074512931156	23.0912468436701	0.0192800823145077	0.312930949049722	2.99846876144816	25.7015658135349	0.0219947806650423	0.188654638216444	28.3396636661304	0	8.24038015485946	16.7700738032551	0.0894736842105263	10.5514950166113	172.240379042655	28.3396636661304	24.350641025641	97.314754588514
fb_rec20p_per10	10	20	2	JAR_FilterBank	7	110	1	2	385	594	234	0	0	0.164345403899721	0.393939393939394	0	0.137254901960784	0.203125	0.143497757847534	17.0322741462751	36.5644417218416	12.7481356801621	21.8837003414674	-2.18551024283432	19.7712325247921	0.0125493137692122	0.355556421552168	-0.6584858437029	22.1558492736259	0.022735086271988	0.150044197890596	25.4271696957773	0	12.7481356801621	15.9467390997052	0.0278551532033426	37.0777988614801	124.693234303539	25.4271696957773	41.9016791044776	81.3894575211652
fb_rec20p_per10	10	20	2	JAR_FilterBank	7	110	1	1	317	449	193	0	0	0.0882352941176471	0.429844097995546	0	0.157894736842105	0.087719298245614	0.0738255033557047	16.1535754039074	35.8222412158305	12.9087993879697	23.4877327407546	0.244370481834558	19.5283534726409	0.00241091966355858	0.266337098997348	1.10367339981016	11.1786691783931	-0.00410008027551704	0.163433883478648	31.7128916604842	0	12.9087993879697	17.0107459226005	0.0588235294117647	10.9138381201044	134.597598415071	31.7128916604842	42.8739967897271	60.2836816943032
fb_rec20p_per10	10	20	2	JAR_FilterBank	7	110	1	1	278	338	118	0	0	0.147540983606557	0.349112426035503	0	0.0882352941176471	0.0666666666666667	0.224137931034483	12.0662048893338	29.3990281072434	11.0546865857919	18.371408274679	-0.350234255950434	14.7597204334307	-0.00377893907335088	0.203725208584508	1.07328435016322	18.0748119637522	-0.013487499631538	0.202073072720072	20.2915588924595	0	11.0546865857919	12.7695494226395	0.0327868852459016	-5.53020134228188	114.813246519687	20.2915588924595	-1.46508563899868	71.8665448882211
fb_rec20p_per10	10	20	2	JAR_FilterBank	7	110	1	3	313	516	225	0	0	0.125	0.436046511627907	0	0.254237288135593	0.142857142857143	0.0559006211180124	16.9144412070895	38.2462776687617	13.131751342231	25.7300751058691	-0.998069626122571	22.8261328999429	0.00265368492438526	0.521119253574876	0.473387328881876	12.6470653698302	-0.0094933534135497	0.143955935198757	35.6254413673874	0	13.131751342231	17.000370159385	0.0427631578947368	2.70046082949309	147.267419950924	35.6254413673874	36.8363980631012	75.8963394948955
fb_rec20p_per10	10	20	2	JAR_FilterBank	7	110	1	0	252	248	132	0	0	0.192982456140351	0.532258064516129	0	0.037037037037037	0.162790697674419	0.261904761904762	11.1535687316538	29.3234818231514	5.14916689353043	18.3225746134672	1.69615330197571	24.2105492241971	-0.00338952934570154	0.32046538645614	3.18173633418539	29.8259338782238	-0.00726992036083835	0.135546017899323	18.6069370005415	0	5.14916689353043	14.019309546014	0.087719298245614	-22.5668449197861	134.122715323686	18.6069370005415	-2.11764705882353	73.189088455916
fb_rec20p_per10	10	20	2	JAR_FilterBank	7	110	1	1	357	592	242	0	0	0.168115942028985	0.408783783783784	0	0.2	0.146067415730337	0.111111111111111	16.0916031340171	36.613567323938	13.082725285337	22.817637757587	-1.14540261485235	15.6359200102272	-0.00712327033712289	0.536312085660297	-1.53761803095334	20.09793426669	-0.0132446671579476	0.264399096300224	30.3339680006191	0	13.082725285337	16.2851488928959	0.0434782608695652	-0.665280665280665	108.155858893034	30.3339680006191	28.7849209801363	68.0360891311626
fb_rec20p_per10	10	20	2	JAR_FilterBank	7	110	1	3	346	565	216	0	0	0.146627565982405	0.382300884955752	0	0.234042553191489	0.146666666666667	0.114285714285714	15.6904294734836	35.8126777002536	14.4172053735208	22.6074857404258	-0.2529450791929	15.04374626916	0.00132024080332252	0.484594053631232	0.708956147007784	17.2470639968706	-0.00690693143794105	0.27664431475593	27.9243868936797	0	14.4172053735208	15.9479038911562	0.0234604105571848	10.3613445378151	134.967612869392	27.9243868936797	29.4822520852641	82.4712143913543
fb_rec20p_per10	10	20	2	JAR_FilterBank	7	110	1	1	252	420	192	0	0	0.173333333333333	0.457142857142857	0	0.145833333333333	0.152173913043478	0.211111111111111	14.9092446918938	35.2704921890388	8.1599653302957	22.6736433432955	0.97523789734733	25.0825398885338	0.0194174292893009	0.514359064036324	-1.57602818700166	26.7182897501957	0.00530815517133635	0.167140921128903	26.4442939633028	0	8.1599653302957	18.9222666882717	0.0444444444444444	7.31301939058172	127.956824628128	26.4442939633028	4.92348484848485	99.3583474096509
fb_rec20p_per10	10	20	2	JAR_FilterBank	7	110	1	0	273	540	259	0	0	0.150793650793651	0.47962962962963	0	0.111111111111111	0.267441860465116	0.0720720720720721	12.5635914763113	30.732942293319	6.9809949884954	20.3599143010804	0.116007729605507	25.0476966929875	0.00755603508616124	0.636707302405355	1.56543604636323	21.345107746284	0.0219840890019485	0.251343131707449	23.8493338141584	0	6.9809949884954	15.0684851965521	0.0555555555555556	9.77570093457944	127.327515393659	23.8493338141584	22.5187393408847	93.6655067545885
fb_rec20p_per10	10	20	2	JAR_FilterBank	7	110	1	2	358	570	210	0	0	0.0839160839160839	0.368421052631579	0	0.131578947368421	0.155555555555556	0.0402010050251256	15.4231245270379	35.628560935673	14.6356329364884	23.1212748221191	-0.648466747775585	20.1880076422192	0.0329942784151835	0.575747444651636	-0.205161534518706	12.4576554161825	0.0120093977080382	0.134816194873501	34.9585653418662	0	14.6356329364884	15.7590414826862	0.0384615384615385	39.117296222664	129.10633746471	34.9585653418662	67.7527113237639	60.7987479670882
fb_rec20p_per10	10	20	2	JAR_FilterBank	7	110	1	1	286	416	133	0	0	0.0893617021276596	0.319711538461538	0	0.0810810810810811	0.186440677966102	0.0232558139534884	11.2476125529984	28.79690636603	16.8103850599976	22.5660915195721	-0.294909455811975	15.4841532131794	-0.00309508450199634	0.270967093419114	0.559595645089498	12.2652656543118	0.0121478665230858	0.104130240273785	34.9450279057987	0	16.8103850599976	13.5218228375624	0.0382978723404255	6.43850267379679	117.32332088502	34.9450279057987	40.1270216962525	76.1785675705251
fb_rec20p_per10	10	20	2	JAR_FilterBank	7	110	1	4	325	448	140	0	0	0.0859106529209622	0.3125	0	0.282051282051282	0.0714285714285714	0.0114942528735632	12.916240217959	32.3307312909348	20.4251597140308	23.2415806284371	-0.794889308470973	12.4425366075924	0.00282686923107682	0.179916568051863	-0.0247499254961265	2.72188257957976	0.00585738417113655	0.123274503648675	36.9051633832126	0	20.4251597140308	14.3901970676448	0.0343642611683849	22.3241895261845	130.692251638741	36.9051633832126	32.174672489083	78.29658562553
fb_rec20p_per10	10	20	2	JAR_FilterBank	7	110	1	3	364	596	305	0	0	0.19375	0.511744966442953	0	0.342105263157895	0.0925925925925926	0.21830985915493	15.4720784901853	35.5866881227499	6.90671816379851	21.7507487543721	0.203214111910154	26.8695306027937	-0.0193362156456936	0.428904121552557	-1.9450856421003	33.0320671864625	-0.0158216249037175	0.19234560902044	25.6541728195105	0	6.90671816379851	18.2955807740123	0.1	11.5447154471545	115.887103713257	25.6541728195105	36.3214814814815	75.0888765036311
fb_rec20p_per10	10	20	2	JAR_FilterBank	7	110	1	1	312	542	154	0	0	0.066006600660066	0.284132841328413	0	0.166666666666667	0.0625	0.03125	13.6116942092063	32.7603902795208	19.1853923996898	20.958920205101	-0.237685258483305	12.4573953155714	0.0165206836430221	0.301503414810584	-0.551766891497389	17.0884565325566	0.007551622982748	0.124686018641314	34.3171668619008	0	19.1853923996898	14.6916331000341	0.0297029702970297	28.517453798768	143.786862166803	34.3171668619008	28.014684287812	98.7754013966907
fb_rec20p_per10	10	20	2	JAR_FilterBank	7	110	1	2	377	456	133	0	0	0.114624505928854	0.291666666666667	0	0.217391304347826	0.0303030303030303	0.0701754385964912	12.1516199341265	31.176878836407	15.2006488971859	22.9440854483608	0.11197043486749	18.911026638966	-0.0253231654648176	0.590410652322221	-0.214978866044425	12.082487738704	0.01356917085251	0.140230925815066	33.8374502813227	0	15.2006488971859	15.406505096812	0.0197628458498024	39.0260047281324	99.0395429901924	33.8374502813227	50.9896907216495	49.3813530381979
fb_rec20p_per10	10	20	2	JAR_FilterBank	7	110	1	2	410	560	186	0	0	0.104591836734694	0.332142857142857	0	0.15625	0.125	0.0822510822510823	15.1743049652624	35.7580552852987	18.2166746854247	24.1563688051584	0.340279911024085	15.0529291373365	0.0338137783031849	0.494266644075056	-0.824715067149285	20.2423418150827	-0.00218150747909264	0.16222766919438	34.0595539190002	0	18.2166746854247	14.393793098367	0.0408163265306122	43.328	119.792457532866	34.0595539190002	58.0368013281682	72.1274866262087
fb_rec20p_per10	10	20	2	JAR_FilterBank	7	110	1	1	349	648	291	0	0	0.175595238095238	0.449074074074074	0	0.225	0.197530864197531	0.12807881773399	15.2848233061153	34.5910055978139	10.872651868803	23.5512193349465	-2.8470366103119	26.8370871688235	-0.00162728778074522	0.50496375853843	-2.96715211110176	27.6868206474131	-0.0126874484600035	0.188928507389715	29.0042419550209	0	10.872651868803	15.2322651943094	0.0297619047619048	4.80311890838207	112.406950364528	29.0042419550209	30.1378286973704	82.9801509771656
fb_rec20p_per10	10	20	2	JAR_FilterBank	7	110	1	0	295	448	239	0	0	0.296296296296296	0.533482142857143	0	0.254901960784314	0.295454545454545	0.15	16.327083850928	37.4602320803239	3.78385520845917	19.5827692124881	2.2884414963586	28.764279473175	-0.00191162014993515	0.66423288509508	4.13299371167006	23.3474397422058	-0.0188078025535678	0.154611459639924	22.3816614942185	0	3.78385520845917	20.4592527623887	0.037037037037037	9.43620178041543	153.225565891184	22.3816614942185	13.9174603174603	116.912401483449
fb_rec20p_per10	10	20	2	JAR_FilterBank	7	110	1	2	347	622	303	0	0	0.209677419354839	0.487138263665595	0	0.170731707317073	0.183098591549296	0.0581395348837209	15.9909146863513	37.8173860023676	7.33177665320555	24.2928861452055	0.156398947769129	28.7280803827878	-0.00603772709189446	0.591400907733285	-1.75866366738179	30.2327215831776	-0.0333670284108294	0.313340445082275	32.8077548182193	0	7.33177665320555	17.859138895851	0.0741935483870968	16.7426160337553	137.200233291089	32.8077548182193	29.3125267436885	72.6177709586285
fb_rec20p_per10	10	20	2	JAR_FilterBank	7	110	1	0	238	297	99	0	0	0.0552147239263804	0.333333333333333	0	0.0476190476190476	0.05	0.0675675675675676	10.1579064229453	27.0061970073693	15.6390496641832	19.0671724218056	0.69397934751424	12.7358396622532	0.00651899282836262	0.146915575370489	-1.08989211342427	20.3836997824712	0.0122564115703063	0.147562106844061	33.4711925475392	0	15.6390496641832	11.5791254904756	0.110429447852761	-33.1044776119403	167.02222457049	33.4711925475392	0.378571428571429	118.777045609438
fb_rec20p_per10	10	20	2	JAR_FilterBank	7	110	1	2	310	425	206	0	0	0.0909090909090909	0.484705882352941	0	0.113636363636364	0.109090909090909	0.094017094017094	14.2469541157859	35.105618885983	11.9104278870775	26.1794098568159	1.82288787661675	26.5516359870236	-0.019882393086864	0.588199679193814	0.714483738414832	15.5445130776358	0.0094072151468834	0.121719046799983	35.2545349126028	0	11.9104278870775	17.2795102288362	0.0330578512396694	13.3214285714286	139.35841566643	35.2545349126028	23.2167714884696	61.3326779310761
fb_rec20p_per10	10	20	2	JAR_FilterBank	7	110	1	2	294	526	173	0	0	0.140794223826715	0.328897338403042	0	0.270833333333333	0.166666666666667	0.0392156862745098	13.1458311427516	32.1835461434338	16.7922906360761	21.6557195495579	-1.24050244261374	14.1007000937163	0.00328021582287787	0.211325256795406	-0.95684110997292	10.6502318466868	0.00796370488095827	0.174110863446313	35.4502773081374	0	16.7922906360761	14.4195731899448	0.0505415162454874	41.8316221765914	157.275453578719	35.4502773081374	72.4086021505376	94.2328612630394
fb_rec20p_per10	10	20	2	JAR_FilterBank	7	110	1	2	288	449	208	0	0	0.135135135135135	0.463251670378619	0	0.32	0.129032258064516	0.0714285714285714	14.0414338518879	33.4013557353493	11.0277682728264	25.4889101549201	0.973512059716346	24.6784732930739	-0.00152195142239314	0.622514187518618	4.94475920637791	26.8190356367932	0.0064903613367065	0.155047119786389	32.5694300582479	0	11.0277682728264	16.2261937119665	0.0308880308880309	-3.04607046070461	156.329781516947	32.5694300582479	33.8088781275222	87.5453153653423
fb_rec20p_per10	10	20	2	JAR_FilterBank	7	110	1	2	256	411	131	0	0	0.108490566037736	0.318734793187348	0	0.19047619047619	0.142857142857143	0.0175438596491228	10.925038457857	28.4238875077664	15.8424479157215	22.6274047091363	0.576875809038787	15.4407185127805	-0.00668855455890093	0.348322256753905	-1.93956335415629	16.892753236422	0.0233391208820426	0.342966752971227	35.0223470156778	0	15.8424479157215	13.6318084110398	0.0235849056603774	-7.89071038251366	136.011236727729	35.0223470156778	30.2567307692308	95.8034832742592
fb_rec20p_per10	10	20	2	JAR_FilterBank	7	110	1	1	352	502	163	0	0	0.0851735015772871	0.324701195219123	0	0.228571428571429	0.0754716981132075	0.045	12.9485728365868	31.4845744398898	17.4133114430953	21.5751833266306	-0.759309830715633	18.8267641234784	0.00574862447314663	0.25581119965791	-1.13628081062447	15.5907038130385	0.00304528310204418	0.174845973013059	32.7486615830829	0	17.4133114430953	12.0543592617021	0.0189274447949527	20.2046511627907	114.941213217013	32.7486615830829	50.0016084656085	82.3365927459587
fb_rec20p_per10	10	20	2	JAR_FilterBank	7	110	1	0	239	357	201	0	0	0.197916666666667	0.563025210084034	0	0.292682926829268	0.186440677966102	0.130434782608696	13.5143569896742	33.8424597148261	4.07755952424792	20.0585457618669	1.02319274840645	25.4225741806598	0.0352745504564864	0.529102237015176	-1.1337364380807	20.4570740411776	0.00710780349567818	0.18773107116653	20.3063005287308	0	4.07755952424792	15.6420823660317	0.0625	9.21400778210117	173.364198807065	20.3063005287308	6.93423423423424	101.404809367295
fb_rec20p_per10	10	20	2	JAR_FilterBank	7	110	1	3	517	863	219	0	0	0.050880626223092	0.253765932792584	0	0.155555555555556	0.114754098360656	0.0230769230769231	14.8405469847906	35.0858041509928	21.9169297034257	21.9381795117476	-0.301153304909368	12.8681779798402	0.017612152658105	0.353812416533663	0.456078893101801	11.8320821213725	-0.00137462271925026	0.140489412765187	36.6219895079691	0	21.9169297034257	11.2408371385674	0.0293542074363992	63.2388059701493	127.85420435276	36.6219895079691	76	51.666708888214
fb_rec20p_per10	10	20	2	JAR_FilterBank	7	110	1	1	276	389	159	0	0	0.18007662835249	0.408740359897172	0	0.189655172413793	0.267857142857143	0.0902255639097744	14.5100866565066	34.5515838322231	13.2142726384973	23.3643440095488	0.00336797223362408	21.3877391446769	0.033914751093749	0.611363942068182	0.34845759170654	27.1515096018315	0.00317381820867448	0.201802724982332	29.8608668153982	0	13.2142726384973	15.5020824534863	0.0727969348659004	23.6109422492401	153.145696218164	29.8608668153982	39.8078930202218	76.0748038545728
fb_rec20p_per10	10	20	2	JAR_FilterBank	7	110	1	3	372	418	109	0	0	0.134868421052632	0.260765550239234	0	0.181818181818182	0.245614035087719	0.0660377358490566	13.1445035414479	34.0896569632253	21.7092288979156	23.2174347973874	-0.977704685480498	11.5000824025049	-0.00268266603343503	0.159988614032955	0.874533891408822	20.5546208971099	-0.020370301134633	0.163214466909115	32.3750142275084	0	21.7092288979156	14.1383352054456	0.0164473684210526	53.1657754010695	93.9999960345265	32.3750142275084	57.4321691588624	76.5909944038461
fb_rec20p_per10	10	20	2	JAR_FilterBank	7	110	1	0	237	235	111	0	0	0.15606936416185	0.472340425531915	0	0.1	0.211538461538462	0.0769230769230769	11.7020001405644	29.698369447192	10.0026663434651	21.3022225933116	-0.954967681449586	21.9878744612064	0.0376009785685831	0.607463628460923	-2.66264766190792	22.0279537068716	-0.0235272377411683	0.129870966716534	25.3547668897121	0	10.0026663434651	13.383668798683	0.046242774566474	0.352331606217617	151.568879443933	25.3547668897121	29.7156626506024	134.762573808335
fb_rec20p_per10	10	20	2	JAR_FilterBank	7	110	1	2	258	362	120	0	0	0.0756302521008403	0.331491712707182	0	0.109090909090909	0.0576923076923077	0.0601503759398496	13.1561660863142	31.7222810180684	15.6986124074441	20.5166043901963	-1.25626225593805	14.8339478957638	0.00121251129020946	0.174045528201776	-0.145524235164791	5.53465631203758	0.00548984654860683	0.133716605200934	31.1396930952139	0	15.6986124074441	13.1229436456902	0.0504201680672269	-10.4723032069971	166.837381752241	31.1396930952139	39.2492569002123	75.7061033366628
fb_rec20p_per10	10	20	2	JAR_FilterBank	7	110	1	4	410	724	290	0	0	0.163538873994638	0.400552486187845	0	0.1875	0.140625	0.167300380228137	15.6894099944256	35.7999232681136	13.9456676945549	21.8734264950233	0.248643025718935	17.7382641699178	-0.0114299000030372	0.321620056708631	-0.695797384832461	18.8617495916926	-0.010405878140638	0.110069059119383	29.66884259696	0	13.9456676945549	12.9162651903872	0.0241286863270777	34.9915966386555	116.312847013746	29.66884259696	48.8015026528794	62.3242049486076
fb_rec20p_per10	10	20	2	JAR_FilterBank	7	110	1	3	475	738	256	0	0	0.121681415929204	0.346883468834688	0	0.138888888888889	0.0677966101694915	0.126843657817109	11.9439681990316	29.3426893792298	13.8280823995565	21.0055851965815	-0.502772711810786	16.1827576901909	-0.00212784968346028	0.383825200612637	0.19850318036046	22.7688931141574	0.000176364140617167	0.175620003794527	26.3358660728815	0	13.8280823995565	11.10567958213	0.0309734513274336	30.0404354587869	96.403963710652	26.3358660728815	41.2704192546584	62.7774292229512
fb_rec20p_per10	10	20	2	JAR_FilterBank	7	110	1	3	342	319	114	0	0	0.160493827160494	0.357366771159875	0	0.176470588235294	0.0967741935483871	0.150602409638554	13.1658068182739	32.785252615379	14.3120494469401	22.4209853488037	0.0261658558925433	13.5847074041447	-0.0197347471586058	0.258629438146813	-0.359425651595497	18.2841467473934	0.00479710865030048	0.126144894350493	24.926313499665	0	14.3120494469401	16.1504686054223	0.0205761316872428	35.1824817518248	135.535201162864	24.926313499665	48.1737209027532	71.0455851747018
fb_rec20p_per10	10	20	2	JAR_FilterBank	7	110	1	2	285	460	223	0	0	0.184615384615385	0.484782608695652	0	0.222222222222222	0.216216216216216	0.114035087719298	14.5821170068709	33.7361548482384	8.81793336736709	23.3012667253806	0.440145927178066	24.1885273611949	-0.012196131328817	0.421296199697332	1.13117332725976	10.6637094419842	0.00750066727788591	0.122939147852229	28.1596719243047	0	8.81793336736709	15.5242756175858	0.0269230769230769	-5.93905817174515	132.241893883895	28.1596719243047	19.2535714285714	78.6215356534911
fb_rec20p_per10	10	20	2	JAR_FilterBank	7	110	1	1	253	415	181	0	0	0.142241379310345	0.436144578313253	0	0.0888888888888889	0.134328358208955	0.0952380952380952	15.2159420589864	34.9230263350403	11.0871272708764	22.3275800248832	2.49847454797146	22.8516599290119	-0.00297973978740623	0.413227940824349	-0.273339124282525	11.7766158461498	-0.0273763992748847	0.152606070596851	29.7258817578647	0	11.0871272708764	16.6088451317565	0.0474137931034483	6.06818181818182	142.633257167626	29.7258817578647	8.84873515745999	93.9057215334134
fb_rec20p_per10	10	20	2	JAR_FilterBank	7	110	1	3	416	679	214	0	0	0.0843989769820972	0.315169366715758	0	0.210526315789474	0.102564102564103	0.0627615062761506	13.9692256459603	32.1506848000915	16.9175304999086	21.2701747329989	-0.260250527219072	15.5933138430452	0.0135182102844607	0.311798011580155	-0.180455323267386	13.0894301076378	0.0189092339958146	0.171443690410329	32.4546034301214	0	16.9175304999086	12.4915707539097	0.0434782608695652	39.3049403747871	112.269820765564	32.4546034301214	55.6551412429379	66.348457599981
fb_rec20p_per10	10	20	2	JAR_FilterBank	7	110	1	6	480	559	94	0	0	0.046189376443418	0.168157423971377	0	0.0285714285714286	0.0185185185185185	0.0512048192771084	13.9570863919751	34.5004201641039	26.9018560295396	20.0327857469236	0.157963705359031	7.84332912760585	0.00310615153518222	0.145901753570964	-0.10958246087245	3.81455034069316	0.00393173514297221	0.13898658517427	35.7212836767789	0	26.9018560295396	11.1918781733884	0.0207852193995381	31.3069679849341	90.6076860022168	35.7212836767789	47.0421052631579	36.7636437909927
fb_rec20p_per10	10	20	2	JAR_FilterBank	7	110	1	4	268	485	227	0	0	0.192307692307692	0.468041237113402	0	0.290909090909091	0.149253731343284	0.167832167832168	16.4722383875655	36.6134774658843	11.1898020071318	22.2950072824934	-2.420100496542	25.5277558534836	0.00347953849487722	0.34197907429255	-3.36638637359773	22.1253158524207	0.0100257159711538	0.241489282482424	27.8451152535354	0	11.1898020071318	17.7098453827762	0.0576923076923077	3.2544080604534	132.199146767387	27.8451152535354	18.8957210470395	100.485591328071
fb_rec20p_per10	10	20	2	JAR_FilterBank	7	110	1	4	428	523	138	0	0	0.113022113022113	0.263862332695985	0	0.14	0.127272727272727	0.101694915254237	16.1036523686989	36.4168684268115	23.0710495502218	22.0335306343291	-0.221945203459747	10.870213823728	0.00829181418804027	0.297775652914183	-0.574646244061457	14.2029616824031	0.00891705457253089	0.149587052778255	32.4955032049809	0	23.0710495502218	14.2202527537271	0.0221130221130221	32.2942345924453	111.703403284498	32.4955032049809	42.5157423971378	65.9403105876629
fb_rec20p_per10	10	20	2	JAR_FilterBank	7	110	1	3	235	343	186	0	0	0.213541666666667	0.542274052478134	0	0.232558139534884	0.287878787878788	0.1375	14.8913894527301	37.2104698005217	9.27518060620553	23.8339400624335	-0.108582320437878	28.871484911866	-0.0213979812157451	0.403305822567247	-2.55389440965827	41.6501790483525	0.00214812244792152	0.145815724185464	27.8471294539379	0	9.27518060620553	18.240954411507	0.0572916666666667	27.254752851711	169.726834095428	27.8471294539379	15.9023718828597	115.141868302031
fb_rec20p_per10	10	20	2	JAR_FilterBank	7	110	1	3	362	543	164	0	0	0.092814371257485	0.302025782688766	0	0.177777777777778	0.0625	0.0694444444444444	14.6401119340324	35.2475057386821	19.4423716513455	22.5057546630272	0.666740687909827	13.7777513370039	0.00484167126171768	0.391073688985089	-0.121168995049805	11.2394735511469	0.0125129808318993	0.160807486941507	35.2981687248617	0	19.4423716513455	14.1064861938445	0.0269461077844311	9.50101419878296	124.220833791075	35.2981687248617	41.8184204359034	70.0249417776023
fb_rec20p_per10	10	20	2	JAR_FilterBank	7	110	1	3	286	559	192	0	0	0.0476190476190476	0.343470483005367	0	0.138888888888889	0.0666666666666667	0	13.126786745304	31.450478302692	13.9403835947596	21.9309273593315	-0.516974844019405	15.9724403345328	-0.00781410786709015	0.196321955759441	1.56498882566804	24.0924835373541	-0.00352423540268979	0.112236301748891	36.558371226167	0	13.9403835947596	11.3717445126244	0.0555555555555556	23.0327868852459	111.645885956197	36.558371226167	48.2697674418605	51.9063282934236
fb_rec20p_per10	10	20	2	JAR_FilterBank	7	110	1	3	298	506	187	0	0	0.0803571428571429	0.369565217391304	0	0.153846153846154	0.173076923076923	0.015625	13.3021764488393	35.2355345434035	13.6793537594587	22.0790344192334	-0.0927046195275349	16.2161741057732	-5.3874664258351e-06	0.306148346513599	-2.10794482050788	16.025054872975	-0.0094875712828045	0.140840583109753	37.1842283064527	0	13.6793537594587	15.2381245151587	0.0625	9.18120805369128	126.054870269723	37.1842283064527	51.6388888888889	63.6905974360588
fb_rec20p_per10	10	20	2	JAR_FilterBank	7	110	1	1	293	450	165	0	0	0.127737226277372	0.366666666666667	0	0.113636363636364	0.183333333333333	0.0967741935483871	14.7219241841727	36.3341320057874	14.3934135750325	23.5353868837141	0.145413850746968	17.0027844476479	0.00528095145370421	0.653100321323749	0.121515724767632	8.29326283976021	0.0188060185647702	0.209454398273041	32.9105146682422	0	14.3934135750325	15.8623697242891	0.0291970802919708	17.1557788944724	138.482567551438	32.9105146682422	30.4115079365079	79.967908287171
fb_rec20p_per10	10	20	2	JAR_FilterBank	7	110	1	2	231	326	137	0	0	0.118918918918919	0.420245398773006	0	0.206896551724138	0.0714285714285714	0.0666666666666667	14.619298899953	34.4427484543171	13.2590408227854	23.7664320137214	-0.918582205369045	20.2003979566393	-0.0444033459761255	0.493503035636709	0.00968653927505318	7.27118858758732	-0.0193202229029009	0.121441262487283	34.1855631657759	0	13.2590408227854	16.347089356395	0.0810810810810811	16.9175627240143	149.309262169424	34.1855631657759	16.8714285714286	89.7659741633852
fb_rec20p_per10	10	20	2	JAR_FilterBank	7	110	1	0	247	365	156	0	0	0.0926829268292683	0.427397260273973	0	0.142857142857143	0.0909090909090909	0.0919540229885057	13.725560887476	33.5027251611916	12.6251332448927	21.7564392757335	0.578751154151414	20.010522670697	-0.0251836446480734	0.410470092906212	0.646906181534602	31.0846325273997	0.00594776725437328	0.209710927944017	30.9692947997664	0	12.6251332448927	14.5386192340501	0.0585365853658537	-0.781456953642384	126.096197736429	30.9692947997664	17.1917562724014	83.8193060648797
fb_rec20p_per10	10	20	2	JAR_FilterBank	7	110	1	3	265	383	135	0	0	0.094488188976378	0.352480417754569	0	0.262295081967213	0.0612244897959184	0.027972027972028	14.3530289893733	33.5121542698032	18.8990386401522	24.9261437571218	-1.07028212579168	19.1920653886006	-0.026919721770081	0.493981543743184	-0.416329618408677	6.40358340244662	-0.00264950908307431	0.128399259263672	39.8891807802002	0	18.8990386401522	15.7335648382748	0.047244094488189	15.2896174863388	170.21906353443	39.8891807802002	50.5499587118084	83.6858886874675
fb_rec20p_per10	10	20	2	JAR_FilterBank	7	110	1	3	245	205	71	0	0	0.0666666666666667	0.346341463414634	0	0.0303030303030303	0.04	0	11.689087931807	30.1094807342371	18.438297172397	24.5731403385048	0.928631974546543	14.9578725827126	0.00948041692236548	0.15230749070491	-0.0913588135111283	1.29938583606211	0.00422021208950745	0.105926919391566	40.3278700817469	0	18.438297172397	14.2729445788611	0.08	8.50251256281407	143.172103624559	40.3278700817469	20.8260869565217	59.2006475862361
fb_rec20p_per10	10	20	2	JAR_FilterBank	7	110	1	2	216	296	90	0	0	0.0736842105263158	0.304054054054054	0	0.0833333333333333	0.12280701754386	0.025	12.8437150755008	31.4901426353643	14.6277436058848	18.5238451422441	0.0596925575566237	14.1345239888515	0.0200060614939416	0.236460532875593	1.74478453037198	17.7049437106837	0.0149429100419401	0.139050059814172	26.8733347576392	0	14.6277436058848	13.379306354684	0.0842105263157895	7.26530612244898	149.944441430072	26.8733347576392	23.557781201849	76.5475030642159
fb_rec20p_per11	20	20	1	FilterBank	7	110	1	2	370	713	356	0	0	0.116022099447514	0.49929873772791	0	0.285714285714286	0.157894736842105	0.0578512396694215	24.4214297295317	41.6196856676301	10.4347509981525	25.1615941327028	-0.951076601224505	24.7843492420906	0.0144078846874896	0.633485789329408	0.861628184384645	14.9335684282236	0.00881986271795317	0.153726729080793	35.4208640596009	0	10.4347509981525	20.4760238553303	0.0220994475138122	51.3164128595601	140.262005624072	35.4208640596009	64.866862745098	43.9541404932098
fb_rec20p_per11	20	20	1	FilterBank	7	110	1	4	383	758	360	0	0	0.14247311827957	0.474934036939314	0	0.294117647058824	0.142857142857143	0.0705394190871369	23.6554251451447	41.3232938209233	9.11781535182959	26.0198830077134	0.174542141117875	29.4750339814344	0.0388977374732761	0.656141370292979	-0.34320094968018	18.5173033816799	-0.00944066299830024	0.148007428855024	34.4911072172189	0	9.11781535182959	20.6467150327426	0.0241935483870968	33.28	117.721749292177	34.4911072172189	54.2263565891473	58.3346022725676
fb_rec20p_per11	20	20	1	FilterBank	7	110	1	0	218	188	131	0	0	0.0964912280701754	0.696808510638298	0	0.1	0.114285714285714	0.0277777777777778	20.0096795103856	38.4054865336082	0.985840812020696	27.0510700118138	-1.93121133776729	44.2164518767803	0.0458454595753593	0.624260849889272	0.180492666017228	27.7297725287464	0.0120474292533421	0.277712272174017	32.1707845959487	0	0.985840812020696	23.5833134903413	0.0087719298245614	33.0909090909091	216.745161318292	32.1707845959487	46.7054398148148	124.736816941809
fb_rec20p_per11	20	20	1	FilterBank	7	110	1	1	217	167	98	0	0	0.173913043478261	0.586826347305389	0	0.121951219512195	0.257142857142857	0.0227272727272727	19.7569681243944	37.9066550976764	7.5558954980336	25.6860075923759	-5.90199772926056	33.9425643432673	-0.0381552305912359	0.726441327052769	-0.641824612609685	7.512125008105	-0.0703073401504126	0.494458066187218	31.6464653598037	0	7.5558954980336	20.3580978803352	0.0289855072463768	25.2923076923077	140.452615318021	31.6464653598037	44.5714285714286	65.7571288910944
fb_rec20p_per11	20	20	1	FilterBank	7	110	1	2	281	423	186	0	0	0.125925925925926	0.439716312056738	0	0.280701754385965	0.109090909090909	0.0683229813664596	23.6204703070344	41.3232852685474	14.5830935126696	25.7355745712761	-1.54508943846343	20.5865290375784	0.0316787710167994	0.554636724717776	-0.0750761525555323	21.4650443577566	0.0228186679832971	0.155647953206709	34.123515599288	0	14.5830935126696	19.2509494799774	0.037037037037037	3.28409090909091	157.240262843205	34.123515599288	34.4802967673556	62.8140781885732
fb_rec20p_per11	20	20	1	FilterBank	7	110	1	2	252	543	287	0	0	0.158995815899582	0.528545119705341	0	0.269230769230769	0.213114754098361	0.0423728813559322	22.8948238352132	39.9271728841104	9.35813146684251	25.5375955344719	2.28622687474686	30.9187610912619	-0.0281904036077059	0.762755108501644	0.364767894979172	15.26698020851	-0.0190003745273252	0.177646774865269	35.3497047727358	0	9.35813146684251	22.0157832614542	0.0125523012552301	9.08597285067873	152.236052632615	35.3497047727358	30.8681887366819	102.910456257044
fb_rec20p_per11	20	20	1	FilterBank	7	110	1	2	245	367	183	0	0	0.0787037037037037	0.498637602179836	0	0.155172413793103	0.111111111111111	0.0175438596491228	20.3308221035126	36.8899857141043	9.60478135855049	25.2573933877426	2.20793727879682	27.5569268673865	-0.000163493743101656	0.548523678180797	-0.464006486404936	17.2570146439561	0.0249751352537809	0.156381419634545	37.2227168866735	0	9.60478135855049	18.5976347233377	0.0509259259259259	21.6918429003021	165.10063568308	37.2227168866735	45.6848816029144	65.0941308017972
fb_rec20p_per11	20	20	1	FilterBank	7	110	1	1	186	226	166	0	0	0.2265625	0.734513274336283	0	0.283018867924528	0.0666666666666667	0.121212121212121	21.0207684005815	38.9611161366525	3.33302045114331	23.6818579108417	-6.88128177647102	42.2389134185377	-0.0737648026991688	0.743802356310498	-3.31662347457847	19.9388127039575	0.0219293925120491	0.158770097199989	31.0099212210829	0	3.33302045114331	22.3005191150696	0.046875	-34.9928057553957	179.988465669206	31.0099212210829	23.0127659574468	125.486627374843
fb_rec20p_per11	20	20	1	FilterBank	7	110	1	0	161	131	109	0	0	0.20253164556962	0.83206106870229	0	0.0892857142857143	0.166666666666667	0	19.31165446475	37.7611054631532	-6.27283446296177	16.1811345131827	1.78455795343472	46.4551405943449	0.0179835371447012	0.529748486253487	6.6162494362682	38.8069764997396	-0.0857523645329886	0.242363490585469	6.04548499082357	0	-6.27283446296177	22.5383478594361	0.0632911392405063	2.02061855670103	219.116501517146	6.04548499082357	-7.22666666666667	154.659486423371
fb_rec20p_per11	20	20	1	FilterBank	7	110	1	0	234	273	162	0	0	0.145945945945946	0.593406593406593	0	0.229166666666667	0.0625	0.119402985074627	21.4838577531004	38.1978444330865	7.07979116570415	25.4666369059576	-2.10659793344563	30.4062861314003	0.0641189804538959	0.820000065003887	1.48708619426238	12.2133588322701	0.0456672332366551	0.18943463398628	33.3699128930168	0	7.07979116570415	20.6729149161527	0.0486486486486487	-3.42105263157895	173.742068927438	33.3699128930168	26.2797178130511	97.2223432911457
fb_rec20p_per11	20	20	1	FilterBank	7	110	1	1	225	338	221	0	0	0.202312138728324	0.653846153846154	0	0.218181818181818	0.154929577464789	0.178571428571429	22.6093472613067	41.0967185375295	1.67439632228879	24.2286395394648	-1.04844765958544	35.5468270205704	-0.03590942415826	0.828048962779539	-1.15704528505675	18.6196794367198	-0.0126712570513314	0.134386435895331	27.4132534477595	0	1.67439632228879	22.7232783740336	0.046242774566474	-24.5506072874494	164.825864226226	27.4132534477595	-10.0444444444444	99.1835337814367
fb_rec20p_per11	20	20	1	FilterBank	7	110	1	0	221	243	156	0	0	0.163265306122449	0.641975308641975	0	0.19047619047619	0.179487179487179	0	19.639019897162	37.6888876342104	6.74529499492448	23.6831263151041	-4.87458516418652	26.2911502972739	0.0555761918094931	0.463292667869578	0.32717296967669	22.7828685352195	0.000309808224179737	0.175782796145052	35.7430888993763	0	6.74529499492448	20.5097250320644	0.102040816326531	20.2971428571429	171.21715304705	35.7430888993763	51.3945512820513	103.924409103059
fb_rec20p_per11	20	20	1	FilterBank	7	110	1	2	166	283	218	0	0	0.212765957446809	0.770318021201413	0	0.210526315789474	0.0512820512820513	0.233333333333333	23.7633290682819	41.6233760954688	0.787036090601619	22.6621687375687	0.639521251191358	40.0119379750767	0.0841471054777261	0.760286918094166	-2.97808339762478	13.0578055999347	0.0402760062152585	0.146906326283973	32.0255454445302	0	0.787036090601619	25.4674038246821	0.0354609929078014	-2.42364532019704	232.521515735029	32.0255454445302	28.4545454545455	122.377124809062
fb_rec20p_per11	20	20	1	FilterBank	7	110	1	1	242	320	189	0	0	0.169590643274854	0.590625	0	0.288888888888889	0.0697674418604651	0.121951219512195	21.5628065701011	38.9365471483579	5.46198855942762	22.884648930465	-0.709663176910529	31.8571878343416	-0.0691819923793439	0.605190227748241	1.07640444349273	24.4471932246288	-0.0246191347595449	0.134616905306605	28.2513578997745	0	5.46198855942762	22.1146785093925	0.0233918128654971	7.78688524590164	170.195009405307	28.2513578997745	34.5183520599251	87.3500734319472
fb_rec20p_per11	20	20	1	FilterBank	7	110	1	1	184	314	256	0	0	0.273885350318471	0.815286624203822	0	0.414285714285714	0.0212765957446809	0.166666666666667	23.8819293198507	42.6233898305646	-4.96482478124172	21.342039437183	-1.32745545464802	47.0743753899918	0.0528447855374472	1.10290968056962	0.094666866836398	5.55129438322021	0.0133515612434251	0.147680197526903	26.3552738636762	0	-4.96482478124172	26.468081423956	0.0573248407643312	10.2380952380952	206.533306829246	26.3552738636762	30.2857142857143	136.779589430061
fb_rec20p_per11	20	20	1	FilterBank	7	110	1	2	218	254	167	0	0	0.263157894736842	0.65748031496063	0	0.184210526315789	0.326923076923077	0.0476190476190476	19.0817705749409	36.9438778362737	1.65395707911262	21.3679991714563	-1.09612206602589	27.974382766161	-0.0185498173882259	0.642689144281809	3.31447128451195	34.3739359782361	0.183988248752537	1.02949139502781	17.5347498420591	0	1.65395707911262	20.3016998349809	0.12781954887218	1.32631578947368	159.132066685915	17.5347498420591	11.6312056737589	112.853830463189
fb_rec20p_per11	20	20	1	FilterBank	7	110	1	1	242	129	70	0	0	0.260869565217391	0.542635658914729	0	0.0882352941176471	0.285714285714286	0.254237288135593	16.1864776139578	33.3191323399371	6.39018220028472	21.2096031030736	3.37549969283833	29.9309569875815	-0.0730006594212578	0.492088526307131	5.18714290872266	19.6250196389999	-0.0189401252725013	0.205549777445841	18.8821998209565	0	6.39018220028472	18.0342736148509	0.0260869565217391	45.5094339622642	144.416807179314	18.8821998209565	34.0344827586207	80.7547653294341
fb_rec20p_per11	20	20	1	FilterBank	7	110	1	1	232	294	151	0	0	0.160220994475138	0.513605442176871	0	0.181818181818182	0.156862745098039	0.101449275362319	18.4572967051172	35.9525394413437	12.3601876452037	23.2977152816257	-1.27653761804694	21.34820534614	0.0103685472693455	0.254903609775575	-3.38625395113354	13.5008383961323	0.00609645859914478	0.189354949924412	31.7776837132764	0	12.3601876452037	17.4046879063236	0.0497237569060773	25.7469387755102	174.756086577602	31.7776837132764	52.0119565217391	96.8165999779727
fb_rec20p_per11	20	20	1	FilterBank	7	110	1	1	207	183	113	0	0	0.140350877192982	0.617486338797814	0	0.116279069767442	0.0909090909090909	0.103448275862069	19.0369553792432	36.1314347535347	5.31362860747604	24.1705287458866	4.08335139202767	32.0627086521309	-0.0892164189453136	0.610463630219334	-5.70118656131544	23.9671213346735	0.00197471216308424	0.135970175425792	28.4082523294965	0	5.31362860747604	22.374488817389	0.0350877192982456	-29.4545454545455	180.740601893585	28.4082523294965	-12.2777777777778	67.0231368023332
fb_rec20p_per11	20	20	1	FilterBank	7	110	1	2	260	414	264	0	0	0.191304347826087	0.63768115942029	0	0.157894736842105	0.186666666666667	0.131868131868132	22.8253605857022	40.1628030274054	6.28278979593632	23.4598795439198	1.66138535490838	31.2100692608768	0.0186185781913644	0.497085578322035	2.81500251174612	32.3182095992297	0.00234516964634282	0.159244288715956	29.7849279337574	0	6.28278979593632	21.9906587366954	0.0304347826086957	15.5744680851064	138.436785375455	29.7849279337574	38.671186440678	86.5728910804436
fb_rec20p_per11	20	20	1	FilterBank	7	110	1	2	258	484	305	0	0	0.185483870967742	0.630165289256198	0	0.224137931034483	0.19672131147541	0.0636363636363636	24.708100287492	42.9506844458555	4.72530341056069	26.3143076788654	2.96331145513532	34.290203687953	0.00909150628076694	0.724566830413656	-0.265381003539065	13.8322560736299	0.0124921552305585	0.15457966474605	36.164203878932	0	4.72530341056069	23.4992492673144	0.032258064516129	41.8422391857506	175.021122769172	36.164203878932	66.1385649087221	57.0133345960832
fb_rec20p_per11	20	20	1	FilterBank	7	110	1	1	282	414	261	0	0	0.143497757847534	0.630434782608696	0	0.176470588235294	0.176470588235294	0.0892857142857143	24.2870424379383	42.5518150414969	5.4200281605823	25.2533589944651	2.18829100211913	31.2488525014623	-0.00661827842344608	0.656257662498721	1.66752220877264	21.6238570784956	0.00287523708566401	0.164236270633214	31.8117739703892	0	5.4200281605823	23.3784252347646	0	8.07920792079208	160.502502497562	31.8117739703892	38.25	57.496122430023
fb_rec20p_per11	20	20	1	FilterBank	7	110	1	4	266	493	292	0	0	0.163424124513619	0.592292089249493	0	0.304347826086957	0.195121951219512	0.0521739130434783	23.7716461992402	40.8623520048359	7.54496432828827	26.7089033155934	-1.00115920455575	30.9864223679134	-0.0266605534792257	0.650794890045691	-1.27312228949329	12.378900074099	-0.011562140506519	0.16732259722286	35.0063175625998	0	7.54496432828827	22.6123886230891	0.0155642023346304	-4.78048780487805	139.548332163247	35.0063175625998	8.45633946830266	68.14036311231
fb_rec20p_per11	20	20	1	FilterBank	7	110	1	1	330	563	316	0	0	0.207746478873239	0.561278863232682	0	0.352941176470588	0.246153846153846	0.114864864864865	22.6624440929905	41.1099764833209	7.19642683481458	25.066824520837	-0.413064074639924	31.2133226133551	0.00709792794043938	0.62086513081394	-0.180033706399028	13.013484553051	-0.00119599602417366	0.252703610729595	32.0850771880577	0	7.19642683481458	21.247553691912	0.0316901408450704	47.8190476190476	123.79521784344	32.0850771880577	37.0610784564273	82.9843563394085
fb_rec20p_per11	20	20	1	FilterBank	7	110	1	3	342	574	337	0	0	0.113636363636364	0.587108013937282	0	0.263157894736842	0.166666666666667	0.050761421319797	24.6438508431688	41.1637820426599	7.95892002330276	26.4710130425351	3.73467160991678	34.6224608135577	0.0203736646789716	0.48367722700913	-0.237104491072494	7.21542700930691	0.0121558563320568	0.148960068618929	35.3353232935658	0	7.95892002330276	22.3168922871577	0.025974025974026	46.2997762863535	158.973076590559	35.3353232935658	47.7915269734837	59.3999296410152
fb_rec20p_per11	20	20	1	FilterBank	7	110	1	4	269	521	353	0	0	0.211618257261411	0.677543186180422	0	0.361702127659574	0.166666666666667	0.12	24.3951586449036	43.0056497810066	3.54433259102249	25.8908732102841	0.528710580895828	34.0073806328672	0.00389387617020531	0.917624002524399	1.33285348418228	19.2319788429724	-0.0120334240486993	0.213361142820648	31.85257958325	0	3.54433259102249	22.8220804752635	0.024896265560166	16.6535211267606	167.239943860049	31.85257958325	51.1666666666667	85.2630647454699
fb_rec20p_per11	20	20	1	FilterBank	7	110	1	0	211	225	183	0	0	0.21978021978022	0.813333333333333	0	0.106382978723404	0.304347826086957	0.1875	19.9272142106157	38.8691118101202	-4.07385332941528	19.2094134291339	-1.24220922024571	41.7054073655844	-0.0624818200842245	0.780604827273623	1.69558668027013	5.21001065817777	-0.0493488479841774	0.127365687882131	30.2139226261972	0	-4.07385332941528	24.3817978455929	0.0879120879120879	8	208.029649799087	30.2139226261972	38.030612244898	151.778076638574
fb_rec20p_per11	20	20	1	FilterBank	7	110	1	2	277	353	177	0	0	0.0985915492957746	0.501416430594901	0	0.209302325581395	0.102040816326531	0.0442477876106195	21.1436432419424	37.628895772637	13.094153167627	25.4674466879201	-0.631234390972482	26.2288751452982	0.00158547551256354	0.312993544484136	-0.508403771738566	8.49345850543554	0.0394067569410706	0.26628868837189	36.2798599676774	0	13.094153167627	18.4711541574444	0.0563380281690141	28.6060606060606	122.704613476644	36.2798599676774	38.2570921985816	67.6289637289802
fb_rec20p_per11	20	20	1	FilterBank	7	110	1	1	217	397	303	0	0	0.213930348258706	0.763224181360202	0	0.378787878787879	0.152173913043478	0.145161290322581	24.9539342280305	43.9493937478743	-1.04559201845128	23.7173583238949	-3.87094599074808	47.3609061924275	-0.053314968989902	0.866929364385492	2.5079985645952	18.8052300680694	-0.00235186463196483	0.136608293400537	31.1490592514978	0	-1.04559201845128	25.7751254207393	0.0398009950248756	4.07017543859649	185.224783466415	31.1490592514978	33.3877551020408	63.8156767910023
fb_rec20p_per11	20	20	1	FilterBank	7	110	1	0	173	359	301	0	0	0.276729559748428	0.838440111420613	0	0.338709677419355	0.274193548387097	0	25.4015234737889	43.0326508067237	-6.67737881564455	20.6538552191349	-0.244004083129737	52.6197314481931	-0.0332266099017261	1.27764094947064	-11.4203891972491	42.8204235774808	-0.0112585389089742	0.190589808036714	13.7979693669852	0	-6.67737881564455	26.659723207468	0.0628930817610063	62.304347826087	236.735790087389	13.7979693669852	14.0493079584775	156.370400770438
fb_rec20p_per11	20	20	1	FilterBank	7	110	1	0	187	309	207	0	0	0.239766081871345	0.669902912621359	0	0.285714285714286	0.28125	0.0227272727272727	23.7739920816276	41.0552691308815	2.72780695577408	21.6469993833349	2.47153628450702	35.0156379266642	-0.103199387423759	0.83105066002223	2.23155896659009	53.4910729559334	0.00699517709484968	0.12897325541648	19.4508690205314	0	2.72780695577408	23.4756560963154	0.0350877192982456	-42.7376425855513	168.661150172847	19.4508690205314	14.3174473067916	123.28956329595
fb_rec20p_per11	20	20	1	FilterBank	7	110	1	2	247	205	101	0	0	0.0534351145038168	0.492682926829268	0	0.0769230769230769	0.0740740740740741	0	17.4707474547997	33.1237328347649	14.5223408066085	24.7180189051363	2.31345108140705	19.0498608829343	0.000614339693383185	0.326377040302497	2.55273050203005	17.6357656509748	-0.024262375852133	0.137298327575429	38.7960773483453	0	14.5223408066085	17.5688277778189	0.0229007633587786	18.5555555555556	193.644091333888	38.7960773483453	52.3943661971831	80.2315361711233
fb_rec20p_per11	20	20	1	FilterBank	7	110	1	3	278	368	198	0	0	0.182608695652174	0.53804347826087	0	0.275	0.222222222222222	0.08	22.7951316225621	40.4603474718731	8.90243336901172	24.9046923593147	-1.26952224071681	26.1387088939546	0.0248160286044849	0.615823235846379	2.24773124255301	17.091232414457	-0.0017819043954172	0.134380651378258	28.0104254248281	0	8.90243336901172	20.3966069103385	0.0391304347826087	27.5016393442623	137.837292634195	28.0104254248281	43.3691014867485	71.5357048791278
fb_rec20p_per11	20	20	1	FilterBank	7	110	1	2	204	303	205	0	0	0.2	0.676567656765677	0	0.305084745762712	0.222222222222222	0.0350877192982456	23.1839944394501	41.2883847666896	5.48059331173165	26.009159128362	-1.49115890834725	31.8865657544891	0.00496158501002079	1.02590816215786	3.86734843438207	29.2125627731192	-0.0032048334568411	0.217318808132455	35.0074155805416	0	5.48059331173165	23.6169879858644	0.00555555555555556	-31.3939393939394	186.880607683962	35.0074155805416	14.1370958259847	99.619671964708
fb_rec20p_per11	20	20	1	FilterBank	7	110	1	1	225	395	264	0	0	0.27807486631016	0.668354430379747	0	0.436363636363636	0.24	0.0769230769230769	24.0276237458845	42.2620679242636	2.56860075184737	26.3737813821603	-1.18962896443368	38.1088280158956	0.0258762361995725	1.15776435731419	-4.93505416612844	28.8175953752119	0.0670321010869822	0.518096756110797	29.0913478856781	0	2.56860075184737	24.240436897621	0.0213903743315508	-21.7638888888889	173.402915878015	29.0913478856781	22.4369636963696	103.606952603892
fb_rec20p_per11	20	20	1	FilterBank	7	110	1	1	296	411	262	0	0	0.21875	0.637469586374696	0	0.342105263157895	0.25	0.160377358490566	24.7340674778052	42.8291193687034	5.20869853896774	23.2725705412715	0.87194353262837	32.2516089152568	-0.0351684507494226	0.529341423517074	-0.25301269244082	45.2536103086209	-0.0318028128934713	0.369298448949716	24.0945648779433	0	5.20869853896774	25.8091977904655	0.00892857142857143	-3.64590163934426	170.468797860498	24.0945648779433	20.863025210084	111.955101389206
fb_rec20p_per11	20	20	1	FilterBank	7	110	1	0	157	251	205	0	0	0.2	0.816733067729084	0	0.181818181818182	0.169230769230769	0.333333333333333	24.8861607123491	42.992308706238	-5.02572836065681	21.6307786400266	2.4391770038607	44.2330290456682	-0.10960213826583	1.22834633693652	11.1604177558525	36.480027114259	-0.00324496567390216	0.156839486123112	23.7432490793138	0	-5.02572836065681	26.4168440152302	0.0296296296296296	4.9438202247191	216.623934571855	23.7432490793138	-56.9771626297578	189.080504287373
fb_rec20p_per11	20	20	1	FilterBank	7	110	1	2	392	484	213	0	0	0.100303951367781	0.440082644628099	0	0.166666666666667	0.128205128205128	0.0666666666666667	22.2234288289449	38.4998591688698	13.3205013808342	24.2823673022131	-0.948850131338482	24.6602786422279	-0.0112493504596872	0.761418084083642	0.0728163015568207	6.26788802261365	-0.00173227638718153	0.117564214890006	32.2403431430758	0	13.3205013808342	17.377597813619	0.0151975683890578	12.1065375302663	140.80692654821	32.2403431430758	48.5695473251029	51.9645355324189
fb_rec20p_per11	20	20	1	FilterBank	7	110	1	2	251	504	384	0	0	0.283333333333333	0.761904761904762	0	0.256410256410256	0.253333333333333	0.277777777777778	24.4825247136542	42.2886467206291	-3.3459472406929	24.7893923724895	2.04506397645943	49.9534359489156	-0.0424834144123523	0.899814108937882	0.819575007520087	28.995883379035	-0.0327063250459756	0.148303242630213	25.9887426385919	0	-3.3459472406929	24.6895574093514	0.025	16.1302931596091	163.652377359063	25.9887426385919	11.3539100346021	98.625963215777
fb_rec20p_per11	20	20	1	FilterBank	7	110	1	1	222	274	222	0	0	0.328859060402685	0.81021897810219	0	0.30952380952381	0.242424242424242	0.157894736842105	20.1227078476536	38.3932168211008	-3.39918723376496	19.9531873230559	-0.915379873774955	48.2160868391333	-0.00235816545852943	0.69382736501879	5.52437676641698	21.2788632728916	0.0335088065688081	0.109687055589267	27.6171096641556	0	-3.39918723376496	23.6973986349787	0.0402684563758389	-15.7471264367816	179.705682206013	27.6171096641556	27.43	132.085348039314
fb_rec20p_per11	20	20	1	FilterBank	7	110	1	0	191	228	174	0	0	0.221374045801527	0.763157894736842	0	0.264150943396226	0.344827586206897	0.107142857142857	20.1281572502868	36.5415389392838	-0.226674103298578	18.1313220548223	-0.494111842863815	40.9872340516741	0.0305796126493474	0.515994798226667	-3.58567827579224	49.0246106266071	0.0319931302184159	0.178588870070169	3.50579996338996	0	-0.226674103298578	20.5316521972685	0.0305343511450382	64.2430939226519	211.823895722988	3.50579996338996	43.8946666666667	177.182108512264
fb_rec20p_per11	20	20	1	FilterBank	7	110	1	4	350	629	386	0	0	0.197916666666667	0.613672496025437	0	0.382978723404255	0.191176470588235	0.125748502994012	24.1921765161339	41.6624221855803	2.9233548074942	25.2836145896937	1.10408197066705	33.2210365204054	-0.0647722495044852	0.91802210550761	-0.994033597047577	11.9582576724741	0.00687671421378545	0.154413302817365	27.9126742201043	0	2.9233548074942	22.4422969315755	0.0277777777777778	7.94570135746606	143.002582289868	27.9126742201043	18.3527830487034	86.9122676915932
fb_rec20p_per11	20	20	1	FilterBank	7	110	1	1	325	472	229	0	0	0.0984251968503937	0.485169491525424	0	0.173913043478261	0.2	0.0518518518518519	17.9864109098117	34.9513991784636	12.2203556890578	22.9090850511797	-0.145010504986614	22.3164725693321	-0.0221623387730751	0.557334411478125	0.265799669942554	9.16041493860592	0.00756185873997541	0.100389896024954	33.2380183701781	0	12.2203556890578	15.3846131181687	0.0118110236220472	22.9556135770235	108.519960349797	33.2380183701781	39.7221668328348	59.9987947207485
fb_rec20p_per11	20	20	1	FilterBank	7	110	1	4	328	303	144	0	0	0.145833333333333	0.475247524752475	0	0.27027027027027	0.155555555555556	0.0535714285714286	18.826178344738	36.9054545668555	14.5291511944655	28.9907128826373	0.532887662378983	24.5995607094118	0.0923971079563063	0.644935510700064	-1.64644640142667	17.3561365528439	0.0214176598617995	0.245709706318031	37.1796218248404	0	14.5291511944655	18.9602488336695	0.0208333333333333	23.2295081967213	116.007647462208	37.1796218248404	35.1555306007861	82.6886858446826
fb_rec20p_per11	20	20	1	FilterBank	7	110	1	3	260	304	191	0	0	0.147959183673469	0.628289473684211	0	0.148936170212766	0.191489361702128	0.0875	20.8797901121631	38.1381932910546	6.2517593619529	27.3984863669096	2.41922304333954	38.8768434564831	-0.0270159994493258	0.724213967023373	-1.04314133382142	12.0308039153932	-0.0203236659426549	0.152701279012248	37.4662439351746	0	6.2517593619529	21.2259247676952	0.0459183673469388	5.27272727272727	153.737287367024	37.4662439351746	35.358024691358	58.9557691498413
fb_rec20p_per11	20	20	1	FilterBank	7	110	1	1	264	231	102	0	0	0.0971428571428571	0.441558441558442	0	0.104166666666667	0.0731707317073171	0.06	18.0492976200514	35.514544439526	15.4113696174422	24.454360012365	1.81872731927491	20.6731512589645	-0.0225936822389876	0.604841009027826	0.912214121112567	13.0112701125475	0.077157988657479	0.645252423905521	35.419045212124	0	15.4113696174422	18.3577435188129	0.0342857142857143	38.4909090909091	140.106596434524	35.419045212124	59.8130841121495	57.956087938005
fb_rec20p_per11	20	20	1	FilterBank	7	110	1	1	209	238	137	0	0	0.145569620253165	0.57563025210084	0	0.159090909090909	0.134615384615385	0.175	18.1470465785912	35.3052600410349	5.97922868756584	23.7437442397421	-2.63938236332988	34.7989765163487	-0.00504263825738618	0.350397241175261	0.840182011562678	23.5035650890821	-0.00313374051372007	0.110215559878329	30.3396027358301	0	5.97922868756584	16.8272434567906	0.0443037974683544	-10.957345971564	158.496426519935	30.3396027358301	-24.6756756756757	97.0185843103887
fb_rec20p_per11	20	20	1	FilterBank	7	110	1	1	234	292	198	0	0	0.192546583850932	0.678082191780822	0	0.176470588235294	0.183673469387755	0.164179104477612	20.9327259709727	39.4176516711583	4.71507029345602	22.9792436322172	-0.674630802625361	30.9067906801188	0.00118182168558922	0.4814416049179	0.512150158782239	13.7728923847594	0.0186385211711229	0.196607238751534	28.2886287809618	0	4.71507029345602	21.4694897287	0.0496894409937888	-18.8245614035088	209.436804915256	28.2886287809618	23.0298221614227	114.313450322885
fb_rec20p_per11	20	20	1	FilterBank	7	110	1	2	284	526	331	0	0	0.188461538461538	0.629277566539924	0	0.311111111111111	0.186666666666667	0.140495867768595	22.2058845420274	38.6914066373817	5.31017157082838	23.9057090777088	-1.11393963793595	31.5368578954157	0.0273093450111848	0.640194250124897	-0.461279875713681	24.0079089709935	0.0118729778446066	0.162842873852856	27.8460062214709	0	5.31017157082838	21.0481724670185	0.0269230769230769	23.2896174863388	160.194328055718	27.8460062214709	33.7069196710942	83.4014093965399
fb_rec20p_per11	20	20	1	FilterBank	7	110	1	0	265	475	266	0	0	0.154440154440154	0.56	0	0.244897959183673	0.166666666666667	0.135922330097087	20.3477255356026	36.7634914856813	7.83943547960722	20.7521479293132	0.40741869790787	24.0603565812471	-0.00915914556593019	0.481807600266792	3.32821023444032	22.8581496405414	0.0149944434260761	0.362121811927148	26.3536692215351	0	7.83943547960722	20.6087622225337	0.0386100386100386	23.2171581769437	161.202832646305	26.3536692215351	36.4663934426229	84.1387221423332
fb_rec20p_per11	20	20	1	FilterBank	7	110	1	3	255	519	354	0	0	0.172995780590717	0.682080924855491	0	0.288888888888889	0.164383561643836	0.1	21.5307518428127	38.8429184781849	4.76192253183932	23.8281169792917	3.16160377968463	30.6031020389538	-0.0299712866554965	0.641969335398562	-2.45166934746499	25.2273624068395	0.00466531058680743	0.365793109545085	32.9973635675163	0	4.76192253183932	19.4888008987498	0.0379746835443038	34.3381088825215	160.967585292208	32.9973635675163	43.2131268436578	98.5926387965033
fb_rec20p_per11	20	20	1	FilterBank	7	110	1	1	278	451	250	0	0	0.114503816793893	0.554323725055432	0	0.218181818181818	0.1	0.0699300699300699	22.6265696672338	39.7355916104201	8.22712595148358	24.1784166096432	0.0952491193995274	24.8628339936823	-0.00732930043312293	0.742489122189628	0.581873557917459	15.2978886300782	0.00143770430969388	0.350501704058611	30.9111729785927	0	8.22712595148358	18.9577054910369	0.0267175572519084	-11.7462235649547	143.491977209788	30.9111729785927	32.9333333333333	91.3417413135388
fb_rec20p_per11	20	20	1	FilterBank	7	110	1	4	440	721	294	0	0	0.109048723897912	0.407766990291262	0	0.3	0.133333333333333	0.0474683544303797	22.2644066067153	39.7631196205908	15.0840440126281	24.5437037321332	-0.89978175063722	20.2264659550747	0.00599497610512858	0.38965024781851	0.271215513631378	8.47292785766822	-0.00391265202550286	0.134370949359273	35.4960098855248	0	15.0840440126281	14.6072668330463	0.0162412993039443	47.8862876254181	119.707350210432	35.4960098855248	73.4611764705882	61.4926047195109
fb_rec20p_per11	20	20	1	FilterBank	7	110	1	0	169	195	164	0	0	0.221052631578947	0.841025641025641	0	0.203703703703704	0.137931034482759	0.181818181818182	18.1586473760347	36.0645370622888	-2.47846404407485	20.0835525411386	1.68333328199042	33.8109086088808	-0.0838726250401578	0.692920518814305	-4.94795361596307	18.2585997479838	-0.0179724479777093	0.199572855809003	19.7619500845293	0	-2.47846404407485	22.4512444064329	0.0526315789473684	-12.8296296296296	230.488693695599	19.7619500845293	-1.97385620915033	125.412144844854
fb_rec20p_per11	20	20	1	FilterBank	7	110	1	3	260	238	140	0	0	0.153846153846154	0.588235294117647	0	0	0.121951219512195	0.160714285714286	17.3117319512689	35.2115794456597	7.07838137315827	25.4382717595543	2.5039089008259	37.1389221763869	0.0317266471831369	0.515636229529336	-2.43279554384635	25.074112842252	-0.0015694963726639	0.112828978528632	30.8471534980432	0	7.07838137315827	18.9314183590464	0.027972027972028	42.4719101123596	142.455630113847	30.8471534980432	49.9595588235294	92.7433930773721
fb_rec20p_per11	20	20	1	FilterBank	7	110	1	1	294	507	265	0	0	0.152892561983471	0.522682445759369	0	0.236842105263158	0.140625	0.0826446280991736	21.013172588181	37.3082203652514	10.3211856016167	23.2221184567649	0.524872070686423	26.5647345647856	-0.0125257027250431	0.345792705077148	-2.19082191891471	21.331862456569	-0.0182314815677521	0.164507778308714	33.7993094992699	0	10.3211856016167	18.6961156585806	0.0495867768595041	7.53061224489796	140.403015398986	33.7993094992699	30.6137931034483	64.5681365138685
fb_rec20p_per11	20	20	1	FilterBank	7	110	1	3	369	500	221	0	0	0.108974358974359	0.442	0	0.142857142857143	0.192307692307692	0.0646766169154229	19.9099384893335	38.193919851193	13.0685622096415	25.7554585314627	-0.464242130356256	23.758590679977	-0.0125157876935139	0.809954638339856	0.559384575880835	9.32625833109658	-0.00015731248958843	0.129687605233904	34.7793244605568	0	13.0685622096415	17.5413995141908	0.0224358974358974	47.0877192982456	124.527689901977	34.7793244605568	66.256880733945	65.9967774202397
fb_rec20p_per11	20	20	1	FilterBank	7	110	1	3	426	661	246	0	0	0.0588235294117647	0.372163388804841	0	0.178571428571429	0.0625	0.0126582278481013	17.7486467672935	34.0483168140018	16.5473919836407	23.3577358763403	0.116826492648725	21.0038599744437	0.00942583694664888	0.331373424567066	-0.112947347144057	2.6896368768948	-0.0182068701245798	0.14520793043911	38.0319904826569	0	16.5473919836407	14.5974030533264	0.0140056022408964	36.8683760683761	109.205528117867	38.0319904826569	62.4286738351254	62.1111121619179
fb_rec20p_per11	20	20	1	FilterBank	7	110	1	0	358	538	276	0	0	0.19016393442623	0.513011152416357	0	0.454545454545455	0.241935483870968	0.104395604395604	21.3182129202803	39.5792436767632	9.76907307165022	24.3170482523846	0.513938279802763	26.9995267623997	0.0145828904446183	0.401176345093726	-0.994416766286789	20.366853885378	0.0106210810729416	0.17063584264348	29.5677328819419	0	9.76907307165022	20.7341585643339	0.019672131147541	30.6534653465347	142.741428281221	29.5677328819419	55.6751269035533	75.276199185977
fb_rec20p_per11	20	20	1	FilterBank	7	110	1	0	277	444	278	0	0	0.167300380228137	0.626126126126126	0	0.196428571428571	0.166666666666667	0.170542635658915	22.4503076708696	39.262178646662	3.87863471575934	23.5304612532647	-2.37720429838309	34.5672683639382	-0.0199946327469177	0.825587715814461	3.85206610367444	32.2258257810492	-0.0234683598612722	0.182535637621342	22.8785929680265	0	3.87863471575934	21.0580099295396	0.0456273764258555	9.53513513513514	162.064124978341	22.8785929680265	32.0162601626016	74.1608778198702
fb_rec20p_per12	20	20	1	JAR_FilterBank	7	110	1	1	261	301	160	0	0	0.0729166666666667	0.53156146179402	0	0.108108108108108	0.0327868852459016	0.0659340659340659	19.7510368091779	38.1645072505676	10.6254069303969	26.1915913225791	1.37829836781465	27.7653692839319	0.0457451000784693	0.747386257465607	0.156252680302663	10.1341549874404	-0.00971729171332744	0.102579994906703	35.2132420887015	0	10.6254069303969	18.4594490866708	0.0364583333333333	15.6697247706422	153.116085297667	35.2132420887015	33.196261682243	60.929194794827
fb_rec20p_per12	20	20	1	JAR_FilterBank	7	110	1	1	274	598	384	0	0	0.214022140221402	0.642140468227425	0	0.264150943396226	0.183098591549296	0.162790697674419	24.433486859949	41.7924418396381	4.0641406710796	23.7737838590022	-1.03332517214305	36.5465999938885	0.00692104603989194	0.59439888638	-3.84915141203096	34.6300975961108	-0.0534409136610465	0.416050756906527	26.0589337150103	0	4.0641406710796	21.7941761315412	0.025830258302583	22.695652173913	161.99781521988	26.0589337150103	26.6570251030348	79.8099904223666
fb_rec20p_per12	20	20	1	JAR_FilterBank	7	110	1	1	201	265	190	0	0	0.206666666666667	0.716981132075472	0	0.269230769230769	0.166666666666667	0.0975609756097561	22.6836825793742	39.9213626254717	1.55196473986754	21.9972715967643	6.78063919875424	36.9588693696657	-0.0337045803420979	0.442117826691722	5.15523496831608	20.9454999670401	-0.0821110880165879	0.18867992347617	24.2724356718319	0	1.55196473986754	22.3596814996169	0.08	6.15686274509804	202.708106049288	24.2724356718319	48.1233211233211	101.597018547349
fb_rec20p_per12	20	20	1	JAR_FilterBank	7	110	1	2	300	511	262	0	0	0.154385964912281	0.512720156555773	0	0.217391304347826	0.14	0.09375	21.8056087127187	38.6628350605333	9.40013709929253	23.1696961367006	-1.43316918389432	21.6806779622379	-0.0442660628024465	0.570777851764015	-0.331103247469087	12.3416354502474	-0.0159380456737822	0.150762372680787	30.3266255488949	0	9.40013709929253	18.1358349799547	0.0245614035087719	5.38248847926267	149.967960449759	30.3266255488949	46.2508403361345	73.0704431850346
fb_rec20p_per12	20	20	1	JAR_FilterBank	7	110	1	3	292	399	266	0	0	0.186363636363636	0.666666666666667	0	0.183673469387755	0.115384615384615	0.0581395348837209	22.4109446956622	40.0297020708803	4.60866138263181	26.1998373567899	-1.10771647052112	33.8702474303863	0.0854590377355787	0.839333781816768	-0.649272176552559	20.7303992300547	0.00487663978857092	0.149630863946212	38.4114287045784	0	4.60866138263181	21.9367342676374	0.0136363636363636	23.6769230769231	169.912137884656	38.4114287045784	53.3828571428571	62.3926259854921
fb_rec20p_per12	20	20	1	JAR_FilterBank	7	110	1	2	275	375	277	0	0	0.18974358974359	0.738666666666667	0	0.222222222222222	0.102040816326531	0.157894736842105	20.6884660360093	38.1550642838305	-0.475578856017987	21.3505767003606	2.10159991342991	39.3217410007481	-0.0190011333034797	0.713122193656284	-1.42358387179236	22.2795635236888	0.00371107342944935	0.134481449360283	26.3503066244575	0	-0.475578856017987	21.9369253074991	0.102564102564103	-12.5365853658537	169.207434230606	26.3503066244575	21.436862745098	96.2943380038745
fb_rec20p_per12	20	20	1	JAR_FilterBank	7	110	1	1	225	290	198	0	0	0.257731958762887	0.682758620689655	0	0.296296296296296	0.259259259259259	0.206896551724138	22.8447370328347	40.4184067958589	4.95239057899712	24.2015613234511	2.5960677149863	29.9947613057463	-0.011006452027637	0.684075046398662	-2.68468083118437	18.5764318927623	-0.00868193142394271	0.167693032356947	23.2297033224246	0	4.95239057899712	23.1633951434691	0.0412371134020619	23.725321888412	181.46205099377	23.2297033224246	37.0324590964591	85.1531014446473
fb_rec20p_per12	20	20	1	JAR_FilterBank	7	110	1	1	172	336	233	0	0	0.230769230769231	0.693452380952381	0	0.277777777777778	0.15625	0.36	23.5388903129015	40.377076191194	4.41121429299742	20.5332392957282	2.24396267405631	32.5000827407341	0.0105977422654998	0.463736235372725	14.2289911386789	47.7808650671634	0.0399199224809278	0.14005996692685	21.3855482708728	0	4.41121429299742	22.745023692235	0.0705128205128205	-13.0543933054393	175.232166439234	21.3855482708728	-3.83813700918964	98.173701671109
fb_rec20p_per12	20	20	1	JAR_FilterBank	7	110	1	1	248	347	211	0	0	0.163366336633663	0.60806916426513	0	0.0980392156862745	0.211538461538462	0.0833333333333333	21.0387702129607	38.5735443240888	5.00766127700131	24.0089079071867	2.05198414318644	33.9093456669874	-0.049428436080035	0.752520739894339	-3.91599622213526	33.4782509816446	-0.0179294236376857	0.404691207319327	30.1602652090743	0	5.00766127700131	20.915730823662	0.103960396039604	10.0965517241379	161.284520422329	30.1602652090743	44.5767167698202	71.6945682112083
fb_rec20p_per12	20	20	1	JAR_FilterBank	7	110	1	4	338	508	252	0	0	0.141935483870968	0.496062992125984	0	0.170731707317073	0.223880597014925	0.0843373493975904	21.0272052842979	37.8459809131244	10.9150921614324	26.7851085698983	2.60799095909796	30.5238075333582	-0.00107708758350956	0.6474193206288	0.441677639009049	12.8015313485856	-0.000642796487238518	0.142278596467755	32.3554024937464	0	10.9150921614324	17.7364114360043	0.0516129032258065	16.9316455696203	128.173196933914	32.3554024937464	35.4541141456583	71.1328644276662
fb_rec20p_per12	20	20	1	JAR_FilterBank	7	110	1	2	324	659	309	0	0	0.15210355987055	0.468892261001517	0	0.2	0.136986301369863	0.0941176470588235	20.5878624443524	38.5516664167276	9.10418813713174	22.1813056368887	0.0212261791089517	24.8433937699037	-0.00429132744488918	0.463251367221176	-1.10173021816271	18.9455403785526	0.00398581225052236	0.217390041341238	28.9700322466984	0	9.10418813713174	16.6749124365145	0.0129449838187702	47.2015209125475	126.231115617598	28.9700322466984	56.4588379469435	70.0258113696139
fb_rec20p_per12	20	20	1	JAR_FilterBank	7	110	1	2	285	351	195	0	0	0.145922746781116	0.555555555555556	0	0.222222222222222	0.1875	0.0571428571428571	22.0481267883093	40.6094930390664	8.73143966503853	27.8622061639129	-1.55940877225796	30.4501767430839	0.0458301079441832	0.870477460474447	2.0098719177786	13.7493672291463	0.0109663421394216	0.192047380817864	35.7717480018547	0	8.73143966503853	21.3839686225709	0.0429184549356223	14	133.294858995495	35.7717480018547	31.1501831501832	60.8423947936515
fb_rec20p_per12	20	20	1	JAR_FilterBank	7	110	1	1	234	528	306	0	0	0.21551724137931	0.579545454545455	0	0.338461538461538	0.191489361702128	0.126126126126126	23.732193033023	39.5690271403383	6.51458536250854	23.410207605132	1.55414728110557	31.7172511675235	0.0155626709938064	0.786751719961219	0.755762287686647	26.6733748955033	-0.00344257264831247	0.113787348178842	29.786691950575	0	6.51458536250854	20.7508086389398	0.0301724137931034	26.8134831460674	169.441780369874	29.786691950575	51.6546762589928	84.8056355994306
fb_rec20p_per12	20	20	1	JAR_FilterBank	7	110	1	2	341	487	259	0	0	0.170418006430868	0.531827515400411	0	0.207547169811321	0.254237288135593	0.103260869565217	23.8284775002167	41.3074618440234	9.40535585705948	24.1466753436822	1.62923916419795	29.5230489411472	0.00477456202042939	0.355747194691135	2.29373780686829	26.9223809962237	0.00306464637852475	0.167153115152336	27.3700108150583	0	9.40535585705948	19.1548342654589	0.0353697749196141	24.0681265206813	144.119852667226	27.3700108150583	38.9944422070076	70.4228626956484
fb_rec20p_per12	20	20	1	JAR_FilterBank	7	110	1	0	228	355	232	0	0	0.192893401015228	0.653521126760563	0	0.369565217391304	0.05	0.269230769230769	21.1384135270062	38.5108181746789	3.49366054756548	20.8102027856413	-4.43037508747402	31.6233279268791	0.00206501509004181	0.3329024853822	2.47225709402486	28.7229737262529	0.0184121414729994	0.159916669372436	28.2910570924788	0	3.49366054756548	22.1161514756891	0.101522842639594	-27.8610038610039	179.515055145229	28.2910570924788	-10.5882352941176	63.5525535193003
fb_rec20p_per12	20	20	1	JAR_FilterBank	7	110	1	1	216	403	291	0	0	0.2	0.722084367245658	0	0.362068965517241	0.138461538461538	0.104477611940299	23.9529070013692	40.89081365261	1.55435976650993	22.518916814089	-3.61492866411841	43.422105640074	0.0184821195621873	0.698341223541038	-1.85684178651528	27.7782459476184	-0.000368508152686581	0.181135672204417	27.7059221040442	0	1.55435976650993	22.8365533604414	0.06	15.0212765957447	180.781713719741	27.7059221040442	35.6514684095861	88.2781841201592
fb_rec20p_per12	20	20	1	JAR_FilterBank	7	110	1	2	317	445	241	0	0	0.161764705882353	0.541573033707865	0	0.272727272727273	0.120689655172414	0.135593220338983	23.5820274652492	41.8696794837624	11.9067874674269	25.1484421927552	0.790998849168293	24.5191988273813	-0.0352805871491037	0.73313754103144	-0.181317063043175	17.1179084654518	-0.00634721644258438	0.096712261749135	32.5327758469847	0	11.9067874674269	21.4591763903094	0.0404411764705882	14.6883468834688	144.453892522572	32.5327758469847	30.0927753743533	83.1824650107313
fb_rec20p_per12	20	20	1	JAR_FilterBank	7	110	1	1	322	459	187	0	0	0.105610561056106	0.407407407407407	0	0.134615384615385	0.0217391304347826	0.127272727272727	20.4354027566214	37.4331278338345	12.5676993043127	22.8780383796801	0.780331399116467	21.6389821387537	0.00279459164562044	0.382455255085765	1.6276316906388	24.8498693803972	-0.00194666830268818	0.14867985337903	27.4458986333869	0	12.5676993043127	16.7291943128252	0.0231023102310231	35.7113402061856	137.634798102969	27.4458986333869	36.1932367149758	94.6595399192562
fb_rec20p_per12	20	20	1	JAR_FilterBank	7	110	1	1	252	516	295	0	0	0.172131147540984	0.571705426356589	0	0.278688524590164	0.191489361702128	0.116666666666667	23.6832047956422	41.7919154954527	6.40149419203301	24.7255124448806	-0.597309520458591	32.5880413305905	-0.00532019273367792	0.918786379840032	0.143547468363839	24.5081725689341	0.0220003461234906	0.242607186980907	30.8319804488972	0	6.40149419203301	20.2924037343523	0.069672131147541	7.963133640553	168.564975788789	30.8319804488972	39.7973466003317	55.2129163205149
fb_rec20p_per12	20	20	1	JAR_FilterBank	7	110	1	4	335	411	189	0	0	0.180451127819549	0.45985401459854	0	0.206896551724138	0.116666666666667	0.167664670658683	20.1051096992233	38.0852609645217	11.8087339332754	24.4997480272413	-0.924072730312066	25.2108171035439	-0.00214939614191352	0.457034791391816	-1.06467367632676	15.5867128806716	0.0178943713953832	0.128576291240297	29.1199507241403	0	11.8087339332754	18.1918569644506	0.037593984962406	33.8636363636364	120.191981455139	29.1199507241403	30.8229166666667	61.3233910014415
fb_rec20p_per12	20	20	1	JAR_FilterBank	7	110	1	2	212	376	281	0	0	0.345945945945946	0.747340425531915	0	0.372549019607843	0.420289855072464	0.171875	24.3664231469174	41.4981521991789	1.85142501637769	24.5090834495467	-6.61999663512045	38.9467539620734	0.0744583481684516	0.916998934286504	-6.71163106082263	25.5103476622286	0.0484025648596757	0.509051626313555	25.7707350074855	0	1.85142501637769	25.5929118384865	0.027027027027027	-4.99248120300752	179.903139399778	25.7707350074855	3.46533074768369	107.209129720361
fb_rec20p_per12	20	20	1	JAR_FilterBank	7	110	1	2	339	625	319	0	0	0.1	0.5104	0	0.3125	0.101449275362319	0.0406091370558376	22.7586818391775	38.6414576591386	9.72889150039602	23.7793571977359	0.152243843725294	25.5834768157751	-0.0157313241771334	0.401255362996932	-1.39927977555992	10.4990471631512	-0.0337091318176002	0.440233025343711	35.0807721704136	0	9.72889150039602	17.3345070119885	0.0363636363636364	40.3745019920319	135.957325652037	35.0807721704136	72.25	70.8966216908075
fb_rec20p_per12	20	20	1	JAR_FilterBank	7	110	1	1	303	609	299	0	0	0.149825783972125	0.490968801313629	0	0.270833333333333	0.212121212121212	0.0786516853932584	21.4455794252554	37.0162344031885	10.0761819704197	23.0980668411672	0.722274863606849	23.4786404090044	0.00994292733656077	0.475294958915165	-1.24044807188123	20.0474277710513	0.000840952299765308	0.127406580007958	32.0794712264884	0	10.0761819704197	17.4609886350441	0.024390243902439	36.5487077534791	132.160175037175	32.0794712264884	50.7582914572864	80.3569497558274
fb_rec20p_per12	20	20	1	JAR_FilterBank	7	110	1	0	337	491	274	0	0	0.13265306122449	0.558044806517312	0	0.173076923076923	0.178571428571429	0.101910828025478	22.4406787484079	39.9323062561724	6.56363945953864	25.4236287310067	-0.883110522922926	27.8263766541591	0.0761217934117614	0.992733863491668	0.135397491823333	8.90923066305575	-0.00776993871314356	0.160577189944415	28.1633469595047	0	6.56363945953864	17.2460659648289	0.054421768707483	22.6271604938272	169.385995870719	28.1633469595047	46.4792751108541	69.2757560936497
fb_rec20p_per12	20	20	1	JAR_FilterBank	7	110	1	2	280	427	260	0	0	0.15979381443299	0.608899297423888	0	0.15625	0.0961538461538462	0.152380952380952	21.1730664255434	37.9793366307903	5.95625708642455	25.06032480529	-2.26958684503749	34.5898512527468	0.00305813695226501	0.70509172677478	2.63014156237792	18.8517174219221	-0.00539545166649721	0.141775344646338	32.302431384537	0	5.95625708642455	21.6753407831037	0.0309278350515464	-3.85542168674699	153.385254949012	32.302431384537	31.9711843711844	80.9405505183616
fb_rec20p_per12	20	20	1	JAR_FilterBank	7	110	1	1	251	298	222	0	0	0.183431952662722	0.74496644295302	0	0.282608695652174	0.13953488372093	0.209302325581395	22.3594947614231	40.1776425263682	1.080007818192	24.0751507896631	-2.94012393115141	38.8308730404202	-0.0455684419370215	0.680400309843951	-1.37265192392298	28.2277656806986	-0.012480977302747	0.115947716310077	31.1323574084033	0	1.080007818192	23.8136028946695	0.0473372781065089	4.42718446601942	188.044551127172	31.1323574084033	20.2857142857143	88.7107074168029
fb_rec20p_per12	20	20	1	JAR_FilterBank	7	110	1	0	182	284	233	0	0	0.24390243902439	0.820422535211268	0	0.220338983050847	0.175	0.137931034482759	19.872629507768	36.8709527745451	-3.86287605043976	19.3253773894181	-3.81703841102011	39.6440552782099	-0.0528931528234128	0.927788104554586	-5.40620794372363	42.9669580129799	-0.000346254675113413	0.0889405674810494	12.748588310245	0	-3.86287605043976	22.2612615648851	0.0569105691056911	-12.3699421965318	196.112098990209	12.748588310245	-27.3435897435897	232.965617946724
fb_rec20p_per12	20	20	1	JAR_FilterBank	7	110	1	1	231	306	256	0	0	0.275590551181102	0.836601307189543	0	0.282608695652174	0.234042553191489	0	22.218043714542	39.2313870203633	-2.23759407624092	18.7598079399321	3.70248860355893	39.0853066159184	0.00593626475416421	0.591051060840927	-1.90405550596577	42.0846344104158	0.0178224743067883	0.138043030978491	26.9152731216386	0	-2.23759407624092	23.1047588607942	0.0551181102362205	-27.9587628865979	181.010629609485	26.9152731216386	-5.71372549019608	106.668926446651
fb_rec20p_per12	20	20	1	JAR_FilterBank	7	110	1	4	290	408	220	0	0	0.172268907563025	0.53921568627451	0	0.268292682926829	0.19047619047619	0.0789473684210526	20.6896261551363	37.9545946397501	12.1045018888156	26.6047690277684	-0.844541298514722	24.9299958045999	-0.0286558453053664	0.912189961046009	-0.674103019348875	16.0829085124228	-0.0242273357112929	0.124972169397629	36.5315395376687	0	12.1045018888156	20.0068455440269	0.0210084033613445	1.9625	149.872584860574	36.5315395376687	7.86815068493151	69.7181159062834
fb_rec20p_per12	20	20	1	JAR_FilterBank	7	110	1	1	219	267	187	0	0	0.170542635658915	0.700374531835206	0	0.194444444444444	0.111111111111111	0.0833333333333333	19.352998792242	35.0432581046155	1.01402552425891	20.060449622178	-4.73527742362885	30.2416130089936	-0.0193525558608598	0.377068816920857	1.67221351375502	29.1295510178459	0.0115002287703498	0.107968601589427	28.6853113283162	0	1.01402552425891	20.856419311431	0.0852713178294574	36.7216494845361	205.050972673031	28.6853113283162	24.5862068965517	124.795695107008
fb_rec20p_per12	20	20	1	JAR_FilterBank	7	110	1	1	319	450	216	0	0	0.113970588235294	0.48	0	0.179487179487179	0.192982456140351	0.0787878787878788	21.132878563255	37.3524847829398	11.9138905086277	24.3497223213737	-2.15697675127446	24.4458217755046	0.0309502232351606	0.39635899202256	-2.09970222249782	22.0486481436	-0.00906107601880493	0.152499305244461	32.0299474261648	0	11.9138905086277	17.644867118496	0.0220588235294118	27.563829787234	117.713782462209	32.0299474261648	38.17143732493	66.1419378311147
fb_rec20p_per12	20	20	1	JAR_FilterBank	7	110	1	1	269	567	338	0	0	0.238493723849372	0.596119929453263	0	0.285714285714286	0.235294117647059	0.186567164179104	22.29158605954	38.4278324226795	5.15859340756947	24.1816778287461	0.495011440968187	36.140667838317	0.0386539477783529	0.684591661328386	-0.382836731411611	32.6482943710307	-0.026584235212578	0.194546810592418	27.947335968366	0	5.15859340756947	21.3029130834035	0.0251046025104603	13.1505617977528	144.641362260197	27.947335968366	30.0686660561661	88.2301567300883
fb_rec20p_per12	20	20	1	JAR_FilterBank	7	110	1	2	285	352	170	0	0	0.126582278481013	0.482954545454545	0	0.313725490196078	0.0465116279069767	0.0573770491803279	22.3079260436096	39.6896991499622	14.33696449787	25.9623648905037	-2.45423528056855	24.3108121127058	-0.0541038541565719	0.704391168007443	1.01522566464905	13.5757942814509	0.00270022995737577	0.164082005353305	37.7782067083377	0	14.33696449787	19.9663399045045	0.029535864978903	11.4788732394366	142.767433920083	37.7782067083377	40.9821029082774	75.8205739709851
fb_rec20p_per12	20	20	1	JAR_FilterBank	7	110	1	1	239	330	227	0	0	0.248554913294798	0.687878787878788	0	0.26530612244898	0.209302325581395	0.176470588235294	21.7277832278964	38.8713471214462	4.20174363350594	23.4647888707515	2.49298924932506	31.9631878364341	0.00863270550542081	0.476534964475159	-1.85432281343653	23.2313843979546	0.0159939916934993	0.10582274531085	30.089957847925	0	4.20174363350594	23.8609189766603	0.0520231213872832	2.44444444444444	176.014466788425	30.089957847925	18.8731934731935	85.4444738931032
fb_rec20p_per12	20	20	1	JAR_FilterBank	7	110	1	1	300	589	360	0	0	0.206349206349206	0.611205432937182	0	0.333333333333333	0.229508196721311	0.158273381294964	23.1360932889764	41.4706351722239	6.85738019108925	25.5725515268921	-1.04055615553862	30.8183767774158	-0.00731241690046923	0.658175627001115	-1.19935522206617	18.182713314907	0.00390703101235165	0.11146468770791	32.1772075591979	0	6.85738019108925	21.6991756133277	0.0357142857142857	39.4513274336283	151.856098947625	32.1772075591979	39.7521164021164	87.9668141081963
fb_rec20p_per12	20	20	1	JAR_FilterBank	7	110	1	3	261	511	313	0	0	0.161572052401747	0.61252446183953	0	0.25	0.196078431372549	0.0754716981132075	22.9717103106848	40.1120094005598	6.76176202065779	25.2732317989727	1.69722814998051	35.2183567258469	0.0503927487465414	0.678376921864798	0.810723255900716	27.5168952582543	-0.0478769766655179	0.475193944996168	34.5393692587519	0	6.76176202065779	21.7179710392682	0.0262008733624454	10.5621621621622	152.290863040112	34.5393692587519	42.1024695734373	75.6077005418533
fb_rec20p_per12	20	20	1	JAR_FilterBank	7	110	1	3	340	435	151	0	0	0.05859375	0.347126436781609	0	0.166666666666667	0.0344827586206897	0.0304878048780488	17.4443925356383	33.8992253664073	19.6846297681636	23.2834986619716	0.111829998342072	13.2728577165676	0.00394606120521645	0.286904939362346	0.184971746232802	11.7923367276793	-0.00265473266530447	0.121463913034893	38.1063240677787	0	19.6846297681636	14.2967966860385	0.0234375	31.1957671957672	113.599178010386	38.1063240677787	46.1675579322638	53.1498453668754
fb_rec20p_per12	20	20	1	JAR_FilterBank	7	110	1	1	302	588	391	0	0	0.222602739726027	0.664965986394558	0	0.333333333333333	0.215384615384615	0.191780821917808	26.4011870142913	43.0643398431082	3.10748126396021	27.0687846852517	-0.354602465473667	36.4082155649631	-0.0606978664843296	0.967935797701921	0.536417872202085	23.1631479760405	-0.0250699939353217	0.354877874341867	27.2998322370438	0	3.10748126396021	24.2184374599308	0.0136986301369863	6.89559164733179	145.851679213365	27.2998322370438	25.9124744376278	86.3601472640693
fb_rec20p_per12	20	20	1	JAR_FilterBank	7	110	1	1	257	407	293	0	0	0.153191489361702	0.71990171990172	0	0.172413793103448	0.192307692307692	0.136363636363636	23.0269804720786	38.3467876928639	0.0819993703218007	21.1106971326412	-1.75122923814326	33.6212806571554	-0.0439608986144711	0.94780916209472	-3.46062899417989	29.2656811242908	-0.00300565936545281	0.143081804164824	22.9175099781466	0	0.0819993703218007	22.3762728646653	0.051063829787234	3.30666666666667	181.60120027695	22.9175099781466	25.4272247360483	100.543596307094
fb_rec20p_per12	20	20	1	JAR_FilterBank	7	110	1	3	284	463	265	0	0	0.153846153846154	0.572354211663067	0	0.217391304347826	0.0945945945945946	0.125	23.161961495524	40.0268799926839	9.48782687613921	24.879369334986	-1.24661561410659	29.6326879999778	-0.0188283440045823	0.438713406033187	0.542776096202781	10.160752230878	0.00400731167144116	0.138686803226825	32.6102940791202	0	9.48782687613921	21.5134120290986	0.0366300366300366	6.76646706586826	141.05211466811	32.6102940791202	11.9683628473437	84.6850291139077
fb_rec20p_per12	20	20	1	JAR_FilterBank	7	110	1	0	224	412	287	0	0	0.237623762376238	0.696601941747573	0	0.350877192982456	0.236363636363636	0.140350877192982	24.6460317023266	42.1532834052768	0.920920028476825	23.6715521462622	-0.840573964465693	37.5125561463882	-0.0258259264965407	0.685261966185719	1.0098287373693	31.2499381801533	-0.0266193683782408	0.166670688748518	27.4391445967696	0	0.920920028476825	23.562323431805	0.0544554455445545	-10.9634146341463	187.729387194544	27.4391445967696	37.9855106701315	76.4621451290367
fb_rec20p_per12	20	20	1	JAR_FilterBank	7	110	1	2	255	328	159	0	0	0.175675675675676	0.484756097560976	0	0.18	0.148148148148148	0.149532710280374	22.4709175009698	40.2697288736244	10.5963916997854	24.1903498600233	0.0514495655441384	30.3869001744496	0.00616269395593689	0.58520844126309	0.789387012767676	31.5112351422969	0.0127744997867413	0.178842657306608	28.7828813285006	0	10.5963916997854	20.2815939418825	0.0315315315315315	9.42857142857143	150.896705177493	28.7828813285006	32.0207221350079	103.048093882964
fb_rec20p_per12	20	20	1	JAR_FilterBank	7	110	1	1	265	377	231	0	0	0.202586206896552	0.612732095490716	0	0.307692307692308	0.234375	0.142857142857143	21.0852368517115	37.6168260792891	6.9654579495282	23.3980090665517	2.9824527455883	26.0356602149991	0.0182096659919235	0.781381195204171	-1.68230759745239	22.3606028680699	-0.050203079509378	0.494772361123857	27.4958823603718	0	6.9654579495282	19.8106659678144	0.00431034482758621	13.87265917603	172.000433536916	27.4958823603718	29.694696969697	102.464061332708
fb_rec20p_per12	20	20	1	JAR_FilterBank	7	110	1	3	266	443	253	0	0	0.119341563786008	0.571106094808126	0	0.222222222222222	0.129032258064516	0.00847457627118644	21.8078402101413	39.6386396350954	8.90495008434539	26.2989440019079	1.51489789975156	26.9955642784085	0.0356773025890226	0.417552485223024	0.726371975602813	9.941127473632	-0.00117616573647725	0.149982801941759	36.754513963903	0	8.90495008434539	20.3922490218585	0.0164609053497942	26.9325513196481	154.18685616409	36.754513963903	40.6626944771586	76.9805716909272
fb_rec20p_per12	20	20	1	JAR_FilterBank	7	110	1	0	237	318	251	0	0	0.184357541899441	0.789308176100629	0	0.210526315789474	0.153846153846154	0.263157894736842	21.9158531014483	40.0863111593938	-2.03603104780113	23.07641297801	-2.99823111488032	42.9548028436611	-0.0739357199608808	0.830415885424477	-7.04110068939854	42.2738051065531	-0.0155919375520938	0.150695605531191	27.2059718943302	0	-2.03603104780113	24.5055698013247	0.0391061452513966	-15.4141414141414	182.559969152814	27.2059718943302	-10.9787234042553	92.6234756048243
fb_rec20p_per12	20	20	1	JAR_FilterBank	7	110	1	1	278	536	277	0	0	0.123134328358209	0.516791044776119	0	0.255813953488372	0.194805194805195	0.0310077519379845	21.0533896298635	36.4983201464303	10.8994565052715	23.3113634829972	0.965698000734596	23.2096070412618	-0.00463718635296082	0.375893015959184	-0.576941914919301	8.48484448434735	-0.01193268238648	0.127311723451336	34.8969211269266	0	10.8994565052715	18.3656141770667	0.0447761194029851	24.9090909090909	153.887012686034	34.8969211269266	50.6557883976489	73.8844277007716
fb_rec20p_per12	20	20	1	JAR_FilterBank	7	110	1	0	238	299	200	0	0	0.152941176470588	0.668896321070234	0	0.181818181818182	0.0769230769230769	0.0784313725490196	20.1238032669968	36.7583165147889	2.73200509455475	25.3164656834558	1.26348250118979	51.5847458494089	-0.0109843065201167	1.02003899111046	0.222627356207392	8.90829529558902	0.000445179872392269	0.115058934741156	36.3513646126907	0	2.73200509455475	21.0448926380884	0.0235294117647059	6.61032863849765	153.771281044115	36.3513646126907	7.75757575757576	87.559397089336
fb_rec20p_per12	20	20	1	JAR_FilterBank	7	110	1	3	195	395	285	0	0	0.224719101123595	0.721518987341772	0	0.285714285714286	0.213114754098361	0.142857142857143	25.766547737074	43.1963353443686	2.46916008988785	25.0371544273007	0.106136368536377	40.5169880619174	-0.0687250054424358	0.867578561906929	-1.19884649075481	23.8867224789377	-0.00397172274141165	0.299539185548873	30.1487947462095	0	2.46916008988785	25.7332556009938	0.0449438202247191	-8.08510638297872	183.303629230669	30.1487947462095	24.4891238898088	109.249138434619
fb_rec20p_per12	20	20	1	JAR_FilterBank	7	110	1	1	243	316	177	0	0	0.163265306122449	0.560126582278481	0	0.224489795918367	0.108695652173913	0.142857142857143	19.9238653501398	36.1737221541897	8.70726021431873	23.580178154649	-1.00279601647913	29.052486964276	-0.0146030274476254	0.421852564373008	2.60082144703951	22.7405939366732	-0.0093713069359501	0.12009546754704	29.0085799972064	0	8.70726021431873	18.1836408510385	0.0408163265306122	4.31007751937984	163.785272659271	29.0085799972064	28.5204336947456	83.8811140999976
fb_rec20p_per12	20	20	1	JAR_FilterBank	7	110	1	0	272	360	220	0	0	0.222727272727273	0.611111111111111	0	0.41304347826087	0.186046511627907	0.169642857142857	21.6906043022863	37.788840459681	7.64439399654798	24.8478387934617	-4.04019999491685	29.8076014972612	0.0414826240683652	0.550401532977035	-1.40743368755688	21.9856266123203	-0.0034925938882234	0.138818189076478	29.5341313121528	0	7.64439399654798	18.9266734396133	0.0227272727272727	16.6132404181185	160.247231080083	29.5341313121528	27.895652173913	71.7724686884347
fb_rec20p_per12	20	20	1	JAR_FilterBank	7	110	1	3	305	559	332	0	0	0.216666666666667	0.59391771019678	0	0.365384615384615	0.257142857142857	0.13768115942029	25.8560217643189	42.585796793277	9.40909558953249	28.3648164479626	-0.401418591149474	27.9885956939027	-0.0118032238977394	0.80803386599267	-1.94766142541329	18.0765592647307	-0.0124747441947118	0.11889916891626	33.4516762934789	0	9.40909558953249	22.2777427230379	0.0166666666666667	16.7673860911271	143.709462816499	33.4516762934789	28.0706384230656	79.6107373809108
fb_rec20p_per12	20	20	1	JAR_FilterBank	7	110	1	1	209	243	143	0	0	0.151515151515152	0.588477366255144	0	0.173913043478261	0.1	0.145454545454545	19.588322597455	36.5568902399495	8.36977548975428	22.8768463818956	0.325675704629781	28.0527830764097	0.0235794191241014	0.340447789411903	-0.263361506002167	14.3884300054573	0.036321495258411	0.205488750445962	30.1440767665249	0	8.36977548975428	19.0242670658873	0.0363636363636364	6.79329608938547	157.240732778414	30.1440767665249	24.0555555555556	69.9085698445847
fb_rec20p_per12	20	20	1	JAR_FilterBank	7	110	1	1	192	257	144	0	0	0.122448979591837	0.560311284046693	0	0.125	0.142857142857143	0.0833333333333333	19.4955128316361	35.4456936275243	7.90866636459878	23.6510479286117	-1.67093774206706	32.6797671536825	-0.0502329494717282	0.298496674036676	-2.69753899243126	25.3873305052241	0.00925462488599749	0.154040426947594	34.9388026935292	0	7.90866636459878	19.7527428582381	0.0612244897959184	26.1538461538462	215.878959162977	34.9388026935292	64.4902564102564	134.625119638227
fb_rec20p_per12	20	20	1	JAR_FilterBank	7	110	1	2	345	414	211	0	0	0.157894736842105	0.509661835748792	0	0.28125	0.15	0.133333333333333	22.43199155023	41.4932094032002	12.0689849233188	25.7092804316518	-0.666030645272003	21.8386476408419	0.0256305324822688	0.555713743852385	1.00069613175338	10.0761115184772	0.00142762326645472	0.165616005998075	32.6775678021841	0	12.0689849233188	21.3331432047816	0.0263157894736842	14.4970414201183	131.944648239085	32.6775678021841	27.1528942115768	67.1363376615965
fb_rec20p_per12	20	20	1	JAR_FilterBank	7	110	1	2	238	333	225	0	0	0.147239263803681	0.675675675675676	0	0.148936170212766	0.18	0.0769230769230769	20.2643751406373	37.3140486064509	2.62896430699707	23.1474336005959	-1.5467253513572	38.0753481824434	0.0309669663340784	0.758343083204893	-0.299851432795707	6.27601600271551	-0.00244300295816456	0.0822417734634829	33.7362099629158	0	2.62896430699707	21.1780365628658	0.049079754601227	24.1016949152542	166.480636652116	33.7362099629158	44.8823529411765	61.6270752214576
fb_rec20p_per12	20	20	1	JAR_FilterBank	7	110	1	1	266	447	284	0	0	0.223529411764706	0.635346756152125	0	0.444444444444444	0.245901639344262	0.0991735537190083	24.606595222541	42.0667941451934	5.91574987262759	26.2712593881994	-1.72066866776887	32.5936697975544	-0.0622063492644798	0.935479258210408	0.230737208520921	26.3204681964981	0.0104843402582942	0.142180718027482	33.0645560340105	0	5.91574987262759	22.4026667099341	0.0588235294117647	20.6341463414634	163.428669339135	33.0645560340105	33.2665245202559	76.6323678805512
fb_rec20p_per12	20	20	1	JAR_FilterBank	7	110	1	1	177	314	222	0	0	0.220858895705521	0.707006369426752	0	0.263157894736842	0.157894736842105	0.148148148148148	24.9418652330797	42.8941161873365	2.25702943955421	23.9673493078004	1.21817148924602	35.2947932674033	0.0456016028396416	0.688050865401776	3.00869186675384	14.8536419325774	-0.00673841085977764	0.158439570781509	29.1969698991234	0	2.25702943955421	25.62467710213	0.0429447852760736	3.16535433070866	195.000264063043	29.1969698991234	32.2662037037037	80.2747271257842
fb_rec20p_per12	20	20	1	JAR_FilterBank	7	110	1	0	254	454	276	0	0	0.266666666666667	0.607929515418502	0	0.307692307692308	0.236363636363636	0.104166666666667	23.9019640541601	42.2491635184149	6.71462637847401	25.0812650037544	-3.90152956091468	28.718736294065	0.0198664633849904	0.684773489775061	0.187362875187323	15.8568089823147	-0.00600629478580182	0.158921316332926	31.139829479178	0	6.71462637847401	21.5077453270331	0.0291666666666667	1.44943820224719	150.613132714788	31.139829479178	13.9989051094891	75.5999738530809
fb_rec20p_per12	20	20	1	JAR_FilterBank	7	110	1	2	263	422	277	0	0	0.269709543568465	0.656398104265403	0	0.270833333333333	0.25	0.268041237113402	24.2410556903922	43.2559966907023	3.56546985952902	27.1000268033855	-0.772979541345884	33.7445783903444	0.101982730946152	1.03405085399874	-1.21602877882628	27.2558659866843	-0.0064655191067613	0.261246157828663	24.9065346311244	0	3.56546985952902	23.4802132570281	0.020746887966805	-6.19108280254777	165.429874094473	24.9065346311244	11.2867167919799	105.127095673659
fb_rec20p_per12	20	20	1	JAR_FilterBank	7	110	1	1	256	463	297	0	0	0.263392857142857	0.6414686825054	0	0.297297297297297	0.253521126760563	0.207920792079208	22.5786774412683	41.0707286208958	4.42738333072341	23.0564373838901	-1.15222879495471	30.3024620774661	0.0666265457616034	0.685047980148662	2.19748092961197	25.6610778808773	-0.00532181462148175	0.156186939693381	24.2011917399995	0	4.42738333072341	20.6081019310404	0.03125	13.8421052631579	152.024928703711	24.2011917399995	46.2938888888889	80.6533426484051
