# Supplementary material for: A sensorimotor model shows why a spectral jamming avoidance response does not help bats deal with jamming
Source: eLife. 2020 Jul 28;9:e55539. doi: 10.7554/eLife.55539 (PMC7406351; doi:10.7554/eLife.55539)
Supplement: Figure 3—source data 2. [file elife-55539-fig3-data2.txt]

NumberOfBats	NumOfPreys	ReceiverType	NumberOfCatches	NumberOfPulses	NumberOfDetections	NumberOfInterfernces	NumberOfInreferencesFromDirectCalls	NumberOfInreferencesFromMasking	InterferenceToHuntedRatio	TotalInterferenceRatio	Reference_PowerDetector_TotalRatio	Search_MaskingRatioToHunted	Approach_MaskingRatioToHunted	Buzz_MaskingRatioToHunted	MaskingLevelDB_ave	MaskingLevelDB_Q90
2	10	CorrelationDetector	3	308	287	2	2	0	0	0.00696864111498258	0.0871080139372822	0	0	0	1.46371088836083	3.16844455948784
2	10	CorrelationDetector	5	498	693	11	11	0	0	0.0158730158730159	0.0836940836940837	0	0	0	1.7774135393291	2.79173955730023
2	10	CorrelationDetector	4	431	536	17	17	0	0.00748129675810474	0.0317164179104478	0.0895522388059701	0.0196078431372549	0	0	1.73758262508425	3.66982632077267
2	10	CorrelationDetector	5	441	605	20	20	0	0.013953488372093	0.0330578512396694	0.109090909090909	0	0	0.0188679245283019	1.71360023370624	3.02414342128984
2	10	NoMasking	3	347	368	0	0	0	0	0	0.0380434782608696	0	0	0	0.733968891624983	0.153111107057267
2	10	NoMasking	4	302	380	0	0	0	0	0	0.0526315789473684	0	0	0	0.80340471316854	0.51378893156364
2	10	NoMasking	4	434	458	0	0	0	0	0	0.0764192139737991	0	0	0	1.08801261103028	1.12561746108604
2	10	NoMasking	3	419	434	0	0	0	0	0	0.0576036866359447	0	0	0	0.914783232989463	1.02196067813708
2	10	NoMasking	3	335	294	0	0	0	0	0	0.0578231292517007	0	0	0	1.07344784813966	0.613441529867853
2	10	NoMasking	2	373	441	0	0	0	0	0	0.036281179138322	0	0	0	0.817805770213388	0.438769872276331
2	10	NoMasking	2	294	407	0	0	0	0	0	0.142506142506143	0	0	0	0.835354080388441	0.14575377907028
2	10	NoMasking	4	313	273	0	0	0	0	0	0.0695970695970696	0	0	0	0.772313237007571	0.278057902472833
2	10	NoMasking	4	542	719	0	0	0	0	0	0.122392211404729	0	0	0	1.94881765168843	4.50597057940516
2	10	NoMasking	3	347	450	0	0	0	0	0	0.206666666666667	0	0	0	1.65650887292838	4.11563044984343
2	10	NoMasking	3	379	461	0	0	0	0	0	0.0867678958785249	0	0	0	1.6845168833687	3.00484756902514
2	10	NoMasking	4	493	621	0	0	0	0	0	0.0676328502415459	0	0	0	1.1327279131682	0.675133436784743
2	10	NoMasking	3	358	543	0	0	0	0	0	0.178637200736648	0	0	0	2.56467418248528	7.97930098440726
2	10	NoMasking	4	458	522	0	0	0	0	0	0.0957854406130268	0	0	0	2.54494506931021	8.15027308232263
2	10	NoMasking	3	567	865	0	0	0	0	0	0.183815028901734	0	0	0	1.29979730833589	3.74947070805443
2	10	NoMasking	3	444	711	0	0	0	0	0	0.0984528832630098	0	0	0	1.28110726762707	3.97318497384151
2	10	NoMasking	3	318	384	0	0	0	0	0	0.130208333333333	0	0	0	1.79402376712485	2.405778011041
2	10	NoMasking	2	283	325	0	0	0	0	0	0.123076923076923	0	0	0	1.63336206102807	3.14638841826137
2	10	NoMasking	2	261	378	0	0	0	0	0	0.14021164021164	0	0	0	2.00370628640908	3.32232304679324
2	10	NoMasking	2	271	409	0	0	0	0	0	0.107579462102689	0	0	0	1.6254013951469	2.04111027460083
2	10	CorrelationDetector	4	435	543	6	6	0	0	0.0110497237569061	0.0423572744014733	0	0	0	1.05425500686405	0.605979745033053
2	10	CorrelationDetector	5	375	579	7	7	0	0	0.0120898100172712	0.0552677029360967	0	0	0	1.30575846690782	1.40171171602861
2	10	NoMasking	4	535	789	0	0	0	0	0	0.119138149556401	0	0	0	2.0750010079806	5.61308982923997
2	10	NoMasking	7	392	781	0	0	0	0	0	0.162612035851472	0	0	0	2.34093602062786	6.41973269519219
3	10	NoMasking	3	439	497	0	0	0	0	0	0.108651911468813	0	0	0	2.19660590182781	9.44983651536209
3	10	NoMasking	3	358	417	0	0	0	0	0	0.194244604316547	0	0	0	2.13579650039883	7.21149370355516
3	10	NoMasking	2	300	326	0	0	0	0	0	0.150306748466258	0	0	0	1.81078683492517	5.96855443038067
3	10	NoMasking	3	283	195	0	0	0	0	0	0.235897435897436	0	0	0	2.70170930978458	8.52294719301407
3	10	NoMasking	2	295	312	0	0	0	0	0	0.0833333333333333	0	0	0	2.690549804067	8.72058482966257
3	10	NoMasking	4	514	602	0	0	0	0	0	0.0415282392026578	0	0	0	1.12758861532704	2.45823970320429
3	10	NoMasking	4	496	504	0	0	0	0	0	0.0892857142857143	0	0	0	2.04064059320197	6.39482873063729
3	10	NoMasking	4	380	469	0	0	0	0	0	0.166311300639659	0	0	0	2.15434065557146	6.60222399088537
3	10	NoMasking	6	628	886	0	0	0	0	0	0.125282167042889	0	0	0	1.9715932618103	6.39779916069863
3	10	NoMasking	3	364	459	0	0	0	0	0	0.137254901960784	0	0	0	2.43840504409276	9.78722569341751
3	10	NoMasking	4	343	395	0	0	0	0	0	0.230379746835443	0	0	0	2.86614206313411	11.7821153487308
3	10	NoMasking	2	488	513	0	0	0	0	0	0.128654970760234	0	0	0	3.15822090639955	13.8471030031763
3	10	NoMasking	5	314	595	0	0	0	0	0	0.26890756302521	0	0	0	3.2660942929088	11.0828675366375
3	10	NoMasking	2	276	353	0	0	0	0	0	0.294617563739377	0	0	0	4.11813337655566	18.2437731254309
3	10	NoMasking	4	365	505	0	0	0	0	0	0.386138613861386	0	0	0	4.31228921062388	17.1179090953283
3	10	NoMasking	5	495	706	0	0	0	0	0	0.185552407932011	0	0	0	3.28726400303135	13.222050699772
3	10	NoMasking	1	278	310	0	0	0	0	0	0.254838709677419	0	0	0	3.00035442388112	12.7264680766636
3	10	NoMasking	4	337	315	0	0	0	0	0	0.219047619047619	0	0	0	4.35375626908655	19.7778764676089
3	10	NoMasking	2	533	741	0	0	0	0	0	0.114709851551957	0	0	0	2.37152322894875	7.57324369896953
3	10	NoMasking	2	279	291	0	0	0	0	0	0.247422680412371	0	0	0	2.8379791644793	9.78915347951571
3	10	NoMasking	3	404	350	0	0	0	0	0	0.0628571428571429	0	0	0	1.35804175844257	3.41093264952644
3	10	NoMasking	2	307	308	0	0	0	0	0	0.172077922077922	0	0	0	3.57145894114375	15.4498727535156
3	10	NoMasking	3	323	456	0	0	0	0	0	0.24780701754386	0	0	0	3.86957696182934	16.9915773698064
3	10	NoMasking	3	475	456	0	0	0	0	0	0.177631578947368	0	0	0	3.99227097142307	17.7142559251702
3	10	NoMasking	3	328	460	0	0	0	0	0	0.202173913043478	0	0	0	2.61364733752557	10.6419902311996
3	10	NoMasking	2	371	363	0	0	0	0	0	0.129476584022039	0	0	0	2.51179584503644	9.76433126411122
3	10	NoMasking	2	396	327	0	0	0	0	0	0.0978593272171254	0	0	0	2.15533866790595	6.41948340603825
2	10	CorrelationDetector	4	256	323	10	10	0	0.0218340611353712	0.0309597523219814	0.13312693498452	0.0350877192982456	0	0.0166666666666667	2.32437760447716	7.1239008990104
2	10	CorrelationDetector	3	400	589	15	15	0	0.00503778337531486	0.0254668930390492	0.0611205432937182	0.0408163265306122	0	0	1.69414475978808	2.61900152732118
3	10	NoMasking	3	328	578	0	0	0	0	0	0.269896193771626	0	0	0	3.15405806718732	11.3211881765427
3	10	NoMasking	3	582	769	0	0	0	0	0	0.205461638491547	0	0	0	2.7854489018257	10.5838731435623
3	10	NoMasking	3	578	667	0	0	0	0	0	0.191904047976012	0	0	0	3.35872924772639	11.5853415235616
3	10	NoMasking	3	491	718	0	0	0	0	0	0.174094707520891	0	0	0	3.07073738797272	12.5462484769488
3	10	NoMasking	2	325	290	0	0	0	0	0	0.137931034482759	0	0	0	2.57957980114819	8.85832661743426
3	10	NoMasking	5	461	628	0	0	0	0	0	0.113057324840764	0	0	0	2.87279351608123	12.3678585292413
3	10	NoMasking	2	346	288	0	0	0	0	0	0.232638888888889	0	0	0	2.74255136487064	11.4709551526829
3	10	NoMasking	3	402	670	0	0	0	0	0	0.176119402985075	0	0	0	2.31280606601144	6.54418516477588
3	10	NoMasking	4	430	536	0	0	0	0	0	0.220149253731343	0	0	0	3.55465544852825	12.3085528229664
3	10	NoMasking	5	450	625	0	0	0	0	0	0.2336	0	0	0	4.05307385708325	16.1134599143869
3	10	NoMasking	3	462	672	0	0	0	0	0	0.285714285714286	0	0	0	3.58009294195946	15.5811532773194
3	10	NoMasking	3	327	420	0	0	0	0	0	0.257142857142857	0	0	0	3.04127583610782	11.7796099432684
3	10	NoMasking	2	554	813	0	0	0	0	0	0.285362853628536	0	0	0	4.19397061002182	15.6876301391636
3	10	NoMasking	5	349	566	0	0	0	0	0	0.243816254416961	0	0	0	3.29679737490736	13.0318705308434
3	10	NoMasking	6	533	997	0	0	0	0	0	0.321965897693079	0	0	0	5.03146872536283	18.7668970307174
3	10	NoMasking	2	441	616	0	0	0	0	0	0.147727272727273	0	0	0	3.18785952702994	11.4782690913996
3	10	NoMasking	7	596	800	0	0	0	0	0	0.19125	0	0	0	3.75582808894892	15.2229077952171
3	10	NoMasking	4	421	712	0	0	0	0	0	0.313202247191011	0	0	0	3.43760465065204	12.8378711105901
3	10	NoMasking	5	296	523	0	0	0	0	0	0.221797323135755	0	0	0	4.2306733331287	16.9263288524656
3	10	NoMasking	6	347	659	0	0	0	0	0	0.344461305007587	0	0	0	4.6450875119409	19.8343518443493
3	10	NoMasking	3	288	506	0	0	0	0	0	0.328063241106719	0	0	0	4.08254780060942	16.9392459428457
3	10	NoMasking	3	396	569	0	0	0	0	0	0.112478031634446	0	0	0	2.1948304765703	7.49110666497274
3	10	NoMasking	5	380	537	0	0	0	0	0	0.17877094972067	0	0	0	2.79795953472961	9.7289992019306
3	10	NoMasking	1	286	470	0	0	0	0	0	0.174468085106383	0	0	0	2.97129011682079	10.3303364351872
3	10	NoMasking	3	246	392	0	0	0	0	0	0.193877551020408	0	0	0	3.52754923539692	12.6074154485733
3	10	NoMasking	3	369	530	0	0	0	0	0	0.20188679245283	0	0	0	3.83151593251518	15.297377068441
3	10	NoMasking	3	436	614	0	0	0	0	0	0.120521172638436	0	0	0	3.29458838323879	14.5907749292411
3	10	NoMasking	2	288	353	0	0	0	0	0	0.269121813031161	0	0	0	4.71417804422534	19.4804086234541
3	10	NoMasking	2	313	386	0	0	0	0	0	0.235751295336788	0	0	0	4.94648268671175	19.4147199868083
3	10	NoMasking	4	268	461	0	0	0	0	0	0.262472885032538	0	0	0	3.6598461196319	14.7068988349397
2	10	CorrelationDetector	1	224	299	3	3	0	0.00510204081632653	0.0100334448160535	0.0334448160535117	0.02	0	0	0.945121823358353	0.820634608972166
2	10	CorrelationDetector	1	372	403	5	5	0	0.00943396226415094	0.0124069478908189	0.054590570719603	0	0	0.012987012987013	1.3035687737913	1.75664706990253
3	10	NoMasking	1	334	420	0	0	0	0	0	0.35	0	0	0	4.77684391347034	21.7116628715046
3	10	NoMasking	3	414	570	0	0	0	0	0	0.308771929824561	0	0	0	4.11079589888079	16.8620202404556
3	10	NoMasking	3	378	413	0	0	0	0	0	0.2590799031477	0	0	0	3.60979034558132	13.8441791017544
5	10	NoMasking	3	234	259	0	0	0	0	0	0.44015444015444	0	0	0	5.03288882536847	19.6514967951062
5	10	NoMasking	4	356	329	0	0	0	0	0	0.273556231003039	0	0	0	5.36410456674961	21.1178228508115
5	10	NoMasking	3	415	392	0	0	0	0	0	0.193877551020408	0	0	0	4.17094301642765	15.4563800953943
5	10	NoMasking	5	452	662	0	0	0	0	0	0.367069486404834	0	0	0	6.06685660528028	23.5774413833989
5	10	NoMasking	1	335	403	0	0	0	0	0	0.496277915632754	0	0	0	5.92323963541145	22.6444670648529
5	10	NoMasking	6	511	709	0	0	0	0	0	0.167842031029619	0	0	0	4.04794114933159	15.6879542891001
5	10	NoMasking	4	408	411	0	0	0	0	0	0.250608272506083	0	0	0	5.03564755608761	19.3262411300248
5	10	NoMasking	1	296	299	0	0	0	0	0	0.247491638795987	0	0	0	4.62596128761476	18.7281724309016
5	10	NoMasking	3	391	498	0	0	0	0	0	0.269076305220884	0	0	0	4.27470220293879	15.8059542361024
5	10	NoMasking	3	285	355	0	0	0	0	0	0.357746478873239	0	0	0	5.17386724344728	20.0853528114359
5	10	NoMasking	4	471	562	0	0	0	0	0	0.234875444839858	0	0	0	4.95530576263248	18.9597555194676
5	10	NoMasking	6	376	602	0	0	0	0	0	0.333887043189369	0	0	0	4.89142904829391	17.8995144775995
5	10	NoMasking	2	400	488	0	0	0	0	0	0.368852459016393	0	0	0	5.00747615305155	18.7921685008939
5	10	NoMasking	2	343	372	0	0	0	0	0	0.451612903225806	0	0	0	5.25002131193098	19.9771696718387
5	10	NoMasking	4	382	447	0	0	0	0	0	0.230425055928412	0	0	0	5.47525783994082	19.3347759439224
5	10	NoMasking	3	423	453	0	0	0	0	0	0.306843267108168	0	0	0	4.71710318813588	18.8997177894752
5	10	NoMasking	2	313	304	0	0	0	0	0	0.4375	0	0	0	6.06660550889341	23.3418196126929
5	10	NoMasking	2	339	265	0	0	0	0	0	0.184905660377358	0	0	0	3.56217342814905	14.2988844552454
5	10	NoMasking	3	365	510	0	0	0	0	0	0.341176470588235	0	0	0	6.20654346359732	22.9190138037874
5	10	NoMasking	4	462	485	0	0	0	0	0	0.338144329896907	0	0	0	4.8420627979709	19.8965371058139
5	10	NoMasking	3	397	338	0	0	0	0	0	0.281065088757396	0	0	0	4.74062406268041	17.5628883559015
5	10	NoMasking	4	476	586	0	0	0	0	0	0.186006825938567	0	0	0	4.35755050100963	17.2615838980074
5	10	NoMasking	6	472	713	0	0	0	0	0	0.277699859747546	0	0	0	5.82832141982618	20.6811007320277
5	10	NoMasking	3	279	416	0	0	0	0	0	0.372596153846154	0	0	0	5.38903987362087	20.0909853359074
5	10	NoMasking	3	271	426	0	0	0	0	0	0.387323943661972	0	0	0	5.6593138432359	19.8751590894386
5	10	NoMasking	2	394	551	0	0	0	0	0	0.377495462794918	0	0	0	5.7479884193063	21.1584318793502
5	10	NoMasking	8	618	733	0	0	0	0	0	0.289222373806276	0	0	0	6.63617016131309	24.3054257654719
5	10	NoMasking	0	247	193	0	0	0	0	0	0.663212435233161	0	0	0	5.49938991183683	20.6511203185246
5	10	NoMasking	4	487	624	0	0	0	0	0	0.254807692307692	0	0	0	4.96398382869174	19.9551997970251
5	10	NoMasking	2	348	310	0	0	0	0	0	0.167741935483871	0	0	0	3.10273205314162	11.4381514179156
5	10	NoMasking	0	201	127	0	0	0	0	0	0.354330708661417	0	0	0	5.73412708297553	23.1489533726906
5	10	NoMasking	2	351	552	0	0	0	0	0	0.467391304347826	0	0	0	5.60482262356838	22.7649956282112
5	10	NoMasking	2	376	510	0	0	0	0	0	0.184313725490196	0	0	0	4.5322384604757	19.5343732919485
5	10	NoMasking	5	473	518	0	0	0	0	0	0.193050193050193	0	0	0	5.25960475566291	21.2506762748019
5	10	NoMasking	2	261	397	0	0	0	0	0	0.44080604534005	0	0	0	5.87677148699007	22.0505397282202
5	10	NoMasking	3	342	473	0	0	0	0	0	0.585623678646934	0	0	0	8.57266790144329	29.116018063431
5	10	NoMasking	2	371	576	0	0	0	0	0	0.583333333333333	0	0	0	8.2815133925026	26.9567442547367
5	10	NoMasking	2	320	715	0	0	0	0	0	0.555244755244755	0	0	0	7.473766684657	26.0268360141581
5	10	NoMasking	5	543	1309	0	0	0	0	0	0.398013750954927	0	0	0	8.10021325552945	26.7746017187926
5	10	NoMasking	1	338	442	0	0	0	0	0	0.443438914027149	0	0	0	7.05011621588279	24.3204328320612
5	10	NoMasking	4	455	756	0	0	0	0	0	0.424603174603175	0	0	0	7.13123847116031	24.8840228150434
5	10	NoMasking	3	358	393	0	0	0	0	0	0.28498727735369	0	0	0	6.09153785562925	21.207800253829
5	10	NoMasking	2	420	548	0	0	0	0	0	0.450729927007299	0	0	0	8.61960976593523	29.5085998458286
5	10	NoMasking	7	473	711	0	0	0	0	0	0.436005625879044	0	0	0	8.65218885642203	28.9633211881306
5	10	NoMasking	2	474	729	0	0	0	0	0	0.580246913580247	0	0	0	9.2310657095222	30.3633583592591
2	10	CorrelationDetector	4	545	805	24	24	0	0.0111940298507463	0.0298136645962733	0.0720496894409938	0.0909090909090909	0.037037037037037	0	1.67765824966681	2.20659848611865
2	10	CorrelationDetector	4	292	357	12	12	0	0	0.0336134453781513	0.109243697478992	0	0	0	1.61620907874845	2.91733971807939
5	10	NoMasking	3	348	499	0	0	0	0	0	0.424849699398798	0	0	0	6.61406687473344	25.0009238507493
5	10	NoMasking	4	271	402	0	0	0	0	0	0.467661691542289	0	0	0	6.2269629147114	21.3270387242186
5	10	NoMasking	6	420	556	0	0	0	0	0	0.390287769784173	0	0	0	7.07877455122578	26.637111859752
5	10	NoMasking	1	330	407	0	0	0	0	0	0.238329238329238	0	0	0	5.10856225237329	18.7929608061328
5	10	NoMasking	1	247	264	0	0	0	0	0	0.617424242424242	0	0	0	5.84143246846004	21.7382013447875
5	10	NoMasking	6	446	633	0	0	0	0	0	0.454976303317536	0	0	0	7.78649568452882	27.7144874699728
5	10	NoMasking	2	366	463	0	0	0	0	0	0.360691144708423	0	0	0	7.15452577898883	26.358618517078
5	10	NoMasking	2	276	303	0	0	0	0	0	0.541254125412541	0	0	0	6.21631407808714	24.1002659259909
5	10	NoMasking	5	486	897	0	0	0	0	0	0.364548494983278	0	0	0	7.95051237210622	28.2059145777388
5	10	NoMasking	3	399	581	0	0	0	0	0	0.388984509466437	0	0	0	7.32762636476572	26.3397169968599
5	10	NoMasking	3	272	307	0	0	0	0	0	0.342019543973941	0	0	0	5.45139344348854	22.2276822178196
5	10	NoMasking	2	300	487	0	0	0	0	0	0.570841889117043	0	0	0	7.17724849487478	25.8611060961964
5	10	NoMasking	1	309	469	0	0	0	0	0	0.402985074626866	0	0	0	7.02954791049421	26.2737263159481
5	10	NoMasking	2	352	341	0	0	0	0	0	0.413489736070381	0	0	0	6.1038879836126	22.1236483076558
5	10	NoMasking	3	674	940	0	0	0	0	0	0.327659574468085	0	0	0	6.2252719043676	23.0532669928014
7	10	NoMasking	4	270	352	0	0	0	0	0	0.386363636363636	0	0	0	6.46838113414161	22.8853486771268
7	10	NoMasking	4	378	373	0	0	0	0	0	0.364611260053619	0	0	0	7.18191431809264	24.4575942764962
7	10	NoMasking	3	226	252	0	0	0	0	0	0.5	0	0	0	8.4992868384395	27.9004088643656
7	10	NoMasking	3	402	543	0	0	0	0	0	0.333333333333333	0	0	0	9.74266668479112	30.8397149528661
7	10	NoMasking	5	498	596	0	0	0	0	0	0.296979865771812	0	0	0	7.41770985645813	24.1962432933608
7	10	NoMasking	4	392	484	0	0	0	0	0	0.297520661157025	0	0	0	7.80856122061548	25.5260020832581
7	10	NoMasking	2	256	473	0	0	0	0	0	0.536997885835095	0	0	0	10.2264815203428	31.4491155043992
7	10	NoMasking	1	241	243	0	0	0	0	0	0.267489711934156	0	0	0	5.83774449970451	21.0439418260363
7	10	NoMasking	3	368	274	0	0	0	0	0	0.167883211678832	0	0	0	5.24024082591537	19.0827271292433
7	10	NoMasking	2	286	273	0	0	0	0	0	0.454212454212454	0	0	0	5.57783326134442	19.5737034279849
7	10	NoMasking	6	522	918	0	0	0	0	0	0.34640522875817	0	0	0	7.58310503571725	23.1703453996416
7	10	NoMasking	5	404	570	0	0	0	0	0	0.317543859649123	0	0	0	7.45632271434346	24.0343045070942
7	10	NoMasking	4	454	673	0	0	0	0	0	0.364041604754829	0	0	0	7.82413411268342	25.4537036966758
7	10	NoMasking	2	190	320	0	0	0	0	0	0.484375	0	0	0	7.60790681734712	23.951368631612
7	10	NoMasking	5	467	682	0	0	0	0	0	0.404692082111437	0	0	0	8.49475441007911	26.406316693346
7	10	NoMasking	6	595	1215	0	0	0	0	0	0.445267489711934	0	0	0	8.4342135541133	26.0602695962201
7	10	NoMasking	2	276	204	0	0	0	0	0	0.352941176470588	0	0	0	5.99941181651898	21.267537231571
7	10	NoMasking	2	286	256	0	0	0	0	0	0.44140625	0	0	0	6.44566526273282	21.447672734568
7	10	NoMasking	4	304	392	0	0	0	0	0	0.420918367346939	0	0	0	7.39198550327905	24.6380273889397
7	10	NoMasking	1	258	274	0	0	0	0	0	0.503649635036496	0	0	0	6.6242840845986	23.0511844692712
7	10	NoMasking	3	412	534	0	0	0	0	0	0.49625468164794	0	0	0	8.27835924959607	27.5267325620401
7	10	NoMasking	1	323	668	0	0	0	0	0	0.520958083832335	0	0	0	8.86467600276861	29.2122269683515
7	10	NoMasking	1	275	138	0	0	0	0	0	0.710144927536232	0	0	0	6.25780629885756	23.5765102459891
7	10	NoMasking	2	397	684	0	0	0	0	0	0.611111111111111	0	0	0	9.37807153330836	29.1477032504079
7	10	NoMasking	3	300	271	0	0	0	0	0	0.313653136531365	0	0	0	6.00569603872876	21.7169161912059
7	10	NoMasking	3	310	237	0	0	0	0	0	0.261603375527426	0	0	0	6.35946007766842	23.2235295602664
7	10	NoMasking	4	535	612	0	0	0	0	0	0.477124183006536	0	0	0	8.61734554075008	27.5209657703778
7	10	NoMasking	1	216	376	0	0	0	0	0	0.609042553191489	0	0	0	9.31285095622385	29.1451190400512
7	10	NoMasking	2	356	535	0	0	0	0	0	0.34392523364486	0	0	0	7.67086502415712	27.0900864743233
7	10	NoMasking	7	475	700	0	0	0	0	0	0.351428571428571	0	0	0	9.59088297248576	29.9716882590674
7	10	NoMasking	2	241	366	0	0	0	0	0	0.579234972677596	0	0	0	9.6607470333827	30.9542326843965
7	10	NoMasking	2	248	244	0	0	0	0	0	0.581967213114754	0	0	0	9.14482336167364	31.7148391606123
7	10	NoMasking	1	337	412	0	0	0	0	0	0.456310679611651	0	0	0	11.2714521257846	36.7097235698847
7	10	NoMasking	3	300	410	0	0	0	0	0	0.458536585365854	0	0	0	9.34662540913094	30.7065578832127
7	10	NoMasking	0	190	202	0	0	0	0	0	0.678217821782178	0	0	0	10.4597311863479	34.4764829823546
7	10	NoMasking	2	382	393	0	0	0	0	0	0.333333333333333	0	0	0	7.01004001818878	25.2970319128377
7	10	NoMasking	1	388	685	0	0	0	0	0	0.483211678832117	0	0	0	9.43157794395173	30.7350924567147
7	10	NoMasking	5	389	594	0	0	0	0	0	0.417508417508417	0	0	0	8.3894234647957	27.65036376173
7	10	NoMasking	4	514	727	0	0	0	0	0	0.434662998624484	0	0	0	8.82439124101552	26.4100155109152
7	10	NoMasking	4	330	422	0	0	0	0	0	0.450236966824645	0	0	0	8.21892422829031	27.2309269288271
7	10	NoMasking	5	379	396	0	0	0	0	0	0.401515151515151	0	0	0	7.29627788853874	24.4151161252973
7	10	NoMasking	0	180	110	0	0	0	0	0	0.609090909090909	0	0	0	5.87248448099217	20.5477962020321
7	10	NoMasking	3	277	423	0	0	0	0	0	0.654846335697399	0	0	0	11.0494564069617	31.3640027236787
7	10	NoMasking	0	338	627	0	0	0	0	0	0.491228070175439	0	0	0	8.35292898398483	27.5577376290935
7	10	NoMasking	2	223	293	0	0	0	0	0	0.440273037542662	0	0	0	8.56960853335602	27.0337983334916
7	10	NoMasking	2	294	399	0	0	0	0	0	0.458646616541353	0	0	0	9.0483203721582	27.0613278135364
7	10	NoMasking	2	342	617	0	0	0	0	0	0.585089141004862	0	0	0	11.6875366728022	35.065779925117
7	10	NoMasking	3	349	462	0	0	0	0	0	0.554112554112554	0	0	0	11.2208404220373	33.9884096207174
7	10	NoMasking	3	395	546	0	0	0	0	0	0.567765567765568	0	0	0	11.4569712197571	34.0587364497609
2	10	CorrelationDetector	4	336	401	23	23	0	0.0144927536231884	0.057356608478803	0.13216957605985	0.0612244897959184	0	0.00490196078431373	0.932602678244236	0.349402270519644
2	10	CorrelationDetector	2	402	460	26	26	0	0.027027027027027	0.0565217391304348	0.11304347826087	0	0.0212765957446809	0.032520325203252	1.44812525981305	0.389721952775994
7	10	NoMasking	3	284	297	0	0	0	0	0	0.471380471380471	0	0	0	9.34263093764255	30.880124510028
7	10	NoMasking	5	499	596	0	0	0	0	0	0.375838926174497	0	0	0	8.77868508427733	28.5743726035381
7	10	NoMasking	3	265	392	0	0	0	0	0	0.375	0	0	0	7.72144721473938	24.3020387082432
7	10	NoMasking	2	254	343	0	0	0	0	0	0.451895043731778	0	0	0	7.45881149294219	23.5457292488849
7	10	NoMasking	3	236	216	0	0	0	0	0	0.462962962962963	0	0	0	8.44515472222351	26.9306398370751
7	10	NoMasking	3	363	438	0	0	0	0	0	0.440639269406393	0	0	0	9.18028562715947	29.5209532512457
7	10	NoMasking	1	362	401	0	0	0	0	0	0.304239401496259	0	0	0	8.12942495256032	26.9044682226317
7	10	NoMasking	2	347	435	0	0	0	0	0	0.6	0	0	0	8.73017872599944	27.1953233774243
7	10	NoMasking	2	342	405	0	0	0	0	0	0.567901234567901	0	0	0	7.30958569098592	24.903235192016
7	10	NoMasking	3	426	545	0	0	0	0	0	0.363302752293578	0	0	0	6.91799306185205	22.9336624588963
7	10	NoMasking	2	362	370	0	0	0	0	0	0.327027027027027	0	0	0	6.13016149364821	20.9791145590161
7	10	NoMasking	2	320	418	0	0	0	0	0	0.342105263157895	0	0	0	5.85084857780415	19.869124331784
7	10	NoMasking	2	373	328	0	0	0	0	0	0.454268292682927	0	0	0	7.62284019951257	25.6626065297039
7	10	NoMasking	4	347	503	0	0	0	0	0	0.377733598409543	0	0	0	6.9499094926651	24.6201038320516
10	10	NoMasking	2	320	355	0	0	0	0	0	0.442253521126761	0	0	0	11.7068741763536	33.5008082431491
10	10	NoMasking	3	398	717	0	0	0	0	0	0.672245467224547	0	0	0	14.0505001180498	36.8005452115416
10	10	NoMasking	2	205	107	0	0	0	0	0	0.252336448598131	0	0	0	5.83843321826719	19.0424948028348
10	10	NoMasking	1	393	466	0	0	0	0	0	0.669527896995708	0	0	0	12.4036910093309	34.723139363769
10	10	NoMasking	3	549	768	0	0	0	0	0	0.41796875	0	0	0	11.6372953092943	30.2550507719392
10	10	NoMasking	3	429	498	0	0	0	0	0	0.399598393574297	0	0	0	10.9727163254216	29.8919660194511
10	10	NoMasking	0	275	460	0	0	0	0	0	0.747826086956522	0	0	0	13.5374909525834	35.1922429767542
10	10	NoMasking	2	338	547	0	0	0	0	0	0.73491773308958	0	0	0	15.6081800140016	37.9641268989318
10	10	NoMasking	2	265	222	0	0	0	0	0	0.315315315315315	0	0	0	7.76519387917501	23.2544396781314
10	10	NoMasking	2	389	588	0	0	0	0	0	0.579931972789116	0	0	0	11.7835581212112	31.8269757436997
10	10	NoMasking	3	392	431	0	0	0	0	0	0.450116009280742	0	0	0	10.6068119330024	28.5869652949238
10	10	NoMasking	2	411	521	0	0	0	0	0	0.500959692898273	0	0	0	12.5585917721673	32.8233157331356
10	10	NoMasking	3	359	564	0	0	0	0	0	0.521276595744681	0	0	0	10.9238403419875	29.7415711589773
10	10	NoMasking	4	370	816	0	0	0	0	0	0.620098039215686	0	0	0	11.9311737801778	30.752985932359
10	10	NoMasking	4	317	407	0	0	0	0	0	0.528255528255528	0	0	0	10.9060084659492	31.17307551981
10	10	NoMasking	4	491	791	0	0	0	0	0	0.584070796460177	0	0	0	12.0207738045652	32.1819572154193
10	10	NoMasking	2	383	371	0	0	0	0	0	0.398921832884097	0	0	0	10.2975066615686	29.2453596187962
10	10	NoMasking	2	297	258	0	0	0	0	0	0.538759689922481	0	0	0	9.21337023383853	29.1924003735526
10	10	NoMasking	2	221	211	0	0	0	0	0	0.578199052132701	0	0	0	10.0901279870276	28.1803691626399
10	10	NoMasking	2	323	383	0	0	0	0	0	0.451697127937337	0	0	0	8.03702055398531	23.5980440857822
10	10	NoMasking	3	327	445	0	0	0	0	0	0.57752808988764	0	0	0	12.8023587257311	32.8959425474801
10	10	NoMasking	1	291	404	0	0	0	0	0	0.571782178217822	0	0	0	13.3938914257209	32.8889398510348
10	10	NoMasking	3	312	257	0	0	0	0	0	0.618677042801556	0	0	0	12.5729128173185	33.6509640071867
10	10	NoMasking	3	321	429	0	0	0	0	0	0.526806526806527	0	0	0	11.5873469938519	33.334311907647
10	10	NoMasking	4	421	739	0	0	0	0	0	0.419485791610284	0	0	0	8.88455880569234	24.4786573713187
10	10	NoMasking	3	322	230	0	0	0	0	0	0.595652173913043	0	0	0	12.2041334457138	33.1609983290858
10	10	NoMasking	0	412	445	0	0	0	0	0	0.766292134831461	0	0	0	13.6747683843949	35.6732905425177
10	10	NoMasking	3	462	458	0	0	0	0	0	0.558951965065502	0	0	0	12.4861609507542	33.3479538447241
10	10	NoMasking	4	399	523	0	0	0	0	0	0.458891013384321	0	0	0	12.8979789061393	34.4837479094647
10	10	NoMasking	0	270	299	0	0	0	0	0	0.648829431438127	0	0	0	13.6047648197196	35.8398191084299
10	10	NoMasking	3	326	422	0	0	0	0	0	0.597156398104265	0	0	0	12.6864451343548	33.0596963855868
10	10	NoMasking	2	233	149	0	0	0	0	0	0.583892617449664	0	0	0	9.14100003330703	27.0929326284786
10	10	NoMasking	3	348	535	0	0	0	0	0	0.517757009345794	0	0	0	12.5132913769755	32.1676511753321
10	10	NoMasking	0	309	526	0	0	0	0	0	0.661596958174905	0	0	0	12.0167933316906	31.6554321302942
10	10	NoMasking	4	456	700	0	0	0	0	0	0.475714285714286	0	0	0	10.9096927706056	29.2870822837764
10	10	NoMasking	5	437	995	0	0	0	0	0	0.632160804020101	0	0	0	14.1213838872196	35.2364711185288
10	10	NoMasking	2	298	452	0	0	0	0	0	0.652654867256637	0	0	0	10.9227086811465	28.3983218797025
10	10	NoMasking	4	452	587	0	0	0	0	0	0.468483816013629	0	0	0	11.312936199906	30.0104610449778
10	10	NoMasking	1	302	361	0	0	0	0	0	0.512465373961219	0	0	0	8.95367775294302	26.2030898333044
10	10	NoMasking	1	293	350	0	0	0	0	0	0.611428571428571	0	0	0	10.8108971947971	30.7167318135172
10	10	NoMasking	1	237	314	0	0	0	0	0	0.671974522292994	0	0	0	12.1701307581937	31.635255939805
10	10	NoMasking	2	289	433	0	0	0	0	0	0.727482678983834	0	0	0	13.0293731357652	34.1648826920558
10	10	NoMasking	2	356	664	0	0	0	0	0	0.481927710843373	0	0	0	13.9739000483303	35.763564913599
10	10	NoMasking	1	207	143	0	0	0	0	0	0.657342657342657	0	0	0	9.39938596088115	27.9828654190129
10	10	NoMasking	3	289	260	0	0	0	0	0	0.392307692307692	0	0	0	10.2757615291945	31.0762814735185
10	10	NoMasking	2	329	452	0	0	0	0	0	0.460176991150442	0	0	0	12.417565293803	33.5640529472526
10	10	NoMasking	0	328	253	0	0	0	0	0	0.766798418972332	0	0	0	11.2529410099786	32.3256626971176
10	10	NoMasking	4	382	354	0	0	0	0	0	0.466101694915254	0	0	0	10.5551852170219	31.0020221220868
10	10	NoMasking	0	244	182	0	0	0	0	0	0.862637362637363	0	0	0	12.2009539578118	34.9278845916575
10	10	NoMasking	1	260	315	0	0	0	0	0	0.650793650793651	0	0	0	12.0313741715751	32.2574087386279
10	10	NoMasking	3	373	512	0	0	0	0	0	0.703125	0	0	0	12.4584877369482	33.9566169536756
10	10	NoMasking	2	323	318	0	0	0	0	0	0.421383647798742	0	0	0	10.681021843711	29.7885209101815
10	10	NoMasking	3	472	778	0	0	0	0	0	0.561696658097686	0	0	0	13.9253238648896	35.5317131394516
10	10	NoMasking	3	354	627	0	0	0	0	0	0.508771929824561	0	0	0	11.5287298447805	29.6621452330132
10	10	NoMasking	3	391	430	0	0	0	0	0	0.5	0	0	0	10.6499808930091	29.2463655003367
10	10	NoMasking	2	243	268	0	0	0	0	0	0.58955223880597	0	0	0	11.4974124816121	30.0942010303809
10	10	NoMasking	3	302	482	0	0	0	0	0	0.591286307053942	0	0	0	12.5336716554692	32.4894901421389
10	10	NoMasking	2	268	291	0	0	0	0	0	0.611683848797251	0	0	0	11.5667726296395	32.9764607480625
10	10	NoMasking	2	417	790	0	0	0	0	0	0.530379746835443	0	0	0	11.3801622031684	29.1828379663589
10	10	NoMasking	5	588	741	0	0	0	0	0	0.452091767881242	0	0	0	11.4054013750091	32.6846069026717
20	10	NoMasking	3	300	293	0	0	0	0	0	0.474402730375427	0	0	0	15.1353488274219	32.4125610128644
20	10	NoMasking	2	262	317	0	0	0	0	0	0.709779179810726	0	0	0	16.4209784944652	34.7983962826716
20	10	NoMasking	5	349	520	0	0	0	0	0	0.588461538461538	0	0	0	17.4023056985374	34.0289937708694
20	10	NoMasking	4	405	699	0	0	0	0	0	0.619456366237482	0	0	0	17.6186508908785	34.8825305847063
20	10	NoMasking	1	253	192	0	0	0	0	0	0.635416666666667	0	0	0	14.2664383502213	31.9133504053177
20	10	NoMasking	1	227	200	0	0	0	0	0	0.7	0	0	0	15.8893695434798	33.9256829014093
20	10	NoMasking	0	234	452	0	0	0	0	0	0.869469026548673	0	0	0	17.6820517420317	36.3526602558242
20	10	NoMasking	1	240	334	0	0	0	0	0	0.760479041916168	0	0	0	18.4935515072533	39.1554887496446
20	10	NoMasking	3	344	549	0	0	0	0	0	0.746812386156648	0	0	0	20.4299396871211	40.4708916357644
20	10	NoMasking	2	245	118	0	0	0	0	0	0.567796610169492	0	0	0	16.4009336256281	36.2597825752074
20	10	NoMasking	2	272	267	0	0	0	0	0	0.737827715355805	0	0	0	14.6201020153571	33.0205641133104
20	10	NoMasking	2	344	523	0	0	0	0	0	0.688336520076482	0	0	0	20.2817532456928	39.9651693852172
20	10	NoMasking	3	337	318	0	0	0	0	0	0.606918238993711	0	0	0	16.8132808482653	37.338219317152
20	10	NoMasking	3	336	521	0	0	0	0	0	0.677543186180422	0	0	0	20.2592603076418	39.7324815468195
20	10	NoMasking	1	269	344	0	0	0	0	0	0.811046511627907	0	0	0	17.321083062821	36.6339309861375
20	10	NoMasking	2	299	320	0	0	0	0	0	0.66875	0	0	0	19.1336198077903	39.1806598172043
20	10	NoMasking	2	358	396	0	0	0	0	0	0.623737373737374	0	0	0	17.6509288430557	36.0196831362814
20	10	NoMasking	4	298	453	0	0	0	0	0	0.686534216335541	0	0	0	17.8204948313277	36.093899690166
20	10	NoMasking	4	400	664	0	0	0	0	0	0.617469879518072	0	0	0	20.2023209979834	38.3177402535312
20	10	NoMasking	2	267	447	0	0	0	0	0	0.736017897091723	0	0	0	18.7206150850632	37.6570681838177
20	10	NoMasking	5	333	512	0	0	0	0	0	0.607421875	0	0	0	18.7605276403485	35.9294048664667
20	10	NoMasking	3	553	598	0	0	0	0	0	0.662207357859532	0	0	0	21.575536399503	41.8922084557329
20	10	NoMasking	2	387	458	0	0	0	0	0	0.51528384279476	0	0	0	15.5854548520196	32.0936298169589
20	10	NoMasking	1	342	349	0	0	0	0	0	0.759312320916905	0	0	0	19.5968387437294	38.9331081530481
20	10	NoMasking	2	333	484	0	0	0	0	0	0.783057851239669	0	0	0	18.889532807987	37.1968049221185
20	10	NoMasking	3	375	561	0	0	0	0	0	0.677361853832442	0	0	0	20.959503782908	37.7660295311568
20	10	NoMasking	2	268	253	0	0	0	0	0	0.754940711462451	0	0	0	19.2995398954423	39.9241216692906
20	10	NoMasking	3	351	410	0	0	0	0	0	0.514634146341463	0	0	0	18.2539371298353	37.6000239351283
20	10	NoMasking	2	273	188	0	0	0	0	0	0.686170212765957	0	0	0	16.8071564465927	35.3047947362201
20	10	NoMasking	3	312	486	0	0	0	0	0	0.753086419753086	0	0	0	20.5684578838234	39.0271343489596
20	10	NoMasking	1	259	310	0	0	0	0	0	0.816129032258065	0	0	0	20.5633528596344	39.296015633414
20	10	NoMasking	0	229	214	0	0	0	0	0	0.817757009345794	0	0	0	17.5750177161567	36.7510852304669
20	10	NoMasking	1	314	295	0	0	0	0	0	0.738983050847458	0	0	0	19.4842882141244	38.5887458103684
20	10	NoMasking	1	251	424	0	0	0	0	0	0.658018867924528	0	0	0	19.6788617408888	38.51765925954
20	10	NoMasking	4	414	515	0	0	0	0	0	0.629126213592233	0	0	0	20.4925692477439	39.2423155850561
20	10	NoMasking	2	430	701	0	0	0	0	0	0.706134094151213	0	0	0	17.640284551252	34.6125926402414
20	10	NoMasking	0	266	303	0	0	0	0	0	0.745874587458746	0	0	0	17.4653032543283	36.8728367678379
20	10	NoMasking	1	306	352	0	0	0	0	0	0.613636363636364	0	0	0	17.5540832928392	36.8640500613501
20	10	NoMasking	1	275	452	0	0	0	0	0	0.763274336283186	0	0	0	21.7023705136478	40.9310118724297
20	10	NoMasking	2	245	325	0	0	0	0	0	0.830769230769231	0	0	0	18.4862169727568	36.991178922751
2	10	CorrelationDetector	2	342	404	55	55	0	0.0938511326860841	0.136138613861386	0.25	0.125	0	0.0710659898477157	2.98356710591481	11.327515292792
2	10	CorrelationDetector	2	255	516	91	91	0	0.0316205533596838	0.176356589147287	0.263565891472868	0.0571428571428571	0	0.015625	2.42973749493795	8.57784565383408
20	10	NoMasking	2	327	673	0	0	0	0	0	0.784546805349183	0	0	0	19.8598662260619	39.5463898056024
20	10	NoMasking	4	303	378	0	0	0	0	0	0.743386243386243	0	0	0	19.8428620209156	37.4932666375323
20	10	NoMasking	2	306	395	0	0	0	0	0	0.756962025316456	0	0	0	18.8271570029759	38.346101669556
20	10	NoMasking	1	280	284	0	0	0	0	0	0.700704225352113	0	0	0	18.0121968531485	38.212383401614
20	10	NoMasking	4	395	521	0	0	0	0	0	0.53742802303263	0	0	0	17.8303551378617	35.7358356843881
20	10	NoMasking	2	408	693	0	0	0	0	0	0.686868686868687	0	0	0	17.6636670133177	35.7785938429069
20	10	NoMasking	0	232	272	0	0	0	0	0	0.856617647058823	0	0	0	15.7687761166729	32.2312351031316
20	10	NoMasking	3	207	330	0	0	0	0	0	0.793939393939394	0	0	0	20.0812929731117	38.4114478793039
20	10	NoMasking	5	360	548	0	0	0	0	0	0.693430656934307	0	0	0	20.4221059354653	39.0292962173219
20	10	NoMasking	1	249	312	0	0	0	0	0	0.78525641025641	0	0	0	18.1553148047273	36.9926982047389
20	10	NoMasking	3	308	564	0	0	0	0	0	0.737588652482269	0	0	0	21.6976838631315	40.0746518113368
20	10	NoMasking	1	204	199	0	0	0	0	0	0.773869346733668	0	0	0	18.0736264845618	38.8049764239917
20	10	NoMasking	0	243	226	0	0	0	0	0	0.831858407079646	0	0	0	17.195847283476	34.9399976010572
20	10	NoMasking	3	522	613	0	0	0	0	0	0.588907014681892	0	0	0	20.6589274557279	39.9707986124703
20	10	NoMasking	2	253	194	0	0	0	0	0	0.664948453608247	0	0	0	16.6694419069155	35.0877548002021
20	10	NoMasking	3	270	359	0	0	0	0	0	0.71866295264624	0	0	0	21.7007408478991	42.46490826813
20	10	NoMasking	5	533	607	0	0	0	0	0	0.533772652388797	0	0	0	19.8439115299949	38.325029353496
20	10	NoMasking	1	328	327	0	0	0	0	0	0.63914373088685	0	0	0	17.494486136988	36.1262075305833
20	10	NoMasking	1	261	361	0	0	0	0	0	0.778393351800554	0	0	0	20.3634388254162	39.0343690477397
20	10	NoMasking	2	285	354	0	0	0	0	0	0.77683615819209	0	0	0	18.4011791280975	37.5046408123824
2	10	TimeSequenceTH	3	335	333	15	15	0	0.0186567164179104	0.045045045045045	0.114114114114114	0.04	0	0.0151515151515152	1.36160446804774	3.0158411345228
2	10	TimeSequenceTH	5	487	627	23	23	0	0.0228215767634855	0.0366826156299841	0.103668261562998	0.0227272727272727	0.0185185185185185	0.0207792207792208	1.4026962033209	2.50293584467649
2	10	TimeSequenceTH	4	415	599	16	16	0	0.0146699266503667	0.0267111853088481	0.0834724540901502	0.05	0	0.00952380952380952	1.72926441357579	2.08062050229613
2	10	TimeSequenceTH	1	279	266	15	15	0	0.0131578947368421	0.056390977443609	0.131578947368421	0.05	0	0.0072463768115942	1.89320685486409	4.32471328461619
2	10	TimeSequenceTH	1	218	125	1	1	0	0.0123456790123457	0.008	0.112	0.0222222222222222	0	0	0.87819165878884	0.355803427212942
2	10	TimeSequenceTH	3	388	440	9	9	0	0.00920245398773006	0.0204545454545455	0.0613636363636364	0.0238095238095238	0.0526315789473684	0	0.986044887709413	0.292734447619512
2	10	TimeSequenceTH	4	285	296	12	12	0	0.036036036036036	0.0405405405405405	0.128378378378378	0.0357142857142857	0	0.0416666666666667	1.90857980724046	3.84627045640159
2	10	TimeSequenceTH	3	216	390	28	28	0	0.0429447852760736	0.0717948717948718	0.156410256410256	0.0666666666666667	0	0.0263157894736842	1.72396555940228	2.754940534688
2	10	TimeSequenceTH	5	549	807	29	29	0	0.0147329650092081	0.0359355638166047	0.0706319702602231	0	0.0392156862745098	0.0132450331125828	1.04615437011489	0.893790194729917
2	10	TimeSequenceTH	3	361	358	16	16	0	0.0326530612244898	0.0446927374301676	0.0782122905027933	0	0	0.0421052631578947	1.29471132244639	2.49707513867906
2	10	TimeSequenceTH	4	402	571	29	29	0	0.0227272727272727	0.0507880910683012	0.0647985989492119	0.024390243902439	0	0.0274509803921569	2.00725888606255	6.09955862489734
2	10	TimeSequenceTH	2	332	488	11	11	0	0.00326797385620915	0.0225409836065574	0.0901639344262295	0	0.0263157894736842	0	1.66655031641849	3.01722189654016
2	10	TimeSequenceTH	2	316	300	12	12	0	0.0289256198347107	0.04	0.07	0	0	0.0388888888888889	1.77733533508545	2.14474458091761
2	10	TimeSequenceTH	2	375	362	7	7	0	0.0159744408945687	0.0193370165745856	0.074585635359116	0	0	0.0211864406779661	1.99219512116411	2.14471215032201
2	10	TimeSequenceTH	3	390	451	19	19	0	0.03125	0.0421286031042129	0.117516629711752	0	0	0.0411522633744856	2.19400549464552	4.02038008437635
2	10	TimeSequenceTH	2	355	447	44	44	0	0.0863787375415282	0.0984340044742729	0.203579418344519	0.0476190476190476	0.0256410256410256	0.0721649484536082	2.21470211889955	3.04033449040606
2	10	TimeSequenceTH	4	401	484	34	34	0	0.0323529411764706	0.0702479338842975	0.169421487603306	0.184210526315789	0	0.0120967741935484	1.61305759979772	3.59031167750063
2	10	TimeSequenceTH	2	420	486	23	23	0	0.0104712041884817	0.0473251028806584	0.088477366255144	0	0	0.0132450331125828	1.38930954262596	2.71542702580604
2	10	CorrelationDetector	1	363	542	29	29	0	0.021671826625387	0.0535055350553506	0.112546125461255	0.134615384615385	0	0	1.64900715400271	2.70387886666669
2	10	CorrelationDetector	4	357	458	28	28	0	0.029585798816568	0.0611353711790393	0.150655021834061	0.0645161290322581	0.0192307692307692	0.0191387559808612	2.04262382088919	5.25518311068251
2	10	TimeSequenceTH	2	271	491	55	55	0	0.0766283524904215	0.112016293279022	0.193482688391039	0.0158730158730159	0.142857142857143	0.0853658536585366	2.71386197641007	8.73161826184713
2	10	TimeSequenceTH	2	307	513	46	46	0	0.0206611570247934	0.0896686159844055	0.148148148148148	0.02	0	0.0236686390532544	3.03959712251723	11.8873657865384
2	10	TimeSequenceTH	3	361	339	17	17	0	0.0508474576271186	0.0501474926253687	0.0737463126843658	0	0	0.0652173913043478	1.35989502914929	1.18447619882999
2	10	TimeSequenceTH	2	450	544	22	22	0	0.0345679012345679	0.0404411764705882	0.0974264705882353	0	0	0.0415430267062315	1.31806412483061	2.141777148074
2	10	TimeSequenceTH	4	281	354	27	27	0	0.052863436123348	0.076271186440678	0.177966101694915	0.0769230769230769	0.0285714285714286	0.0413223140495868	3.38413269591777	12.7022817492107
2	10	TimeSequenceTH	1	328	409	35	35	0	0.0507936507936508	0.0855745721271394	0.183374083129584	0.123076923076923	0	0.0341463414634146	2.84890185210392	7.09196712361716
2	10	TimeSequenceTH	4	365	643	50	50	0	0.0198863636363636	0.0777604976671851	0.149300155520995	0.0357142857142857	0.0227272727272727	0.0181818181818182	2.61408687589387	7.55421323345949
2	10	TimeSequenceTH	3	290	438	41	41	0	0.0329218106995885	0.0936073059360731	0.226027397260274	0.111111111111111	0	0.0222222222222222	2.39951104094292	6.85365603452449
2	10	TimeSequenceTH	5	582	1204	88	88	0	0.0259067357512953	0.0730897009966777	0.108803986710963	0.102564102564103	0	0.0230607966457023	1.64768545571773	3.70485527857892
2	10	TimeSequenceTH	3	389	666	43	43	0	0.0136612021857923	0.0645645645645646	0.130630630630631	0.0408163265306122	0	0.00740740740740741	1.69640331919956	4.68081216656092
2	10	TimeSequenceTH	4	494	702	25	25	0	0.00936768149882904	0.0356125356125356	0.0512820512820513	0	0	0.0116618075801749	0.919717998311888	0.165340205637468
2	10	TimeSequenceTH	3	343	349	4	4	0	0.0104895104895105	0.0114613180515759	0.0630372492836676	0.024390243902439	0	0.0105820105820106	0.713457404442658	0.71496826923103
2	10	TimeSequenceTH	2	285	259	12	12	0	0.0311111111111111	0.0463320463320463	0.11969111969112	0	0.0681818181818182	0.0236220472440945	1.96451585494563	2.69662869499916
2	10	TimeSequenceTH	1	285	300	8	8	0	0.0206611570247934	0.0266666666666667	0.0866666666666667	0.0208333333333333	0.0526315789473684	0.0121951219512195	1.60510918868888	0.898008231919609
2	10	TimeSequenceTH	1	270	429	14	14	0	0.0173913043478261	0.0326340326340326	0.135198135198135	0.0444444444444444	0.0227272727272727	0	1.93083708114299	3.36917615327102
2	10	TimeSequenceTH	6	387	578	27	27	0	0.0393700787401575	0.0467128027681661	0.0830449826989619	0.0487804878048781	0.0172413793103448	0.047244094488189	2.01352235241482	3.21502299108441
2	10	TimeSequenceTH	4	431	691	42	42	0	0.0377833753148615	0.060781476121563	0.0926193921852388	0	0.0612244897959184	0.039344262295082	1.23005785475263	1.14556200827896
2	10	TimeSequenceTH	3	322	346	12	12	0	0.014760147601476	0.0346820809248555	0.0520231213872832	0	0.0196078431372549	0.0122699386503067	0.89479950314921	1.074999567027
2	10	TimeSequenceTH	3	322	387	14	14	0	0.010752688172043	0.0361757105943152	0.129198966408269	0	0.0263157894736842	0.0105263157894737	1.48568914466662	3.00571045776739
2	10	TimeSequenceTH	2	436	570	35	35	0	0.0472222222222222	0.0614035087719298	0.135087719298246	0	0	0.0511182108626198	1.95943460066368	2.95709822740146
2	10	CorrelationDetector	4	479	692	4	4	0	0	0.00578034682080925	0.0534682080924856	0	0	0	0.887001170262886	0.48825646697979
2	10	CorrelationDetector	4	423	441	8	8	0	0.0126582278481013	0.018140589569161	0.0748299319727891	0.032258064516129	0	0.0114503816793893	0.97760555008208	0.543247216809079
2	10	TimeSequenceTH	4	362	699	86	86	0	0.0619195046439628	0.123032904148784	0.178826895565093	0.0227272727272727	0.0819672131147541	0.0351758793969849	3.21109826471593	11.5372676994682
2	10	TimeSequenceTH	3	315	599	51	51	0	0.0643086816720257	0.0851419031719533	0.227045075125209	0.0526315789473684	0.0363636363636364	0.0833333333333333	2.67929661066633	9.51365824583841
2	10	TimeSequenceTH	3	331	337	14	14	0	0.0368852459016393	0.0415430267062315	0.0890207715133531	0	0	0.00598802395209581	1.20516583304097	0.987564989521271
2	10	TimeSequenceTH	2	497	473	32	32	0	0.0726392251815981	0.0676532769556025	0.0845665961945032	0.0625	0	0.0426829268292683	1.56017478416339	2.25474632380498
2	10	TimeSequenceTH	1	235	199	4	4	0	0.0078125	0.0201005025125628	0.110552763819095	0	0	0.0151515151515152	1.13163232459367	0.728210067073128
2	10	TimeSequenceTH	5	411	530	12	12	0	0.00808625336927224	0.0226415094339623	0.0584905660377358	0	0	0.0110294117647059	1.41118763115495	1.12664495962114
2	10	TimeSequenceTH	2	315	222	6	6	0	0.00561797752808989	0.027027027027027	0.0630630630630631	0	0	0.00746268656716418	0.978907643590415	0.809041662845044
2	10	TimeSequenceTH	6	394	629	13	13	0	0.00869565217391304	0.0206677265500795	0.0763116057233704	0.0416666666666667	0	0	0.877783440713503	0.590299873423586
2	10	TimeSequenceTH	5	325	413	15	15	0	0.0230263157894737	0.036319612590799	0.0968523002421307	0.0925925925925926	0	0.00970873786407767	1.64357649445029	4.52509558453531
2	10	TimeSequenceTH	3	310	497	30	30	0	0.0252707581227437	0.0603621730382294	0.126760563380282	0.0740740740740741	0	0.0159574468085106	1.39295069438817	2.93145391521856
2	10	TimeSequenceTH	6	406	532	17	17	0	0.0127877237851662	0.0319548872180451	0.0921052631578947	0.0208333333333333	0.0185185185185185	0.0102389078498294	1.42798513667599	2.96344811082438
2	10	TimeSequenceTH	4	488	678	24	24	0	0.0149253731343284	0.0353982300884956	0.0811209439528024	0	0.0208333333333333	0.0161290322580645	1.33890430999917	2.48125579505959
2	10	TimeSequenceTH	7	487	872	38	38	0	0.00721153846153846	0.0435779816513761	0.0837155963302752	0	0	0.0087719298245614	1.23357236180938	0.917236068977426
2	10	TimeSequenceTH	2	287	259	5	5	0	0	0.0193050193050193	0.0772200772200772	0	0	0	1.13226932297161	1.08657672057845
2	10	TimeSequenceTH	6	605	789	31	31	0	0.0183639398998331	0.0392902408111534	0.0760456273764259	0	0	0.021484375	1.00177734544919	0.899281847777978
2	10	TimeSequenceTH	3	364	424	20	20	0	0.00381679389312977	0.0471698113207547	0.101415094339623	0	0.03125	0	0.888149348625613	0.833654956132946
2	10	TimeSequenceTH	1	269	256	4	4	0	0.0206185567010309	0.015625	0.078125	0.025	0.037037037037037	0.01	1.34736823006208	1.08213150076541
2	10	TimeSequenceTH	3	390	495	21	21	0	0.0254237288135593	0.0424242424242424	0.0666666666666667	0	0.0192307692307692	0.0242914979757085	1.42123766012022	0.759232834717906
2	10	TimeSequenceTH	2	242	353	16	16	0	0.0246305418719212	0.0453257790368272	0.101983002832861	0.0476190476190476	0	0.015625	1.89407538122407	3.80701050747785
2	10	TimeSequenceTH	3	404	481	14	14	0	0.0116618075801749	0.0291060291060291	0.0727650727650728	0	0	0.0147058823529412	1.71842693323601	2.51993863956918
2	10	CorrelationDetector	1	296	268	13	13	0	0.0357142857142857	0.0485074626865672	0.194029850746269	0.0465116279069767	0	0.0256410256410256	2.45160350736764	4.71697571342709
2	10	CorrelationDetector	4	401	641	12	12	0	0.00755667506297229	0.0187207488299532	0.0639625585023401	0.0185185185185185	0	0.00347222222222222	1.83245599977165	1.6404387161376
2	10	TimeSequenceTH	3	370	449	10	10	0	0.00884955752212389	0.022271714922049	0.0846325167037862	0	0.0277777777777778	0.00826446280991736	2.37019722931143	8.81189662365397
2	10	TimeSequenceTH	2	397	745	31	31	0	0.0482233502538071	0.0416107382550336	0.134228187919463	0.113636363636364	0.0625	0.0346020761245675	2.04338947082235	6.19806038633034
3	10	TimeSequenceTH	4	496	487	21	21	0	0.0171149144254279	0.0431211498973306	0.0677618069815195	0.0714285714285714	0	0.0144927536231884	2.29059453192997	8.15462610393041
3	10	TimeSequenceTH	2	333	333	25	25	0	0.0474308300395257	0.0750750750750751	0.147147147147147	0.0714285714285714	0.0384615384615385	0.0443037974683544	2.55570265575205	8.59123371150858
3	10	TimeSequenceTH	4	395	506	54	54	0	0.0618279569892473	0.106719367588933	0.201581027667984	0.0444444444444444	0.140350877192982	0.0476190476190476	2.78109276250403	10.9752286108492
3	10	TimeSequenceTH	3	407	372	32	32	0	0.0626865671641791	0.0860215053763441	0.131720430107527	0.0512820512820513	0	0.0592592592592593	2.85673283431696	11.3023477037807
3	10	TimeSequenceTH	6	463	752	53	53	0	0.03125	0.0704787234042553	0.127659574468085	0.0444444444444444	0	0.0355029585798817	3.23046793872163	14.3569734534086
3	10	TimeSequenceTH	0	222	171	25	25	0	0.0991735537190083	0.146198830409357	0.233918128654971	0.0588235294117647	0.142857142857143	0.102941176470588	2.73024885993307	10.1455159484941
3	10	TimeSequenceTH	5	343	495	56	56	0	0.0431654676258993	0.113131313131313	0.266666666666667	0.0465116279069767	0.0454545454545455	0.041025641025641	3.25334135267298	13.9700299164204
3	10	TimeSequenceTH	2	446	619	52	52	0	0.051413881748072	0.0840064620355412	0.166397415185784	0.1	0	0.0535117056856187	3.72882815998468	14.0585823773336
3	10	TimeSequenceTH	1	225	316	32	32	0	0.0962962962962963	0.10126582278481	0.256329113924051	0.102040816326531	0.157894736842105	0.0847457627118644	3.04497603652507	12.1442076247023
3	10	TimeSequenceTH	4	512	681	53	53	0	0.052060737527115	0.0778267254038179	0.173274596182085	0.0217391304347826	0.0625	0.0516795865633075	3.71507452888212	15.0464219928176
3	10	TimeSequenceTH	1	245	326	45	45	0	0.0747126436781609	0.138036809815951	0.386503067484663	0.0980392156862745	0.0333333333333333	0.0972222222222222	3.91467446664916	16.9805673567834
3	10	TimeSequenceTH	3	301	393	67	67	0	0.153225806451613	0.170483460559796	0.292620865139949	0.25	0.119047619047619	0.126582278481013	4.84520464404294	20.5715316164496
3	10	TimeSequenceTH	2	238	297	40	40	0	0.0810810810810811	0.134680134680135	0.195286195286195	0.0350877192982456	0.0571428571428571	0.122222222222222	3.65128539361223	15.6298721147228
3	10	TimeSequenceTH	3	315	457	88	88	0	0.122033898305085	0.192560175054705	0.321663019693654	0.133333333333333	0.0909090909090909	0.0225988700564972	4.76055018807528	20.2941853777109
3	10	TimeSequenceTH	1	236	281	40	40	0	0.135294117647059	0.142348754448399	0.295373665480427	0	0	0.1	5.42402104682096	24.2043770629417
3	10	TimeSequenceTH	2	424	561	110	110	0	0.101333333333333	0.196078431372549	0.269162210338681	0.130434782608696	0.0277777777777778	0.0316205533596838	4.27701424743965	17.3224244807226
3	10	TimeSequenceTH	2	366	353	17	17	0	0.0471698113207547	0.0481586402266289	0.147308781869688	0.0256410256410256	0	0.0633484162895928	3.01863588850009	11.6109583352344
3	10	TimeSequenceTH	4	339	457	76	76	0	0.0959409594095941	0.166301969365427	0.358862144420131	0.157894736842105	0.0952380952380952	0.0457516339869281	3.83453282732483	15.0425733482387
3	10	TimeSequenceTH	3	297	449	40	40	0	0.049645390070922	0.089086859688196	0.164810690423163	0.046875	0	0.0558659217877095	2.00781573276223	5.99767054378271
3	10	TimeSequenceTH	3	352	352	16	16	0	0.0178571428571429	0.0454545454545455	0.0823863636363636	0.0416666666666667	0	0.00952380952380952	1.17621850624048	2.81343725507133
3	10	TimeSequenceTH	3	354	359	27	27	0	0.053125	0.0752089136490251	0.133704735376045	0.222222222222222	0.0238095238095238	0.0288461538461538	2.5625613371306	10.0428650838956
3	10	TimeSequenceTH	4	540	693	19	19	0	0.0103305785123967	0.0274170274170274	0.0764790764790765	0.0256410256410256	0	0.00959232613908873	1.90438163468909	6.78605585862187
3	10	TimeSequenceTH	2	314	397	24	24	0	0.0459363957597173	0.0604534005037783	0.141057934508816	0.027027027027027	0.078125	0.0432098765432099	2.91624518272091	10.8087019917487
3	10	TimeSequenceTH	2	385	479	32	32	0	0.0397553516819572	0.0668058455114822	0.118997912317328	0.0526315789473684	0.0857142857142857	0.0336134453781513	2.97994023465639	12.0113790806152
3	10	TimeSequenceTH	5	415	616	35	35	0	0.020671834625323	0.0568181818181818	0.107142857142857	0	0.0392156862745098	0.0141843971631206	1.96556455567485	6.49741528369499
3	10	TimeSequenceTH	5	317	451	40	40	0	0.0481927710843374	0.0886917960088692	0.152993348115299	0	0	0.0689655172413793	3.31841836982428	11.333493507831
3	10	TimeSequenceTH	3	371	442	30	30	0	0.0686274509803922	0.0678733031674208	0.15158371040724	0.025	0.0576923076923077	0.073394495412844	2.93146010174497	10.1192154466168
2	10	CorrelationDetector	4	476	629	15	15	0	0.00227272727272727	0.0238473767885533	0.0874403815580286	0.024390243902439	0	0	1.82673522026761	4.33539897041096
2	10	CorrelationDetector	3	292	308	15	15	0	0.0078740157480315	0.0487012987012987	0.0909090909090909	0	0	0	1.62959341239041	1.9737235467757
2	10	CorrelationDetector	2	424	458	10	10	0	0.00294117647058824	0.0218340611353712	0.0567685589519651	0.0263157894736842	0	0	1.41659985816482	2.61871532200864
2	10	CorrelationDetector	4	321	393	4	4	0	0.0107913669064748	0.0101781170483461	0.0712468193384224	0	0.025	0.00561797752808989	1.26177703171975	1.21043636263323
3	10	TimeSequenceTH	5	384	530	44	44	0	0.0495626822157434	0.0830188679245283	0.205660377358491	0.104166666666667	0	0.0419847328244275	3.1374995150523	13.0132951207192
3	10	TimeSequenceTH	1	364	373	44	44	0	0.0792079207920792	0.117962466487936	0.225201072386059	0.125	0.0625	0.0720720720720721	3.84547432836114	14.2413913136156
3	10	TimeSequenceTH	3	346	330	50	50	0	0.104089219330855	0.151515151515152	0.284848484848485	0.229166666666667	0.0833333333333333	0.0761421319796954	3.66744972772792	14.4058049865418
3	10	TimeSequenceTH	3	350	343	9	9	0	0.017921146953405	0.0262390670553936	0.104956268221574	0.0833333333333333	0	0.00480769230769231	1.38163549619213	3.29393331401739
3	10	TimeSequenceTH	2	364	465	69	69	0	0.0695364238410596	0.148387096774194	0.286021505376344	0.1875	0.0333333333333333	0.0324324324324324	2.83043710478512	11.0603735452654
3	10	TimeSequenceTH	2	414	596	77	77	0	0.0653409090909091	0.129194630872483	0.182885906040268	0.0333333333333333	0.0222222222222222	0.0265486725663717	2.88427306954635	10.0501978981406
3	10	TimeSequenceTH	2	284	350	34	34	0	0.0212765957446809	0.0971428571428571	0.205714285714286	0.0606060606060606	0	0.0185185185185185	3.11167467561597	12.6661984497125
3	10	TimeSequenceTH	5	323	604	67	67	0	0.0555555555555556	0.110927152317881	0.236754966887417	0.0212765957446809	0.0689655172413793	0.0372340425531915	3.50059446983029	14.8422404308574
3	10	TimeSequenceTH	2	228	318	29	29	0	0.06875	0.0911949685534591	0.213836477987421	0.05	0.0454545454545455	0.0813953488372093	2.63808314093804	8.76822350529247
3	10	TimeSequenceTH	5	521	708	57	57	0	0.0502008032128514	0.0805084745762712	0.11864406779661	0.0392156862745098	0	0.0542452830188679	2.66118858274183	9.83703239090161
3	10	TimeSequenceTH	1	252	183	5	5	0	0.0275862068965517	0.0273224043715847	0.19672131147541	0.0212765957446809	0.0555555555555556	0.0227272727272727	2.80963057276502	12.039172888404
3	10	TimeSequenceTH	2	286	329	25	25	0	0.0452261306532663	0.0759878419452888	0.130699088145897	0	0.0666666666666667	0.0476190476190476	1.87564833104588	6.63635166724859
3	10	TimeSequenceTH	4	283	405	39	39	0	0.0222222222222222	0.0962962962962963	0.217283950617284	0.0625	0	0.0147058823529412	2.13097518701382	6.29510424471577
3	10	TimeSequenceTH	3	293	400	54	54	0	0.0727272727272727	0.135	0.2	0	0.0444444444444444	0.107784431137725	2.72147746492801	9.81334882570554
3	10	TimeSequenceTH	1	182	242	22	22	0	0.0441176470588235	0.0909090909090909	0.338842975206612	0.0869565217391304	0.0434782608695652	0	2.85884777392677	12.3436465327532
3	10	TimeSequenceTH	3	462	659	39	39	0	0.0262582056892779	0.0591805766312595	0.113808801213961	0.0645161290322581	0.0172413793103448	0.0241691842900302	2.15037249182314	7.11564285604457
3	10	TimeSequenceTH	3	264	336	11	11	0	0.0260869565217391	0.0327380952380952	0.151785714285714	0.0377358490566038	0	0.0254777070063694	1.552708511615	3.93578841211783
3	10	TimeSequenceTH	2	407	500	33	33	0	0.0212765957446809	0.066	0.138	0.0588235294117647	0	0.015748031496063	1.96641392810653	6.94535410197909
3	10	TimeSequenceTH	2	314	359	47	47	0	0.0983606557377049	0.13091922005571	0.275766016713092	0.146341463414634	0.0344827586206897	0.102409638554217	3.9617289397333	16.8832325853381
3	10	TimeSequenceTH	3	500	529	40	40	0	0.082815734989648	0.0756143667296786	0.160680529300567	0	0.0566037735849057	0.0975609756097561	4.21552541998656	17.9929888686744
3	10	TimeSequenceTH	0	219	206	20	20	0	0.08	0.0970873786407767	0.286407766990291	0.0175438596491228	0	0.115384615384615	3.97634942166926	16.7325508071095
3	10	TimeSequenceTH	3	244	207	17	17	0	0.0727272727272727	0.0821256038647343	0.173913043478261	0.0681818181818182	0.114285714285714	0.05	2.89584495230353	9.75062928683641
3	10	TimeSequenceTH	4	534	985	63	63	0	0.0452830188679245	0.0639593908629442	0.146192893401015	0	0.0204081632653061	0.0481651376146789	3.28071319208397	13.6533759890916
3	10	TimeSequenceTH	2	365	710	95	95	0	0.0454545454545455	0.133802816901408	0.302816901408451	0.0384615384615385	0.0909090909090909	0.0376569037656904	3.46139175927482	13.2763150582256
3	10	TimeSequenceTH	3	301	332	43	43	0	0.0789473684210526	0.129518072289157	0.22289156626506	0.0645161290322581	0.116666666666667	0.0597014925373134	2.3908001909971	7.54653751752414
3	10	TimeSequenceTH	3	418	515	32	32	0	0.0425531914893617	0.0621359223300971	0.087378640776699	0	0.0882352941176471	0.0335820895522388	1.79665718464558	5.34452446956635
3	10	TimeSequenceTH	6	355	626	40	40	0	0.0249221183800623	0.0638977635782748	0.124600638977636	0.0731707317073171	0.0483870967741935	0	2.33077323605535	6.63850810284439
3	10	TimeSequenceTH	5	444	572	24	24	0	0.015625	0.041958041958042	0.0909090909090909	0.0232558139534884	0	0.0161812297734628	2.57375035667605	8.99201896164726
3	10	TimeSequenceTH	6	601	871	55	55	0	0.0319327731092437	0.0631458094144661	0.13203214695752	0.105263157894737	0.0735294117647059	0.0202020202020202	3.36780557898471	12.3992912327926
3	10	TimeSequenceTH	3	272	310	27	27	0	0.0454545454545455	0.0870967741935484	0.258064516129032	0.0192307692307692	0.0256410256410256	0.0606060606060606	3.21257384328694	12.4995499878114
2	10	CorrelationDetector	3	364	317	5	5	0	0	0.0157728706624606	0.0662460567823344	0	0	0	1.01062812843651	0.447287621127044
2	10	CorrelationDetector	4	385	507	2	2	0	0.00284900284900285	0.00394477317554241	0.0335305719921105	0	0	0	0.944923512213566	0.557052678881311
3	10	TimeSequenceTH	1	341	700	242	242	0	0.13353115727003	0.345714285714286	0.412857142857143	0.203703703703704	0.173076923076923	0.124223602484472	5.79528094688506	23.6868469007507
3	10	TimeSequenceTH	2	332	545	157	157	0	0.156462585034014	0.288073394495413	0.335779816513761	0.0888888888888889	0.0256410256410256	0.183098591549296	5.49727922049067	24.7474656985326
3	10	TimeSequenceTH	2	227	456	75	75	0	0.0806451612903226	0.164473684210526	0.333333333333333	0.241379310344828	0	0.0114942528735632	3.25234482407932	12.8724831016625
5	10	TimeSequenceTH	2	319	518	80	80	0	0.12779552715655	0.154440154440154	0.283783783783784	0.170212765957447	0.163636363636364	0.111731843575419	5.95045160618381	23.3955257723047
5	10	TimeSequenceTH	2	330	397	60	60	0	0.115384615384615	0.151133501259446	0.259445843828715	0.0588235294117647	0.161290322580645	0.108695652173913	5.64522576391887	23.5040895008886
5	10	TimeSequenceTH	3	296	400	50	50	0	0.016	0.125	0.1975	0.0789473684210526	0	0	3.60311622055159	13.9485689076304
5	10	TimeSequenceTH	2	302	334	35	35	0	0.0329218106995885	0.104790419161677	0.167664670658683	0.0666666666666667	0.0869565217391304	0.00649350649350649	3.61015763374215	14.3279299506621
5	10	TimeSequenceTH	2	222	205	55	55	0	0.128205128205128	0.268292682926829	0.458536585365854	0.254901960784314	0	0.0169491525423729	3.7233586254755	14.6244619476588
5	10	TimeSequenceTH	2	314	473	126	126	0	0.18141592920354	0.266384778012685	0.357293868921776	0.185185185185185	0.148936170212766	0.177631578947368	5.31344706787753	20.1127213641881
5	10	TimeSequenceTH	1	385	633	99	99	0	0.0853333333333333	0.156398104265403	0.290679304897314	0.0952380952380952	0.0909090909090909	0.084	5.8851180355575	21.5429003272394
5	10	TimeSequenceTH	4	380	619	91	91	0	0.0527777777777778	0.147011308562197	0.303715670436187	0.0185185185185185	0.0681818181818182	0.0555555555555556	6.11872216166553	21.6377643396799
5	10	TimeSequenceTH	1	377	828	200	200	0	0.11436170212766	0.241545893719807	0.420289855072464	0.222222222222222	0.120689655172414	0.0983606557377049	7.48725159431801	25.1569396494141
5	10	TimeSequenceTH	5	433	605	121	121	0	0.106870229007634	0.2	0.325619834710744	0.115384615384615	0.0338983050847458	0.102766798418972	6.40921843098327	22.9061110261012
5	10	TimeSequenceTH	4	393	602	108	108	0	0.0673575129533679	0.179401993355482	0.290697674418605	0.163265306122449	0	0.0573476702508961	4.95525890624611	19.1432854385409
5	10	TimeSequenceTH	2	264	402	80	80	0	0.123348017621145	0.199004975124378	0.368159203980099	0.131578947368421	0.0810810810810811	0.117021276595745	5.894067495426	21.8122245573731
5	10	TimeSequenceTH	3	345	527	106	106	0	0.157556270096463	0.201138519924099	0.351043643263757	0.0789473684210526	0.0277777777777778	0.160839160839161	6.84413401191896	26.4942151776197
5	10	TimeSequenceTH	3	304	359	80	80	0	0.118421052631579	0.222841225626741	0.348189415041783	0.296296296296296	0.0638297872340425	0.0683760683760684	5.41831027868672	21.3103499987898
5	10	TimeSequenceTH	2	370	493	98	98	0	0.137254901960784	0.198782961460446	0.328600405679513	0.12	0.131578947368421	0.101694915254237	5.88717073426267	22.6211236896313
5	10	TimeSequenceTH	1	338	484	84	84	0	0.118279569892473	0.173553719008264	0.252066115702479	0.218181818181818	0	0.103448275862069	4.88695788902987	17.1701250672893
5	10	TimeSequenceTH	5	343	561	102	102	0	0.0915750915750916	0.181818181818182	0.295900178253119	0.0975609756097561	0.0952380952380952	0.0885416666666667	5.54223813908764	20.5498100472792
5	10	TimeSequenceTH	2	478	565	49	49	0	0.0477326968973747	0.0867256637168142	0.246017699115044	0.0425531914893617	0.105263157894737	0.0449101796407186	5.79886373496543	21.4061456092112
5	10	TimeSequenceTH	3	250	350	57	57	0	0.0869565217391304	0.162857142857143	0.314285714285714	0.142857142857143	0.0740740740740741	0.0769230769230769	5.5329718964897	21.53550520805
5	10	TimeSequenceTH	0	237	238	32	32	0	0.11038961038961	0.134453781512605	0.399159663865546	0.075	0.147058823529412	0.170212765957447	5.4713221732821	20.5062962562604
5	10	TimeSequenceTH	4	382	499	82	82	0	0.112021857923497	0.164328657314629	0.31062124248497	0.1	0.111111111111111	0.108527131782946	7.48416968195231	27.6682295191265
5	10	TimeSequenceTH	3	308	349	39	39	0	0.0700389105058366	0.111747851002865	0.255014326647564	0.0425531914893617	0.128205128205128	0.0588235294117647	5.09309945024263	19.5678546682984
5	10	TimeSequenceTH	2	293	491	158	158	0	0.215277777777778	0.321792260692464	0.460285132382892	0.203703703703704	0.166666666666667	0.118421052631579	6.75357508330108	24.8016451232468
5	10	TimeSequenceTH	2	311	417	89	89	0	0.127413127413127	0.213429256594724	0.398081534772182	0.0512820512820513	0.0344827586206897	0.179640718562874	6.02988747044406	22.993801171116
5	10	TimeSequenceTH	3	337	673	169	169	0	0.155063291139241	0.25111441307578	0.402674591381872	0.121951219512195	0.0909090909090909	0.129411764705882	6.42846277346137	24.4388108267424
5	10	TimeSequenceTH	1	226	270	67	67	0	0.126126126126126	0.248148148148148	0.444444444444444	0.0816326530612245	0	0.160714285714286	4.98093709742459	18.7659153311222
5	10	TimeSequenceTH	4	454	990	249	249	0	0.131455399061033	0.251515151515152	0.378787878787879	0.194444444444444	0.123287671232877	0.123376623376623	7.86650350187228	26.8196216905187
5	10	TimeSequenceTH	2	310	557	128	128	0	0.150793650793651	0.229802513464991	0.402154398563734	0.152542372881356	0.1	0.111842105263158	7.45833175998873	26.5143989083464
5	10	TimeSequenceTH	3	305	718	200	200	0	0.162544169611307	0.278551532033426	0.45125348189415	0.175438596491228	0.170731707317073	0.146853146853147	8.25368766020432	28.3753192989469
5	10	TimeSequenceTH	3	202	318	73	73	0	0.169590643274854	0.229559748427673	0.424528301886792	0.157894736842105	0.0666666666666667	0.163265306122449	6.2379875336803	22.0948086626128
5	10	TimeSequenceTH	3	374	566	155	155	0	0.211038961038961	0.273851590106007	0.434628975265018	0.172413793103448	0.181818181818182	0.145833333333333	7.17945500614165	25.3860105970911
5	10	TimeSequenceTH	1	274	447	95	95	0	0.150943396226415	0.212527964205817	0.445190156599553	0.227272727272727	0.216216216216216	0.102362204724409	6.37182212576148	23.9067077142363
5	10	TimeSequenceTH	1	313	511	178	178	0	0.21969696969697	0.348336594911937	0.438356164383562	0.306122448979592	0.0357142857142857	0.171052631578947	6.7220313938422	23.9893617621465
5	10	TimeSequenceTH	2	309	470	107	107	0	0.12	0.227659574468085	0.370212765957447	0.175438596491228	0.0769230769230769	0.0638297872340425	6.46013581266895	24.3419152877757
5	10	TimeSequenceTH	3	353	570	162	162	0	0.126623376623377	0.284210526315789	0.447368421052632	0.153846153846154	0.0344827586206897	0.112994350282486	5.50678995476389	20.150374652607
5	10	TimeSequenceTH	1	213	196	65	65	0	0.21875	0.331632653061224	0.571428571428571	0.270833333333333	0.1	0.166666666666667	6.97987353607023	25.8491328076003
5	10	TimeSequenceTH	3	440	598	98	98	0	0.0921985815602837	0.163879598662207	0.250836120401338	0.121212121212121	0.0476190476190476	0.0971786833855799	6.18282685556751	23.1803735006638
5	10	TimeSequenceTH	3	369	698	188	188	0	0.215846994535519	0.269340974212034	0.439828080229226	0.186046511627907	0.191176470588235	0.214592274678112	8.24601937092838	29.9391309341299
5	10	TimeSequenceTH	2	358	706	220	220	0	0.166172106824926	0.311614730878187	0.454674220963173	0.254901960784314	0.108108108108108	0.167539267015707	8.290080726157	29.5966597907563
5	10	TimeSequenceTH	1	258	373	121	121	0	0.206896551724138	0.324396782841823	0.53083109919571	0.211538461538462	0.0714285714285714	0.0975609756097561	7.42720250014832	27.1972929776595
5	10	TimeSequenceTH	2	379	480	93	93	0	0.148148148148148	0.19375	0.275	0.0606060606060606	0.228070175438596	0.138461538461538	5.58844349377061	21.7741145419605
5	10	TimeSequenceTH	1	290	459	71	71	0	0.0606060606060606	0.154684095860566	0.276688453159041	0.0666666666666667	0.0909090909090909	0.0546875	5.62292047085245	22.7784926181157
5	10	TimeSequenceTH	1	219	269	74	74	0	0.244444444444444	0.275092936802974	0.513011152416357	0.157894736842105	0.214285714285714	0.192307692307692	7.19695699541713	28.2202905840205
5	10	TimeSequenceTH	0	205	405	127	127	0	0.195804195804196	0.31358024691358	0.469135802469136	0.157894736842105	0.15	0.238095238095238	6.17498912056104	23.2640701120512
5	10	TimeSequenceTH	2	209	250	82	82	0	0.274074074074074	0.328	0.556	0.287878787878788	0.0714285714285714	0.0566037735849057	7.53085901464219	28.4650329926825
2	10	CorrelationDetector	5	494	679	39	39	0	0.0209205020920502	0.0574374079528719	0.111929307805596	0.177777777777778	0	0.00522193211488251	2.75164351482027	7.86318564190217
2	10	CorrelationDetector	4	404	539	17	17	0	0.0200501253132832	0.0315398886827458	0.131725417439703	0.0666666666666667	0	0.0131147540983607	2.34885064069516	5.88129365529832
5	10	TimeSequenceTH	3	422	439	55	55	0	0.0605187319884726	0.125284738041002	0.170842824601367	0.0444444444444444	0.107142857142857	0.0563380281690141	4.80475339216018	18.5845206928718
5	10	TimeSequenceTH	3	290	386	51	51	0	0.0936329588014981	0.132124352331606	0.329015544041451	0.160714285714286	0	0.0760233918128655	4.84959252371269	18.0944675998442
5	10	TimeSequenceTH	3	315	400	104	104	0	0.13265306122449	0.26	0.3375	0.292682926829268	0.142857142857143	0.0941176470588235	5.88807488178198	22.8253881471046
5	10	TimeSequenceTH	5	346	659	123	123	0	0.100294985250737	0.186646433990895	0.314112291350531	0.0980392156862745	0.106060606060606	0.0990990990990991	6.1214022543178	23.0991059237149
5	10	TimeSequenceTH	3	351	404	45	45	0	0.0726643598615917	0.111386138613861	0.254950495049505	0.0816326530612245	0.0344827586206897	0.0679611650485437	4.74578138700858	18.8766829694649
5	10	TimeSequenceTH	2	344	409	34	34	0	0.0535117056856187	0.0831295843520782	0.198044009779951	0.155555555555556	0.075	0.0238095238095238	5.92448269350866	22.3606461596673
5	10	TimeSequenceTH	2	322	460	96	96	0	0.125925925925926	0.208695652173913	0.304347826086957	0.0833333333333333	0.1	0.099290780141844	6.30556720881607	23.2247119930495
5	10	TimeSequenceTH	1	234	302	67	67	0	0.133720930232558	0.221854304635762	0.433774834437086	0.113207547169811	0.0303030303030303	0.151162790697674	6.88482093023857	24.5607945374635
5	10	TimeSequenceTH	2	286	397	73	73	0	0.117857142857143	0.183879093198992	0.314861460957179	0.132075471698113	0.222222222222222	0.109756097560976	6.81622766172344	25.6711941530638
5	10	TimeSequenceTH	3	333	573	111	111	0	0.121212121212121	0.193717277486911	0.394415357766143	0.293103448275862	0.1	0.0880829015544041	7.46049113593012	26.172924122675
5	10	TimeSequenceTH	1	379	581	150	150	0	0.199346405228758	0.258175559380379	0.42512908777969	0.117647058823529	0	0.165876777251185	5.90217932700321	23.7364593468407
5	10	TimeSequenceTH	4	441	884	147	147	0	0.0644391408114559	0.166289592760181	0.260180995475113	0	0.1	0.0575079872204473	5.36138630939371	21.7148574254541
5	10	TimeSequenceTH	3	311	386	56	56	0	0.0533333333333333	0.145077720207254	0.316062176165803	0.0454545454545455	0	0.0657894736842105	4.98582661966296	18.8196244529708
5	10	TimeSequenceTH	1	373	455	125	125	0	0.192857142857143	0.274725274725275	0.415384615384615	0.184210526315789	0.125	0.0754716981132075	5.75676333437637	21.8296780379039
5	10	TimeSequenceTH	3	273	313	54	54	0	0.0981308411214953	0.172523961661342	0.325878594249201	0.24390243902439	0.113636363636364	0.0393700787401575	4.4528166070354	16.2665757857769
7	10	TimeSequenceTH	1	290	585	177	177	0	0.174216027874564	0.302564102564103	0.492307692307692	0.209677419354839	0.232558139534884	0.152542372881356	9.23457528955704	28.0435218927534
7	10	TimeSequenceTH	1	267	298	112	112	0	0.282608695652174	0.375838926174497	0.51006711409396	0.175	0.290322580645161	0.326086956521739	10.1868588799707	30.5065380733036
7	10	TimeSequenceTH	3	433	639	159	159	0	0.124069478908189	0.248826291079812	0.370892018779343	0.256410256410256	0.176470588235294	0.106666666666667	10.0644501421723	29.3718572285837
7	10	TimeSequenceTH	4	275	421	145	145	0	0.180904522613065	0.344418052256532	0.508313539192399	0.242424242424242	0.163636363636364	0.144144144144144	8.04704155414735	25.3307726665578
7	10	TimeSequenceTH	2	263	528	207	207	0	0.271356783919598	0.392045454545455	0.568181818181818	0.538461538461538	0.304347826086957	0.179245283018868	10.7283694727701	30.7999811684967
7	10	TimeSequenceTH	2	219	151	32	32	0	0.141666666666667	0.211920529801325	0.350993377483444	0.163636363636364	0	0.107692307692308	5.94279977021963	19.9911943361734
7	10	TimeSequenceTH	2	285	490	106	106	0	0.107142857142857	0.216326530612245	0.393877551020408	0.203389830508475	0.037037037037037	0.0451612903225806	8.02453025599721	26.3080092017265
7	10	TimeSequenceTH	3	377	712	194	194	0	0.130813953488372	0.27247191011236	0.453651685393258	0.122448979591837	0.170212765957447	0.0933333333333333	8.84692402689519	27.6333764429521
7	10	TimeSequenceTH	4	575	780	144	144	0	0.0958904109589041	0.184615384615385	0.282051282051282	0.205882352941176	0	0.0921985815602837	6.92164101908317	22.2274940337817
7	10	TimeSequenceTH	1	174	159	33	33	0	0.155172413793103	0.207547169811321	0.389937106918239	0.220338983050847	0.0625	0.0833333333333333	5.2526614073524	18.5253644884289
7	10	TimeSequenceTH	2	304	534	162	162	0	0.214285714285714	0.303370786516854	0.49063670411985	0.19047619047619	0.161290322580645	0.2	9.03557287136708	26.9061451706
7	10	TimeSequenceTH	2	301	440	114	114	0	0.135416666666667	0.259090909090909	0.386363636363636	0.261904761904762	0.127659574468085	0.115384615384615	8.51481435006744	26.8263463543265
7	10	TimeSequenceTH	2	342	457	112	112	0	0.157706093189964	0.24507658643326	0.354485776805252	0.102564102564103	0.0384615384615385	0.14207650273224	7.23255048271321	24.6746183439024
7	10	TimeSequenceTH	3	291	290	81	81	0	0.149122807017544	0.279310344827586	0.386206896551724	0.255813953488372	0.0227272727272727	0.139130434782609	6.97240211688998	23.2262878036996
7	10	TimeSequenceTH	1	246	338	120	120	0	0.192982456140351	0.355029585798817	0.529585798816568	0.26530612244898	0.21875	0.0864197530864197	7.4566598194615	24.9590195448734
7	10	TimeSequenceTH	2	321	565	116	116	0	0.133093525179856	0.205309734513274	0.315044247787611	0.135135135135135	0.107142857142857	0.133333333333333	7.76877762996133	25.9861703699721
7	10	TimeSequenceTH	3	307	456	103	103	0	0.122222222222222	0.225877192982456	0.359649122807018	0.138888888888889	0.16	0.0709677419354839	8.13253454594936	25.6627222343977
7	10	TimeSequenceTH	1	259	211	31	31	0	0.0886075949367089	0.146919431279621	0.33175355450237	0.163265306122449	0.125	0.0384615384615385	5.65992549387027	20.3242734976546
7	10	TimeSequenceTH	1	223	310	118	118	0	0.270967741935484	0.380645161290323	0.583870967741935	0.228070175438596	0.235294117647059	0.305555555555556	8.74783850979621	26.9297824807667
7	10	TimeSequenceTH	2	367	333	63	63	0	0.108	0.189189189189189	0.264264264264264	0.0769230769230769	0	0.0702702702702703	5.82888154454139	21.2652124290434
7	10	TimeSequenceTH	4	307	518	141	141	0	0.193979933110368	0.272200772200772	0.438223938223938	0.317460317460317	0.122448979591837	0.160621761658031	9.45500881990096	29.1827208153921
7	10	TimeSequenceTH	2	319	486	132	132	0	0.119718309859155	0.271604938271605	0.407407407407407	0.1875	0.125	0.0957446808510638	9.47620449929554	28.8494298913332
7	10	TimeSequenceTH	2	299	385	93	93	0	0.1284046692607	0.241558441558442	0.371428571428571	0.25	0.111111111111111	0.105263157894737	6.83097287857287	24.1050938680008
7	10	TimeSequenceTH	1	185	229	68	68	0	0.223214285714286	0.296943231441048	0.576419213973799	0.346153846153846	0.153846153846154	0.0833333333333333	7.32213400976436	24.7337505932516
7	10	TimeSequenceTH	4	323	678	262	262	0	0.252396166134185	0.386430678466077	0.517699115044248	0.542857142857143	0.25	0.207865168539326	9.45111401071412	29.1985023887066
7	10	TimeSequenceTH	1	282	473	145	145	0	0.204724409448819	0.306553911205074	0.477801268498943	0.314814814814815	0.075	0.193333333333333	9.097809841053	28.8575627478718
7	10	TimeSequenceTH	3	248	368	119	119	0	0.164772727272727	0.323369565217391	0.513586956521739	0.229166666666667	0.146341463414634	0.133333333333333	8.76343178562231	28.3992974513753
7	10	TimeSequenceTH	1	276	401	89	89	0	0.103092783505155	0.221945137157107	0.471321695760599	0.05	0.0526315789473684	0.137614678899083	7.56821630649151	25.1186615455186
7	10	TimeSequenceTH	2	260	405	128	128	0	0.160493827160494	0.316049382716049	0.446913580246914	0.254901960784314	0.133333333333333	0.149122807017544	8.84282173452802	28.2839216133947
7	10	TimeSequenceTH	2	248	337	95	95	0	0.196531791907514	0.281899109792285	0.483679525222552	0.166666666666667	0.0975609756097561	0.184615384615385	9.5600881932186	30.5110590196312
7	10	TimeSequenceTH	3	367	527	144	144	0	0.130030959752322	0.273244781783681	0.417457305502846	0.204545454545455	0.102564102564103	0.110091743119266	8.6626408682864	27.2500800111122
7	10	TimeSequenceTH	4	446	434	43	43	0	0.0634517766497462	0.0990783410138249	0.186635944700461	0.135135135135135	0.127659574468085	0.0418006430868167	6.55206063386615	22.7435430272889
7	10	TimeSequenceTH	5	405	536	135	135	0	0.183381088825215	0.251865671641791	0.373134328358209	0.418604651162791	0.113207547169811	0.13302752293578	8.8067753415354	28.1514507952772
7	10	TimeSequenceTH	1	385	500	140	140	0	0.129151291512915	0.28	0.452	0.15625	0.0930232558139535	0.10752688172043	8.51868234064767	27.1399358506293
7	10	TimeSequenceTH	3	328	371	94	94	0	0.181069958847737	0.253369272237197	0.423180592991914	0.119047619047619	0.131147540983607	0.140350877192982	8.50133936444484	26.7784206499287
7	10	TimeSequenceTH	5	347	437	61	61	0	0.106666666666667	0.139588100686499	0.276887871853547	0.177777777777778	0.128205128205128	0.0669856459330144	6.86060116562354	24.0110853179301
7	10	TimeSequenceTH	3	334	458	124	124	0	0.17056856187291	0.270742358078603	0.419213973799127	0.157894736842105	0.129032258064516	0.164772727272727	8.7121381899889	28.3815814106559
7	10	TimeSequenceTH	1	327	415	155	155	0	0.178571428571429	0.373493975903614	0.503614457831325	0.173913043478261	0.206896551724138	0.137142857142857	8.01291203841775	25.5659100050887
7	10	TimeSequenceTH	2	306	446	127	127	0	0.166666666666667	0.2847533632287	0.443946188340807	0.340909090909091	0.127659574468085	0.137254901960784	7.73989243269006	24.2285523106078
7	10	TimeSequenceTH	0	275	385	92	92	0	0.136150234741784	0.238961038961039	0.519480519480519	0.169811320754717	0.130434782608696	0.153846153846154	8.61718267881352	26.6740941101334
7	10	TimeSequenceTH	3	363	588	157	157	0	0.196480938416422	0.267006802721088	0.404761904761905	0.27906976744186	0.119402985074627	0.207207207207207	9.00079973230445	28.2333614769915
7	10	TimeSequenceTH	1	295	476	191	191	0	0.199134199134199	0.401260504201681	0.531512605042017	0.365853658536585	0.0285714285714286	0.189393939393939	8.93221399133131	27.7025788185653
7	10	TimeSequenceTH	2	314	550	160	160	0	0.177257525083612	0.290909090909091	0.429090909090909	0.242424242424242	0	0.164021164021164	8.65684551210205	26.5533926882398
7	10	TimeSequenceTH	1	292	365	133	133	0	0.318407960199005	0.364383561643836	0.542465753424658	0.411764705882353	0.204545454545455	0.325	7.69358391037854	25.447805725578
7	10	TimeSequenceTH	3	341	409	110	110	0	0.153558052434457	0.268948655256724	0.47921760391198	0.171428571428571	0.0333333333333333	0.153846153846154	7.57861817321379	26.138161988312
7	10	TimeSequenceTH	2	301	444	98	98	0	0.149812734082397	0.220720720720721	0.328828828828829	0.25	0.0625	0.143835616438356	8.32524885330466	28.2616002866148
7	10	TimeSequenceTH	0	252	340	80	80	0	0.176190476190476	0.235294117647059	0.4	0.222222222222222	0.0487804878048781	0.196581196581197	8.34993836971118	28.7383003588918
7	10	TimeSequenceTH	1	249	495	200	200	0	0.281385281385281	0.404040404040404	0.583838383838384	0.403508771929825	0.224489795918367	0.152542372881356	9.5741492483348	29.3469836393697
7	10	TimeSequenceTH	2	287	240	19	19	0	0.0421052631578947	0.0791666666666667	0.1625	0.0465116279069767	0.0869565217391304	0.0330578512396694	4.68416524265965	17.1064046303302
2	10	CorrelationDetector	5	529	863	37	37	0	0.0114503816793893	0.0428736964078795	0.106604866743917	0.0652173913043478	0.0178571428571429	0.00468384074941452	2.17516545933599	6.385938607642
2	10	CorrelationDetector	2	290	392	21	21	0	0.00749063670411985	0.0535714285714286	0.13265306122449	0.0377358490566038	0	0	1.93913312935861	5.99517021001041
7	10	TimeSequenceTH	5	366	412	64	64	0	0.0546075085324232	0.155339805825243	0.247572815533981	0.032258064516129	0.16	0.04	6.62807182276633	22.985788184091
7	10	TimeSequenceTH	3	228	364	90	90	0	0.121621621621622	0.247252747252747	0.505494505494505	0.196428571428571	0.0769230769230769	0.078125	7.45116487217294	24.2140423650471
7	10	TimeSequenceTH	2	224	391	93	93	0	0.128491620111732	0.237851662404092	0.421994884910486	0.13953488372093	0.159090909090909	0.0769230769230769	7.95101820695429	26.8582067803728
7	10	TimeSequenceTH	3	284	381	86	86	0	0.130681818181818	0.225721784776903	0.425196850393701	0.2	0.0769230769230769	0.125	6.90937236269354	21.9650190777006
7	10	TimeSequenceTH	1	242	233	57	57	0	0.19375	0.244635193133047	0.416309012875536	0.102040816326531	0.137931034482759	0.238636363636364	6.70145620982611	23.3176147027813
7	10	TimeSequenceTH	1	248	416	136	136	0	0.253521126760563	0.326923076923077	0.526442307692308	0.288461538461538	0.289473684210526	0.228260869565217	8.80851141768247	28.5107456243421
7	10	TimeSequenceTH	4	322	415	97	97	0	0.141221374045802	0.233734939759036	0.378313253012048	0.222222222222222	0.111111111111111	0.129213483146067	8.5819519072508	29.6544535574787
7	10	TimeSequenceTH	1	269	512	214	214	0	0.212765957446809	0.41796875	0.578125	0.290909090909091	0.184210526315789	0.175925925925926	9.53154554599813	28.1201269350391
7	10	TimeSequenceTH	2	233	382	102	102	0	0.167487684729064	0.267015706806283	0.445026178010471	0.145454545454545	0.106382978723404	0.174418604651163	9.09086285111946	28.4541376714473
7	10	TimeSequenceTH	3	395	535	98	98	0	0.0880681818181818	0.183177570093458	0.293457943925234	0.108695652173913	0.0444444444444444	0.0958333333333333	7.77796933653468	25.4736304354493
7	10	TimeSequenceTH	1	273	417	139	139	0	0.197424892703863	0.333333333333333	0.501199040767386	0.333333333333333	0.0714285714285714	0.193798449612403	9.80313920844371	30.2361574441455
7	10	TimeSequenceTH	3	215	422	173	173	0	0.237569060773481	0.409952606635071	0.599526066350711	0.388888888888889	0.170212765957447	0.148648648648649	9.95664779007241	30.2916006449952
7	10	TimeSequenceTH	1	265	567	209	209	0	0.207317073170732	0.368606701940035	0.55026455026455	0.518518518518518	0.0612244897959184	0.157407407407407	9.45272468027722	29.276312838883
7	10	TimeSequenceTH	1	227	179	43	43	0	0.123809523809524	0.240223463687151	0.441340782122905	0.0869565217391304	0.117647058823529	0.0961538461538462	7.37035875188863	25.3896346348944
10	10	TimeSequenceTH	3	228	482	204	204	0	0.325471698113208	0.423236514522822	0.560165975103734	0.444444444444444	0.266666666666667	0.24	12.3712370798035	33.0526317522415
10	10	TimeSequenceTH	1	300	417	146	146	0	0.215767634854772	0.350119904076739	0.489208633093525	0.209302325581395	0.216216216216216	0.188118811881188	11.937620281795	31.5940859296017
10	10	TimeSequenceTH	3	270	340	130	130	0	0.252577319587629	0.382352941176471	0.514705882352941	0.225	0.146341463414634	0.237623762376238	11.7188920117089	31.6548433809317
10	10	TimeSequenceTH	2	252	402	155	155	0	0.235	0.385572139303483	0.582089552238806	0.3	0.175	0.192982456140351	12.5944922110299	32.4507078573321
10	10	TimeSequenceTH	3	246	564	181	181	0	0.217948717948718	0.320921985815603	0.531914893617021	0.172413793103448	0.150943396226415	0.270491803278689	12.8352292228923	33.222905504911
10	10	TimeSequenceTH	0	210	273	106	106	0	0.274390243902439	0.388278388278388	0.586080586080586	0.235294117647059	0.152173913043478	0.352941176470588	11.6309215862648	31.4275664526631
10	10	TimeSequenceTH	0	211	217	92	92	0	0.319148936170213	0.423963133640553	0.617511520737327	0.414634146341463	0.3	0.294117647058824	9.70488353648962	29.1013769257101
10	10	TimeSequenceTH	0	236	337	168	168	0	0.271523178807947	0.498516320474777	0.697329376854599	0.306122448979592	0.1	0.0740740740740741	11.4338603259957	31.575624838319
10	10	TimeSequenceTH	1	216	357	136	136	0	0.204301075268817	0.380952380952381	0.521008403361345	0.22	0.166666666666667	0.142857142857143	10.8939633800723	28.6805540923145
10	10	TimeSequenceTH	0	276	386	174	174	0	0.251256281407035	0.450777202072539	0.639896373056995	0.222222222222222	0.117647058823529	0.320754716981132	12.8924299874621	34.1593524255219
10	10	TimeSequenceTH	2	258	348	94	94	0	0.219653179190751	0.270114942528736	0.46551724137931	0.153846153846154	0.179487179487179	0.147058823529412	10.5505656350241	29.2577210036223
10	10	TimeSequenceTH	4	405	641	128	128	0	0.101827676240209	0.199687987519501	0.365054602184087	0.122448979591837	0.212765957446809	0.0782312925170068	10.565515914454	29.3446836132662
10	10	TimeSequenceTH	0	233	195	69	69	0	0.2	0.353846153846154	0.553846153846154	0.155555555555556	0.2	0.259259259259259	10.2031840093342	32.0863748989353
10	10	TimeSequenceTH	3	264	348	116	116	0	0.172774869109948	0.333333333333333	0.502873563218391	0.270833333333333	0.0666666666666667	0.0882352941176471	9.8898367791527	27.9023970193995
10	10	TimeSequenceTH	1	226	211	58	58	0	0.181286549707602	0.274881516587678	0.431279620853081	0.246153846153846	0.142857142857143	0.136363636363636	10.3638136635938	30.211497358758
10	10	TimeSequenceTH	3	312	403	131	131	0	0.223107569721116	0.325062034739454	0.486352357320099	0.217391304347826	0.133333333333333	0.24390243902439	10.9447718460197	31.856553971254
10	10	TimeSequenceTH	1	309	334	112	112	0	0.266393442622951	0.335329341317365	0.467065868263473	0.161290322580645	0.222222222222222	0.267605633802817	10.4822182930379	30.44716258819
10	10	TimeSequenceTH	1	232	253	89	89	0	0.260869565217391	0.351778656126482	0.557312252964427	0.269230769230769	0.176470588235294	0.316455696202532	10.5014795937761	30.5156350149428
10	10	TimeSequenceTH	2	263	449	165	165	0	0.211009174311927	0.367483296213808	0.514476614699332	0.4375	0.134615384615385	0.151898734177215	8.78923285592259	24.2365918777467
10	10	TimeSequenceTH	1	320	311	58	58	0	0.140625	0.186495176848875	0.318327974276527	0.222222222222222	0.0833333333333333	0.117021276595745	9.74647982652034	29.4132852940182
10	10	TimeSequenceTH	2	337	283	87	87	0	0.276150627615063	0.307420494699647	0.508833922261484	0.272727272727273	0.136363636363636	0.285714285714286	9.64818123580989	28.4324915486197
10	10	TimeSequenceTH	1	223	255	104	104	0	0.226666666666667	0.407843137254902	0.556862745098039	0.428571428571429	0.0434782608695652	0.135593220338983	10.5621735947434	29.8998391574143
10	10	TimeSequenceTH	2	290	462	158	158	0	0.245901639344262	0.341991341991342	0.495670995670996	0.266666666666667	0.125	0.228571428571429	9.33146704767631	26.6080875405456
10	10	TimeSequenceTH	2	313	420	119	119	0	0.114814814814815	0.283333333333333	0.388095238095238	0.152173913043478	0.162790697674419	0.0967741935483871	10.2359685938338	29.4421166145217
10	10	TimeSequenceTH	4	328	690	262	262	0	0.216049382716049	0.379710144927536	0.530434782608696	0.4	0.1875	0.164251207729469	11.7597872819304	31.5355919043979
10	10	TimeSequenceTH	2	204	344	123	123	0	0.273255813953488	0.357558139534884	0.540697674418605	0.321428571428571	0.264705882352941	0.254901960784314	10.8304104833502	29.8274253512974
10	10	TimeSequenceTH	2	254	404	120	120	0	0.157142857142857	0.297029702970297	0.462871287128713	0.217391304347826	0.170212765957447	0.100917431192661	9.64704529256045	28.1060369986818
10	10	TimeSequenceTH	2	242	380	192	192	0	0.331460674157303	0.505263157894737	0.681578947368421	0.350877192982456	0.344827586206897	0.253968253968254	12.0577116405775	32.2660317943312
10	10	TimeSequenceTH	2	274	370	95	95	0	0.182242990654206	0.256756756756757	0.413513513513514	0.365384615384615	0.305555555555556	0.0625	9.7797567250583	27.5861303679197
10	10	TimeSequenceTH	1	282	233	51	51	0	0.132183908045977	0.218884120171674	0.386266094420601	0.263157894736842	0	0.114583333333333	8.05794753830693	24.4369126508828
10	10	TimeSequenceTH	0	249	266	91	91	0	0.203208556149733	0.342105263157895	0.462406015037594	0.25	0.229166666666667	0.172413793103448	9.29368557823573	27.3712739916966
10	10	TimeSequenceTH	4	315	381	126	126	0	0.171673819742489	0.330708661417323	0.47244094488189	0.292682926829268	0.114285714285714	0.139344262295082	10.2661396553315	29.0750250134403
10	10	TimeSequenceTH	5	274	443	135	135	0	0.158102766798419	0.304740406320542	0.494356659142212	0.173076923076923	0.122448979591837	0.15748031496063	10.9814513643518	30.3889271544504
10	10	TimeSequenceTH	0	149	278	123	123	0	0.238938053097345	0.442446043165468	0.719424460431655	0.260869565217391	0.208333333333333	0.1875	13.1395785323533	33.1585905307213
10	10	TimeSequenceTH	3	286	452	152	152	0	0.226950354609929	0.336283185840708	0.491150442477876	0.396551724137931	0.106382978723404	0.188679245283019	13.1376375781539	34.7318261311111
10	10	TimeSequenceTH	2	355	460	150	150	0	0.154929577464789	0.326086956521739	0.476086956521739	0.243243243243243	0.0666666666666667	0.16551724137931	11.3269557499749	30.7125031281626
10	10	TimeSequenceTH	1	244	302	107	107	0	0.292397660818713	0.354304635761589	0.582781456953642	0.291666666666667	0.30952380952381	0.197183098591549	11.5324645565259	31.0444549530932
10	10	TimeSequenceTH	3	280	385	132	132	0	0.178571428571429	0.342857142857143	0.52987012987013	0.22	0.15625	0.168	12.0865305716767	32.3292738721835
10	10	TimeSequenceTH	2	229	350	127	127	0	0.282828282828283	0.362857142857143	0.562857142857143	0.344262295081967	0.210526315789474	0.262626262626263	12.8470643650974	33.2142091959736
10	10	TimeSequenceTH	4	293	277	74	74	0	0.160220994475138	0.267148014440433	0.425992779783394	0.0714285714285714	0.208333333333333	0.0909090909090909	10.3401662417998	30.3369194331865
10	10	TimeSequenceTH	2	261	339	137	137	0	0.25	0.404129793510324	0.575221238938053	0.311111111111111	0.214285714285714	0.177777777777778	9.25382896356482	26.6266991009948
10	10	TimeSequenceTH	1	247	411	194	194	0	0.289473684210526	0.472019464720195	0.67639902676399	0.381818181818182	0.272727272727273	0.210526315789474	10.9787050970333	30.5483610406719
10	10	TimeSequenceTH	2	222	308	135	135	0	0.270833333333333	0.438311688311688	0.652597402597403	0.295454545454545	0.25	0.196078431372549	8.95973429267493	26.2609827427023
10	10	TimeSequenceTH	2	248	291	94	94	0	0.217105263157895	0.323024054982818	0.525773195876289	0.219512195121951	0.121212121212121	0.219178082191781	9.60634996362107	28.2513682412779
10	10	TimeSequenceTH	3	329	462	141	141	0	0.189003436426117	0.305194805194805	0.432900432900433	0.275	0.111111111111111	0.180790960451977	9.667302337923	27.8731507260578
10	10	TimeSequenceTH	2	283	348	78	78	0	0.0825242718446602	0.224137931034483	0.399425287356322	0.116279069767442	0.166666666666667	0.0564516129032258	8.73368291102391	26.1234690215929
10	10	TimeSequenceTH	2	235	243	105	105	0	0.2	0.432098765432099	0.625514403292181	0.25	0.0666666666666667	0.147540983606557	10.6407567561962	30.2426438501423
10	10	TimeSequenceTH	3	297	529	176	176	0	0.193771626297578	0.332703213610586	0.591682419659735	0.363636363636364	0.194029850746269	0.190909090909091	10.5768566976663	30.9264764029824
10	10	TimeSequenceTH	0	187	172	76	76	0	0.279569892473118	0.441860465116279	0.674418604651163	0.236363636363636	0.285714285714286	0.333333333333333	7.84437304461464	24.1691571324928
10	10	TimeSequenceTH	1	228	180	69	69	0	0.185185185185185	0.383333333333333	0.483333333333333	0.210526315789474	0.130434782608696	0.184210526315789	8.47276898152336	25.8100361323675
10	10	TimeSequenceTH	2	231	468	176	176	0	0.202970297029703	0.376068376068376	0.596153846153846	0.254237288135593	0.195652173913043	0.175257731958763	12.8230908347963	33.8418273097659
10	10	TimeSequenceTH	1	360	395	133	133	0	0.203703703703704	0.336708860759494	0.458227848101266	0.615384615384615	0.133333333333333	0.172413793103448	11.442055888145	31.8192158632772
10	10	TimeSequenceTH	1	213	271	147	147	0	0.363636363636364	0.542435424354244	0.678966789667897	0.382978723404255	0.0869565217391304	0.392857142857143	10.0445506734252	29.0148908012405
10	10	TimeSequenceTH	4	349	544	210	210	0	0.205223880597015	0.386029411764706	0.558823529411765	0.25	0.162162162162162	0.16	11.9552700966605	32.4632988573172
10	10	TimeSequenceTH	3	302	422	143	143	0	0.171428571428571	0.338862559241706	0.568720379146919	0.229166666666667	0.363636363636364	0.115702479338843	11.3370692686227	30.7338719483687
10	10	TimeSequenceTH	1	249	445	205	205	0	0.263681592039801	0.460674157303371	0.6	0.357142857142857	0.321428571428571	0.205882352941176	12.846056191073	33.1710746767618
10	10	TimeSequenceTH	2	225	364	119	119	0	0.206896551724138	0.326923076923077	0.521978021978022	0.183333333333333	0.09375	0.171428571428571	12.0472803070893	31.0359778388162
10	10	TimeSequenceTH	1	182	164	76	76	0	0.278481012658228	0.463414634146341	0.701219512195122	0.28	0.176470588235294	0.285714285714286	9.38472751336761	27.1094978882241
10	10	TimeSequenceTH	1	308	551	184	184	0	0.216393442622951	0.333938294010889	0.511796733212341	0.403508771929825	0.0943396226415094	0.202127659574468	13.8342249577133	34.2764076299141
10	10	TimeSequenceTH	0	246	240	77	77	0	0.126666666666667	0.320833333333333	0.504166666666667	0.186046511627907	0.0625	0.2	9.15997737733484	27.0834259626012
20	10	TimeSequenceTH	1	250	442	269	269	0	0.324894514767932	0.608597285067873	0.687782805429864	0.473684210526316	0.184210526315789	0.355769230769231	19.5052486136129	36.5822100510548
20	10	TimeSequenceTH	1	185	314	165	165	0	0.317241379310345	0.525477707006369	0.738853503184713	0.39344262295082	0.137931034482759	0.295454545454545	18.4744768019975	36.6724278513129
20	10	TimeSequenceTH	1	172	313	190	190	0	0.439393939393939	0.60702875399361	0.706070287539936	0.516129032258065	0.387096774193548	0.351351351351351	18.0639639131726	36.786300696954
20	10	TimeSequenceTH	1	192	231	134	134	0	0.341085271317829	0.58008658008658	0.744588744588745	0.333333333333333	0.0666666666666667	0.291666666666667	18.8178031173126	38.6818651532479
20	10	TimeSequenceTH	1	216	285	146	146	0	0.367741935483871	0.512280701754386	0.670175438596491	0.524590163934426	0.333333333333333	0.242857142857143	17.2784389282924	36.0956354728331
20	10	TimeSequenceTH	0	198	227	158	158	0	0.401639344262295	0.696035242290749	0.788546255506608	0.523809523809524	0.4375	0.347826086956522	17.5909550354913	35.8104955326694
20	10	TimeSequenceTH	1	240	247	140	140	0	0.333333333333333	0.566801619433198	0.663967611336032	0.238095238095238	0.0714285714285714	0.325581395348837	15.1740876137647	32.06484753131
20	10	TimeSequenceTH	2	190	265	157	157	0	0.368852459016393	0.592452830188679	0.709433962264151	0.526315789473684	0.454545454545455	0.0952380952380952	16.7415247518044	34.6329738569549
20	10	TimeSequenceTH	0	201	140	90	90	0	0.432692307692308	0.642857142857143	0.735714285714286	0.446808510638298	0.307692307692308	0.333333333333333	15.3656905468542	33.1571643935234
20	10	TimeSequenceTH	0	223	234	145	145	0	0.316129032258064	0.61965811965812	0.696581196581197	0.46	0.133333333333333	0.239130434782609	18.8576324267524	37.4926952288144
20	10	TimeSequenceTH	3	290	393	187	187	0	0.272388059701493	0.475826972010178	0.564885496183206	0.566666666666667	0.363636363636364	0.0933333333333333	17.3048001666049	34.499995835065
20	10	TimeSequenceTH	1	207	338	198	198	0	0.395061728395062	0.585798816568047	0.692307692307692	0.406779661016949	0.285714285714286	0.30188679245283	18.1943378876937	37.2291780665011
20	10	TimeSequenceTH	1	202	243	140	140	0	0.349315068493151	0.576131687242798	0.724279835390947	0.403846153846154	0.32	0.238095238095238	16.8694441488045	34.7092595268907
20	10	TimeSequenceTH	0	175	298	196	196	0	0.554744525547445	0.657718120805369	0.812080536912752	0.672727272727273	0.476190476190476	0	17.2364374646128	35.9517396012006
20	10	TimeSequenceTH	1	185	149	81	81	0	0.454545454545455	0.543624161073825	0.691275167785235	0.418181818181818	0.3	0.36	16.3001924375539	34.0912219556444
20	10	TimeSequenceTH	0	186	263	172	172	0	0.452702702702703	0.653992395437262	0.82509505703422	0.446808510638298	0.411764705882353	0.227272727272727	17.425632642805	35.5756427663632
20	10	TimeSequenceTH	1	277	420	198	198	0	0.236734693877551	0.471428571428571	0.55	0.36	0.128205128205128	0.175572519083969	18.8716028313876	36.4390145009688
20	10	TimeSequenceTH	1	214	218	134	134	0	0.487394957983193	0.614678899082569	0.784403669724771	0.574074074074074	0.3125	0.4	18.2086720210047	37.5649728467887
20	10	TimeSequenceTH	0	184	220	136	136	0	0.539823008849557	0.618181818181818	0.813636363636364	0.63265306122449	0.444444444444444	0.454545454545455	16.2317902624702	33.6376781993214
20	10	TimeSequenceTH	0	184	227	153	153	0	0.488	0.674008810572687	0.766519823788546	0.5	0.333333333333333	0.352941176470588	16.6601224939711	35.0324122265318
20	10	TimeSequenceTH	1	227	276	197	197	0	0.467105263157895	0.713768115942029	0.797101449275362	0.421052631578947	0.214285714285714	0.375	17.5516119594639	37.684451022212
20	10	TimeSequenceTH	1	209	107	50	50	0	0.266666666666667	0.467289719626168	0.588785046728972	0.244897959183673	0	0.210526315789474	14.0986800766212	32.0371507353421
20	10	TimeSequenceTH	0	180	143	85	85	0	0.3375	0.594405594405594	0.79020979020979	0.391304347826087	0.133333333333333	0	14.369044579633	32.3869952214639
20	10	TimeSequenceTH	2	315	363	166	166	0	0.251028806584362	0.457300275482094	0.564738292011019	0.404255319148936	0.344827586206897	0.111111111111111	18.5779367850605	39.0762635144785
20	10	TimeSequenceTH	1	164	246	175	175	0	0.504132231404959	0.711382113821138	0.808943089430894	0.5	0.44	0.142857142857143	18.4889984502967	37.7416561638303
20	10	TimeSequenceTH	1	182	403	263	263	0	0.353383458646617	0.652605459057072	0.766749379652605	0.358208955223881	0.346153846153846	0.35	17.7253696983227	36.3970409982032
20	10	TimeSequenceTH	1	213	314	172	172	0	0.379888268156425	0.547770700636943	0.665605095541401	0.490909090909091	0.236842105263158	0.318181818181818	18.5505178466934	38.1790334877248
20	10	TimeSequenceTH	1	219	287	162	162	0	0.349397590361446	0.564459930313589	0.693379790940767	0.425531914893617	0.2	0.288888888888889	15.2598710782895	32.8019391359639
20	10	TimeSequenceTH	2	198	263	153	153	0	0.39344262295082	0.581749049429658	0.722433460076046	0.425925925925926	0.4	0.0714285714285714	17.985947347346	35.6308210018574
20	10	TimeSequenceTH	0	209	315	189	189	0	0.404255319148936	0.6	0.717460317460317	0.471698113207547	0.2	0.405405405405405	18.3853706341781	37.6915207664418
20	10	TimeSequenceTH	0	192	192	131	131	0	0.435643564356436	0.682291666666667	0.770833333333333	0.341463414634146	0.166666666666667	0.461538461538462	15.6294001024072	33.8045057634667
20	10	TimeSequenceTH	0	192	319	236	236	0	0.611650485436893	0.739811912225705	0.865203761755486	0.631578947368421	0.454545454545455	0.5	18.6833338991047	39.1154330549614
20	10	TimeSequenceTH	1	199	266	144	144	0	0.384615384615385	0.541353383458647	0.654135338345865	0.509090909090909	0.185185185185185	0.302325581395349	16.5108086227343	35.8868298374885
20	10	TimeSequenceTH	1	216	312	155	155	0	0.333333333333333	0.496794871794872	0.71474358974359	0.268292682926829	0.25	0.21875	15.6635833729793	34.6366273941811
20	10	TimeSequenceTH	1	157	204	134	134	0	0.333333333333333	0.656862745098039	0.779411764705882	0.292307692307692	0.3	0.3125	16.3122111978519	36.0262067961419
20	10	TimeSequenceTH	3	277	361	206	206	0	0.34	0.570637119113573	0.656509695290859	0.489795918367347	0.136363636363636	0.257142857142857	19.1456765868426	38.1084974940453
20	10	TimeSequenceTH	1	230	281	211	211	0	0.479166666666667	0.750889679715303	0.850533807829182	0.547619047619048	0.409090909090909	0.315789473684211	18.0761745441593	37.847356446032
20	10	TimeSequenceTH	0	170	277	190	190	0	0.427350427350427	0.685920577617328	0.776173285198556	0.508474576271186	0.424242424242424	0.0526315789473684	16.2023699259711	35.2878608988682
20	10	TimeSequenceTH	1	223	216	148	148	0	0.556818181818182	0.685185185185185	0.796296296296296	0.67741935483871	0.535714285714286	0.333333333333333	15.9954414013061	33.9654157026609
20	10	TimeSequenceTH	1	166	294	171	171	0	0.534653465346535	0.581632653061224	0.80952380952381	0.625	0.25	0.421052631578947	17.4621498648604	36.8836338383723
2	10	CorrelationDetector	2	304	317	8	8	0	0.00421940928270042	0.0252365930599369	0.0694006309148265	0.0256410256410256	0	0	0.41883839387408	0.0392150347070098
2	10	CorrelationDetector	2	248	214	3	3	0	0	0.014018691588785	0.135514018691589	0	0	0	0.804288271191238	0.287957035405908
20	10	TimeSequenceTH	1	265	334	190	190	0	0.333333333333333	0.568862275449102	0.754491017964072	0.311111111111111	0.130434782608696	0.224489795918367	16.3548187671954	34.6992887921127
20	10	TimeSequenceTH	2	226	321	205	205	0	0.380281690140845	0.638629283489097	0.744548286604361	0.648148148148148	0.227272727272727	0.181818181818182	16.6117466190274	34.7451373778641
20	10	TimeSequenceTH	1	232	285	163	163	0	0.401360544217687	0.571929824561404	0.708771929824561	0.527777777777778	0.25	0.345454545454545	16.7030063754051	37.0452795419461
20	10	TimeSequenceTH	1	251	390	190	190	0	0.331578947368421	0.487179487179487	0.594871794871795	0.377777777777778	0.19047619047619	0.333333333333333	15.899935524529	32.7683263393437
20	10	TimeSequenceTH	0	166	258	172	172	0	0.475728155339806	0.666666666666667	0.837209302325581	0.526315789473684	0.25	0.333333333333333	17.0919104378446	36.0156342971337
20	10	TimeSequenceTH	0	232	242	153	153	0	0.354838709677419	0.632231404958678	0.727272727272727	0.512820512820513	0.333333333333333	0.307692307692308	16.5291223944994	35.0026819985006
20	10	TimeSequenceTH	0	209	267	167	167	0	0.458715596330275	0.625468164794007	0.790262172284644	0.477272727272727	0.333333333333333	0.521739130434783	17.5087012831829	36.3591762142062
20	10	TimeSequenceTH	1	235	242	132	132	0	0.310810810810811	0.545454545454545	0.628099173553719	0.444444444444444	0.2	0.340909090909091	18.031648446929	37.0401936887258
20	10	TimeSequenceTH	1	210	164	112	112	0	0.406593406593407	0.682926829268293	0.829268292682927	0.488372093023256	0.294117647058824	0.333333333333333	15.5447451527734	33.7517824661718
20	10	TimeSequenceTH	1	209	321	213	213	0	0.461538461538462	0.663551401869159	0.750778816199377	0.592592592592593	0.303030303030303	0.347826086956522	18.6574183165529	37.433176998632
20	10	TimeSequenceTH	2	245	277	147	147	0	0.369426751592357	0.530685920577617	0.63898916967509	0.520833333333333	0.192307692307692	0.28	18.4379697777303	36.7668181831618
20	10	TimeSequenceTH	0	247	267	175	175	0	0.431654676258993	0.655430711610487	0.752808988764045	0.372093023255814	0.25	0.285714285714286	17.5921681155631	37.7214019078728
20	10	TimeSequenceTH	1	219	343	168	168	0	0.26027397260274	0.489795918367347	0.667638483965015	0.357142857142857	0.181818181818182	0.171428571428571	15.3666555644934	31.8115059237459
20	10	TimeSequenceTH	1	230	269	127	127	0	0.3125	0.472118959107807	0.650557620817844	0.37037037037037	0.0555555555555556	0.188679245283019	16.6773132374041	34.9272192362953
20	10	TimeSequenceTH	0	212	166	113	113	0	0.5	0.680722891566265	0.855421686746988	0.452380952380952	0.307692307692308	0.333333333333333	16.0729196995687	35.8118002411428
20	10	TimeSequenceTH	0	210	336	194	194	0	0.350282485875706	0.577380952380952	0.702380952380952	0.403225806451613	0.304347826086957	0.356164383561644	17.8235993052966	35.8625885970633
20	10	TimeSequenceTH	1	187	235	139	139	0	0.303571428571429	0.591489361702128	0.765957446808511	0.313725490196078	0.173913043478261	0.391304347826087	16.3428071917414	33.1875463602405
20	10	TimeSequenceTH	1	243	346	227	227	0	0.412060301507538	0.65606936416185	0.754335260115607	0.52	0.260869565217391	0.3	18.1234440767807	36.3067775953892
20	10	TimeSequenceTH	2	268	299	196	196	0	0.478787878787879	0.655518394648829	0.775919732441472	0.595238095238095	0.382352941176471	0.138888888888889	18.3912951049055	36.9102264789724
20	10	TimeSequenceTH	0	213	348	194	194	0	0.322981366459627	0.557471264367816	0.669540229885057	0.387755102040816	0.295454545454545	0.313725490196078	16.4140161812388	32.8363016288852
2	10	CorrelationDetector	5	584	715	9	9	0	0.0037593984962406	0.0125874125874126	0.0811188811188811	0	0	0.00425531914893617	1.39199427697634	3.08664839468206
2	10	CorrelationDetector	5	527	695	6	6	0	0	0.00863309352517986	0.0503597122302158	0	0	0	1.02884581461261	1.47338180954517
2	10	CorrelationDetector	6	495	755	13	13	0	0.00220264317180617	0.0172185430463576	0.0821192052980132	0.027027027027027	0	0	1.37793086681204	1.77459071126385
2	10	CorrelationDetector	2	333	403	17	17	0	0.0249110320284698	0.0421836228287841	0.166253101736973	0	0.025	0.027027027027027	2.11266202635715	6.30208181828035
2	10	CorrelationDetector	1	220	219	33	33	0	0.0298507462686567	0.150684931506849	0.219178082191781	0.0612244897959184	0	0.0166666666666667	2.01885153018985	4.15411551828341
2	10	CorrelationDetector	3	416	488	10	10	0	0.00817438692098093	0.0204918032786885	0.0778688524590164	0.0232558139534884	0	0.00352112676056338	2.02024186843308	3.81033481898813
2	10	CorrelationDetector	3	313	418	16	16	0	0.00952380952380952	0.0382775119617225	0.155502392344498	0.0434782608695652	0	0	1.65148831544242	2.80973882397374
2	10	CorrelationDetector	5	420	493	17	17	0	0.00280898876404494	0.0344827586206897	0.103448275862069	0.0238095238095238	0	0	2.02496832768873	5.03833570608454
2	10	CorrelationDetector	4	654	722	9	9	0	0.00772797527047913	0.0124653739612188	0.038781163434903	0	0	0.00920810313075507	1.55645399771267	2.00778162605957
2	10	CorrelationDetector	4	383	525	7	7	0	0.00271739130434783	0.0133333333333333	0.0990476190476191	0.0217391304347826	0	0	1.01236104641455	1.04294380102335
2	10	CorrelationDetector	2	327	303	6	6	0	0.0160642570281124	0.0198019801980198	0.0858085808580858	0	0.0416666666666667	0.0125786163522013	1.5352784438181	1.44096721438418
2	10	CorrelationDetector	2	349	332	8	8	0	0.0134228187919463	0.0240963855421687	0.0451807228915663	0.0677966101694915	0	0	1.06664940426845	0.381255336740596
2	10	CorrelationDetector	4	505	547	11	11	0	0.0165631469979296	0.020109689213894	0.0950639853747715	0.0512820512820513	0	0.0151515151515152	2.14110085725562	5.05106445692753
2	10	CorrelationDetector	4	368	567	17	17	0	0.00554016620498615	0.0299823633156966	0.107583774250441	0.0161290322580645	0	0.00377358490566038	1.82879532187077	4.0052496202655
3	10	CorrelationDetector	2	351	311	30	30	0	0.053639846743295	0.0964630225080386	0.308681672025723	0.0277777777777778	0.111111111111111	0.0201342281879195	4.11023199316952	16.8665120318472
3	10	CorrelationDetector	4	528	759	103	103	0	0.0296610169491525	0.13570487483531	0.310935441370224	0.14	0	0.00952380952380952	5.48963032291266	23.1917148152446
3	10	CorrelationDetector	2	384	560	121	121	0	0.106109324758842	0.216071428571429	0.401785714285714	0.137254901960784	0.05	0.0650887573964497	5.02796234721969	21.3118030701796
3	10	CorrelationDetector	1	272	368	42	42	0	0.0591397849462366	0.114130434782609	0.173913043478261	0.195652173913043	0	0.0181818181818182	3.78877654011706	16.9764138773512
3	10	CorrelationDetector	5	509	721	17	17	0	0.0102880658436214	0.0235783633841886	0.115117891816921	0.0454545454545455	0	0.00247524752475248	3.62319561543828	14.8243199798443
3	10	CorrelationDetector	3	264	235	32	32	0	0.08125	0.136170212765957	0.225531914893617	0.25	0	0	2.5275091256584	9.03629996849893
3	10	CorrelationDetector	1	216	156	10	10	0	0.0204081632653061	0.0641025641025641	0.115384615384615	0.04	0	0	1.56211599258368	3.58289398433396
3	10	CorrelationDetector	2	327	310	28	28	0	0.0320855614973262	0.0903225806451613	0.225806451612903	0.130434782608696	0	0.0152671755725191	2.14138356292673	6.86745941135634
3	10	CorrelationDetector	3	290	446	36	36	0	0.0311111111111111	0.0807174887892377	0.199551569506726	0.0638297872340425	0.0232558139534884	0.0144927536231884	2.38285197308485	7.55940495725793
3	10	CorrelationDetector	1	216	247	35	35	0	0.0437956204379562	0.1417004048583	0.263157894736842	0.0784313725490196	0.0333333333333333	0	2.33908070313061	8.01046791612131
3	10	CorrelationDetector	4	347	569	35	35	0	0.0337423312883436	0.0615114235500879	0.152899824253076	0.25	0.025974025974026	0	2.63818890956135	9.43093763102047
3	10	CorrelationDetector	2	343	287	6	6	0	0.00847457627118644	0.0209059233449477	0.0940766550522648	0.0555555555555556	0	0	1.9913103536629	5.13382881990739
3	10	CorrelationDetector	5	392	591	36	36	0	0.0077319587628866	0.0609137055837563	0.196277495769882	0.0681818181818182	0	0	3.22633445735794	11.4005332483892
3	10	CorrelationDetector	4	542	624	23	23	0	0.025	0.0368589743589744	0.125	0.0256410256410256	0.05	0.0206896551724138	3.0915163373012	11.8188539128389
3	10	CorrelationDetector	1	381	405	13	13	0	0.0130293159609121	0.0320987654320988	0.155555555555556	0.0571428571428571	0	0.00448430493273543	3.19681336650108	13.6056471983749
3	10	CorrelationDetector	1	245	366	28	28	0	0.0572916666666667	0.0765027322404372	0.158469945355191	0.0769230769230769	0.0588235294117647	0.0515463917525773	3.18423877286231	11.7363263265781
3	10	CorrelationDetector	4	416	489	50	50	0	0.0460358056265985	0.102249488752556	0.224948875255624	0.203703703703704	0.0333333333333333	0.0197368421052632	3.68494883304136	14.1618100970746
3	10	CorrelationDetector	5	409	624	40	40	0	0.00742574257425743	0.0641025641025641	0.181089743589744	0.0465116279069767	0	0.00350877192982456	3.47417434762409	13.0990974328601
3	10	CorrelationDetector	3	545	953	75	75	0	0.0265654648956357	0.0786988457502623	0.214060860440714	0.0697674418604651	0.0652173913043478	0.0184331797235023	4.08318518228722	16.6270396858437
3	10	CorrelationDetector	5	420	686	48	48	0	0.00244498777506112	0.0699708454810496	0.211370262390671	0	0	0.00341296928327645	3.19397267278168	11.3475242447934
3	10	CorrelationDetector	5	550	857	67	67	0	0.0259259259259259	0.0781796966161027	0.284714119019837	0.0555555555555556	0.0327868852459016	0.0225225225225225	4.74114072131315	20.0522816406845
3	10	CorrelationDetector	2	342	334	38	38	0	0.0277777777777778	0.11377245508982	0.212574850299401	0.0784313725490196	0	0.0113636363636364	4.3703935857988	19.8570203943091
3	10	CorrelationDetector	2	244	192	17	17	0	0.0441176470588235	0.0885416666666667	0.25	0.046875	0.0416666666666667	0.015625	4.12354933751574	18.9464549881244
3	10	CorrelationDetector	3	259	369	42	42	0	0.0627615062761506	0.113821138211382	0.233062330623306	0.133333333333333	0.0333333333333333	0.0289855072463768	3.43140357327441	15.1589937718725
3	10	CorrelationDetector	3	400	651	50	50	0	0.02088772845953	0.0768049155145929	0.178187403993856	0.0357142857142857	0.0294117647058824	0.013986013986014	2.71482337638135	9.12693470566284
3	10	CorrelationDetector	2	286	284	22	22	0	0.0224719101123595	0.0774647887323944	0.190140845070423	0.0857142857142857	0	0	2.64057458272837	10.0226857710993
3	10	CorrelationDetector	3	341	383	29	29	0	0.0151515151515152	0.0757180156657963	0.161879895561358	0.0454545454545455	0	0.00523560209424084	2.60503289402413	9.21400405396831
2	10	CorrelationDetector	1	249	232	18	18	0	0.032051282051282	0.0775862068965517	0.163793103448276	0.0697674418604651	0	0	2.2311395924466	5.11975978540935
2	10	CorrelationDetector	5	380	552	29	29	0	0.0187667560321716	0.052536231884058	0.135869565217391	0.0869565217391304	0.0181818181818182	0.00778210116731518	2.24422531909437	4.61910243809662
3	10	CorrelationDetector	3	420	544	44	44	0	0.03125	0.0808823529411765	0.170955882352941	0.0833333333333333	0	0.0264026402640264	3.38160997549381	12.2119788469845
3	10	CorrelationDetector	3	265	282	10	10	0	0.0192307692307692	0.0354609929078014	0.148936170212766	0.0212765957446809	0.0303030303030303	0.0192307692307692	3.53480089479558	14.7657170809459
3	10	CorrelationDetector	4	370	331	21	21	0	0.0319148936170213	0.0634441087613293	0.163141993957704	0.0232558139534884	0.0909090909090909	0.0191387559808612	2.60924213421183	9.20987989827775
3	10	CorrelationDetector	3	314	412	44	44	0	0.0431372549019608	0.106796116504854	0.242718446601942	0.192307692307692	0.0256410256410256	0	2.78540471363333	10.0573971380625
3	10	CorrelationDetector	2	341	431	29	29	0	0.0230769230769231	0.0672853828306264	0.17169373549884	0	0.0625	0.016304347826087	2.9248485971472	10.4635924963636
3	10	CorrelationDetector	3	448	654	24	24	0	0.0245098039215686	0.036697247706422	0.168195718654434	0.162162162162162	0.0512820512820513	0.003125	2.51745000944917	9.09315946402855
3	10	CorrelationDetector	3	287	472	32	32	0	0.0112781954887218	0.0677966101694915	0.177966101694915	0.05	0	0	2.28129495976266	8.93211197045139
3	10	CorrelationDetector	3	307	272	15	15	0	0.043956043956044	0.0551470588235294	0.136029411764706	0.153846153846154	0	0.016	2.26429531348348	7.45486170289442
3	10	CorrelationDetector	4	564	737	22	22	0	0.00910746812386157	0.0298507462686567	0.119402985074627	0.0625	0	0.00672645739910314	2.71410218361353	10.8861821788062
3	10	CorrelationDetector	3	346	428	28	28	0	0.00626959247648903	0.0654205607476635	0.16588785046729	0.0175438596491228	0	0	4.35861522930961	17.2471602630505
3	10	CorrelationDetector	5	412	514	58	58	0	0.0558375634517767	0.11284046692607	0.198443579766537	0.232142857142857	0.0277777777777778	0.0264900662251656	3.99726107660493	16.1540541031524
3	10	CorrelationDetector	4	363	458	18	18	0	0.0111731843575419	0.0393013100436681	0.170305676855895	0.0196078431372549	0.0344827586206897	0.00404858299595142	5.15233730143806	20.3238004101485
3	10	CorrelationDetector	2	401	569	37	37	0	0.0165289256198347	0.0650263620386643	0.212653778558875	0	0	0	2.67392587239396	9.31482432306957
3	10	CorrelationDetector	6	552	827	101	101	0	0.0567765567765568	0.122128174123337	0.244256348246675	0.268292682926829	0.0377358490566038	0.0183908045977011	4.08714105281322	16.9096319979338
3	10	CorrelationDetector	1	295	499	38	38	0	0.0185873605947955	0.0761523046092184	0.2625250501002	0.0652173913043478	0	0	3.99812796936585	15.5535728881598
3	10	CorrelationDetector	4	416	685	42	42	0	0.0129533678756477	0.0613138686131387	0.195620437956204	0.0476190476190476	0	0	2.4719930763862	9.23094291637717
3	10	CorrelationDetector	2	264	192	3	3	0	0.0065359477124183	0.015625	0.104166666666667	0	0	0.00952380952380952	1.72712385604124	6.33907467333057
3	10	CorrelationDetector	2	272	263	23	23	0	0.0353535353535354	0.0874524714828897	0.201520912547529	0.12	0	0	2.4470267567934	8.8443198183854
3	10	CorrelationDetector	3	376	722	83	83	0	0.0196078431372549	0.114958448753463	0.277008310249307	0.125	0.0232558139534884	0	2.75073085569828	10.3014981844423
3	10	CorrelationDetector	3	461	531	23	23	0	0.0181347150259067	0.0433145009416196	0.128060263653484	0.113636363636364	0	0.00623052959501558	2.05151880662933	8.37139746706582
3	10	CorrelationDetector	4	392	490	46	46	0	0.037037037037037	0.0938775510204082	0.2	0.075	0	0.0384615384615385	2.36544593494531	8.36782283825026
3	10	CorrelationDetector	3	423	617	23	23	0	0.00245700245700246	0.0372771474878444	0.189627228525122	0	0.0256410256410256	0	3.74648032322385	15.3379817671247
3	10	CorrelationDetector	3	312	551	73	73	0	0.0486111111111111	0.132486388384755	0.261343012704174	0.177777777777778	0.0588235294117647	0	3.11539466419399	13.0131045607447
3	10	CorrelationDetector	4	504	587	18	18	0	0.00659340659340659	0.030664395229983	0.0988074957410562	0.0357142857142857	0	0.00540540540540541	3.92215447295937	15.5314110437359
3	10	CorrelationDetector	3	295	335	15	15	0	0.00420168067226891	0.0447761194029851	0.17910447761194	0.0232558139534884	0	0	2.14103762788444	7.66717002975011
3	10	CorrelationDetector	5	398	526	14	14	0	0.00845070422535211	0.026615969581749	0.127376425855513	0.02	0	0.0072463768115942	2.13147028174024	7.36704433368148
3	10	CorrelationDetector	5	465	550	29	29	0	0.00505050505050505	0.0527272727272727	0.116363636363636	0.0303030303030303	0	0.003125	2.24988587830531	8.34198819202963
3	10	CorrelationDetector	6	536	615	19	19	0	0.0116279069767442	0.0308943089430894	0.128455284552846	0.027027027027027	0	0.0117924528301887	2.53087239324349	9.51833804777978
3	10	CorrelationDetector	2	282	269	10	10	0	0.0109289617486339	0.0371747211895911	0.16728624535316	0.0384615384615385	0	0	1.63537802872772	5.31562006490748
3	10	CorrelationDetector	3	365	363	9	9	0	0.0104529616724739	0.0247933884297521	0.146005509641873	0	0.0606060606060606	0	2.08175298279799	6.40693174588741
2	10	CorrelationDetector	6	494	782	8	8	0	0.00218818380743982	0.010230179028133	0.0882352941176471	0	0	0.00269541778975741	1.58304661046374	2.37132102045087
2	10	CorrelationDetector	3	352	538	2	2	0	0	0.00371747211895911	0.0464684014869888	0	0	0	0.928638527653108	1.15014264361399
3	10	CorrelationDetector	2	271	251	3	3	0	0.0106382978723404	0.0119521912350598	0.0956175298804781	0.0476190476190476	0	0	2.2454879523291	7.4267937503028
3	10	CorrelationDetector	2	294	279	18	18	0	0.0201005025125628	0.0645161290322581	0.189964157706093	0.0833333333333333	0.0476190476190476	0	2.34393213172699	9.19953974907248
3	10	CorrelationDetector	5	377	557	9	9	0	0.00615384615384615	0.0161579892280072	0.0682226211849192	0.0571428571428571	0	0	2.13804527585034	6.56654307401894
5	10	CorrelationDetector	6	505	616	62	62	0	0.0353430353430353	0.100649350649351	0.248376623376623	0.179487179487179	0.0163934426229508	0.021680216802168	7.22553123113106	25.0892769037142
5	10	CorrelationDetector	3	368	547	92	92	0	0.0464396284829721	0.16819012797075	0.414990859232175	0.0652173913043478	0.0810810810810811	0.0147783251231527	7.11591208905491	25.708895276267
5	10	CorrelationDetector	2	328	280	39	39	0	0.092511013215859	0.139285714285714	0.432142857142857	0.117647058823529	0	0	6.27353641068018	23.7802281610219
5	10	CorrelationDetector	2	360	457	43	43	0	0.0229508196721311	0.0940919037199125	0.319474835886214	0.0638297872340425	0	0.00520833333333333	6.35899190457052	22.772752552021
5	10	CorrelationDetector	2	304	416	63	63	0	0.0609318996415771	0.151442307692308	0.370192307692308	0.193548387096774	0.0833333333333333	0.00806451612903226	6.46742831373661	22.8280598351187
5	10	CorrelationDetector	0	242	241	58	58	0	0.0935251798561151	0.240663900414938	0.485477178423237	0.136363636363636	0	0.0217391304347826	5.0521361090085	19.6677954212733
5	10	CorrelationDetector	1	340	295	30	30	0	0.0301507537688442	0.101694915254237	0.355932203389831	0	0.05	0.00980392156862745	4.62953400370404	17.5607823541458
5	10	CorrelationDetector	2	314	389	35	35	0	0.0398671096345515	0.089974293059126	0.341902313624679	0.0576923076923077	0.025	0.0352112676056338	5.33035633263098	20.8255073690128
5	10	CorrelationDetector	2	505	528	46	46	0	0.0467289719626168	0.0871212121212121	0.28030303030303	0.0909090909090909	0.0238095238095238	0.0492957746478873	6.57177520839293	26.4705225950253
5	10	CorrelationDetector	0	216	179	44	44	0	0.087378640776699	0.245810055865922	0.541899441340782	0.111111111111111	0.125	0.0555555555555556	5.1110902779792	20.8747726677591
5	10	CorrelationDetector	3	359	439	24	24	0	0.0241691842900302	0.0546697038724374	0.259681093394077	0.137931034482759	0	0	5.45872160326994	19.8170949176315
5	10	CorrelationDetector	4	540	749	66	66	0	0.0237623762376238	0.0881174899866489	0.200267022696929	0.166666666666667	0.138888888888889	0	5.1434510378446	19.3390035073619
5	10	CorrelationDetector	2	268	354	125	125	0	0.220994475138122	0.353107344632768	0.584745762711864	0.62	0	0.055045871559633	6.71601428171462	24.4258020875029
5	10	CorrelationDetector	5	352	534	82	82	0	0.0199335548172757	0.153558052434457	0.331460674157303	0.133333333333333	0	0	6.21772442756357	22.7325551560164
5	10	CorrelationDetector	2	272	539	132	132	0	0.108910891089109	0.244897959183673	0.530612244897959	0.333333333333333	0	0	6.47752302786259	22.7487850544132
5	10	CorrelationDetector	1	233	242	87	87	0	0.239130434782609	0.359504132231405	0.537190082644628	0.209302325581395	0.1875	0.142857142857143	7.14337411085782	26.7016984007641
5	10	CorrelationDetector	3	421	576	67	67	0	0.0625	0.116319444444444	0.269097222222222	0.166666666666667	0.0384615384615385	0.0538461538461538	7.87258272874953	28.9236570811083
5	10	CorrelationDetector	1	263	233	26	26	0	0.0395480225988701	0.111587982832618	0.300429184549356	0.0727272727272727	0	0.021978021978022	6.76638141800013	25.2494647753398
5	10	CorrelationDetector	2	347	449	26	26	0	0.0153374233128834	0.0579064587973274	0.278396436525612	0.02	0.0181818181818182	0.00900900900900901	6.64752244267535	24.3061728567946
5	10	CorrelationDetector	4	331	378	21	21	0	0.0189393939393939	0.0555555555555556	0.208994708994709	0.1	0.0256410256410256	0	4.6702219750832	18.221556313784
5	10	CorrelationDetector	1	201	310	97	97	0	0.120253164556962	0.312903225806452	0.57741935483871	0.222222222222222	0	0.0408163265306122	7.43487393995312	27.3204579799458
5	10	CorrelationDetector	4	332	489	83	83	0	0.022140221402214	0.169734151329243	0.445807770961145	0.0816326530612245	0.0344827586206897	0	7.55436339772272	28.428918935762
5	10	CorrelationDetector	2	334	589	103	103	0	0.0551948051948052	0.174872665534805	0.390492359932088	0.25531914893617	0.0357142857142857	0.00980392156862745	7.90633683595188	27.253435194196
5	10	CorrelationDetector	4	453	569	61	61	0	0.0366748166259169	0.107205623901582	0.279437609841828	0.0540540540540541	0.0277777777777778	0.0314685314685315	7.01350063466448	25.9839640137578
5	10	CorrelationDetector	0	213	212	60	60	0	0.155339805825243	0.283018867924528	0.481132075471698	0.204545454545455	0.0909090909090909	0.0701754385964912	4.62292388129271	17.5722962769901
5	10	CorrelationDetector	3	430	500	23	23	0	0.0174927113702624	0.046	0.18	0.0232558139534884	0	0.0168350168350168	4.64211685108451	17.9606939281882
5	10	CorrelationDetector	2	329	499	89	89	0	0.072463768115942	0.178356713426854	0.342685370741483	0.125	0.0857142857142857	0.0184049079754601	6.03364401750744	22.8813898037689
5	10	CorrelationDetector	0	191	150	37	37	0	0.192307692307692	0.246666666666667	0.566666666666667	0.207547169811321	0.2	0.0909090909090909	4.98092848997694	18.5942395838169
5	10	CorrelationDetector	1	236	179	26	26	0	0.036036036036036	0.145251396648045	0.329608938547486	0.0476190476190476	0.04	0	4.41822048227345	17.4063772026091
5	10	CorrelationDetector	2	338	379	68	68	0	0.116279069767442	0.179419525065963	0.382585751978892	0.125	0.0512820512820513	0.013986013986014	6.18432817273333	23.3505172479795
5	10	CorrelationDetector	2	291	341	41	41	0	0.025974025974026	0.120234604105572	0.313782991202346	0.104166666666667	0.0263157894736842	0	6.18020438897753	22.8564710849015
5	10	CorrelationDetector	5	418	641	119	119	0	0.0721393034825871	0.185647425897036	0.416536661466459	0.302325581395349	0.0333333333333333	0.0114942528735632	6.95921732858964	25.0488450271305
5	10	CorrelationDetector	2	464	628	75	75	0	0.06	0.119426751592357	0.299363057324841	0.173076923076923	0.0689655172413793	0.0449438202247191	6.33789840433515	22.623017703369
5	10	CorrelationDetector	5	299	475	71	71	0	0.102661596958175	0.149473684210526	0.44421052631579	0.333333333333333	0.0454545454545455	0.0232558139534884	7.06926035070328	26.9378666071788
5	10	CorrelationDetector	3	298	364	52	52	0	0.0845070422535211	0.142857142857143	0.354395604395604	0.0285714285714286	0.104166666666667	0.0857142857142857	5.63289331630098	19.9615861298162
5	10	CorrelationDetector	1	323	425	72	72	0	0.0659722222222222	0.169411764705882	0.298823529411765	0.189189189189189	0	0.0628930817610063	3.94510537829421	14.7740356213278
5	10	CorrelationDetector	6	507	703	38	38	0	0.0328542094455852	0.0540540540540541	0.187766714082504	0.121212121212121	0	0.0155440414507772	5.08533858416323	19.657659835754
5	10	CorrelationDetector	3	263	216	31	31	0	0.0308641975308642	0.143518518518519	0.240740740740741	0.0952380952380952	0	0	4.17449398435594	15.7631126083279
5	10	CorrelationDetector	5	438	536	50	50	0	0.0179028132992327	0.0932835820895522	0.235074626865672	0.0652173913043478	0	0.0132450331125828	5.52664737660938	20.107531598476
5	10	CorrelationDetector	2	416	427	19	19	0	0.00828729281767956	0.0444964871194379	0.175644028103044	0.0344827586206897	0	0	3.84227130877939	15.6577468175834
5	10	CorrelationDetector	3	348	300	28	28	0	0.0231660231660232	0.0933333333333333	0.15	0.15	0	0	3.43387345388408	12.7071407667576
5	10	CorrelationDetector	4	344	512	59	59	0	0.0281124497991968	0.115234375	0.328125	0.108108108108108	0	0.0171428571428571	5.14457476374692	19.3473880389941
5	10	CorrelationDetector	2	437	561	28	28	0	0	0.0499108734402852	0.180035650623886	0	0	0	3.76334384301302	14.3017126352122
5	10	CorrelationDetector	5	414	502	43	43	0	0.0324189526184539	0.0856573705179283	0.227091633466135	0.184210526315789	0	0.0207612456747405	4.52127905954733	16.9632486775445
5	10	CorrelationDetector	2	371	542	75	75	0	0.0373831775700935	0.138376383763838	0.333948339483395	0.0810810810810811	0.127272727272727	0.00900900900900901	4.53380556835898	17.068915973743
2	10	CorrelationDetector	2	273	222	11	11	0	0.0294117647058824	0.0495495495495495	0.189189189189189	0.05	0	0.0192307692307692	2.36092719550784	7.04005198004001
2	10	CorrelationDetector	4	385	451	7	7	0	0	0.0155210643015521	0.124168514412417	0	0	0	1.84433333702001	1.99379947242204
5	10	CorrelationDetector	2	409	482	75	75	0	0.0553935860058309	0.155601659751037	0.365145228215768	0.181818181818182	0	0.0504201680672269	5.98584105708691	23.0050393884027
5	10	CorrelationDetector	4	439	557	69	69	0	0.0432692307692308	0.123877917414722	0.308797127468582	0.254545454545455	0.0512820512820513	0.00313479623824451	6.96496798999337	24.4355854248074
5	10	CorrelationDetector	4	316	532	92	92	0	0.073482428115016	0.172932330827068	0.342105263157895	0.238095238095238	0.0212765957446809	0.0294117647058824	6.17790614705439	21.973402672083
5	10	CorrelationDetector	1	232	285	84	84	0	0.114093959731544	0.294736842105263	0.463157894736842	0.254545454545455	0.0769230769230769	0	5.3680994917849	19.9886287386652
5	10	CorrelationDetector	3	340	571	76	76	0	0.0698412698412698	0.133099824868651	0.302977232924694	0.297872340425532	0	0.0298507462686567	5.93245534421049	20.7174318415531
5	10	CorrelationDetector	3	434	415	22	22	0	0.0310734463276836	0.0530120481927711	0.190361445783133	0.210526315789474	0	0.00766283524904215	5.26651217326064	20.7494419261948
5	10	CorrelationDetector	3	321	564	91	91	0	0.0228013029315961	0.161347517730496	0.343971631205674	0.0483870967741935	0.0571428571428571	0.00943396226415094	6.37811080675084	23.4232449924618
5	10	CorrelationDetector	3	452	911	111	111	0	0.0324074074074074	0.121844127332602	0.28430296377607	0.229166666666667	0	0.00288184438040346	5.49508045880123	21.0361074764282
5	10	CorrelationDetector	1	228	161	10	10	0	0.0309278350515464	0.062111801242236	0.279503105590062	0	0.0384615384615385	0.0645161290322581	5.33495855643435	19.9849623019102
5	10	CorrelationDetector	3	294	432	56	56	0	0.0420168067226891	0.12962962962963	0.393518518518519	0.136363636363636	0.0256410256410256	0.0149253731343284	5.80949107713499	22.2278111294428
5	10	CorrelationDetector	4	363	520	72	72	0	0.0675675675675676	0.138461538461538	0.330769230769231	0.1	0.0232558139534884	0.0478723404255319	6.20213560368184	22.6474672673596
5	10	CorrelationDetector	4	394	657	110	110	0	0.0689655172413793	0.167427701674277	0.395738203957382	0.12	0.103448275862069	0.0572519083969466	5.92710753581721	21.1938309928341
5	10	CorrelationDetector	5	475	769	113	113	0	0.0626349892008639	0.146944083224967	0.306892067620286	0.283018867924528	0.0526315789473684	0.0336134453781513	6.36907043417378	22.920051390055
5	10	CorrelationDetector	2	352	357	19	19	0	0.0182481751824818	0.0532212885154062	0.266106442577031	0.0285714285714286	0.0625	0	5.13239572775008	18.6441888015451
5	10	CorrelationDetector	4	355	576	104	104	0	0.0911764705882353	0.180555555555556	0.482638888888889	0.214285714285714	0.0327868852459016	0.05	6.99764922541777	24.4617330409905
7	10	CorrelationDetector	2	374	402	69	69	0	0.0830670926517572	0.171641791044776	0.368159203980099	0.333333333333333	0	0.0365853658536585	6.77683326467528	22.1272746508357
7	10	CorrelationDetector	4	470	797	152	152	0	0.0529953917050691	0.190715181932246	0.442910915934755	0.142857142857143	0.0545454545454545	0.0412979351032448	8.3360775631814	27.2772311325949
7	10	CorrelationDetector	3	295	310	49	49	0	0.0604838709677419	0.158064516129032	0.348387096774194	0.0638297872340425	0.0526315789473684	0.0680272108843537	7.62084962020808	25.5102880134414
7	10	CorrelationDetector	0	293	534	144	144	0	0.123552123552124	0.269662921348315	0.5	0.307692307692308	0.0895522388059701	0.037037037037037	8.35551167556881	26.7901742939344
7	10	CorrelationDetector	4	403	603	73	73	0	0.0357142857142857	0.12106135986733	0.318407960199005	0.111111111111111	0.0238095238095238	0.024822695035461	8.2566980478922	26.5885112765092
7	10	CorrelationDetector	1	172	306	37	37	0	0.0625	0.120915032679739	0.398692810457516	0.101449275362319	0	0	6.86933904921483	23.546526286517
7	10	CorrelationDetector	2	356	347	30	30	0	0.0446096654275093	0.0864553314121038	0.380403458213256	0.114285714285714	0	0.0340909090909091	7.03225398415398	23.532953809779
7	10	CorrelationDetector	4	596	791	143	143	0	0.0556660039761431	0.18078381795196	0.393173198482933	0.0740740740740741	0.0434782608695652	0.0539325842696629	7.12929736619358	24.0043837603152
7	10	CorrelationDetector	1	313	370	57	57	0	0.0682730923694779	0.154054054054054	0.335135135135135	0.121951219512195	0.0384615384615385	0.04375	7.42133609467989	25.0680804370495
7	10	CorrelationDetector	3	329	445	49	49	0	0.0363036303630363	0.110112359550562	0.397752808988764	0.0769230769230769	0	0.0289855072463768	8.03614869928681	26.0226566811409
7	10	CorrelationDetector	1	242	334	54	54	0	0.0656565656565657	0.161676646706587	0.491017964071856	0.163265306122449	0.0303030303030303	0.0377358490566038	7.28255095072788	23.8906997270937
7	10	CorrelationDetector	1	242	244	44	44	0	0.0578512396694215	0.180327868852459	0.504098360655738	0.171428571428571	0	0.0188679245283019	6.05743805708216	20.4407084097555
7	10	CorrelationDetector	3	330	631	116	116	0	0.0517799352750809	0.183835182250396	0.421553090332805	0.0847457627118644	0.03125	0.045662100456621	8.27922990648586	25.0304678600315
7	10	CorrelationDetector	2	234	274	53	53	0	0.0466666666666667	0.193430656934307	0.489051094890511	0.0727272727272727	0	0.0138888888888889	8.30609212609045	28.5389647565608
7	10	CorrelationDetector	3	395	639	90	90	0	0.0706806282722513	0.140845070422535	0.336463223787167	0.302325581395349	0.0697674418604651	0.037593984962406	6.59748138020994	22.6599967428996
7	10	CorrelationDetector	0	179	76	35	35	0	0.245283018867925	0.460526315789474	0.802631578947368	0.239130434782609	0.181818181818182	NaN	6.5370742593736	23.112506124236
7	10	CorrelationDetector	4	351	347	41	41	0	0.0176678445229682	0.118155619596542	0.30835734870317	0.0425531914893617	0.0434782608695652	0.00952380952380952	7.81864045373105	27.945913330101
7	10	CorrelationDetector	2	309	393	88	88	0	0.103053435114504	0.223918575063613	0.442748091603053	0.352941176470588	0.107142857142857	0.025	7.47738895000893	24.2279747169259
7	10	CorrelationDetector	2	433	476	97	97	0	0.176795580110497	0.203781512605042	0.403361344537815	0.115384615384615	0.117647058823529	0.104166666666667	7.41479189541066	25.7238011742859
7	10	CorrelationDetector	0	193	223	61	61	0	0.136363636363636	0.273542600896861	0.587443946188341	0.145833333333333	0	0	7.23402047327479	23.8799492062547
7	10	CorrelationDetector	2	394	402	39	39	0	0.0498442367601246	0.0970149253731343	0.365671641791045	0	0.0740740740740741	0.0309734513274336	7.62992289276945	26.6655731284299
7	10	CorrelationDetector	3	326	620	141	141	0	0.106451612903226	0.22741935483871	0.466129032258065	0.292682926829268	0.127272727272727	0.0340909090909091	9.70882036501609	28.7329830789428
7	10	CorrelationDetector	3	465	451	37	37	0	0.0607594936708861	0.082039911308204	0.35920177383592	0.0681818181818182	0	0.0652173913043478	8.28498940487361	25.9085619297309
7	10	CorrelationDetector	3	380	547	68	68	0	0.0606060606060606	0.124314442413163	0.449725776965265	0.157894736842105	0	0.05	9.85581598438963	29.8359672137191
7	10	CorrelationDetector	3	332	440	49	49	0	0.0305343511450382	0.111363636363636	0.402272727272727	0.138888888888889	0.0588235294117647	0	7.68753043618807	25.4599782642435
7	10	CorrelationDetector	2	343	607	118	118	0	0.0885245901639344	0.194398682042834	0.436573311367381	0.176470588235294	0.129032258064516	0.0430622009569378	7.84064889553365	25.6444537053489
7	10	CorrelationDetector	2	261	464	113	113	0	0.0963302752293578	0.243534482758621	0.530172413793103	0.304347826086957	0	0	7.84744117273167	25.1905550703633
7	10	CorrelationDetector	2	526	493	43	43	0	0.0401891252955083	0.0872210953346856	0.354969574036511	0.0606060606060606	0.0666666666666667	0.039039039039039	8.34592705008231	26.5263234314618
7	10	CorrelationDetector	4	422	652	62	62	0	0.0297029702970297	0.0950920245398773	0.375766871165644	0.224489795918367	0	0.0034965034965035	8.94679929591655	28.8789795131385
7	10	CorrelationDetector	0	254	324	79	79	0	0.16	0.243827160493827	0.589506172839506	0.216666666666667	0.0555555555555556	0	8.90934219618689	28.8994394458216
7	10	CorrelationDetector	3	233	306	52	52	0	0.0958083832335329	0.169934640522876	0.562091503267974	0.169491525423729	0.0454545454545455	0.0568181818181818	9.0735395329458	28.0302289733903
7	10	CorrelationDetector	3	445	465	52	52	0	0.0452261306532663	0.111827956989247	0.324731182795699	0.0526315789473684	0.0606060606060606	0.0381944444444444	8.95883755290609	29.5543028653067
7	10	CorrelationDetector	1	206	251	71	71	0	0.0723684210526316	0.282868525896414	0.49003984063745	0.145161290322581	0.0454545454545455	0	8.38748173121931	28.2162601358837
7	10	CorrelationDetector	4	371	476	106	106	0	0.122905027932961	0.222689075630252	0.411764705882353	0.109090909090909	0	0.0572916666666667	10.3090654478509	30.9571704299524
7	10	CorrelationDetector	4	331	392	71	71	0	0.0763636363636364	0.181122448979592	0.433673469387755	0.264705882352941	0.119047619047619	0.0222222222222222	8.9603955674264	28.6652275786573
7	10	CorrelationDetector	3	326	559	143	143	0	0.118773946360153	0.255813953488372	0.493738819320215	0.195652173913043	0.03125	0.0888888888888889	9.12337344001392	29.493598999223
7	10	CorrelationDetector	1	197	275	76	76	0	0.138211382113821	0.276363636363636	0.578181818181818	0.176470588235294	0.121212121212121	0.0869565217391304	8.26477068739735	27.5213127377074
7	10	CorrelationDetector	2	383	482	170	170	0	0.0659722222222222	0.352697095435685	0.612033195020747	0.238095238095238	0.0434782608695652	0.0116279069767442	9.89824779557519	31.3212735275247
7	10	CorrelationDetector	3	360	463	95	95	0	0.0780141843971631	0.205183585313175	0.475161987041037	0.185185185185185	0.1	0.03125	8.0493071024443	25.1274228804119
7	10	CorrelationDetector	5	500	697	137	137	0	0.0858369098712446	0.196556671449067	0.500717360114778	0.325581395348837	0.0555555555555556	0.0619469026548673	11.2760265150059	33.6159706001847
7	10	CorrelationDetector	2	289	744	228	228	0	0.154121863799283	0.306451612903226	0.561827956989247	0.338983050847458	0.0980392156862745	0.0754716981132075	10.4048866403818	31.7141557634661
7	10	CorrelationDetector	1	276	460	181	181	0	0.151041666666667	0.393478260869565	0.680434782608696	0.310344827586207	0.0769230769230769	0.0384615384615385	9.04272649020468	28.483195056402
7	10	CorrelationDetector	0	256	313	85	85	0	0.114832535885167	0.271565495207668	0.472843450479233	0.267857142857143	0	0.0683760683760684	8.79961836578533	28.164424552132
7	10	CorrelationDetector	2	369	478	61	61	0	0.0536912751677852	0.127615062761506	0.393305439330544	0.162162162162162	0	0.0410958904109589	7.7118460706431	25.5609933572128
7	10	CorrelationDetector	1	238	277	53	53	0	0.140625	0.191335740072202	0.465703971119134	0.160714285714286	0.0344827586206897	0.075	9.1036798771327	30.1990941516966
7	10	CorrelationDetector	2	276	303	79	79	0	0.147619047619048	0.260726072607261	0.442244224422442	0.230769230769231	0	0.0686274509803922	8.32904012870177	25.9517675266615
7	10	CorrelationDetector	4	382	652	154	154	0	0.0613333333333333	0.236196319018405	0.450920245398773	0.170212765957447	0.109375	0.0264150943396226	10.2139949910973	31.329167646453
7	10	CorrelationDetector	2	307	482	93	93	0	0.0703703703703704	0.192946058091286	0.466804979253112	0.184210526315789	0.0784313725490196	0.01875	8.44101749240892	25.7758900618575
7	10	CorrelationDetector	1	257	202	55	55	0	0.0873015873015873	0.272277227722772	0.46039603960396	0.175	0.125	0.028169014084507	6.89564323194549	23.1845603103579
2	10	CorrelationDetector	2	364	360	54	54	0	0.0511945392491468	0.15	0.25	0.230769230769231	0	0.0202702702702703	2.82140473609764	3.90751363781251
2	10	CorrelationDetector	0	273	293	40	40	0	0.0294117647058824	0.136518771331058	0.245733788395904	0	0.0285714285714286	0	2.9579318921916	6.87970769876544
7	10	CorrelationDetector	3	339	348	39	39	0	0.0511811023622047	0.112068965517241	0.281609195402299	0.192307692307692	0.0392156862745098	0.0246913580246914	6.67070275982445	22.8152620256464
7	10	CorrelationDetector	0	249	312	49	49	0	0.0352941176470588	0.157051282051282	0.458333333333333	0.0784313725490196	0	0.0111111111111111	7.7874164204965	24.1915445509283
7	10	CorrelationDetector	4	308	415	63	63	0	0.0144927536231884	0.151807228915663	0.366265060240964	0.0588235294117647	0	0	7.66953812683834	25.5942481273839
7	10	CorrelationDetector	3	343	523	101	101	0	0.0781758957654723	0.193116634799235	0.391969407265774	0.210526315789474	0.0588235294117647	0.055	7.82480350498531	24.9626099736733
7	10	CorrelationDetector	3	446	437	41	41	0	0.0417754569190601	0.0938215102974828	0.318077803203661	0.0344827586206897	0.0833333333333333	0.0351437699680511	7.34719368515609	24.4800677671308
7	10	CorrelationDetector	4	404	628	78	78	0	0.0380710659898477	0.124203821656051	0.307324840764331	0.119047619047619	0.0645161290322581	0	7.84651101004847	25.4606659437985
7	10	CorrelationDetector	2	274	334	79	79	0	0.0695652173913043	0.236526946107784	0.383233532934132	0.1875	0	0.040650406504065	7.84917932928696	24.8334989182731
7	10	CorrelationDetector	2	228	260	33	33	0	0.0440251572327044	0.126923076923077	0.419230769230769	0.0416666666666667	0	0.08	6.27777375845768	22.1509272108014
7	10	CorrelationDetector	3	572	653	62	62	0	0.0620567375886525	0.0949464012251149	0.303215926493109	0.173913043478261	0.102564102564103	0.0436681222707424	8.19589528254865	25.7101770775917
7	10	CorrelationDetector	4	366	463	69	69	0	0.0996677740863787	0.14902807775378	0.39524838012959	0.36	0.0615384615384615	0.00574712643678161	7.26337115538683	25.308214085858
7	10	CorrelationDetector	2	290	408	72	72	0	0.0754716981132075	0.176470588235294	0.514705882352941	0.153846153846154	0.0952380952380952	0.049645390070922	6.35934631900283	22.1236971613695
7	10	CorrelationDetector	2	268	435	83	83	0	0.012987012987013	0.190804597701149	0.397701149425287	0.0535714285714286	0	0	7.40557831514453	25.0982598331061
7	10	CorrelationDetector	2	296	386	60	60	0	0.107407407407407	0.155440414507772	0.430051813471503	0.148148148148148	0.0727272727272727	0.103896103896104	8.14836121417908	25.3919681449401
7	10	CorrelationDetector	3	322	307	39	39	0	0.0585774058577406	0.127035830618893	0.286644951140065	0.127659574468085	0	0.00602409638554217	6.44948411721976	21.2480721984673
10	10	CorrelationDetector	3	376	482	146	146	0	0.141935483870968	0.302904564315353	0.516597510373444	0.48780487804878	0.0285714285714286	0.0634146341463415	13.3841224283039	34.5338644183493
10	10	CorrelationDetector	0	203	284	119	119	0	0.239520958083832	0.419014084507042	0.690140845070423	0.392857142857143	0.0909090909090909	0.0980392156862745	14.0376950493319	35.5688163891179
10	10	CorrelationDetector	2	366	444	79	79	0	0.0892307692307692	0.177927927927928	0.457207207207207	0.119047619047619	0.0487804878048781	0.0412844036697248	14.1467818650733	38.7109048288664
10	10	CorrelationDetector	1	261	203	20	20	0	0.0481927710843374	0.0985221674876847	0.399014778325123	0.121212121212121	0	0	7.85220764030836	23.9710376352719
10	10	CorrelationDetector	3	281	375	124	124	0	0.127962085308057	0.330666666666667	0.594666666666667	0.351851851851852	0.0588235294117647	0.0437956204379562	12.8510582847002	33.7898628642122
10	10	CorrelationDetector	1	268	361	60	60	0	0.0473684210526316	0.166204986149584	0.448753462603878	0.134615384615385	0	0.0161290322580645	11.9240662902853	32.1707096718124
10	10	CorrelationDetector	2	239	384	141	141	0	0.182741116751269	0.3671875	0.606770833333333	0.352941176470588	0.0909090909090909	0.0803571428571429	11.9629883008214	32.5947103916756
10	10	CorrelationDetector	2	271	360	137	137	0	0.156398104265403	0.380555555555556	0.541666666666667	0.327272727272727	0.142857142857143	0.0526315789473684	13.19558333667	32.8744954202134
10	10	CorrelationDetector	1	215	197	60	60	0	0.224806201550388	0.304568527918782	0.49238578680203	0.362068965517241	0.0416666666666667	0.0980392156862745	10.8248839214261	30.157798941897
10	10	CorrelationDetector	1	252	222	62	62	0	0.139393939393939	0.279279279279279	0.599099099099099	0.358490566037736	0	0.0454545454545455	10.8745990582483	31.4956244871882
10	10	CorrelationDetector	1	278	276	98	98	0	0.168421052631579	0.355072463768116	0.579710144927536	0.363636363636364	0	0.105263157894737	10.3094585980211	29.036051081675
10	10	CorrelationDetector	1	203	95	37	37	0	0.157142857142857	0.389473684210526	0.557894736842105	0.209302325581395	0.125	0	6.74052814450144	21.2535822254244
10	10	CorrelationDetector	1	237	391	134	134	0	0.154255319148936	0.342710997442455	0.618925831202046	0.327272727272727	0.111111111111111	0.0377358490566038	10.8355121108169	29.1391621819301
10	10	CorrelationDetector	3	408	459	54	54	0	0.0309859154929577	0.117647058823529	0.396514161220044	0.0697674418604651	0	0.0176991150442478	10.5206888166772	29.322060680137
10	10	CorrelationDetector	0	233	245	50	50	0	0.0823529411764706	0.204081632653061	0.453061224489796	0.192307692307692	0	0	9.85426341315141	26.9016570803828
10	10	CorrelationDetector	3	290	287	49	49	0	0.0788177339901478	0.170731707317073	0.40418118466899	0.15	0	0	9.10482188894924	28.6280630848635
10	10	CorrelationDetector	3	314	439	110	110	0	0.102941176470588	0.250569476082005	0.464692482915718	0.159090909090909	0.0540540540540541	0.0194805194805195	9.83631482959684	28.2545547889009
10	10	CorrelationDetector	2	382	465	86	86	0	0.0463576158940397	0.18494623655914	0.464516129032258	0.138888888888889	0.0909090909090909	0.0251256281407035	10.6324449878589	30.6655476694345
10	10	CorrelationDetector	3	393	503	127	127	0	0.0971428571428571	0.252485089463221	0.435387673956262	0.0961538461538462	0	0.0482456140350877	11.6088622567723	31.1848401005218
10	10	CorrelationDetector	2	244	313	71	71	0	0.0810810810810811	0.226837060702875	0.55591054313099	0.111111111111111	0.122448979591837	0.0126582278481013	8.8687849703262	25.7736393272657
10	10	CorrelationDetector	1	217	271	53	53	0	0.0875912408759124	0.195571955719557	0.575645756457565	0.135593220338983	0	0.0142857142857143	9.75548636165503	27.2216155579119
10	10	CorrelationDetector	4	381	547	136	136	0	0.102803738317757	0.248628884826325	0.489945155393053	0.348837209302326	0.151515151515152	0.0543933054393305	10.9648593018809	29.9277264597809
10	10	CorrelationDetector	2	279	403	119	119	0	0.130890052356021	0.295285359801489	0.607940446650124	0.302325581395349	0.0789473684210526	0.0707964601769911	11.724956609375	31.5038581961537
10	10	CorrelationDetector	4	267	311	73	73	0	0.0796019900497512	0.234726688102894	0.382636655948553	0.283018867924528	0.03125	0	10.1884500847253	29.1968066093067
10	10	CorrelationDetector	1	231	161	8	8	0	0.00757575757575758	0.0496894409937888	0.422360248447205	0.0212765957446809	0	0	8.97405094663995	27.7220800377342
10	10	CorrelationDetector	3	390	560	74	74	0	0.043731778425656	0.132142857142857	0.335714285714286	0.183673469387755	0.108108108108108	0	8.44936081430503	24.7399028932988
10	10	CorrelationDetector	8	424	842	221	221	0	0.0806045340050378	0.262470308788599	0.546318289786223	0.229166666666667	0.2	0.038961038961039	11.6536967336343	30.6445423697118
10	10	CorrelationDetector	2	234	274	47	47	0	0.0535714285714286	0.171532846715328	0.463503649635036	0.169811320754717	0	0	9.74398727880756	27.8790488017612
10	10	CorrelationDetector	5	386	349	44	44	0	0.0460992907801418	0.126074498567335	0.32378223495702	0.133333333333333	0.03125	0.0193236714975845	9.3449024814396	27.625071457523
10	10	CorrelationDetector	3	288	266	41	41	0	0.0659340659340659	0.154135338345865	0.349624060150376	0.230769230769231	0.0740740740740741	0	7.75984129225413	23.7480233099712
10	10	CorrelationDetector	3	359	485	92	92	0	0.0876623376623377	0.189690721649485	0.509278350515464	0.225806451612903	0.107692307692308	0.0576923076923077	10.9018434837934	28.6130302436933
10	10	CorrelationDetector	1	283	329	81	81	0	0.0926829268292683	0.246200607902736	0.483282674772036	0.263157894736842	0.0714285714285714	0.0315789473684211	10.356561147669	28.8129392384773
10	10	CorrelationDetector	2	273	357	98	98	0	0.127272727272727	0.274509803921569	0.529411764705882	0.386363636363636	0.111111111111111	0.0317460317460317	11.9918693445564	32.3624262848416
10	10	CorrelationDetector	0	212	188	42	42	0	0.13013698630137	0.223404255319149	0.51063829787234	0.163636363636364	0.037037037037037	0.191489361702128	10.3123792820305	30.273107438641
10	10	CorrelationDetector	3	317	515	173	173	0	0.111821086261981	0.335922330097087	0.576699029126214	0.357142857142857	0.037037037037037	0.0260416666666667	12.4206615420064	32.8160782478132
10	10	CorrelationDetector	2	331	426	119	119	0	0.12639405204461	0.279342723004695	0.532863849765258	0.323529411764706	0.129032258064516	0.103030303030303	10.5670263799062	29.5255840220408
10	10	CorrelationDetector	3	311	289	49	49	0	0.0689655172413793	0.169550173010381	0.366782006920415	0.163265306122449	0	0.0416666666666667	9.40834613997455	27.9655354599773
10	10	CorrelationDetector	2	358	367	72	72	0	0.126760563380282	0.196185286103542	0.566757493188011	0.224489795918367	0.0909090909090909	0.123529411764706	12.402070730926	32.8602275488811
10	10	CorrelationDetector	3	307	567	191	191	0	0.0866666666666667	0.336860670194004	0.560846560846561	0.220338983050847	0	0.0457516339869281	13.2962521981045	34.0285029325469
10	10	CorrelationDetector	1	268	381	125	125	0	0.165178571428571	0.328083989501312	0.574803149606299	0.272727272727273	0.254545454545455	0.0603448275862069	10.3853937753051	28.8694716781646
10	10	CorrelationDetector	2	297	343	69	69	0	0.0996168582375479	0.201166180758017	0.481049562682216	0.0526315789473684	0.0769230769230769	0.0693069306930693	9.99960857360163	29.4226551636482
10	10	CorrelationDetector	3	298	445	150	150	0	0.15609756097561	0.337078651685393	0.617977528089888	0.303030303030303	0.27027027027027	0.0571428571428571	8.78736343821141	25.6120168044444
10	10	CorrelationDetector	1	215	177	41	41	0	0.130434782608696	0.231638418079096	0.542372881355932	0.230769230769231	0	0	9.200303530057	26.848243823413
10	10	CorrelationDetector	0	280	231	83	83	0	0.140845070422535	0.359307359307359	0.649350649350649	0.30952380952381	0.176470588235294	0.0238095238095238	10.8360501974009	32.1164695700936
10	10	CorrelationDetector	1	310	320	105	105	0	0.123853211009174	0.328125	0.625	0.348837209302326	0	0.0454545454545455	11.3052602480731	32.0503147428288
10	10	CorrelationDetector	2	348	576	173	173	0	0.128526645768025	0.300347222222222	0.517361111111111	0.234042553191489	0.101694915254237	0.0306748466257669	11.2993491537748	31.765763059945
10	10	CorrelationDetector	2	233	370	123	123	0	0.158940397350993	0.332432432432432	0.643243243243243	0.277777777777778	0	0.0666666666666667	10.1474135398495	28.6361927340215
10	10	CorrelationDetector	2	245	335	113	113	0	0.202127659574468	0.337313432835821	0.662686567164179	0.339285714285714	0.08	0.03125	11.9184632644715	32.2356477036378
10	10	CorrelationDetector	3	373	489	131	131	0	0.127906976744186	0.267893660531697	0.390593047034765	0.525423728813559	0.1875	0.0257510729613734	9.99591243930033	28.2505548842274
10	10	CorrelationDetector	2	425	542	111	111	0	0.0949868073878628	0.20479704797048	0.468634686346863	0.245283018867925	0	0.0575539568345324	11.9226642578877	32.550699593814
10	10	CorrelationDetector	2	181	223	84	84	0	0.264957264957265	0.376681614349776	0.641255605381166	0.379310344827586	0.107142857142857	0.0588235294117647	10.6142343712866	29.2083792399663
10	10	CorrelationDetector	4	357	474	100	100	0	0.08	0.210970464135021	0.417721518987342	0.219512195121951	0.106382978723404	0.0469483568075117	10.5457956433468	29.3005297039646
10	10	CorrelationDetector	3	306	493	130	130	0	0.0987124463519313	0.26369168356998	0.60446247464503	0.0869565217391304	0.166666666666667	0.0551181102362205	11.5048014367442	33.7915527628205
10	10	CorrelationDetector	2	323	491	150	150	0	0.109489051094891	0.305498981670061	0.525458248472505	0.276595744680851	0.0434782608695652	0.0652173913043478	14.2216314871324	36.193004317789
10	10	CorrelationDetector	4	242	306	133	133	0	0.158620689655172	0.434640522875817	0.689542483660131	0.306122448979592	0.0454545454545455	0.0266666666666667	11.9120346981793	32.0829128849797
10	10	CorrelationDetector	4	492	546	79	79	0	0.0356294536817102	0.144688644688645	0.265567765567766	0.138888888888889	0.125	0.00576368876080692	9.45698014789008	27.190303196581
10	10	CorrelationDetector	3	286	373	99	99	0	0.113744075829384	0.265415549597855	0.487935656836461	0.333333333333333	0.0357142857142857	0.0454545454545455	9.19696009513164	26.593093557128
10	10	CorrelationDetector	0	190	313	177	177	0	0.424528301886792	0.565495207667732	0.814696485623003	0.538461538461538	0.317073170731707	0.181818181818182	12.9590819606621	33.5232774031558
10	10	CorrelationDetector	3	318	437	136	136	0	0.134199134199134	0.311212814645309	0.622425629290618	0.210526315789474	0.15	0.0845070422535211	12.5066874854924	33.2561689934797
10	10	CorrelationDetector	2	234	271	89	89	0	0.175324675324675	0.328413284132841	0.649446494464945	0.339622641509434	0.148148148148148	0.038961038961039	11.9676265034875	32.2877771834216
20	10	CorrelationDetector	0	197	156	80	80	0	0.348837209302326	0.512820512820513	0.788461538461538	0.480769230769231	0.333333333333333	0.0833333333333333	15.2796837039039	32.3687865791551
20	10	CorrelationDetector	1	175	306	177	177	0	0.330708661417323	0.57843137254902	0.820261437908497	0.420289855072464	0.157894736842105	0.189189189189189	19.0056000493321	38.7251121020265
20	10	CorrelationDetector	2	261	207	63	63	0	0.186335403726708	0.304347826086957	0.695652173913043	0.4	0.0454545454545455	0.0289855072463768	16.162272807295	34.4198124154702
20	10	CorrelationDetector	0	172	152	100	100	0	0.345238095238095	0.657894736842105	0.815789473684211	0.34	0.266666666666667	0.25	16.6171297094782	36.3872657675729
20	10	CorrelationDetector	2	258	334	153	153	0	0.176795580110497	0.458083832335329	0.70059880239521	0.461538461538462	0	0.0520833333333333	17.7377362231593	36.0253900082164
20	10	CorrelationDetector	1	249	248	104	104	0	0.197368421052632	0.419354838709677	0.701612903225806	0.24	0.142857142857143	0.0707070707070707	15.4140617958342	33.5668134684396
20	10	CorrelationDetector	1	263	522	236	236	0	0.190243902439024	0.452107279693487	0.710727969348659	0.36	0.0833333333333333	0.112903225806452	17.1352089669977	35.5280596814419
20	10	CorrelationDetector	0	248	270	144	144	0	0.180124223602484	0.533333333333333	0.744444444444444	0.324324324324324	0.3	0.217391304347826	16.3297376861497	33.4986579976954
20	10	CorrelationDetector	0	295	445	192	192	0	0.178438661710037	0.431460674157303	0.635955056179775	0.441860465116279	0.25	0.0344827586206897	18.0524751375031	36.9658327657958
20	10	CorrelationDetector	5	383	576	177	177	0	0.148351648351648	0.307291666666667	0.625	0.25531914893617	0.215686274509804	0.0474137931034483	19.3252289666827	37.5867123812712
20	10	CorrelationDetector	1	235	469	202	202	0	0.215909090909091	0.430703624733475	0.797441364605544	0.392156862745098	0.195121951219512	0.0909090909090909	17.0681982104666	34.9529670943292
20	10	CorrelationDetector	2	251	545	249	249	0	0.210743801652893	0.456880733944954	0.700917431192661	0.571428571428571	0.2	0.0078125	19.9346762378485	37.5738159353141
20	10	CorrelationDetector	1	185	247	146	146	0	0.25	0.591093117408907	0.805668016194332	0.305084745762712	0.0526315789473684	0.142857142857143	17.6331670671529	35.4020243174343
20	10	CorrelationDetector	2	355	445	143	143	0	0.135220125786164	0.321348314606742	0.658426966292135	0.536585365853659	0.117647058823529	0.0451977401129944	18.8660774428168	37.904063304856
20	10	CorrelationDetector	2	338	373	89	89	0	0.125954198473282	0.238605898123324	0.557640750670241	0.242424242424242	0.117647058823529	0.0638297872340425	18.4638384578907	36.7745140466994
20	10	CorrelationDetector	1	158	232	124	124	0	0.354166666666667	0.53448275862069	0.831896551724138	0.46969696969697	0	0	17.9346628265217	35.7689074320329
20	10	CorrelationDetector	2	356	385	101	101	0	0.101123595505618	0.262337662337662	0.542857142857143	0.25	0.2	0	16.8483958734576	34.063042188662
20	10	CorrelationDetector	0	283	395	117	117	0	0.110204081632653	0.29620253164557	0.716455696202532	0.26530612244898	0.0571428571428571	0.0408163265306122	18.8361804065615	37.0185261542628
20	10	CorrelationDetector	2	273	434	183	183	0	0.141630901287554	0.421658986175115	0.612903225806452	0.442857142857143	0.0526315789473684	0	18.826384600688	36.1233710654964
20	10	CorrelationDetector	1	209	197	110	110	0	0.315315315315315	0.558375634517767	0.761421319796954	0.482758620689655	0	0.166666666666667	15.9387699664841	32.4326457044355
20	10	CorrelationDetector	2	228	369	174	174	0	0.239583333333333	0.471544715447154	0.707317073170732	0.528301886792453	0.142857142857143	0.0987654320987654	18.4549685304947	35.9731346421648
20	10	CorrelationDetector	2	202	228	126	126	0	0.315384615384615	0.552631578947368	0.732456140350877	0.537037037037037	0.176470588235294	0.111111111111111	15.566651047234	33.0603460329706
20	10	CorrelationDetector	0	243	223	108	108	0	0.176923076923077	0.484304932735426	0.757847533632287	0.377777777777778	0.0666666666666667	0	16.8165522810872	35.6639717235752
20	10	CorrelationDetector	1	272	480	217	217	0	0.187234042553191	0.452083333333333	0.758333333333333	0.346153846153846	0.0681818181818182	0.0782608695652174	20.6493616424927	39.8561662976662
20	10	CorrelationDetector	2	245	298	115	115	0	0.196808510638298	0.385906040268456	0.677852348993289	0.479166666666667	0.210526315789474	0.06	18.4080135901776	37.1126578563104
20	10	CorrelationDetector	3	406	577	205	205	0	0.159891598915989	0.35528596187175	0.601386481802426	0.302325581395349	0.104166666666667	0.09765625	19.3384038685908	37.0599024570771
20	10	CorrelationDetector	3	300	434	183	183	0	0.180257510729614	0.421658986175115	0.679723502304147	0.444444444444444	0.0909090909090909	0.0928571428571429	18.6324586875106	37.3666872778754
20	10	CorrelationDetector	3	179	310	176	176	0	0.301204819277108	0.567741935483871	0.761290322580645	0.430769230769231	0.285714285714286	0.0701754385964912	17.8002321370557	36.6022031914024
20	10	CorrelationDetector	2	353	552	175	175	0	0.136498516320475	0.317028985507246	0.61231884057971	0.558139534883721	0.0888888888888889	0.0339805825242718	18.2221525301198	35.9702872323851
20	10	CorrelationDetector	0	189	271	169	169	0	0.377049180327869	0.623616236162362	0.797047970479705	0.574074074074074	0.210526315789474	0.230769230769231	17.809652491647	35.7398070693933
20	10	CorrelationDetector	0	207	271	177	177	0	0.445454545454545	0.653136531365314	0.892988929889299	0.518518518518518	0.3125	0.333333333333333	17.271635672195	35.3264350151744
20	10	CorrelationDetector	3	266	517	258	258	0	0.248062015503876	0.499032882011605	0.715667311411992	0.602941176470588	0.214285714285714	0.0303030303030303	18.890088586371	36.3139983313835
20	10	CorrelationDetector	4	299	409	189	189	0	0.199074074074074	0.462102689486553	0.743276283618582	0.4	0.214285714285714	0.101851851851852	20.2431351304679	39.6485319018015
20	10	CorrelationDetector	2	273	284	72	72	0	0.143617021276596	0.253521126760563	0.633802816901408	0.302325581395349	0.0769230769230769	0.105769230769231	16.8763000902257	35.3784315843562
20	10	CorrelationDetector	1	231	297	159	159	0	0.299319727891156	0.535353535353535	0.838383838383838	0.511111111111111	0.037037037037037	0.214285714285714	15.8073072310329	32.4761007905675
20	10	CorrelationDetector	2	311	341	101	101	0	0.130252100840336	0.296187683284457	0.624633431085044	0.325	0.0869565217391304	0.0517241379310345	15.576775906193	33.1146365514601
20	10	CorrelationDetector	0	201	250	85	85	0	0.222222222222222	0.34	0.744	0.25531914893617	0.217391304347826	0.0833333333333333	15.4705050998317	32.0110737796836
20	10	CorrelationDetector	0	180	324	202	202	0	0.32089552238806	0.623456790123457	0.827160493827161	0.589285714285714	0.161290322580645	0.0294117647058824	18.9478673165088	38.0907312374664
20	10	CorrelationDetector	0	163	207	146	146	0	0.418918918918919	0.705314009661836	0.888888888888889	0.446428571428571	0.25	0	16.1142334668824	33.4836957341261
20	10	CorrelationDetector	1	237	186	90	90	0	0.299212598425197	0.483870967741935	0.806451612903226	0.324324324324324	0.260869565217391	0.0681818181818182	15.9940939249082	34.3811656690747
2	10	CorrelationDetector	2	384	440	41	41	0	0.032258064516129	0.0931818181818182	0.215909090909091	0.04	0.0625	0.023121387283237	2.57232831645922	3.35807905949718
2	10	CorrelationDetector	1	277	300	20	20	0	0.0306748466257669	0.0666666666666667	0.28	0	0.0416666666666667	0.038961038961039	1.95426002341775	2.14109109123758
20	10	CorrelationDetector	0	198	222	119	119	0	0.325396825396825	0.536036036036036	0.797297297297297	0.538461538461538	0.272727272727273	0	14.8133735742591	32.2557091240677
20	10	CorrelationDetector	2	271	372	96	96	0	0.0886075949367089	0.258064516129032	0.586021505376344	0.2	0.105263157894737	0.00826446280991736	15.0724072120674	33.5730459204688
20	10	CorrelationDetector	1	232	159	61	61	0	0.180952380952381	0.383647798742138	0.591194968553459	0.380952380952381	0	0.025	13.5150624360949	31.1234728967724
20	10	CorrelationDetector	2	304	290	56	56	0	0.0704845814977974	0.193103448275862	0.468965517241379	0.127659574468085	0.0526315789473684	0.027027027027027	14.7370642158046	34.312368357792
20	10	CorrelationDetector	2	311	351	136	136	0	0.142857142857143	0.387464387464387	0.672364672364672	0.432432432432432	0.1	0.0306122448979592	13.8819053080495	32.1305748752727
20	10	CorrelationDetector	0	270	418	150	150	0	0.175115207373272	0.358851674641148	0.744019138755981	0.227272727272727	0.162790697674419	0.0357142857142857	16.6607295121104	35.5951510045169
20	10	CorrelationDetector	1	254	268	108	108	0	0.155405405405405	0.402985074626866	0.742537313432836	0.163636363636364	0.0909090909090909	0.103448275862069	14.6144441576135	35.0683110130144
20	10	CorrelationDetector	1	251	217	83	83	0	0.162790697674419	0.382488479262673	0.691244239631336	0.380952380952381	0.0526315789473684	0	15.8346402503754	34.442281737818
20	10	CorrelationDetector	2	325	296	83	83	0	0.112745098039216	0.280405405405405	0.550675675675676	0.0909090909090909	0.0454545454545455	0.0774647887323944	15.7803269200395	33.3704700065771
20	10	CorrelationDetector	2	258	195	58	58	0	0.115107913669065	0.297435897435897	0.533333333333333	0.295454545454545	0.0555555555555556	0	15.8637310422497	33.7893345169275
20	10	CorrelationDetector	1	212	152	48	48	0	0.157894736842105	0.315789473684211	0.684210526315789	0.260869565217391	0	0	15.0352876006701	33.9387377299203
20	10	CorrelationDetector	1	224	328	169	169	0	0.206451612903226	0.515243902439024	0.814024390243902	0.418181818181818	0	0.0952380952380952	16.7818756449029	35.793565693422
20	10	CorrelationDetector	2	262	287	64	64	0	0.106382978723404	0.222996515679443	0.564459930313589	0.234042553191489	0.0882352941176471	0.05	16.2983818293999	35.1272337422407
20	10	CorrelationDetector	2	222	360	128	128	0	0.194117647058824	0.355555555555556	0.647222222222222	0.277777777777778	0.275	0.028169014084507	17.1384297524381	36.2180423275467
20	10	CorrelationDetector	1	295	326	96	96	0	0.118918918918919	0.294478527607362	0.631901840490798	0.175	0.0476190476190476	0.0108695652173913	15.4631292772175	34.2240358502079
20	10	CorrelationDetector	1	256	190	49	49	0	0.153225806451613	0.257894736842105	0.621052631578947	0.219512195121951	0	0.02	13.4972144532589	31.890825031081
20	10	CorrelationDetector	3	335	618	261	261	0	0.145631067961165	0.422330097087379	0.72168284789644	0.362068965517241	0.03125	0.0510204081632653	18.8050655253009	38.2320284846354
20	10	CorrelationDetector	4	430	603	212	212	0	0.179802955665025	0.351575456053068	0.592039800995025	0.564102564102564	0.121951219512195	0.0857142857142857	18.6130862635945	38.4567336591617
20	10	CorrelationDetector	2	289	440	129	129	0	0.131687242798354	0.293181818181818	0.606818181818182	0.35	0.115384615384615	0.0520833333333333	17.287358866149	35.4190291927444
20	10	CorrelationDetector	2	272	418	182	182	0	0.170103092783505	0.435406698564593	0.696172248803828	0.225	0.151515151515152	0.0175438596491228	16.0005906255301	33.8493643242639
2	10	NoMasking	5	279	490	0	0	0	0	0	0.0612244897959184	0	0	0	0.988586165976505	0.843045585663017
2	10	NoMasking	6	345	468	0	0	0	0	0	0.047008547008547	0	0	0	1.27160796152022	2.38561869954427
2	10	NoMasking	3	248	365	0	0	0	0	0	0.249315068493151	0	0	0	2.24843443071153	7.8510049081468
2	10	NoMasking	3	363	603	0	0	0	0	0	0.218905472636816	0	0	0	2.48729761813798	8.32279835107029
2	10	NoMasking	2	353	660	0	0	0	0	0	0.124242424242424	0	0	0	2.05780481336028	3.71288531294213
2	10	NoMasking	5	386	723	0	0	0	0	0	0.15076071922545	0	0	0	2.47355160588937	5.90141674252916
2	10	NoMasking	5	479	653	0	0	0	0	0	0.0765696784073507	0	0	0	1.79893777681971	2.51028761948186
2	10	NoMasking	1	359	467	0	0	0	0	0	0.107066381156317	0	0	0	1.56859721380603	2.61580305898225
2	10	NoMasking	4	373	381	0	0	0	0	0	0.05249343832021	0	0	0	1.05672410553138	0.537093122579714
2	10	NoMasking	2	369	270	0	0	0	0	0	0.0518518518518519	0	0	0	0.974898185924785	0.957190673741766
2	10	NoMasking	2	295	252	0	0	0	0	0	0.0873015873015873	0	0	0	1.54254295391223	2.33498665041459
2	10	NoMasking	4	268	465	0	0	0	0	0	0.0387096774193548	0	0	0	1.14409706235243	0.388710491778949
2	10	NoMasking	2	209	148	0	0	0	0	0	0.0540540540540541	0	0	0	0.886648152034296	0.239815035869347
2	10	NoMasking	3	476	731	0	0	0	0	0	0.0560875512995896	0	0	0	0.946444544325432	0.659955941658835
2	10	NoMasking	5	249	301	0	0	0	0	0	0.0863787375415282	0	0	0	1.33678932117427	1.23620851510446
2	10	NoMasking	2	314	289	0	0	0	0	0	0.0830449826989619	0	0	0	1.7782139802055	3.15123213480439
2	10	NoMasking	5	471	650	0	0	0	0	0	0.107692307692308	0	0	0	1.96306312973259	4.52668339483263
2	10	NoMasking	5	399	492	0	0	0	0	0	0.123983739837398	0	0	0	1.91103922000303	4.20451507772889
2	10	CorrelationDetector	1	339	381	2	2	0	0	0.005249343832021	0.078740157480315	0	0	0	1.4748642703626	2.67674889296786
2	10	CorrelationDetector	4	429	515	22	22	0	0.0277777777777778	0.0427184466019417	0.104854368932039	0.113636363636364	0	0.0191693290734824	1.68561519836669	3.44310761048424
2	10	NoMasking	6	587	807	0	0	0	0	0	0.0743494423791822	0	0	0	1.46389530780929	1.87253012597818
2	10	NoMasking	2	303	309	0	0	0	0	0	0.13915857605178	0	0	0	1.58534356333183	3.47288523563439
2	10	NoMasking	4	384	538	0	0	0	0	0	0.0631970260223048	0	0	0	1.13473978982887	0.557140288889078
2	10	NoMasking	3	283	237	0	0	0	0	0	0.0675105485232067	0	0	0	0.973748867908403	0.625229292482622
2	10	NoMasking	7	366	597	0	0	0	0	0	0.152428810720268	0	0	0	2.01105648141379	2.73429610280606
2	10	NoMasking	3	365	437	0	0	0	0	0	0.208237986270023	0	0	0	2.40335777319152	8.72618003769674
2	10	NoMasking	3	311	378	0	0	0	0	0	0.0343915343915344	0	0	0	0.629303965423248	0.202523657132178
2	10	NoMasking	4	407	453	0	0	0	0	0	0.0309050772626932	0	0	0	0.938902774627247	0.869921950202151
2	10	NoMasking	4	508	926	0	0	0	0	0	0.172786177105832	0	0	0	2.2785825897118	6.81772390784001
2	10	NoMasking	5	583	672	0	0	0	0	0	0.120535714285714	0	0	0	2.04654263983855	5.64594321060567
2	10	NoMasking	7	451	663	0	0	0	0	0	0.0678733031674208	0	0	0	1.36240669017442	2.06254415723577
2	10	NoMasking	0	250	336	0	0	0	0	0	0.0714285714285714	0	0	0	0.983698257898394	1.34069472698807
2	10	NoMasking	3	458	746	0	0	0	0	0	0.264075067024129	0	0	0	3.43092426346524	13.5208270953978
2	10	NoMasking	4	495	705	0	0	0	0	0	0.26241134751773	0	0	0	3.42658721066934	12.0234050506027
2	10	NoMasking	3	241	253	0	0	0	0	0	0.08300395256917	0	0	0	1.8813558271901	4.52141431397952
2	10	NoMasking	4	326	501	0	0	0	0	0	0.093812375249501	0	0	0	1.82861752209377	3.08522163847031
2	10	NoMasking	2	252	363	0	0	0	0	0	0.112947658402204	0	0	0	1.55503905665772	1.33039755977157
2	10	NoMasking	1	289	339	0	0	0	0	0	0.056047197640118	0	0	0	1.45402881097609	1.57202422392877
2	10	NoMasking	3	409	445	0	0	0	0	0	0.0719101123595506	0	0	0	1.46168425018208	2.9695290013055
2	10	NoMasking	4	216	250	0	0	0	0	0	0.12	0	0	0	1.38961733588771	2.63119292979033
2	10	Max_Diff_CorrelationDetector	4	472	691	52	52	0	0.032258064516129	0.0752532561505065	0.15629522431259	0.0512820512820513	0.0408163265306122	0.0238095238095238	2.58607035629573	7.84966722330752
2	10	Max_Diff_CorrelationDetector	3	344	485	23	23	0	0.0135593220338983	0.0474226804123711	0.216494845360825	0.0212765957446809	0.0285714285714286	0.0102564102564103	2.70971396205088	8.83453341251424
2	10	Max_Diff_CorrelationDetector	2	334	323	3	3	0	0	0.00928792569659443	0.0247678018575851	0	0	0	0.7386981239697	0.288227465884179
2	10	Max_Diff_CorrelationDetector	1	290	306	0	0	0	0	0	0.0294117647058824	0	0	0	0.798626230681927	0.518022934910173
2	10	Max_Diff_CorrelationDetector	5	487	657	16	16	0	0.00435729847494553	0.0243531202435312	0.091324200913242	0	0.0238095238095238	0	1.95312133282087	3.48203725165455
2	10	Max_Diff_CorrelationDetector	2	337	393	37	37	0	0.0292887029288703	0.094147582697201	0.180661577608142	0.0285714285714286	0	0.0134228187919463	2.53381032475807	10.5948984600485
2	10	Max_Diff_CorrelationDetector	4	545	648	19	19	0	0.00835073068893528	0.029320987654321	0.0787037037037037	0	0.0294117647058824	0.00753768844221105	1.52765891565746	1.53502942027067
2	10	Max_Diff_CorrelationDetector	3	324	392	25	25	0	0.00809716599190283	0.0637755102040816	0.188775510204082	0.0256410256410256	0.027027027027027	0	1.67665539570313	3.52535582099138
2	10	Max_Diff_CorrelationDetector	4	325	299	7	7	0	0.00434782608695652	0.0234113712374582	0.0668896321070234	0	0	0.00617283950617284	1.3617144034622	1.18192993466844
2	10	Max_Diff_CorrelationDetector	2	440	472	7	7	0	0.00738916256157635	0.0148305084745763	0.0466101694915254	0.0238095238095238	0	0.00662251655629139	1.47230538574479	1.05418556678226
2	10	Max_Diff_CorrelationDetector	3	409	837	24	24	0	0.0142450142450142	0.028673835125448	0.111111111111111	0.0645161290322581	0.0175438596491228	0.00754716981132075	1.37422444510024	2.84233208794559
2	10	Max_Diff_CorrelationDetector	4	541	766	6	6	0	0	0.00783289817232376	0.0509138381201044	0	0	0	1.1782351178676	1.16456684713297
2	10	Max_Diff_CorrelationDetector	5	318	489	20	20	0	0.0103806228373702	0.0408997955010225	0.122699386503067	0.04	0	0	1.13908236313766	1.26940047784758
2	10	Max_Diff_CorrelationDetector	2	530	542	12	12	0	0.00436681222707424	0.022140221402214	0.0811808118081181	0.0333333333333333	0	0	1.46160206526359	2.67850580940074
2	10	Max_Diff_CorrelationDetector	6	523	636	14	14	0	0.018	0.0220125786163522	0.111635220125786	0.027027027027027	0.0217391304347826	0.0169902912621359	1.57485748168822	1.91791233258723
2	10	Max_Diff_CorrelationDetector	3	444	524	17	17	0	0.00719424460431655	0.0324427480916031	0.116412213740458	0.0588235294117647	0	0.00309597523219814	2.20109277660275	5.17328220130143
2	10	Max_Diff_CorrelationDetector	6	588	906	22	22	0	0.00527240773286467	0.0242825607064018	0.0949227373068433	0	0.0273972602739726	0.00233100233100233	1.30286469251854	0.553334210476883
2	10	Max_Diff_CorrelationDetector	1	272	311	10	10	0	0.0186046511627907	0.0321543408360129	0.170418006430868	0.075	0	0	1.31966286621867	1.15670955632677
2	10	Max_Diff_CorrelationDetector	4	414	762	43	43	0	0.0128205128205128	0.0564304461942257	0.146981627296588	0.125	0.0136986301369863	0	2.52043104013092	9.39188939327945
2	10	Max_Diff_CorrelationDetector	3	280	435	42	42	0	0.024	0.096551724137931	0.222988505747126	0.109090909090909	0	0	2.56900722979059	8.56449211347476
2	10	Max_Diff_CorrelationDetector	7	368	585	1	1	0	0	0.00170940170940171	0.0307692307692308	0	0	0	0.83287528601664	0.417067775844924
2	10	Max_Diff_CorrelationDetector	3	398	518	12	12	0	0.00294985250737463	0.0231660231660232	0.0945945945945946	0	0	0.00436681222707424	1.64082085656922	2.90327796872441
2	10	Max_Diff_CorrelationDetector	3	445	530	17	17	0	0.0231362467866324	0.0320754716981132	0.124528301886792	0	0	0.0284810126582278	2.07301562193498	4.47821012879071
2	10	Max_Diff_CorrelationDetector	2	324	402	24	24	0	0.011070110701107	0.0597014925373134	0.17910447761194	0.0625	0	0	2.57835818757098	8.42094524239034
2	10	Max_Diff_CorrelationDetector	2	300	367	4	4	0	0.00383141762452107	0.0108991825613079	0.0762942779291553	0	0.03125	0	0.86396308152592	0.614878986463393
2	10	Max_Diff_CorrelationDetector	3	488	493	5	5	0	0.00930232558139535	0.0101419878296146	0.0527383367139959	0	0	0.0113960113960114	1.52205831799347	2.27332365358792
2	10	Max_Diff_CorrelationDetector	6	386	532	10	10	0	0	0.018796992481203	0.0601503759398496	0	0	0	0.723006554499529	0.385496541030236
2	10	Max_Diff_CorrelationDetector	2	280	294	0	0	0	0	0	0.0340136054421769	0	0	0	0.850375613000705	0.464921254342608
2	10	Max_Diff_CorrelationDetector	4	475	796	16	16	0	0.00227272727272727	0.0201005025125628	0.0565326633165829	0	0	0	0.970829187569989	0.587940577728114
2	10	Max_Diff_CorrelationDetector	2	230	177	0	0	0	0	0	0.0677966101694915	0	0	0	0.942977253085968	0.614973192367366
2	10	Max_Diff_CorrelationDetector	5	452	588	22	22	0	0.00448430493273543	0.0374149659863946	0.11734693877551	0	0.0119047619047619	0.00308641975308642	1.43825444341278	2.04763098806076
2	10	Max_Diff_CorrelationDetector	4	456	475	14	14	0	0.0125628140703518	0.0294736842105263	0.111578947368421	0.0444444444444444	0	0.00892857142857143	1.73991523977951	3.77484189727793
2	10	Max_Diff_CorrelationDetector	3	360	458	11	11	0	0.00613496932515337	0.0240174672489083	0.102620087336245	0.0196078431372549	0	0	1.13158259933272	1.37079500390792
2	10	Max_Diff_CorrelationDetector	5	440	603	7	7	0	0	0.0116086235489221	0.132669983416252	0	0	0	1.78807161378062	4.78353598342595
2	10	Max_Diff_CorrelationDetector	5	427	636	9	9	0	0	0.0141509433962264	0.110062893081761	0	0	0	1.64920955392017	4.03710416013421
2	10	Max_Diff_CorrelationDetector	4	564	687	8	8	0	0.00808080808080808	0.0116448326055313	0.0887918486171761	0.0285714285714286	0	0.00681818181818182	2.21490619979765	7.70025749859685
2	10	Max_Diff_CorrelationDetector	1	272	310	4	4	0	0.0043859649122807	0.0129032258064516	0.032258064516129	0.0204081632653061	0	0	0.558606694768848	0.134684356551864
2	10	Max_Diff_CorrelationDetector	4	359	474	7	7	0	0	0.0147679324894515	0.069620253164557	0	0	0	1.00102175820635	0.664782897369561
2	10	Max_Diff_CorrelationDetector	4	443	561	5	5	0	0.00506329113924051	0.0089126559714795	0.0374331550802139	0	0	0.00647249190938511	1.416042101789	1.96112641028494
2	10	Max_Diff_CorrelationDetector	2	375	451	6	6	0	0.00602409638554217	0.0133037694013304	0.1019955654102	0	0	0	1.67917811327367	4.30774119639051
3	10	Max_Diff_CorrelationDetector	4	392	697	80	80	0	0.0359116022099447	0.114777618364419	0.328550932568149	0.18	0	0.0171673819742489	3.198011212164	12.0884089648634
3	10	Max_Diff_CorrelationDetector	4	332	483	82	82	0	0.0380622837370242	0.169772256728778	0.312629399585921	0.106382978723404	0.0222222222222222	0	3.91924753911556	14.4526942548226
3	10	Max_Diff_CorrelationDetector	2	505	620	42	42	0	0.0301724137931034	0.067741935483871	0.190322580645161	0.027027027027027	0	0.0338541666666667	3.68575552837821	13.6517737731422
3	10	Max_Diff_CorrelationDetector	4	440	441	35	35	0	0.0320855614973262	0.0793650793650794	0.18140589569161	0.0540540540540541	0.0294117647058824	0.0299003322259136	3.34820110197931	12.9834036206837
3	10	Max_Diff_CorrelationDetector	2	365	432	28	28	0	0.0178571428571429	0.0648148148148148	0.194444444444444	0	0.027027027027027	0.0195121951219512	3.37159175697825	12.1872930496115
3	10	Max_Diff_CorrelationDetector	3	449	808	52	52	0	0.0134529147982063	0.0643564356435644	0.226485148514851	0.0588235294117647	0.0263157894736842	0.00589970501474926	3.57046862804868	13.2752795979495
3	10	Max_Diff_CorrelationDetector	3	405	404	15	15	0	0.0169491525423729	0.0371287128712871	0.202970297029703	0.0540540540540541	0	0.00476190476190476	2.25912986611818	6.0315940011008
3	10	Max_Diff_CorrelationDetector	3	441	536	31	31	0	0.00288184438040346	0.0578358208955224	0.145522388059701	0.0303030303030303	0	0	1.83365516838873	6.08229292428058
3	10	Max_Diff_CorrelationDetector	2	333	487	61	61	0	0.0398550724637681	0.125256673511294	0.28952772073922	0.195652173913043	0	0	3.14183375175202	11.8589776992037
3	10	Max_Diff_CorrelationDetector	1	256	425	44	44	0	0.0365853658536585	0.103529411764706	0.312941176470588	0.1	0.0652173913043478	0	4.4666671864035	17.914808865217
3	10	Max_Diff_CorrelationDetector	5	535	631	44	44	0	0.0266666666666667	0.0697305863708399	0.26148969889065	0.0980392156862745	0	0.0213903743315508	5.31469146084622	23.302699230924
3	10	Max_Diff_CorrelationDetector	2	214	234	31	31	0	0.0555555555555556	0.132478632478632	0.405982905982906	0.0851063829787234	0.0571428571428571	0	4.33569623336962	19.2311524530822
3	10	Max_Diff_CorrelationDetector	5	404	787	140	140	0	0.06	0.177890724269377	0.336721728081321	0.25	0	0.0353356890459364	4.75005654035164	20.1942784919806
3	10	Max_Diff_CorrelationDetector	4	380	723	115	115	0	0.0771349862258953	0.159059474412171	0.318118948824343	0.0810810810810811	0.0294117647058824	0.0474137931034483	5.46117129488146	22.4767164903362
3	10	Max_Diff_CorrelationDetector	3	317	308	16	16	0	0.025	0.051948051948052	0.214285714285714	0.0961538461538462	0	0.00578034682080925	3.19477408079469	11.7960796136085
3	10	Max_Diff_CorrelationDetector	5	344	495	58	58	0	0.0510204081632653	0.117171717171717	0.347474747474747	0.0277777777777778	0.0517241379310345	0.055	3.82628555052092	15.0470772709225
3	10	Max_Diff_CorrelationDetector	4	404	467	45	45	0	0.0482573726541555	0.0963597430406852	0.184154175588865	0.288461538461538	0	0.0105263157894737	2.62994888408778	9.19926542443501
3	10	Max_Diff_CorrelationDetector	2	349	596	94	94	0	0.073482428115016	0.157718120805369	0.342281879194631	0.189189189189189	0.0677966101694915	0.0536585365853659	4.12300817674635	16.7752816142693
3	10	Max_Diff_CorrelationDetector	4	480	540	74	74	0	0.0327455919395466	0.137037037037037	0.248148148148148	0.25	0.0185185185185185	0.0114503816793893	4.15024434791624	15.6110381657114
3	10	Max_Diff_CorrelationDetector	1	289	441	89	89	0	0.167381974248927	0.201814058956916	0.403628117913832	0.298245614035088	0	0.0467289719626168	3.99535162985033	15.778482565801
3	10	Max_Diff_CorrelationDetector	4	372	557	15	15	0	0.00914634146341463	0.0269299820466786	0.0987432675044883	0.0263157894736842	0	0	2.29498028873226	8.64610323002404
3	10	Max_Diff_CorrelationDetector	3	598	835	54	54	0	0.010752688172043	0.0646706586826347	0.165269461077844	0.13953488372093	0	0	3.01078314845406	11.0544485264572
3	10	Max_Diff_CorrelationDetector	3	308	321	22	22	0	0.0378787878787879	0.0685358255451713	0.236760124610592	0.111111111111111	0	0.0120481927710843	3.04633887755917	11.4681277778472
3	10	Max_Diff_CorrelationDetector	2	398	412	33	33	0	0.028125	0.0800970873786408	0.235436893203884	0.119047619047619	0	0.00778210116731518	3.18007319059199	12.3071904625672
3	10	Max_Diff_CorrelationDetector	4	352	460	48	48	0	0.0738255033557047	0.104347826086957	0.21304347826087	0.0487804878048781	0.0192307692307692	0.010752688172043	3.280090738187	12.9505266577712
3	10	Max_Diff_CorrelationDetector	3	427	474	18	18	0	0.0056657223796034	0.0379746835443038	0.120253164556962	0.0208333333333333	0	0	2.37296577152527	7.13189643627683
3	10	Max_Diff_CorrelationDetector	3	342	361	19	19	0	0.0234113712374582	0.0526315789473684	0.166204986149584	0.1	0	0	2.6850105325875	9.51637406260238
3	10	Max_Diff_CorrelationDetector	2	374	440	14	14	0	0.0214067278287462	0.0318181818181818	0.175	0.0625	0	0.0156862745098039	2.60055731941284	9.43742941642907
3	10	Max_Diff_CorrelationDetector	4	511	558	21	21	0	0.0211864406779661	0.0376344086021505	0.0985663082437276	0.06	0.08	0.0121951219512195	2.7933794028316	9.51965370279288
3	10	Max_Diff_CorrelationDetector	1	305	423	22	22	0	0.0234113712374582	0.0520094562647754	0.167848699763593	0.113207547169811	0	0	2.71424428650244	11.5199116149698
3	10	Max_Diff_CorrelationDetector	7	473	819	65	65	0	0.0171673819742489	0.0793650793650794	0.15995115995116	0.0625	0.0526315789473684	0.00543478260869565	2.81001572877968	10.1679852116116
3	10	Max_Diff_CorrelationDetector	1	203	136	11	11	0	0.0434782608695652	0.0808823529411765	0.338235294117647	0.0476190476190476	0	0	2.41843737684331	8.66016371761284
3	10	Max_Diff_CorrelationDetector	4	370	327	2	2	0	0.00352112676056338	0.00611620795107034	0.0856269113149847	0	0	0	2.27560081906118	7.67664956819797
3	10	Max_Diff_CorrelationDetector	3	309	369	60	60	0	0.0555555555555556	0.16260162601626	0.24390243902439	0.275	0.024390243902439	0	2.75175580581102	9.43116284857713
3	10	Max_Diff_CorrelationDetector	1	210	205	55	55	0	0.0901639344262295	0.268292682926829	0.346341463414634	0.192307692307692	0	0	3.08207379736988	12.7248979237688
3	10	Max_Diff_CorrelationDetector	3	310	403	7	7	0	0	0.0173697270471464	0.124069478908189	0	0	0	3.54392426108914	15.6500129701902
5	10	Max_Diff_CorrelationDetector	1	218	255	43	43	0	0.115702479338843	0.168627450980392	0.356862745098039	0.22	0	0	5.53322884435343	20.4828212456683
5	10	Max_Diff_CorrelationDetector	3	341	447	54	54	0	0.0555555555555556	0.120805369127517	0.328859060402685	0.113207547169811	0.0555555555555556	0.0414746543778802	6.41040771582163	23.3450322700663
5	10	Max_Diff_CorrelationDetector	2	210	250	33	33	0	0.0364963503649635	0.132	0.344	0.0338983050847458	0	0	4.972227191305	19.2659657510578
5	10	Max_Diff_CorrelationDetector	1	260	240	81	81	0	0.135802469135802	0.3375	0.529166666666667	0.234042553191489	0.0869565217391304	0.0454545454545455	6.76047356604904	25.4653952543198
5	10	Max_Diff_CorrelationDetector	3	350	403	43	43	0	0.0505836575875486	0.106699751861042	0.444168734491315	0.115384615384615	0.0384615384615385	0.0359281437125748	5.97211367833549	21.593865513433
5	10	Max_Diff_CorrelationDetector	3	351	743	179	179	0	0.116197183098592	0.240915208613728	0.430686406460296	0.384615384615385	0.0476190476190476	0.0467289719626168	5.49493433798491	22.5355337960023
5	10	Max_Diff_CorrelationDetector	2	289	443	100	100	0	0.0995670995670996	0.225733634311512	0.428893905191874	0.245283018867925	0.075	0.0486111111111111	6.86812633038932	26.4952994225345
5	10	Max_Diff_CorrelationDetector	2	232	239	63	63	0	0.0517241379310345	0.263598326359833	0.552301255230126	0.102564102564103	0	0	5.86865316735325	22.1955365746186
5	10	Max_Diff_CorrelationDetector	1	205	171	17	17	0	0.0630630630630631	0.0994152046783626	0.304093567251462	0.04	0.142857142857143	0.02	5.31495488543511	22.1021753850325
5	10	Max_Diff_CorrelationDetector	4	282	383	83	83	0	0.0932642487046632	0.216710182767624	0.383812010443864	0.113636363636364	0.0666666666666667	0.0655737704918033	6.91249147012631	27.3694146209574
5	10	Max_Diff_CorrelationDetector	1	380	603	158	158	0	0.0763888888888889	0.262023217247098	0.419568822553897	0.142857142857143	0	0.0424242424242424	6.66322409985415	25.677273576957
5	10	Max_Diff_CorrelationDetector	3	347	479	84	84	0	0.10801393728223	0.175365344467641	0.419624217118998	0.282051282051282	0.05	0.112676056338028	7.31852346540947	27.8387075202813
5	10	Max_Diff_CorrelationDetector	2	369	339	90	90	0	0.09375	0.265486725663717	0.463126843657817	0.272727272727273	0.0588235294117647	0.0338983050847458	7.48412352102771	27.1863109520269
5	10	Max_Diff_CorrelationDetector	1	291	277	65	65	0	0.121212121212121	0.234657039711191	0.51985559566787	0.145833333333333	0.0857142857142857	0.0238095238095238	7.71881358853363	28.046347321069
5	10	Max_Diff_CorrelationDetector	4	328	441	30	30	0	0.0308880308880309	0.0680272108843537	0.217687074829932	0.104166666666667	0	0.0162162162162162	4.46248890728626	16.7225138755625
5	10	Max_Diff_CorrelationDetector	1	275	300	53	53	0	0.107954545454545	0.176666666666667	0.36	0.106382978723404	0.166666666666667	0.0789473684210526	4.4351309470556	18.8926847418228
5	10	Max_Diff_CorrelationDetector	4	274	423	28	28	0	0.0443349753694581	0.066193853427896	0.257683215130024	0.0256410256410256	0.1	0.00925925925925926	3.94334757516262	15.2144247273949
5	10	Max_Diff_CorrelationDetector	1	281	357	46	46	0	0.0232558139534884	0.128851540616246	0.240896358543417	0.0909090909090909	0.0256410256410256	0	3.13207711899186	12.5712517162938
5	10	Max_Diff_CorrelationDetector	3	364	635	69	69	0	0.0603174603174603	0.108661417322835	0.307086614173228	0.193548387096774	0.0769230769230769	0.0306122448979592	5.82601903470422	23.840833119969
5	10	Max_Diff_CorrelationDetector	2	236	131	5	5	0	0.00980392156862745	0.0381679389312977	0.206106870229008	0.0333333333333333	0	0	3.01839216510966	11.7224720407681
5	10	Max_Diff_CorrelationDetector	2	258	550	152	152	0	0.0661157024793388	0.276363636363636	0.567272727272727	0.236363636363636	0.0185185185185185	0.019047619047619	7.93984985669952	27.5753413737258
5	10	Max_Diff_CorrelationDetector	4	458	478	33	33	0	0.0297029702970297	0.0690376569037657	0.135983263598326	0.230769230769231	0.027027027027027	0	5.35193349201337	20.0499662303595
5	10	Max_Diff_CorrelationDetector	3	401	467	36	36	0	0.0291545189504373	0.0770877944325482	0.211991434689507	0.0909090909090909	0.024390243902439	0.0192307692307692	4.76721554779594	17.0052327796277
5	10	Max_Diff_CorrelationDetector	4	426	798	124	124	0	0.0889423076923077	0.155388471177945	0.43734335839599	0.27027027027027	0.072463768115942	0.0222222222222222	7.90531858446159	28.4122282751987
5	10	Max_Diff_CorrelationDetector	2	296	301	14	14	0	0.00480769230769231	0.0465116279069767	0.172757475083056	0	0.0208333333333333	0	4.41479731422208	16.580629711664
5	10	Max_Diff_CorrelationDetector	4	358	483	67	67	0	0.056140350877193	0.13871635610766	0.368530020703934	0.212121212121212	0.0666666666666667	0.0155440414507772	6.35247912650418	23.2727594077087
5	10	Max_Diff_CorrelationDetector	1	257	331	99	99	0	0.114427860696517	0.299093655589124	0.570996978851964	0.3	0	0.0298507462686567	6.77667465401049	24.372855747136
5	10	Max_Diff_CorrelationDetector	2	311	483	69	69	0	0.0876623376623377	0.142857142857143	0.339544513457557	0.194029850746269	0.102564102564103	0.0510204081632653	6.80838821378003	24.5191385574328
5	10	Max_Diff_CorrelationDetector	4	333	366	85	85	0	0.0779220779220779	0.23224043715847	0.437158469945355	0.325	0	0.0118343195266272	6.78221313248571	23.8525324189414
5	10	Max_Diff_CorrelationDetector	2	429	824	118	118	0	0.0434782608695652	0.143203883495146	0.413834951456311	0.12	0.115384615384615	0.014760147601476	7.84481600328205	27.5300456934177
5	10	Max_Diff_CorrelationDetector	4	394	803	185	185	0	0.0820512820512821	0.230386052303861	0.437110834371108	0.387755102040816	0.0983606557377049	0.0147058823529412	7.82936441580214	26.3234144031374
5	10	Max_Diff_CorrelationDetector	4	303	343	68	68	0	0.0735294117647059	0.198250728862974	0.379008746355685	0.25	0.08	0	7.1874987471784	27.055613140312
5	10	Max_Diff_CorrelationDetector	3	254	384	86	86	0	0.0989010989010989	0.223958333333333	0.4375	0.0697674418604651	0.142857142857143	0	7.49382132896534	26.6615052213039
5	10	Max_Diff_CorrelationDetector	2	254	434	117	117	0	0.13963963963964	0.269585253456221	0.539170506912442	0.254545454545455	0.2	0.0458715596330275	8.26295586135387	26.5267425714403
5	10	Max_Diff_CorrelationDetector	5	409	464	26	26	0	0.0338983050847458	0.0560344827586207	0.211206896551724	0.209302325581395	0.05	0.00359712230215827	5.98862946454918	23.2797038375006
5	10	Max_Diff_CorrelationDetector	3	292	310	25	25	0	0.037344398340249	0.0806451612903226	0.235483870967742	0.113207547169811	0	0.0136986301369863	4.04426304492478	14.7638608799955
5	10	Max_Diff_CorrelationDetector	1	273	311	46	46	0	0.0597014925373134	0.147909967845659	0.446945337620579	0.116279069767442	0.0454545454545455	0.075	5.1736177431307	20.08807149689
5	10	Max_Diff_CorrelationDetector	2	373	460	63	63	0	0.047244094488189	0.13695652173913	0.297826086956522	0.2	0	0.0208333333333333	5.22494289818217	19.5078254750482
5	10	Max_Diff_CorrelationDetector	6	494	682	30	30	0	0.0152505446623094	0.0439882697947214	0.234604105571848	0.032258064516129	0.0508474576271186	0.00842696629213483	4.78415141413827	19.3001363675816
5	10	Max_Diff_CorrelationDetector	2	324	412	21	21	0	0.0196850393700787	0.0509708737864078	0.225728155339806	0.0930232558139535	0.0263157894736842	0	5.51339925972295	21.6657066571846
7	10	Max_Diff_CorrelationDetector	2	268	313	58	58	0	0.0966386554621849	0.185303514376997	0.380191693290735	0.210526315789474	0.037037037037037	0.03	8.63382412491469	27.942034971277
7	10	Max_Diff_CorrelationDetector	3	274	417	76	76	0	0.0590551181102362	0.182254196642686	0.39568345323741	0.210526315789474	0.0294117647058824	0.0078125	7.26186520754072	23.3859864761045
7	10	Max_Diff_CorrelationDetector	5	433	668	114	114	0	0.0491803278688525	0.170658682634731	0.365269461077844	0.203703703703704	0.137254901960784	0.00917431192660551	8.75292666460316	26.2979030202334
7	10	Max_Diff_CorrelationDetector	3	329	408	47	47	0	0.02734375	0.115196078431373	0.311274509803922	0.138888888888889	0.027027027027027	0.00649350649350649	5.99489727676892	20.07165834423
7	10	Max_Diff_CorrelationDetector	1	160	129	33	33	0	0.197802197802198	0.255813953488372	0.581395348837209	0.226415094339623	0.130434782608696	0.181818181818182	7.77734130641101	25.806539758024
7	10	Max_Diff_CorrelationDetector	2	370	465	61	61	0	0.0137931034482759	0.131182795698925	0.339784946236559	0.0714285714285714	0	0.00460829493087558	7.61711574142518	23.5697253016727
7	10	Max_Diff_CorrelationDetector	1	296	336	50	50	0	0.0595238095238095	0.148809523809524	0.413690476190476	0.117647058823529	0	0.0141843971631206	8.77703264748236	28.8758826590833
7	10	Max_Diff_CorrelationDetector	0	174	165	98	98	0	0.363636363636364	0.593939393939394	0.745454545454545	0.269230769230769	0	NaN	6.21972670952508	21.8051652931411
7	10	Max_Diff_CorrelationDetector	1	173	224	81	81	0	0.221238938053097	0.361607142857143	0.633928571428571	0.333333333333333	0	0.0526315789473684	7.72851348072799	26.1679836398735
7	10	Max_Diff_CorrelationDetector	2	313	448	139	139	0	0.14344262295082	0.310267857142857	0.53125	0.436363636363636	0.147058823529412	0.0355029585798817	8.58231824513882	28.3230138860327
7	10	Max_Diff_CorrelationDetector	3	295	359	79	79	0	0.066079295154185	0.220055710306407	0.412256267409471	0.206896551724138	0	0.00628930817610063	8.08685598043618	27.8454440906749
7	10	Max_Diff_CorrelationDetector	1	252	199	35	35	0	0.0434782608695652	0.175879396984925	0.35678391959799	0.0769230769230769	0	0	5.96258438737215	22.4710471616401
7	10	Max_Diff_CorrelationDetector	2	253	269	27	27	0	0.0227272727272727	0.100371747211896	0.323420074349442	0.0666666666666667	0.0384615384615385	0	6.23165920570553	22.5046055381872
7	10	Max_Diff_CorrelationDetector	3	407	600	66	66	0	0.0448179271708683	0.11	0.351666666666667	0.2	0.0263157894736842	0.0241935483870968	5.95662071710997	20.9662891237316
7	10	Max_Diff_CorrelationDetector	0	236	178	54	54	0	0.156716417910448	0.303370786516854	0.48876404494382	0.260869565217391	0	0.173913043478261	6.23305719186568	21.8048506272124
7	10	Max_Diff_CorrelationDetector	4	541	869	163	163	0	0.041044776119403	0.187571921749137	0.420023014959724	0.177777777777778	0	0.0149253731343284	10.1265378106911	31.6957651587701
7	10	Max_Diff_CorrelationDetector	5	305	552	155	155	0	0.139784946236559	0.280797101449275	0.528985507246377	0.218181818181818	0.0425531914893617	0.0878378378378378	10.3915502527497	32.5152803102212
7	10	Max_Diff_CorrelationDetector	2	336	352	61	61	0	0.0807692307692308	0.173295454545455	0.414772727272727	0.0526315789473684	0	0.0215827338129496	8.85186182201862	28.8511712460549
7	10	Max_Diff_CorrelationDetector	0	152	103	36	36	0	0.18	0.349514563106796	0.660194174757282	0.137254901960784	0.142857142857143	NaN	6.5238602442959	23.2867058504829
7	10	Max_Diff_CorrelationDetector	1	238	283	60	60	0	0.0617283950617284	0.212014134275618	0.530035335689046	0.219512195121951	0	0	7.45312675857577	23.3330967190399
7	10	Max_Diff_CorrelationDetector	0	282	325	78	78	0	0.0904977375565611	0.24	0.646153846153846	0.12962962962963	0.0967741935483871	0.0555555555555556	8.86454321605233	28.5706609267923
7	10	Max_Diff_CorrelationDetector	2	318	577	111	111	0	0.0647482014388489	0.192374350086655	0.433275563258232	0.186046511627907	0.113207547169811	0.0166666666666667	6.82146845178785	23.4181245082017
7	10	Max_Diff_CorrelationDetector	1	260	286	84	84	0	0.112426035502959	0.293706293706294	0.472027972027972	0.177777777777778	0.0384615384615385	0.074468085106383	6.99954243672243	24.0272142979229
7	10	Max_Diff_CorrelationDetector	5	420	546	105	105	0	0.0345744680851064	0.192307692307692	0.360805860805861	0.162790697674419	0.0238095238095238	0.0158102766798419	8.37765514587181	26.7013262095924
7	10	Max_Diff_CorrelationDetector	1	285	282	38	38	0	0.0421052631578947	0.134751773049645	0.354609929078014	0.137254901960784	0	0.008	6.04357849595606	21.6741239116709
7	10	Max_Diff_CorrelationDetector	1	255	240	56	56	0	0.131782945736434	0.233333333333333	0.508333333333333	0.194444444444444	0.111111111111111	0.0701754385964912	7.25203930527712	25.5212704897073
7	10	Max_Diff_CorrelationDetector	1	249	181	36	36	0	0.0603448275862069	0.198895027624309	0.419889502762431	0.151515151515152	0.0555555555555556	0.0185185185185185	6.59533833122403	23.4956918544644
7	10	Max_Diff_CorrelationDetector	1	185	118	40	40	0	0.102941176470588	0.338983050847458	0.635593220338983	0.116279069767442	0	0	5.87044836962799	20.8235751690355
7	10	Max_Diff_CorrelationDetector	2	289	313	38	38	0	0.0368663594470046	0.121405750798722	0.351437699680511	0.104166666666667	0	0.0151515151515152	7.0990450426272	25.4614937914605
7	10	Max_Diff_CorrelationDetector	1	283	264	50	50	0	0.050251256281407	0.189393939393939	0.348484848484849	0.128205128205128	0.037037037037037	0.00854700854700855	7.02971855680959	23.7564549850503
7	10	Max_Diff_CorrelationDetector	5	291	619	170	170	0	0.105882352941176	0.274636510500808	0.473344103392569	0.333333333333333	0.0645161290322581	0.00649350649350649	9.42182582901275	30.4128074943405
7	10	Max_Diff_CorrelationDetector	2	246	281	68	68	0	0.0751445086705202	0.241992882562278	0.512455516014235	0.174603174603175	0.0588235294117647	0	8.25026099189698	26.6907494668764
7	10	Max_Diff_CorrelationDetector	1	153	214	122	122	0	0.348314606741573	0.570093457943925	0.752336448598131	0.390625	0	0	8.10852116688724	27.5161078289935
7	10	Max_Diff_CorrelationDetector	3	271	332	46	46	0	0.0574162679425837	0.13855421686747	0.358433734939759	0.0816326530612245	0.0606060606060606	0.0241935483870968	9.29593051475813	28.729986343053
7	10	Max_Diff_CorrelationDetector	3	370	410	40	40	0	0.0448717948717949	0.0975609756097561	0.282926829268293	0.125	0.0256410256410256	0.0315315315315315	7.01337868831946	23.8548871327246
7	10	Max_Diff_CorrelationDetector	5	337	473	95	95	0	0.046594982078853	0.200845665961945	0.424947145877378	0.191489361702128	0	0	8.00010809147834	25.1624801363417
7	10	Max_Diff_CorrelationDetector	1	288	253	25	25	0	0.0619047619047619	0.0988142292490119	0.284584980237154	0.0888888888888889	0	0.0510948905109489	6.45597166491274	23.0825169145497
7	10	Max_Diff_CorrelationDetector	2	362	521	109	109	0	0.0771604938271605	0.209213051823417	0.410748560460653	0.225806451612903	0.109090909090909	0.043010752688172	7.83576447224601	26.4856482687592
7	10	Max_Diff_CorrelationDetector	2	279	328	89	89	0	0.135964912280702	0.271341463414634	0.460365853658537	0.309090909090909	0	0.0970149253731343	8.88309115440642	28.9774523303422
7	10	Max_Diff_CorrelationDetector	5	432	703	125	125	0	0.0679156908665105	0.177809388335704	0.456614509246088	0.222222222222222	0.0714285714285714	0.0177935943060498	9.46783000140229	28.7284579229163
7	10	Max_Diff_CorrelationDetector	3	304	426	67	67	0	0.0662020905923345	0.157276995305164	0.422535211267606	0.12280701754386	0.155555555555556	0.0217391304347826	9.3588378921919	30.70677975782
7	10	Max_Diff_CorrelationDetector	3	308	278	26	26	0	0.0257510729613734	0.0935251798561151	0.280575539568345	0.0952380952380952	0	0.013986013986014	6.84347225872666	23.1287266710932
10	10	Max_Diff_CorrelationDetector	1	239	328	98	98	0	0.117948717948718	0.298780487804878	0.545731707317073	0.18	0	0.0217391304347826	10.2393760724847	28.3992094482589
10	10	Max_Diff_CorrelationDetector	0	188	217	78	78	0	0.166666666666667	0.359447004608295	0.612903225806452	0.283018867924528	0	0	8.26937057393347	24.3726495736794
10	10	Max_Diff_CorrelationDetector	2	304	238	47	47	0	0.0578947368421053	0.197478991596639	0.369747899159664	0.0645161290322581	0.1	0.0165289256198347	8.51930256410859	24.7450962512996
10	10	Max_Diff_CorrelationDetector	2	352	313	42	42	0	0.0459770114942529	0.134185303514377	0.246006389776358	0.195121951219512	0	0	7.93287682878837	23.6370984357789
10	10	Max_Diff_CorrelationDetector	3	264	495	176	176	0	0.219387755102041	0.355555555555556	0.622222222222222	0.318181818181818	0.0909090909090909	0.184466019417476	10.7943856858716	30.652853840456
10	10	Max_Diff_CorrelationDetector	3	397	630	145	145	0	0.0873493975903614	0.23015873015873	0.517460317460318	0.142857142857143	0	0.084	10.1038671551626	29.3368809932367
10	10	Max_Diff_CorrelationDetector	3	330	356	37	37	0	0.0561797752808989	0.103932584269663	0.334269662921348	0.0625	0.128205128205128	0	7.54005711956285	23.2399537902742
10	10	Max_Diff_CorrelationDetector	3	434	587	92	92	0	0.0750670241286863	0.156729131175468	0.465076660988075	0.137931034482759	0.0833333333333333	0.0549828178694158	10.0862164947772	28.3195195828452
10	10	Max_Diff_CorrelationDetector	5	403	537	125	125	0	0.0584795321637427	0.232774674115456	0.499068901303538	0.195652173913043	0.0909090909090909	0.0298507462686567	11.4858171600369	32.0173535456006
10	10	Max_Diff_CorrelationDetector	1	213	306	70	70	0	0.147540983606557	0.228758169934641	0.571895424836601	0.241379310344828	0.0384615384615385	0.0760869565217391	9.9141936653756	27.807535563973
10	10	Max_Diff_CorrelationDetector	2	231	185	66	66	0	0.222222222222222	0.356756756756757	0.616216216216216	0.314285714285714	0.0833333333333333	0.0487804878048781	9.95654144694956	30.3844901625442
10	10	Max_Diff_CorrelationDetector	2	221	271	116	116	0	0.1875	0.428044280442804	0.579335793357934	0.43859649122807	0	0.0144927536231884	10.3811964385949	29.9002106567588
10	10	Max_Diff_CorrelationDetector	3	371	701	199	199	0	0.116991643454039	0.283880171184023	0.566333808844508	0.210526315789474	0.0666666666666667	0.065843621399177	10.789649449448	30.4524045090637
10	10	Max_Diff_CorrelationDetector	3	320	559	104	104	0	0.0576923076923077	0.186046511627907	0.520572450805009	0.0930232558139535	0.137254901960784	0.0238095238095238	8.85322642091436	26.2991298999124
10	10	Max_Diff_CorrelationDetector	2	359	466	126	126	0	0.136690647482014	0.270386266094421	0.504291845493562	0.2	0.159090909090909	0.0526315789473684	10.6101586514777	30.7412354595599
10	10	Max_Diff_CorrelationDetector	5	316	485	154	154	0	0.135714285714286	0.317525773195876	0.591752577319588	0.306122448979592	0.0714285714285714	0.06875	11.3080942758921	30.9920503640535
10	10	Max_Diff_CorrelationDetector	3	277	299	59	59	0	0.105263157894737	0.197324414715719	0.434782608695652	0.255813953488372	0.024390243902439	0.0454545454545455	11.4918541191176	31.5143852354441
10	10	Max_Diff_CorrelationDetector	1	414	430	108	108	0	0.078125	0.251162790697674	0.47906976744186	0.333333333333333	0.0357142857142857	0.0416666666666667	8.87329634723178	26.3228453117091
10	10	Max_Diff_CorrelationDetector	0	241	348	138	138	0	0.342281879194631	0.396551724137931	0.744252873563218	0.385964912280702	0	0.0714285714285714	10.4252476501708	29.6270309084431
10	10	Max_Diff_CorrelationDetector	4	320	509	130	130	0	0.133779264214047	0.255402750491159	0.575638506876228	0.25	0.121951219512195	0.0707070707070707	11.3416934781936	31.6768958349033
10	10	Max_Diff_CorrelationDetector	1	237	161	21	21	0	0.0533333333333333	0.130434782608696	0.279503105590062	0.155555555555556	0	0	8.40622617114959	26.9880395355689
10	10	Max_Diff_CorrelationDetector	1	261	231	50	50	0	0.130890052356021	0.216450216450216	0.454545454545455	0.276923076923077	0	0.0583333333333333	8.51637956348822	26.4444266862855
10	10	Max_Diff_CorrelationDetector	0	277	413	148	148	0	0.209876543209877	0.358353510895884	0.736077481840194	0.355555555555556	0.203703703703704	0.0612244897959184	12.0465942368222	32.8464701571585
10	10	Max_Diff_CorrelationDetector	2	313	330	81	81	0	0.12396694214876	0.245454545454545	0.454545454545455	0.269230769230769	0.21875	0.0308641975308642	9.42704007367557	28.0901824662012
10	10	Max_Diff_CorrelationDetector	1	216	419	165	165	0	0.191588785046729	0.393794749403341	0.570405727923628	0.326923076923077	0.241935483870968	0.0185185185185185	10.9718551785318	30.1783192549274
10	10	Max_Diff_CorrelationDetector	1	230	173	34	34	0	0.114754098360656	0.196531791907514	0.421965317919075	0.170212765957447	0	0	8.33340999835711	25.7401269482519
10	10	Max_Diff_CorrelationDetector	1	324	491	113	113	0	0.107407407407407	0.230142566191446	0.537678207739308	0.225	0.0487804878048781	0.0466666666666667	10.8083790413996	29.9260385366568
10	10	Max_Diff_CorrelationDetector	2	362	386	73	73	0	0.0821917808219178	0.189119170984456	0.520725388601036	0.303030303030303	0	0.0298507462686567	10.2200453109708	28.7013659230877
10	10	Max_Diff_CorrelationDetector	3	280	341	84	84	0	0.0808080808080808	0.24633431085044	0.49266862170088	0.2	0.0638297872340425	0.0535714285714286	9.41960005573888	27.9071188447286
10	10	Max_Diff_CorrelationDetector	1	272	361	129	129	0	0.196891191709845	0.357340720221607	0.642659279778393	0.357142857142857	0.114285714285714	0.144578313253012	11.4356682558022	31.1992537440322
20	10	Max_Diff_CorrelationDetector	1	294	562	269	269	0	0.208029197080292	0.47864768683274	0.704626334519573	0.314814814814815	0.0769230769230769	0.0384615384615385	20.7939766418228	38.8810815897809
20	10	Max_Diff_CorrelationDetector	3	306	418	152	152	0	0.141176470588235	0.363636363636364	0.578947368421053	0.452380952380952	0.18	0.0254777070063694	18.4300650300076	38.5847520710936
20	10	Max_Diff_CorrelationDetector	2	277	335	152	152	0	0.0930232558139535	0.453731343283582	0.719402985074627	0.207547169811321	0.0526315789473684	0.0357142857142857	16.9796669450996	34.8297991203494
20	10	Max_Diff_CorrelationDetector	3	323	605	241	241	0	0.189189189189189	0.398347107438017	0.601652892561984	0.44	0.108108108108108	0.106382978723404	18.1916439879013	36.5608418712446
20	10	Max_Diff_CorrelationDetector	0	191	116	58	58	0	0.219178082191781	0.5	0.706896551724138	0.26	0	0.157894736842105	15.0936737625053	33.5005375490152
20	10	Max_Diff_CorrelationDetector	2	213	325	150	150	0	0.175324675324675	0.461538461538462	0.676923076923077	0.410714285714286	0	0.0138888888888889	17.4846934179748	35.2079527344228
20	10	Max_Diff_CorrelationDetector	4	388	495	147	147	0	0.0801282051282051	0.296969696969697	0.535353535353535	0.131578947368421	0.0769230769230769	0.0686695278969957	17.3415530090374	34.9057149706925
20	10	Max_Diff_CorrelationDetector	0	250	271	115	115	0	0.169811320754717	0.424354243542435	0.789667896678967	0.333333333333333	0.233333333333333	0.136363636363636	16.2988117406514	33.6676763677002
20	10	Max_Diff_CorrelationDetector	1	217	345	196	196	0	0.368055555555556	0.568115942028986	0.872463768115942	0.469387755102041	0.285714285714286	0.125	17.1987471519039	33.5919928277459
20	10	Max_Diff_CorrelationDetector	1	236	370	168	168	0	0.239024390243902	0.454054054054054	0.727027027027027	0.365384615384615	0.321428571428571	0.0375	18.2787425096632	37.4837668177554
20	10	Max_Diff_CorrelationDetector	1	200	245	165	165	0	0.411764705882353	0.673469387755102	0.820408163265306	0.474576271186441	0.25	0.303030303030303	17.9306408882999	36.4483828961699
20	10	Max_Diff_CorrelationDetector	3	204	437	212	212	0	0.262820512820513	0.48512585812357	0.762013729977117	0.41304347826087	0.22	0.0909090909090909	18.4381140822196	36.2418296462949
20	10	Max_Diff_CorrelationDetector	0	206	278	129	129	0	0.233576642335766	0.464028776978417	0.705035971223022	0.344827586206897	0.105263157894737	0	16.4218045002881	33.6603683975633
20	10	Max_Diff_CorrelationDetector	2	227	186	79	79	0	0.185483870967742	0.424731182795699	0.60752688172043	0.388888888888889	0	0	17.4348588993691	35.9994403062557
20	10	Max_Diff_CorrelationDetector	3	386	561	193	193	0	0.24251497005988	0.344028520499109	0.568627450980392	0.66	0	0.0945945945945946	19.007164191446	37.1082890550576
20	10	Max_Diff_CorrelationDetector	1	202	214	112	112	0	0.314516129032258	0.523364485981308	0.831775700934579	0.345454545454545	0.142857142857143	0.105263157894737	16.473878526638	33.209482358665
20	10	Max_Diff_CorrelationDetector	0	138	205	109	109	0	0.483870967741935	0.531707317073171	0.921951219512195	0.430769230769231	0.470588235294118	0.5	17.8297669170319	36.107248093656
20	10	Max_Diff_CorrelationDetector	2	346	476	182	182	0	0.151202749140893	0.382352941176471	0.626050420168067	0.392156862745098	0.184210526315789	0.0731707317073171	19.9771317306135	38.5504076913376
20	10	Max_Diff_CorrelationDetector	1	290	441	182	182	0	0.16256157635468	0.412698412698413	0.689342403628118	0.473684210526316	0.25	0.0530973451327434	17.120763547506	35.9325716961308
20	10	Max_Diff_CorrelationDetector	1	242	234	75	75	0	0.131944444444444	0.320512820512821	0.662393162393162	0.171428571428571	0.0540540540540541	0.0204081632653061	15.6419397480707	33.8970615918801
20	10	Max_Diff_CorrelationDetector	0	193	204	124	124	0	0.489130434782609	0.607843137254902	0.857843137254902	0.482142857142857	0.111111111111111	0.4375	16.8464288083152	36.6318399927881
20	10	Max_Diff_CorrelationDetector	1	205	128	59	59	0	0.296296296296296	0.4609375	0.671875	0.365853658536585	0	0	15.0634101750457	35.1045830103929
20	10	Max_Diff_CorrelationDetector	2	314	294	88	88	0	0.101941747572816	0.299319727891156	0.465986394557823	0.351851851851852	0	0.00684931506849315	16.6331479394584	35.3266792086386
20	10	Max_Diff_CorrelationDetector	2	260	514	271	271	0	0.244444444444444	0.527237354085603	0.719844357976654	0.571428571428571	0.0967741935483871	0.0819672131147541	19.6419596584733	39.578371007643
20	10	Max_Diff_CorrelationDetector	3	252	255	115	115	0	0.239263803680982	0.450980392156863	0.654901960784314	0.446808510638298	0.25	0.0804597701149425	15.8818376743135	34.4527781179886
20	10	Max_Diff_CorrelationDetector	2	327	452	194	194	0	0.195918367346939	0.429203539823009	0.676991150442478	0.581395348837209	0.0714285714285714	0.047244094488189	17.9712662022072	37.5325078599678
20	10	Max_Diff_CorrelationDetector	1	232	179	63	63	0	0.211920529801325	0.35195530726257	0.592178770949721	0.230769230769231	0.0416666666666667	0.112676056338028	16.3778372257766	34.8417477537125
20	10	Max_Diff_CorrelationDetector	1	263	305	119	119	0	0.175531914893617	0.390163934426229	0.570491803278689	0.51219512195122	0.0303030303030303	0	15.8613388282715	33.631302230834
20	10	Max_Diff_CorrelationDetector	0	166	124	101	101	0	0.622950819672131	0.814516129032258	0.959677419354839	0.476190476190476	NaN	0	16.6008060105967	35.5629513552778
20	10	Max_Diff_CorrelationDetector	0	246	244	104	104	0	0.251700680272109	0.426229508196721	0.737704918032787	0.391304347826087	0.230769230769231	0.0806451612903226	18.2759165455056	36.6417645660853
20	10	Max_Diff_CorrelationDetector	1	217	188	81	81	0	0.192982456140351	0.430851063829787	0.622340425531915	0.375	0	0.0169491525423729	14.0440711774237	31.0008444003943
20	10	Max_Diff_CorrelationDetector	3	225	306	99	99	0	0.147651006711409	0.323529411764706	0.643790849673203	0.25531914893617	0.0909090909090909	0.0161290322580645	16.09837173258	34.0172055660503
20	10	Max_Diff_CorrelationDetector	1	219	269	128	128	0	0.294117647058824	0.475836431226766	0.75092936802974	0.482142857142857	0.25	0.0714285714285714	18.8036298755542	38.4214748143556
20	10	Max_Diff_CorrelationDetector	2	291	429	149	149	0	0.120300751879699	0.347319347319347	0.624708624708625	0.28	0	0.0939597315436242	18.494800310496	36.4123490527059
20	10	Max_Diff_CorrelationDetector	3	307	496	202	202	0	0.219858156028369	0.407258064516129	0.707661290322581	0.489795918367347	0.222222222222222	0.0296296296296296	17.7504156392027	36.6037836904249
20	10	Max_Diff_CorrelationDetector	1	213	341	213	213	0	0.435897435897436	0.624633431085044	0.87683284457478	0.531914893617021	0.32	0.0625	19.0003082994252	37.3248927867745
20	10	Max_Diff_CorrelationDetector	4	344	525	187	187	0	0.168965517241379	0.356190476190476	0.664761904761905	0.363636363636364	0.125	0.122093023255814	17.3671021669202	34.3847205104033
20	10	Max_Diff_CorrelationDetector	1	329	422	176	176	0	0.25	0.417061611374408	0.672985781990521	0.365853658536585	0.243243243243243	0.0894308943089431	19.0684798984634	38.9435583069956
20	10	Max_Diff_CorrelationDetector	2	266	330	150	150	0	0.218934911242604	0.454545454545455	0.703030303030303	0.41304347826087	0.0909090909090909	0.121951219512195	18.4931417632312	37.7359097653398
20	10	Max_Diff_CorrelationDetector	2	267	269	97	97	0	0.21	0.360594795539033	0.698884758364312	0.5	0.0882352941176471	0.0537634408602151	17.9917884802392	36.8214434060386
20	10	Max_Diff_CorrelationDetector	2	286	265	108	108	0	0.172839506172839	0.407547169811321	0.686792452830189	0.441176470588235	0.25	0.0114942528735632	14.9253983138657	34.2985365527899
20	10	Max_Diff_CorrelationDetector	1	202	167	92	92	0	0.230769230769231	0.550898203592814	0.74251497005988	0.380952380952381	0	0	14.5075232095667	33.3121277541003
20	10	Max_Diff_CorrelationDetector	2	274	174	61	61	0	0.169014084507042	0.350574712643678	0.609195402298851	0.277777777777778	0.181818181818182	0.0581395348837209	14.9544009149856	33.8892714555872
20	10	Max_Diff_CorrelationDetector	0	228	193	101	101	0	0.310344827586207	0.523316062176166	0.83419689119171	0.448979591836735	0.181818181818182	0	16.0664921605266	34.5107922516454
20	10	Max_Diff_CorrelationDetector	1	240	623	306	306	0	0.224576271186441	0.491171749598716	0.690208667736758	0.506666666666667	0.142857142857143	0.0746268656716418	19.3399215657475	37.5760166379495
20	10	Max_Diff_CorrelationDetector	0	252	201	80	80	0	0.222222222222222	0.398009950248756	0.691542288557214	0.175	0.266666666666667	0	15.6862273685026	35.6237961239439
20	10	Max_Diff_CorrelationDetector	0	190	136	95	95	0	0.530612244897959	0.698529411764706	0.882352941176471	0.446808510638298	0	NaN	15.4898615957693	34.9381945567801
20	10	Max_Diff_CorrelationDetector	1	304	429	183	183	0	0.24904214559387	0.426573426573427	0.610722610722611	0.365384615384615	0.171428571428571	0.078125	18.5652593770912	36.8894487913494
20	10	Max_Diff_CorrelationDetector	3	355	385	123	123	0	0.186206896551724	0.319480519480519	0.612987012987013	0.419354838709677	0.0789473684210526	0.130208333333333	14.5810003074899	30.2986624889472
20	10	Max_Diff_CorrelationDetector	1	234	403	209	209	0	0.226130653266332	0.518610421836228	0.759305210918114	0.44	0.25531914893617	0.126984126984127	18.1826430020316	36.4438627053316
20	10	Max_Diff_CorrelationDetector	0	179	201	144	144	0	0.451219512195122	0.716417910447761	0.845771144278607	0.6	0	0.0588235294117647	14.9961470880407	32.9230832390828
20	10	Max_Diff_CorrelationDetector	3	341	612	238	238	0	0.136904761904762	0.388888888888889	0.612745098039216	0.370967741935484	0.209302325581395	0.0476190476190476	19.3127122106372	36.4359918328361
20	10	Max_Diff_CorrelationDetector	2	361	315	96	96	0	0.118852459016393	0.304761904761905	0.511111111111111	0.555555555555556	0	0.064327485380117	13.9517129720081	30.2498541923475
20	10	Max_Diff_CorrelationDetector	2	331	220	45	45	0	0.0478723404255319	0.204545454545455	0.45	0.178571428571429	0.0869565217391304	0.0194174757281553	15.2813986478676	33.9086578774243
20	10	Max_Diff_CorrelationDetector	1	223	102	54	54	0	0.178571428571429	0.529411764705882	0.735294117647059	0.205882352941176	0	0.0909090909090909	14.5025262465085	33.4657040100284
20	10	Max_Diff_CorrelationDetector	5	414	756	235	235	0	0.105651105651106	0.310846560846561	0.600529100529101	0.283333333333333	0.119047619047619	0.0618556701030928	19.7406896379811	38.8516079032147
20	10	Max_Diff_CorrelationDetector	1	292	376	149	149	0	0.153465346534653	0.396276595744681	0.627659574468085	0.448979591836735	0.0952380952380952	0.0078740157480315	16.6289915047665	34.4805736742851
20	10	Max_Diff_CorrelationDetector	0	183	238	120	120	0	0.325	0.504201680672269	0.798319327731092	0.5	0.105263157894737	0.333333333333333	14.6060914381045	30.4930328350445
20	10	Max_Diff_CorrelationDetector	1	261	197	49	49	0	0.125	0.248730964467005	0.593908629441624	0.260869565217391	0.0555555555555556	0.0674157303370786	15.8120933774382	35.533006035161
20	10	Max_Diff_CorrelationDetector	1	200	281	121	121	0	0.173333333333333	0.430604982206406	0.747330960854093	0.28	0.0526315789473684	0.0222222222222222	16.6025361051412	34.5338897325969
2	10	Max_Diff_CorrelationDetector	5	574	874	19	19	0	0.0126353790613718	0.0217391304347826	0.0938215102974828	0.0714285714285714	0.0363636363636364	0.00433839479392625	2.34610284786599	6.28920232627182
2	10	Max_Diff_CorrelationDetector	2	436	434	13	13	0	0.0259365994236311	0.0299539170506912	0.158986175115207	0	0.0540540540540541	0.0252707581227437	2.81364815270305	7.41654463749021
2	10	Max_Diff_CorrelationDetector	4	423	548	11	11	0	0.00767263427109974	0.0200729927007299	0.0748175182481752	0	0.0384615384615385	0	1.44621060862451	2.13454443482741
2	10	Max_Diff_CorrelationDetector	4	312	440	17	17	0	0	0.0386363636363636	0.156818181818182	0	0	0	1.56888561755063	2.84111531621553
2	10	Max_Diff_CorrelationDetector	4	480	680	5	5	0	0	0.00735294117647059	0.0470588235294118	0	0	0	0.713104523543804	0.160547343809355
2	10	Max_Diff_CorrelationDetector	3	386	323	3	3	0	0.0068259385665529	0.00928792569659443	0.065015479876161	0.05	0	0.00490196078431373	1.28650837234734	1.76968889001124
2	10	Max_Diff_CorrelationDetector	3	335	455	20	20	0	0.00374531835205993	0.043956043956044	0.112087912087912	0	0.02	0	0.913282027570791	0.653185042214415
2	10	Max_Diff_CorrelationDetector	4	429	572	12	12	0	0	0.020979020979021	0.0926573426573427	0	0	0	1.38367599254188	1.88264387874724
2	10	Max_Diff_CorrelationDetector	3	329	537	8	8	0	0	0.0148975791433892	0.074487895716946	0	0	0	1.12509453171173	1.51712938003878
2	10	Max_Diff_CorrelationDetector	2	293	302	7	7	0	0.0131004366812227	0.0231788079470199	0.0728476821192053	0.06	0	0	1.21863488985107	1.8273863313538
2	10	Max_Diff_CorrelationDetector	3	330	349	6	6	0	0.00420168067226891	0.0171919770773639	0.0744985673352436	0	0.0256410256410256	0	1.26051750346563	1.55820142588393
2	10	Max_Diff_CorrelationDetector	4	466	558	6	6	0	0	0.010752688172043	0.0537634408602151	0	0	0	1.24165725354906	0.955884443550484
2	10	Max_Diff_CorrelationDetector	3	377	408	21	21	0	0	0.0514705882352941	0.115196078431373	0	0	0	1.43927709147866	0.927463992004149
2	10	Max_Diff_CorrelationDetector	4	340	369	6	6	0	0.0111111111111111	0.016260162601626	0.100271002710027	0	0.0444444444444444	0.00632911392405063	1.74481536742586	2.76049013236638
2	10	Max_Diff_CorrelationDetector	4	340	527	17	17	0	0	0.032258064516129	0.108159392789374	0	0	0	1.36318467516529	3.37501269584936
2	10	Max_Diff_CorrelationDetector	3	473	594	6	6	0	0.00224215246636771	0.0101010101010101	0.0656565656565657	0.0232558139534884	0	0	1.42748939899878	2.23251102534727
2	10	Max_Diff_CorrelationDetector	4	444	474	2	2	0	0	0.00421940928270042	0.0548523206751055	0	0	0	1.2158548376868	1.5999607647419
2	10	Max_Diff_CorrelationDetector	5	417	458	16	16	0	0.0108991825613079	0.0349344978165939	0.091703056768559	0.0851063829787234	0	0	1.66454246513414	2.90994069613991
2	10	Max_Diff_CorrelationDetector	4	711	959	7	7	0	0.00424328147100424	0.0072992700729927	0.0625651720542232	0	0	0.0046656298600311	1.34463839834829	0.862521048091554
2	10	Max_Diff_CorrelationDetector	2	253	174	2	2	0	0	0.0114942528735632	0.0804597701149425	0	0	0	1.53910871539566	3.20423067774044
2	10	Max_Diff_CorrelationDetector	4	482	838	34	34	0	0.00836820083682008	0.0405727923627685	0.139618138424821	0.08	0	0	1.81707755882194	4.5325247702337
2	10	Max_Diff_CorrelationDetector	2	424	467	19	19	0	0.0026525198938992	0.0406852248394004	0.141327623126338	0.0188679245283019	0	0	2.07728451514797	6.14023735033573
2	10	Max_Diff_CorrelationDetector	4	407	465	11	11	0	0.0155440414507772	0.0236559139784946	0.0731182795698925	0.04	0	0.0034965034965035	1.35071574931469	2.34494270805082
2	10	Max_Diff_CorrelationDetector	4	530	545	4	4	0	0.00642398286937901	0.0073394495412844	0.0844036697247706	0	0.0222222222222222	0.00498753117206983	1.90754171929796	4.25093646741936
2	10	Max_Diff_CorrelationDetector	4	346	331	6	6	0	0	0.0181268882175227	0.0332326283987915	0	0	0	1.05051470120324	0.842843660794676
2	10	Max_Diff_CorrelationDetector	3	275	364	8	8	0	0	0.021978021978022	0.0879120879120879	0	0	0	1.21184331113676	1.39481248480964
2	10	Max_Diff_CorrelationDetector	6	364	581	26	26	0	0.0255681818181818	0.044750430292599	0.101549053356282	0.0833333333333333	0.0588235294117647	0.00396825396825397	2.27104784616213	5.43786382889934
2	10	Max_Diff_CorrelationDetector	1	213	211	9	9	0	0.0072463768115942	0.042654028436019	0.170616113744076	0.0163934426229508	0	0	2.63802789867453	10.4766176135824
2	10	Max_Diff_CorrelationDetector	1	281	346	15	15	0	0.00884955752212389	0.0433526011560694	0.11849710982659	0.0487804878048781	0	0	1.52179427479722	4.33491972323219
2	10	Max_Diff_CorrelationDetector	5	519	651	18	18	0	0.004	0.0276497695852535	0.0614439324116743	0	0.0277777777777778	0	2.00539597059456	4.59493575753057
2	10	Max_Diff_CorrelationDetector	3	271	309	10	10	0	0.00458715596330275	0.0323624595469256	0.12621359223301	0.0185185185185185	0	0	1.74176529369946	0.927016987285781
2	10	Max_Diff_CorrelationDetector	5	492	490	17	17	0	0.0266990291262136	0.0346938775510204	0.126530612244898	0	0.0697674418604651	0.0258899676375405	2.04247836848826	1.53063174168892
2	10	Max_Diff_CorrelationDetector	4	543	681	19	19	0	0.00784313725490196	0.0279001468428781	0.102790014684288	0.024390243902439	0	0.00681818181818182	1.87087826689313	4.45847007217974
2	10	Max_Diff_CorrelationDetector	4	491	602	22	22	0	0.019271948608137	0.0365448504983389	0.146179401993355	0.150943396226415	0	0.00255754475703325	2.03203812598319	6.34475557370701
2	10	Max_Diff_CorrelationDetector	2	309	470	34	34	0	0.042483660130719	0.0723404255319149	0.178723404255319	0.17910447761194	0.024390243902439	0	1.91832677901549	5.65626454914166
2	10	Max_Diff_CorrelationDetector	5	700	893	17	17	0	0.00575539568345324	0.019036954087346	0.114221724524076	0	0	0.00646203554119548	2.55996885700079	8.20715829268406
2	10	Max_Diff_CorrelationDetector	3	354	338	0	0	0	0	0	0.0650887573964497	0	0	0	1.71649599121184	1.57726197494753
2	10	Max_Diff_CorrelationDetector	1	247	259	15	15	0	0.0289017341040462	0.0579150579150579	0.16988416988417	0.0625	0.0645161290322581	0	1.97295620463729	2.73566403602415
2	10	Max_Diff_CorrelationDetector	4	531	701	15	15	0	0.0022271714922049	0.021398002853067	0.0898716119828816	0.0285714285714286	0	0	1.4683996888228	1.71155131668275
2	10	Max_Diff_CorrelationDetector	3	385	393	5	5	0	0.0120845921450151	0.0127226463104326	0.0763358778625954	0.0256410256410256	0	0.0118110236220472	1.35839650054896	2.07251343770135
2	10	Max_Diff_CorrelationDetector	7	490	720	21	21	0	0.00961538461538462	0.0291666666666667	0.109722222222222	0	0	0.0115942028985507	1.72779285835256	2.95648725191349
2	10	Max_Diff_CorrelationDetector	3	336	397	20	20	0	0.0191693290734824	0.0503778337531486	0.151133501259446	0.0645161290322581	0	0.00858369098712446	1.72149221010701	2.56614803743592
2	10	Max_Diff_CorrelationDetector	3	290	372	3	3	0	0	0.00806451612903226	0.0456989247311828	0	0	0	0.988701516185989	0.863428217868691
2	10	Max_Diff_CorrelationDetector	3	408	517	4	4	0	0	0.00773694390715667	0.0735009671179884	0	0	0	1.60892167585901	3.00147275439291
2	10	Max_Diff_CorrelationDetector	1	235	186	1	1	0	0	0.00537634408602151	0.139784946236559	0	0	0	0.984385344270949	0.592959177615265
2	10	Max_Diff_CorrelationDetector	3	384	664	20	20	0	0.00597014925373134	0.0301204819277108	0.102409638554217	0.0408163265306122	0	0	1.19587185971212	0.777769318058926
2	10	Max_Diff_CorrelationDetector	7	567	804	23	23	0	0.0124777183600713	0.0286069651741294	0.0708955223880597	0.024390243902439	0.0196078431372549	0.0105485232067511	1.23902869713079	1.03556341391783
2	10	Max_Diff_CorrelationDetector	3	280	395	8	8	0	0.0125	0.020253164556962	0.126582278481013	0	0	0.0202020202020202	1.58255381156942	2.95056774784395
2	10	Max_Diff_CorrelationDetector	0	296	459	25	25	0	0.0396825396825397	0.0544662309368192	0.128540305010893	0.0188679245283019	0	0.0072463768115942	1.55557967551561	1.25399215065872
2	10	Max_Diff_CorrelationDetector	3	256	133	8	8	0	0.036036036036036	0.0601503759398496	0.218045112781955	0.0638297872340425	0.0625	0	2.03405221959829	4.15618704496028
2	10	Max_Diff_CorrelationDetector	5	415	667	22	22	0	0.0146699266503667	0.0329835082458771	0.095952023988006	0.0196078431372549	0.0192307692307692	0.0128205128205128	1.83596466594213	4.50552745389115
2	10	Max_Diff_CorrelationDetector	3	297	319	4	4	0	0.004	0.0125391849529781	0.0721003134796238	0	0	0	2.16517507612635	5.36037096054581
2	10	Max_Diff_CorrelationDetector	7	608	1069	14	14	0	0	0.0130963517305893	0.0430308699719364	0	0	0	0.920342912095571	0.910222748508585
2	10	Max_Diff_CorrelationDetector	3	357	412	6	6	0	0.0093167701863354	0.0145631067961165	0.0655339805825243	0.0714285714285714	0	0	1.24486642667607	1.7820056251506
2	10	Max_Diff_CorrelationDetector	5	394	529	21	21	0	0.0231884057971014	0.0396975425330813	0.143667296786389	0.0294117647058824	0	0.0241935483870968	1.92488689028981	5.24539908524694
2	10	Max_Diff_CorrelationDetector	3	560	750	21	21	0	0.0126126126126126	0.028	0.121333333333333	0	0	0.0152173913043478	1.94435373888506	4.64744399130571
2	10	Max_Diff_CorrelationDetector	3	334	511	5	5	0	0	0.00978473581213307	0.0489236790606654	0	0	0	1.40273650107033	1.35188833654217
2	10	Max_Diff_CorrelationDetector	2	283	220	1	1	0	0	0.00454545454545455	0.0409090909090909	0	0	0	1.59693048172439	2.7608064938982
2	10	Max_Diff_CorrelationDetector	4	556	704	10	10	0	0.00205338809034908	0.0142045454545455	0.0994318181818182	0	0	0	1.2751213891509	2.18507600889983
2	10	Max_Diff_CorrelationDetector	5	460	493	10	10	0	0.0137741046831956	0.0202839756592292	0.217038539553753	0	0	0.0159235668789809	1.82827685994674	4.17880455036907
3	10	Max_Diff_CorrelationDetector	5	533	606	10	10	0	0	0.0165016501650165	0.0396039603960396	0	0	0	1.23912435667812	2.5790756666028
3	10	Max_Diff_CorrelationDetector	3	323	367	18	18	0	0.0223048327137546	0.0490463215258856	0.220708446866485	0.15625	0.0238095238095238	0	2.46130777817829	8.34365253955249
3	10	Max_Diff_CorrelationDetector	3	411	366	10	10	0	0.00651465798045603	0.0273224043715847	0.087431693989071	0	0	0.0043859649122807	2.78475482146697	9.28474743407073
3	10	Max_Diff_CorrelationDetector	3	244	311	30	30	0	0.0245098039215686	0.0964630225080386	0.173633440514469	0.0149253731343284	0	0.025	3.24131228328543	10.9192025356024
3	10	Max_Diff_CorrelationDetector	2	194	222	18	18	0	0.0431654676258993	0.0810810810810811	0.22972972972973	0.0338983050847458	0.0512820512820513	0.02	3.81768830217821	14.6990599349583
3	10	Max_Diff_CorrelationDetector	4	393	552	26	26	0	0.0162162162162162	0.0471014492753623	0.15036231884058	0.0294117647058824	0.0163934426229508	0	3.34242367895372	13.3918680606431
3	10	Max_Diff_CorrelationDetector	3	380	604	52	52	0	0.0286532951289398	0.0860927152317881	0.205298013245033	0.0540540540540541	0.0151515151515152	0.029045643153527	3.30381657594911	12.3052797371865
3	10	Max_Diff_CorrelationDetector	5	535	942	80	80	0	0.00943396226415094	0.0849256900212314	0.205944798301486	0.0465116279069767	0.0163934426229508	0.00241545893719807	3.72067949601821	14.7424759181035
3	10	Max_Diff_CorrelationDetector	2	321	501	48	48	0	0.0318725099601594	0.0958083832335329	0.333333333333333	0.0512820512820513	0.0285714285714286	0.0282485875706215	2.69686455127411	10.5473556935429
3	10	Max_Diff_CorrelationDetector	3	244	242	35	35	0	0.0886075949367089	0.144628099173554	0.264462809917355	0.241379310344828	0	0	2.68847698054723	7.87533893891176
3	10	Max_Diff_CorrelationDetector	3	255	434	75	75	0	0.0989010989010989	0.172811059907834	0.391705069124424	0.34	0.0434782608695652	0	3.07813359629208	10.5476335804671
3	10	Max_Diff_CorrelationDetector	2	315	260	12	12	0	0.0214592274678112	0.0461538461538462	0.192307692307692	0.0714285714285714	0	0.00757575757575758	2.6271023151643	8.95096385365007
3	10	Max_Diff_CorrelationDetector	2	281	351	24	24	0	0.004739336492891	0.0683760683760684	0.173789173789174	0.024390243902439	0	0	1.94448209929876	6.79718824551364
3	10	Max_Diff_CorrelationDetector	4	368	503	52	52	0	0.0280373831775701	0.10337972166998	0.20675944333996	0.12962962962963	0.0740740740740741	0	2.53985571567429	9.42464790057637
3	10	Max_Diff_CorrelationDetector	3	340	426	31	31	0	0.0078125	0.0727699530516432	0.230046948356808	0.0588235294117647	0	0	3.13503403140958	12.0118627884066
3	10	Max_Diff_CorrelationDetector	2	342	343	40	40	0	0.0812720848056537	0.116618075801749	0.253644314868805	0.163265306122449	0.0689655172413793	0.0289017341040462	2.96131490266113	9.66946843202647
3	10	Max_Diff_CorrelationDetector	2	348	291	4	4	0	0.01171875	0.013745704467354	0.127147766323024	0	0	0.0108108108108108	2.86046729124356	11.5229334344766
3	10	Max_Diff_CorrelationDetector	3	314	250	20	20	0	0.0497512437810945	0.08	0.196	0.205128205128205	0.0344827586206897	0	2.77984623799449	9.6528138595845
3	10	Max_Diff_CorrelationDetector	2	383	335	12	12	0	0.0129032258064516	0.0358208955223881	0.0805970149253731	0.108108108108108	0	0	2.01006548690529	6.78691248961363
3	10	Max_Diff_CorrelationDetector	3	272	486	45	45	0	0.0416666666666667	0.0925925925925926	0.271604938271605	0.0961538461538462	0.0754716981132075	0	3.16211830620923	13.0732562093053
3	10	Max_Diff_CorrelationDetector	1	285	404	19	19	0	0.0132743362831858	0.047029702970297	0.180693069306931	0.0416666666666667	0	0.00757575757575758	2.86559680355567	11.8018570369247
3	10	Max_Diff_CorrelationDetector	5	538	853	86	86	0	0.0187265917602996	0.100820633059789	0.188745603751465	0.192307692307692	0	0	3.69990945322848	14.9346883597584
3	10	Max_Diff_CorrelationDetector	3	431	574	30	30	0	0.0192307692307692	0.0522648083623693	0.186411149825784	0.0612244897959184	0	0.015527950310559	4.19574718521921	15.2377869340075
3	10	Max_Diff_CorrelationDetector	2	314	364	37	37	0	0.0454545454545455	0.101648351648352	0.274725274725275	0.2	0.0612244897959184	0	4.07009614399812	15.395854274833
3	10	Max_Diff_CorrelationDetector	4	443	589	41	41	0	0.0215633423180593	0.0696095076400679	0.217317487266553	0.135135135135135	0	0.0102040816326531	2.5453651868878	9.73769844032872
3	10	Max_Diff_CorrelationDetector	4	312	482	41	41	0	0.0119521912350598	0.0850622406639004	0.184647302904564	0.0545454545454545	0	0	2.0910612623242	6.64847302528259
3	10	Max_Diff_CorrelationDetector	5	529	1068	62	62	0	0.0222672064777328	0.0580524344569288	0.186329588014981	0.171428571428571	0	0.0121359223300971	3.08651182571796	12.2167622100366
3	10	Max_Diff_CorrelationDetector	3	340	327	21	21	0	0.0311284046692607	0.0642201834862385	0.137614678899083	0.171428571428571	0	0	2.08249875180813	7.11028526711238
3	10	Max_Diff_CorrelationDetector	2	265	290	45	45	0	0.0617283950617284	0.155172413793103	0.4	0.0476190476190476	0	0.0714285714285714	4.1279876489774	19.0302386314514
3	10	Max_Diff_CorrelationDetector	3	435	503	76	76	0	0.0681818181818182	0.151093439363817	0.268389662027833	0.176470588235294	0.0294117647058824	0.0553745928338762	4.15682132169712	15.9039967560262
3	10	Max_Diff_CorrelationDetector	5	307	533	33	33	0	0.0243055555555556	0.0619136960600375	0.219512195121951	0.0526315789473684	0	0.0216216216216216	2.43672436643032	9.2394214934776
3	10	Max_Diff_CorrelationDetector	3	547	577	56	56	0	0.071578947368421	0.097053726169844	0.24263431542461	0.103448275862069	0	0.05249343832021	4.40881428996074	18.9573581924698
3	10	Max_Diff_CorrelationDetector	3	409	541	39	39	0	0.0136986301369863	0.0720887245841035	0.275415896487985	0.027027027027027	0	0.00436681222707424	4.43693934498528	18.5111931334494
3	10	Max_Diff_CorrelationDetector	2	262	438	23	23	0	0.0115384615384615	0.0525114155251142	0.162100456621005	0.0289855072463768	0	0	2.2432453764792	7.36512139698022
3	10	Max_Diff_CorrelationDetector	2	300	361	20	20	0	0.024390243902439	0.0554016620498615	0.207756232686981	0.0285714285714286	0.0555555555555556	0	3.2596194518868	13.6998697737312
3	10	Max_Diff_CorrelationDetector	2	437	555	32	32	0	0.0199501246882793	0.0576576576576577	0.223423423423423	0.121951219512195	0	0.00980392156862745	3.71991000803176	14.4806031695919
3	10	Max_Diff_CorrelationDetector	3	294	264	23	23	0	0.0164835164835165	0.0871212121212121	0.238636363636364	0.0487804878048781	0	0.00934579439252336	3.15890073249944	13.0252200757712
3	10	Max_Diff_CorrelationDetector	5	573	925	63	63	0	0.00968992248062015	0.0681081081081081	0.183783783783784	0.0645161290322581	0	0.00659340659340659	2.14327468834628	6.92560072266849
3	10	Max_Diff_CorrelationDetector	3	302	293	21	21	0	0.0155440414507772	0.0716723549488055	0.218430034129693	0.0612244897959184	0	0	3.20917016094007	12.1568334546247
3	10	Max_Diff_CorrelationDetector	2	330	468	43	43	0	0.00666666666666667	0.0918803418803419	0.179487179487179	0.024390243902439	0	0	2.17178324271489	7.14275973032116
3	10	Max_Diff_CorrelationDetector	1	216	380	41	41	0	0.0517241379310345	0.107894736842105	0.268421052631579	0.126984126984127	0.03125	0	2.19621660800431	8.38242751169358
3	10	Max_Diff_CorrelationDetector	1	334	228	7	7	0	0.0222222222222222	0.0307017543859649	0.12719298245614	0.0344827586206897	0	0.0215827338129496	2.65033893998684	10.1446456315507
3	10	Max_Diff_CorrelationDetector	4	535	640	43	43	0	0.0151515151515152	0.0671875	0.1546875	0.0980392156862745	0	0.00684931506849315	2.60767980690914	9.72794673397559
3	10	Max_Diff_CorrelationDetector	3	279	336	34	34	0	0.0368663594470046	0.101190476190476	0.30952380952381	0.140350877192982	0	0	2.77375967393247	10.6493410401019
3	10	Max_Diff_CorrelationDetector	4	411	683	48	48	0	0.00920245398773006	0.0702781844802343	0.194729136163982	0.1	0	0	2.52997743470238	9.25896747891402
3	10	Max_Diff_CorrelationDetector	2	343	355	24	24	0	0.0277777777777778	0.0676056338028169	0.236619718309859	0.166666666666667	0.0606060606060606	0	2.70064137443705	10.8998252448102
3	10	Max_Diff_CorrelationDetector	4	273	378	25	25	0	0.028436018957346	0.0661375661375661	0.19047619047619	0.024390243902439	0.0697674418604651	0	2.4150320642474	8.75667062003668
3	10	Max_Diff_CorrelationDetector	3	466	539	21	21	0	0.0341685649202733	0.038961038961039	0.144712430426716	0.115384615384615	0	0.0247933884297521	2.51172365836055	9.03113683236995
3	10	Max_Diff_CorrelationDetector	3	288	399	35	35	0	0.0265151515151515	0.087719298245614	0.238095238095238	0.101694915254237	0.0217391304347826	0	2.69077496872459	10.5546512691929
3	10	Max_Diff_CorrelationDetector	3	393	427	24	24	0	0.0113636363636364	0.0562060889929742	0.168618266978923	0.0222222222222222	0	0.0116279069767442	2.83299582304424	11.0326066775401
3	10	Max_Diff_CorrelationDetector	2	271	316	26	26	0	0.028735632183908	0.0822784810126582	0.300632911392405	0.0975609756097561	0.037037037037037	0	3.5217584133935	14.4844120908455
3	10	Max_Diff_CorrelationDetector	4	365	395	30	30	0	0.0167224080267559	0.0759493670886076	0.162025316455696	0.102564102564103	0.0178571428571429	0	2.24011329596408	6.90621217983234
3	10	Max_Diff_CorrelationDetector	1	263	274	13	13	0	0.0275862068965517	0.0474452554744526	0.218978102189781	0.0454545454545455	0	0.0151515151515152	1.8195616849957	4.59388014060798
3	10	Max_Diff_CorrelationDetector	2	246	321	18	18	0	0.0151515151515152	0.0560747663551402	0.202492211838006	0.0512820512820513	0.027027027027027	0	1.8599823054079	5.58263217735443
3	10	Max_Diff_CorrelationDetector	6	606	799	96	96	0	0.0357142857142857	0.120150187734668	0.287859824780976	0.242424242424242	0.0185185185185185	0.0185614849187935	4.69604968942616	19.0562685913984
3	10	Max_Diff_CorrelationDetector	2	330	352	49	49	0	0.0803212851405622	0.139204545454545	0.40625	0.0731707317073171	0	0.00854700854700855	4.39450231336952	17.2148564103978
3	10	Max_Diff_CorrelationDetector	5	396	701	42	42	0	0.0196078431372549	0.0599144079885877	0.199714693295292	0.0909090909090909	0	0.0072463768115942	3.40612958317892	13.5998970762865
3	10	Max_Diff_CorrelationDetector	6	634	1058	75	75	0	0.0175718849840256	0.0708884688090737	0.198487712665406	0.1	0.0317460317460317	0.011214953271028	2.53588693500502	10.2421068358093
3	10	Max_Diff_CorrelationDetector	3	384	443	21	21	0	0.00378787878787879	0.0474040632054176	0.250564334085779	0	0	0.00444444444444444	1.92766591320502	6.42573621171624
3	10	Max_Diff_CorrelationDetector	4	623	777	17	17	0	0.0114566284779051	0.0218790218790219	0.0926640926640927	0	0.0967741935483871	0.00189753320683112	2.06526939120456	7.48586319661865
5	10	Max_Diff_CorrelationDetector	3	297	476	49	49	0	0.0203252032520325	0.102941176470588	0.281512605042017	0.0697674418604651	0	0	4.33068409618062	17.6837106540921
5	10	Max_Diff_CorrelationDetector	3	351	390	38	38	0	0.0330882352941176	0.0974358974358974	0.271794871794872	0.037037037037037	0	0.0449438202247191	4.61551065630803	17.4256956659362
5	10	Max_Diff_CorrelationDetector	1	255	206	17	17	0	0.0574712643678161	0.0825242718446602	0.213592233009709	0.151515151515152	0.107142857142857	0	3.49981234450394	13.9094466447582
5	10	Max_Diff_CorrelationDetector	2	268	325	37	37	0	0.0473933649289099	0.113846153846154	0.227692307692308	0.116279069767442	0.0238095238095238	0.0283018867924528	3.9548740634249	15.5289287137772
5	10	Max_Diff_CorrelationDetector	3	268	285	10	10	0	0.004739336492891	0.0350877192982456	0.136842105263158	0	0.0208333333333333	0	3.68682235540477	13.9767219344026
5	10	Max_Diff_CorrelationDetector	3	374	372	12	12	0	0.0137931034482759	0.032258064516129	0.147849462365591	0.0465116279069767	0	0.00869565217391304	4.21038627837389	17.4646173896347
5	10	Max_Diff_CorrelationDetector	4	286	379	56	56	0	0.068	0.147757255936675	0.306068601583113	0.204545454545455	0	0	4.95406979834588	19.2996188456158
5	10	Max_Diff_CorrelationDetector	1	322	382	62	62	0	0.0808510638297872	0.162303664921466	0.371727748691099	0.0588235294117647	0.0869565217391304	0.0764705882352941	5.50257585950212	20.2780930946322
5	10	Max_Diff_CorrelationDetector	3	434	524	40	40	0	0.024330900243309	0.0763358778625954	0.211832061068702	0.0666666666666667	0.0192307692307692	0.019047619047619	6.08497575957875	22.8934167102947
5	10	Max_Diff_CorrelationDetector	2	260	384	65	65	0	0.0704845814977974	0.169270833333333	0.424479166666667	0.142857142857143	0.0344827586206897	0.018348623853211	6.43959854226279	23.3535803408791
5	10	Max_Diff_CorrelationDetector	3	392	429	28	28	0	0.0224358974358974	0.0652680652680653	0.233100233100233	0.125	0.0526315789473684	0	5.25022786012226	20.0339582315205
5	10	Max_Diff_CorrelationDetector	2	314	438	71	71	0	0.0224215246636771	0.162100456621005	0.34703196347032	0.0930232558139535	0	0	5.35597582742223	21.5875717587343
5	10	Max_Diff_CorrelationDetector	2	396	339	19	19	0	0.0269360269360269	0.056047197640118	0.227138643067847	0.111111111111111	0	0.0133333333333333	5.01506013174586	19.7583851214839
5	10	Max_Diff_CorrelationDetector	1	229	220	28	28	0	0.0324675324675325	0.127272727272727	0.318181818181818	0.0961538461538462	0	0	3.56251316019849	13.0590649070323
5	10	Max_Diff_CorrelationDetector	3	361	376	37	37	0	0.0140350877192982	0.0984042553191489	0.210106382978723	0.1	0	0	5.57631149820041	20.8125404833264
5	10	Max_Diff_CorrelationDetector	1	271	423	95	95	0	0.106719367588933	0.224586288416076	0.434988179669031	0.205882352941176	0.0555555555555556	0.0718954248366013	7.13479253047328	25.5400864190647
5	10	Max_Diff_CorrelationDetector	2	197	231	28	28	0	0.0656934306569343	0.121212121212121	0.324675324675325	0.136363636363636	0.0303030303030303	0	4.11291677014793	16.172297664586
5	10	Max_Diff_CorrelationDetector	1	249	298	41	41	0	0.0785340314136126	0.13758389261745	0.338926174496644	0.229166666666667	0.0588235294117647	0.0108695652173913	5.97300308237742	22.4287817939407
5	10	Max_Diff_CorrelationDetector	3	351	432	91	91	0	0.107142857142857	0.210648148148148	0.425925925925926	0.275	0.2	0.0406091370558376	7.98291021046111	27.6508068810277
5	10	Max_Diff_CorrelationDetector	4	432	508	70	70	0	0.0578512396694215	0.137795275590551	0.34251968503937	0.0588235294117647	0.0338983050847458	0.0343347639484979	7.93894434768839	27.7492908890265
5	10	Max_Diff_CorrelationDetector	3	326	410	66	66	0	0.0853658536585366	0.160975609756098	0.365853658536585	0.186046511627907	0.0689655172413793	0.0564971751412429	5.68615565511141	20.0338787681765
5	10	Max_Diff_CorrelationDetector	3	352	527	97	97	0	0.0553745928338762	0.184060721062619	0.388994307400379	0.176470588235294	0.032258064516129	0.0229357798165138	7.1044444102519	23.9407025742516
5	10	Max_Diff_CorrelationDetector	6	370	675	134	134	0	0.112021857923497	0.198518518518519	0.451851851851852	0.3125	0.0422535211267606	0.031413612565445	8.37407973976426	28.5501492033653
5	10	Max_Diff_CorrelationDetector	2	280	445	111	111	0	0.104477611940299	0.249438202247191	0.523595505617978	0.227272727272727	0.125	0.05	7.42528214505035	25.0654227741352
5	10	Max_Diff_CorrelationDetector	2	343	586	83	83	0	0.0701219512195122	0.141638225255973	0.370307167235495	0.133333333333333	0.0444444444444444	0.0449438202247191	7.46625087566675	26.2601345350768
5	10	Max_Diff_CorrelationDetector	3	396	681	104	104	0	0.0473372781065089	0.152716593245228	0.295154185022026	0.225	0	0.0156862745098039	4.78973147266925	18.8006632655087
5	10	Max_Diff_CorrelationDetector	4	346	448	81	81	0	0.105882352941176	0.180803571428571	0.388392857142857	0.0789473684210526	0.032258064516129	0.00757575757575758	5.36477617388913	20.9791094903877
5	10	Max_Diff_CorrelationDetector	1	232	183	64	64	0	0.299212598425197	0.349726775956284	0.502732240437158	0.18	0	0	5.18723296985388	20.4994077235217
5	10	Max_Diff_CorrelationDetector	4	358	450	27	27	0	0.0175438596491228	0.06	0.206666666666667	0.0833333333333333	0.024390243902439	0.00492610837438424	4.01114105914282	14.9934229805198
5	10	Max_Diff_CorrelationDetector	2	232	236	30	30	0	0.0819672131147541	0.127118644067797	0.432203389830508	0.133333333333333	0.0434782608695652	0	4.18575576465967	15.8895770968123
5	10	Max_Diff_CorrelationDetector	4	465	496	26	26	0	0.0122249388753056	0.0524193548387097	0.137096774193548	0.0526315789473684	0.0294117647058824	0.00645161290322581	3.80024905604113	13.5319706304238
5	10	Max_Diff_CorrelationDetector	1	359	336	45	45	0	0.0448979591836735	0.133928571428571	0.24702380952381	0.121212121212121	0	0.0218579234972678	4.57557212321901	17.8789248301829
5	10	Max_Diff_CorrelationDetector	1	278	265	36	36	0	0.0541871921182266	0.135849056603774	0.40377358490566	0.12	0.0689655172413793	0.0126582278481013	5.44363313635982	21.8850670294355
5	10	Max_Diff_CorrelationDetector	6	372	444	31	31	0	0.0262390670553936	0.0698198198198198	0.236486486486486	0.134615384615385	0	0.00401606425702811	4.5247958140953	16.6573168304845
5	10	Max_Diff_CorrelationDetector	1	364	323	60	60	0	0.134387351778656	0.185758513931889	0.371517027863777	0.105263157894737	0.0526315789473684	0.0473372781065089	5.37174547766349	20.2537375261686
5	10	Max_Diff_CorrelationDetector	1	239	272	66	66	0	0.122699386503067	0.242647058823529	0.525735294117647	0.3125	0	0	4.80600325677006	18.5500119589767
5	10	Max_Diff_CorrelationDetector	3	282	276	33	33	0	0.0465116279069767	0.119565217391304	0.322463768115942	0.0540540540540541	0.0384615384615385	0.00819672131147541	5.83374632089984	21.8967141471119
5	10	Max_Diff_CorrelationDetector	3	361	499	56	56	0	0.0606936416184971	0.112224448897796	0.292585170340681	0.142857142857143	0.111111111111111	0.0386473429951691	5.15240073394267	19.4609738159431
5	10	Max_Diff_CorrelationDetector	2	307	485	57	57	0	0.0602006688963211	0.117525773195876	0.315463917525773	0.244444444444444	0.0508474576271186	0.0118343195266272	5.62101595832841	20.7167021618964
5	10	Max_Diff_CorrelationDetector	3	395	460	33	33	0	0.0212201591511936	0.0717391304347826	0.289130434782609	0.0491803278688525	0	0.0116731517509728	5.24274675574147	20.2718705854122
5	10	Max_Diff_CorrelationDetector	4	354	564	64	64	0	0.0193548387096774	0.113475177304965	0.347517730496454	0.0714285714285714	0	0.0142857142857143	5.31138100649028	19.7671171954111
5	10	Max_Diff_CorrelationDetector	2	249	202	44	44	0	0.127659574468085	0.217821782178218	0.435643564356436	0.2	0.16	0.0384615384615385	4.36240797025009	15.9757723022315
5	10	Max_Diff_CorrelationDetector	2	231	257	50	50	0	0.104938271604938	0.194552529182879	0.346303501945525	0.25	0.0487804878048781	0	4.91986084716848	19.2443948803675
5	10	Max_Diff_CorrelationDetector	4	423	651	95	95	0	0.0359281437125748	0.145929339477727	0.328725038402458	0.304347826086957	0.0232558139534884	0.0155642023346304	4.2159807937998	16.0021065765535
5	10	Max_Diff_CorrelationDetector	4	543	781	43	43	0	0.0148423005565863	0.0550576184379001	0.167733674775928	0.0714285714285714	0	0.0087719298245614	4.4614402908144	16.6895473306377
5	10	Max_Diff_CorrelationDetector	1	304	299	27	27	0	0.0348258706467662	0.0903010033444816	0.260869565217391	0.152173913043478	0	0	4.53736997659356	16.9608757403054
5	10	Max_Diff_CorrelationDetector	5	254	324	46	46	0	0.0686274509803922	0.141975308641975	0.327160493827161	0.134615384615385	0.0512820512820513	0.0350877192982456	5.22950485507313	18.9251401325552
5	10	Max_Diff_CorrelationDetector	2	301	395	62	62	0	0.072463768115942	0.156962025316456	0.308860759493671	0.1875	0	0.04375	6.01729395562058	22.3521198574742
5	10	Max_Diff_CorrelationDetector	5	569	951	33	33	0	0.0285714285714286	0.0347003154574132	0.168243953732913	0.0789473684210526	0	0.0263157894736842	4.60966490167414	16.961929722726
5	10	Max_Diff_CorrelationDetector	4	319	360	46	46	0	0.0328467153284672	0.127777777777778	0.266666666666667	0.0416666666666667	0.0606060606060606	0.0217391304347826	4.98371860961151	18.6815817994488
5	10	Max_Diff_CorrelationDetector	3	361	386	25	25	0	0.0318471337579618	0.0647668393782383	0.178756476683938	0.103448275862069	0.0263157894736842	0.0245098039215686	3.09309136287926	12.4889649590301
5	10	Max_Diff_CorrelationDetector	2	327	628	139	139	0	0.122302158273381	0.221337579617834	0.396496815286624	0.176470588235294	0	0.0246913580246914	6.58088736200802	24.7049244915913
5	10	Max_Diff_CorrelationDetector	3	224	486	117	117	0	0.108247422680412	0.240740740740741	0.432098765432099	0.142857142857143	0.0588235294117647	0.0405405405405405	6.01159896293312	22.9475720320008
5	10	Max_Diff_CorrelationDetector	5	321	301	22	22	0	0.0336538461538462	0.0730897009966777	0.235880398671096	0.0714285714285714	0	0.037037037037037	5.12524413150756	19.8700722593159
5	10	Max_Diff_CorrelationDetector	1	255	289	27	27	0	0.0292397660818713	0.0934256055363322	0.259515570934256	0.0862068965517241	0	0	3.90486131550646	15.7360018993748
5	10	Max_Diff_CorrelationDetector	2	431	608	56	56	0	0.0213270142180095	0.0921052631578947	0.245065789473684	0	0	0.0287539936102236	6.16430539621409	23.4800344543284
5	10	Max_Diff_CorrelationDetector	2	383	539	103	103	0	0.0776119402985075	0.191094619666048	0.432282003710575	0.341463414634146	0.0476190476190476	0.0429184549356223	7.55096401758847	27.0326097709296
5	10	Max_Diff_CorrelationDetector	1	309	511	157	157	0	0.164983164983165	0.307240704500978	0.555772994129158	0.327586206896552	0.0967741935483871	0.0975609756097561	7.9625183687931	29.3039323269677
5	10	Max_Diff_CorrelationDetector	2	231	328	93	93	0	0.147727272727273	0.283536585365854	0.579268292682927	0.25	0.138888888888889	0.0652173913043478	7.16593631668021	24.9825109978877
5	10	Max_Diff_CorrelationDetector	2	295	379	86	86	0	0.122362869198312	0.226912928759894	0.437994722955145	0.08	0	0.00884955752212389	6.81305139582448	24.3362208854934
7	10	Max_Diff_CorrelationDetector	1	266	443	118	118	0	0.104803493449782	0.266365688487585	0.485327313769752	0.241379310344828	0.166666666666667	0.0285714285714286	9.5483863898804	29.1382323213208
7	10	Max_Diff_CorrelationDetector	0	196	135	20	20	0	0.0333333333333333	0.148148148148148	0.414814814814815	0.0434782608695652	0	0.037037037037037	7.29384838767362	25.6660808973295
7	10	Max_Diff_CorrelationDetector	0	221	337	101	101	0	0.138157894736842	0.299703264094956	0.516320474777448	0.287878787878788	0	0	9.10713058349014	29.1594672444409
7	10	Max_Diff_CorrelationDetector	1	200	116	46	46	0	0.231707317073171	0.396551724137931	0.663793103448276	0.263157894736842	0	0	6.69715174350603	25.1304841788672
7	10	Max_Diff_CorrelationDetector	2	376	435	45	45	0	0.0122324159021407	0.103448275862069	0.23448275862069	0.027027027027027	0	0	7.25532475678211	25.9927785653198
7	10	Max_Diff_CorrelationDetector	5	313	422	93	93	0	0.0603448275862069	0.220379146919431	0.469194312796209	0.121951219512195	0.0769230769230769	0.0194805194805195	10.5599430658054	33.4312266071985
7	10	Max_Diff_CorrelationDetector	3	265	236	60	60	0	0.130434782608696	0.254237288135593	0.427966101694915	0.326923076923077	0	0.0240963855421687	8.29958541781913	27.6130423802254
7	10	Max_Diff_CorrelationDetector	4	436	415	40	40	0	0.0150602409638554	0.0963855421686747	0.255421686746988	0.107142857142857	0	0.00760456273764259	5.29138854137752	18.8741365074301
7	10	Max_Diff_CorrelationDetector	2	335	378	43	43	0	0.0575539568345324	0.113756613756614	0.306878306878307	0.138888888888889	0.0416666666666667	0.0232558139534884	4.82713693872939	17.120319181086
7	10	Max_Diff_CorrelationDetector	2	272	254	46	46	0	0.0782122905027933	0.181102362204724	0.350393700787402	0.261904761904762	0.027027027027027	0.0102040816326531	6.131277394797	21.627293490982
7	10	Max_Diff_CorrelationDetector	3	425	572	60	60	0	0.0503978779840849	0.104895104895105	0.309440559440559	0.0666666666666667	0.0188679245283019	0.0507246376811594	5.48176951646197	19.7463647257837
7	10	Max_Diff_CorrelationDetector	2	214	300	71	71	0	0.104651162790698	0.236666666666667	0.436666666666667	0.261904761904762	0.0277777777777778	0	5.10127227774042	18.3015098560737
7	10	Max_Diff_CorrelationDetector	1	254	360	78	78	0	0.1	0.216666666666667	0.494444444444444	0.28	0.0208333333333333	0.0560747663551402	6.19846707938061	22.3593433644049
7	10	Max_Diff_CorrelationDetector	3	360	306	24	24	0	0.0538461538461538	0.0784313725490196	0.222222222222222	0.0833333333333333	0	0.055	6.54057589497622	22.784596971033
7	10	Max_Diff_CorrelationDetector	3	262	376	104	104	0	0.111111111111111	0.276595744680851	0.412234042553192	0.278688524590164	0.08	0.0223880597014925	7.3738833508214	24.3042963584935
7	10	Max_Diff_CorrelationDetector	1	203	189	51	51	0	0.10655737704918	0.26984126984127	0.566137566137566	0.164179104477612	0	0.032258064516129	7.38609253277153	26.3471638461767
7	10	Max_Diff_CorrelationDetector	3	295	385	64	64	0	0.0775862068965517	0.166233766233766	0.38961038961039	0.169811320754717	0.105263157894737	0.0381679389312977	8.65953414731724	27.3063660023422
7	10	Max_Diff_CorrelationDetector	4	348	347	60	60	0	0.06	0.172910662824208	0.293948126801153	0.21875	0	0.0217391304347826	5.82241091733233	19.7691166190781
7	10	Max_Diff_CorrelationDetector	1	211	205	80	80	0	0.223076923076923	0.390243902439024	0.560975609756098	0.357142857142857	0	0.121212121212121	7.26318697599631	25.3967661006345
7	10	Max_Diff_CorrelationDetector	1	273	259	38	38	0	0.0673575129533679	0.146718146718147	0.308880308880309	0.0681818181818182	0.103448275862069	0.0467289719626168	7.08252315507983	25.2413359565073
7	10	Max_Diff_CorrelationDetector	2	365	441	51	51	0	0.0350877192982456	0.115646258503401	0.272108843537415	0.157894736842105	0	0	8.81968999557409	26.9873347488693
7	10	Max_Diff_CorrelationDetector	2	231	268	81	81	0	0.137931034482759	0.302238805970149	0.511194029850746	0.224137931034483	0.2	0.0476190476190476	7.94246078908481	27.4186682049553
7	10	Max_Diff_CorrelationDetector	3	276	250	27	27	0	0.0833333333333333	0.108	0.3	0.173913043478261	0.0454545454545455	0.0437956204379562	6.80131305975201	24.2135016599371
7	10	Max_Diff_CorrelationDetector	2	241	225	46	46	0	0.121212121212121	0.204444444444444	0.36	0.125	0.125	0.0327868852459016	7.14596594693741	26.3663819185214
7	10	Max_Diff_CorrelationDetector	2	297	365	54	54	0	0.0729613733905579	0.147945205479452	0.331506849315069	0.233333333333333	0	0.00598802395209581	8.10150406064408	26.8984487226512
7	10	Max_Diff_CorrelationDetector	2	302	311	66	66	0	0.0732984293193717	0.212218649517685	0.356913183279743	0.222222222222222	0	0	6.81320943950497	22.8913158275109
7	10	Max_Diff_CorrelationDetector	2	284	336	58	58	0	0.0588235294117647	0.172619047619048	0.443452380952381	0.0754716981132075	0.0454545454545455	0.0518518518518519	9.21919800073843	30.0030181381802
7	10	Max_Diff_CorrelationDetector	1	282	276	37	37	0	0.0588235294117647	0.134057971014493	0.365942028985507	0.0425531914893617	0.0666666666666667	0.0601503759398496	7.81549979194821	27.232990830919
7	10	Max_Diff_CorrelationDetector	0	271	269	70	70	0	0.0691823899371069	0.260223048327138	0.397769516728625	0.209302325581395	0	0.0196078431372549	5.76421775194156	19.5962105731163
7	10	Max_Diff_CorrelationDetector	1	324	448	134	134	0	0.158914728682171	0.299107142857143	0.542410714285714	0.270833333333333	0.105263157894737	0.0144927536231884	8.14182762310728	26.5517672007056
7	10	Max_Diff_CorrelationDetector	5	530	1032	252	252	0	0.142314990512334	0.244186046511628	0.498062015503876	0.358974358974359	0.111111111111111	0.0846994535519126	9.61720230307416	29.2264488784102
7	10	Max_Diff_CorrelationDetector	2	261	281	53	53	0	0.0756756756756757	0.188612099644128	0.423487544483986	0.142857142857143	0.05	0.0442477876106195	6.78181464441178	23.1533712245181
7	10	Max_Diff_CorrelationDetector	1	238	367	109	109	0	0.128	0.29700272479564	0.596730245231608	0.210526315789474	0.0714285714285714	0.0363636363636364	7.10080213860131	24.0407434259415
7	10	Max_Diff_CorrelationDetector	2	261	236	48	48	0	0.0993377483443709	0.203389830508475	0.457627118644068	0.294117647058824	0.0512820512820513	0	6.10591447992232	20.4088817191114
7	10	Max_Diff_CorrelationDetector	4	443	639	127	127	0	0.12565445026178	0.198748043818466	0.535211267605634	0.387096774193548	0.145833333333333	0.0853242320819113	9.59350577292209	28.7559633432348
7	10	Max_Diff_CorrelationDetector	3	278	300	55	55	0	0.0921658986175115	0.183333333333333	0.35	0.276595744680851	0.0476190476190476	0	6.31091458145575	22.6441752235061
7	10	Max_Diff_CorrelationDetector	5	336	704	145	145	0	0.0930930930930931	0.205965909090909	0.430397727272727	0.28	0.08	0.0336538461538462	8.669432780554	26.1152753618827
7	10	Max_Diff_CorrelationDetector	2	232	270	47	47	0	0.077720207253886	0.174074074074074	0.337037037037037	0.172413793103448	0.037037037037037	0	6.78633159734667	23.1501732471201
7	10	Max_Diff_CorrelationDetector	0	219	330	149	149	0	0.313609467455621	0.451515151515152	0.7	0.425925925925926	0.22	0.166666666666667	9.59112433692178	29.6063695502699
7	10	Max_Diff_CorrelationDetector	5	404	428	38	38	0	0.0603448275862069	0.088785046728972	0.301401869158879	0.135135135135135	0.0377358490566038	0.0423728813559322	9.01024504931109	30.2474775910113
7	10	Max_Diff_CorrelationDetector	2	219	264	54	54	0	0.0971428571428571	0.204545454545455	0.534090909090909	0.114754098360656	0.0816326530612245	0.0416666666666667	9.42107648266381	27.614961685485
7	10	Max_Diff_CorrelationDetector	1	237	232	72	72	0	0.0697674418604651	0.310344827586207	0.633620689655172	0.102040816326531	0	0.0208333333333333	8.70933250474994	28.8960463773876
7	10	Max_Diff_CorrelationDetector	2	327	553	166	166	0	0.113475177304965	0.300180831826401	0.535262206148282	0.263157894736842	0.169811320754717	0.0344827586206897	8.29869550344145	26.0003898802445
7	10	Max_Diff_CorrelationDetector	3	385	436	99	99	0	0.112540192926045	0.227064220183486	0.481651376146789	0.25531914893617	0	0.0909090909090909	9.26506587323697	28.8758208619821
7	10	Max_Diff_CorrelationDetector	3	336	344	81	81	0	0.125560538116592	0.23546511627907	0.511627906976744	0.176470588235294	0	0.115151515151515	7.49055279963936	22.7009431745421
7	10	Max_Diff_CorrelationDetector	2	247	435	132	132	0	0.0966183574879227	0.303448275862069	0.55632183908046	0.214285714285714	0.0344827586206897	0.037037037037037	10.5480657128612	31.5569285945463
7	10	Max_Diff_CorrelationDetector	2	286	423	84	84	0	0.0627615062761506	0.198581560283688	0.482269503546099	0.111111111111111	0.0769230769230769	0.00719424460431655	9.3350392542933	29.1807845820151
7	10	Max_Diff_CorrelationDetector	1	323	575	151	151	0	0.119298245614035	0.262608695652174	0.528695652173913	0.370967741935484	0.0476190476190476	0.0181818181818182	10.5366645869956	30.3238347386312
7	10	Max_Diff_CorrelationDetector	2	299	374	69	69	0	0.112676056338028	0.184491978609626	0.398395721925134	0.0714285714285714	0.2	0.05	9.08444839136581	28.067938160086
7	10	Max_Diff_CorrelationDetector	1	243	339	110	110	0	0.137142857142857	0.324483775811209	0.651917404129793	0.204081632653061	0.166666666666667	0	7.91831222534414	26.3584123309513
7	10	Max_Diff_CorrelationDetector	5	434	603	121	121	0	0.0852713178294574	0.200663349917081	0.444444444444444	0.205128205128205	0.0810810810810811	0.0585774058577406	8.87312556591682	29.2136910215068
7	10	Max_Diff_CorrelationDetector	1	211	216	26	26	0	0.0769230769230769	0.12037037037037	0.365740740740741	0.163265306122449	0	0	6.24297062905903	22.0999111402721
7	10	Max_Diff_CorrelationDetector	1	245	210	37	37	0	0.0597014925373134	0.176190476190476	0.461904761904762	0.195121951219512	0	0	6.24540342026008	21.6590226740414
7	10	Max_Diff_CorrelationDetector	4	294	262	32	32	0	0.0707547169811321	0.122137404580153	0.278625954198473	0.294117647058824	0	0	6.79013719597179	23.7960988103575
7	10	Max_Diff_CorrelationDetector	3	412	605	77	77	0	0.0394366197183099	0.127272727272727	0.353719008264463	0.0681818181818182	0.0526315789473684	0.0319148936170213	7.47421419738135	24.4138311641314
7	10	Max_Diff_CorrelationDetector	5	288	350	28	28	0	0.0217391304347826	0.08	0.36	0.0277777777777778	0.0625	0	6.8252490755929	22.9270852699268
7	10	Max_Diff_CorrelationDetector	2	367	476	71	71	0	0.0415335463258786	0.149159663865546	0.357142857142857	0.243243243243243	0.0444444444444444	0.00917431192660551	6.82469822039419	23.0917219518664
7	10	Max_Diff_CorrelationDetector	1	211	229	78	78	0	0.238532110091743	0.34061135371179	0.563318777292576	0.30188679245283	0	0.0416666666666667	7.27171787913329	23.7800318765741
7	10	Max_Diff_CorrelationDetector	4	309	535	139	139	0	0.10801393728223	0.25981308411215	0.493457943925234	0.311111111111111	0.0731707317073171	0.0126582278481013	8.32461265028052	26.6931057348381
7	10	Max_Diff_CorrelationDetector	1	324	362	85	85	0	0.0967741935483871	0.234806629834254	0.397790055248619	0.170731707317073	0.0238095238095238	0.00694444444444444	7.37460191404659	24.8507283088339
7	10	Max_Diff_CorrelationDetector	4	477	680	129	129	0	0.0894854586129754	0.189705882352941	0.352941176470588	0.195652173913043	0.0294117647058824	0.0497076023391813	7.60927352414628	25.4237796647303
7	10	Max_Diff_CorrelationDetector	1	280	205	27	27	0	0.0718562874251497	0.131707317073171	0.346341463414634	0.222222222222222	0	0.00862068965517241	6.18260484325558	21.7928709549208
7	10	Max_Diff_CorrelationDetector	3	347	450	93	93	0	0.067524115755627	0.206666666666667	0.522222222222222	0.216216216216216	0.0185185185185185	0.0358974358974359	7.98104645697987	25.4374548763003
10	10	Max_Diff_CorrelationDetector	2	349	343	48	48	0	0.036231884057971	0.139941690962099	0.288629737609329	0.111111111111111	0.025	0.00568181818181818	9.16476584519388	26.2090824040972
10	10	Max_Diff_CorrelationDetector	5	335	467	148	148	0	0.138888888888889	0.316916488222698	0.640256959314775	0.490196078431373	0.1	0.0559006211180124	12.9218818740972	34.4326232096257
10	10	Max_Diff_CorrelationDetector	4	262	316	128	128	0	0.185393258426966	0.405063291139241	0.642405063291139	0.478260869565217	0.142857142857143	0.0294117647058824	11.3673247278968	30.4807100130336
10	10	Max_Diff_CorrelationDetector	3	274	267	73	73	0	0.0923913043478261	0.273408239700375	0.573033707865168	0.137254901960784	0.111111111111111	0.0660377358490566	11.3521399224026	31.1188094733042
10	10	Max_Diff_CorrelationDetector	2	354	476	122	122	0	0.150769230769231	0.256302521008403	0.453781512605042	0.396551724137931	0.0333333333333333	0.104166666666667	11.777636571436	32.0259987789365
10	10	Max_Diff_CorrelationDetector	2	353	634	120	120	0	0.0844594594594595	0.189274447949527	0.495268138801262	0.22	0.185185185185185	0.0233644859813084	10.7366622064022	29.871405373432
10	10	Max_Diff_CorrelationDetector	2	310	415	113	113	0	0.0983606557377049	0.272289156626506	0.539759036144578	0.228070175438596	0.0625	0.0416666666666667	11.4401125433827	31.0959561559173
10	10	Max_Diff_CorrelationDetector	1	228	287	79	79	0	0.154362416107383	0.275261324041812	0.602787456445993	0.32	0.0833333333333333	0.0158730158730159	10.5654654623611	29.8074511900922
10	10	Max_Diff_CorrelationDetector	0	238	205	64	64	0	0.195652173913043	0.31219512195122	0.697560975609756	0.30952380952381	0.08	0	10.351801406988	29.7984131281605
10	10	Max_Diff_CorrelationDetector	1	204	173	34	34	0	0.124031007751938	0.196531791907514	0.456647398843931	0.25	0	0	9.63193556999842	27.3864210674489
10	10	Max_Diff_CorrelationDetector	1	228	279	115	115	0	0.167701863354037	0.412186379928315	0.666666666666667	0.163636363636364	0.0909090909090909	0.142857142857143	10.6502486287435	30.0689289384267
10	10	Max_Diff_CorrelationDetector	2	340	458	106	106	0	0.0598591549295775	0.231441048034935	0.454148471615721	0.24	0	0.00561797752808989	9.71029789858533	28.0027239578673
10	10	Max_Diff_CorrelationDetector	1	172	160	42	42	0	0.152173913043478	0.2625	0.625	0.172413793103448	0	0	8.2383158808008	25.2426950082609
10	10	Max_Diff_CorrelationDetector	3	497	746	156	156	0	0.0548523206751055	0.20911528150134	0.418230563002681	0.380952380952381	0	0.0205128205128205	12.0464201984514	32.5203927842406
10	10	Max_Diff_CorrelationDetector	3	537	841	147	147	0	0.0513918629550321	0.174791914387634	0.453032104637337	0.176470588235294	0.107142857142857	0.0302267002518892	10.3645480803052	29.5200272361161
10	10	Max_Diff_CorrelationDetector	3	401	537	111	111	0	0.08	0.206703910614525	0.463687150837989	0.232558139534884	0.0208333333333333	0.064	11.1156828027293	29.0360066813499
10	10	Max_Diff_CorrelationDetector	1	233	225	69	69	0	0.159090909090909	0.306666666666667	0.68	0.204081632653061	0.0588235294117647	0.133333333333333	10.3318531101582	29.5791043127007
10	10	Max_Diff_CorrelationDetector	3	522	785	215	215	0	0.0587002096436059	0.273885350318471	0.466242038216561	0.432432432432432	0.0769230769230769	0.0137741046831956	11.4196662824817	30.9645689600263
10	10	Max_Diff_CorrelationDetector	3	256	320	58	58	0	0.107476635514019	0.18125	0.5	0.151515151515152	0.155844155844156	0.043956043956044	8.91784875724882	25.0663875075732
10	10	Max_Diff_CorrelationDetector	0	227	217	54	54	0	0.124087591240876	0.248847926267281	0.497695852534562	0.214285714285714	0.146341463414634	0.0222222222222222	9.55387229835087	28.6450598735246
10	10	Max_Diff_CorrelationDetector	1	250	277	55	55	0	0.0886699507389163	0.1985559566787	0.389891696750903	0.175675675675676	0	0.0225563909774436	9.08896683829398	27.3996079555998
10	10	Max_Diff_CorrelationDetector	1	205	414	144	144	0	0.13125	0.347826086956522	0.603864734299517	0.25	0.037037037037037	0.0379746835443038	11.5826673274353	31.2679603328305
10	10	Max_Diff_CorrelationDetector	0	174	45	17	17	0	0.176470588235294	0.377777777777778	0.711111111111111	0.0714285714285714	0	NaN	7.19294354773461	23.3696520968406
10	10	Max_Diff_CorrelationDetector	2	256	386	130	130	0	0.0736842105263158	0.336787564766839	0.632124352331606	0.206896551724138	0	0	11.1443583541774	30.4021759416849
10	10	Max_Diff_CorrelationDetector	1	328	286	66	66	0	0.116751269035533	0.230769230769231	0.555944055944056	0.125	0.193548387096774	0.0672268907563025	10.7490922337019	30.7688552039807
10	10	Max_Diff_CorrelationDetector	2	203	148	58	58	0	0.174603174603175	0.391891891891892	0.675675675675676	0.222222222222222	0	0	8.96505409029785	27.9518585963336
10	10	Max_Diff_CorrelationDetector	1	317	396	102	102	0	0.0535714285714286	0.257575757575758	0.578282828282828	0.184210526315789	0	0.0289855072463768	12.1951185197342	31.9835010403385
10	10	Max_Diff_CorrelationDetector	2	284	219	70	70	0	0.125984251968504	0.319634703196347	0.575342465753425	0.304347826086957	0.142857142857143	0.0384615384615385	10.6864563197436	29.4220473616108
10	10	Max_Diff_CorrelationDetector	2	436	708	214	214	0	0.184143222506394	0.30225988700565	0.604519774011299	0.266666666666667	0.137931034482759	0.102661596958175	12.9041933778233	34.7191870271753
10	10	Max_Diff_CorrelationDetector	1	264	393	122	122	0	0.187214611872146	0.310432569974555	0.636132315521629	0.239130434782609	0.0625	0.0833333333333333	11.0519855459016	30.5486820025345
10	10	Max_Diff_CorrelationDetector	3	371	515	118	118	0	0.0672514619883041	0.229126213592233	0.500970873786408	0.173913043478261	0.0204081632653061	0.014018691588785	10.7619411742715	29.3785962013987
10	10	Max_Diff_CorrelationDetector	3	259	559	213	213	0	0.175965665236052	0.381037567084079	0.658318425760286	0.415094339622642	0.166666666666667	0	12.9107598081766	33.2358736945418
10	10	Max_Diff_CorrelationDetector	1	200	205	65	65	0	0.2	0.317073170731707	0.590243902439024	0.1875	0.192307692307692	0.0697674418604651	10.3174048489158	30.7399765060382
10	10	Max_Diff_CorrelationDetector	4	286	531	209	209	0	0.232931726907631	0.393596986817326	0.632768361581921	0.46875	0.037037037037037	0.0444444444444444	12.7573484381664	33.7996884748378
10	10	Max_Diff_CorrelationDetector	1	198	253	89	89	0	0.0975609756097561	0.351778656126482	0.565217391304348	0.2	0	0	11.0846781112257	30.4689347057693
10	10	Max_Diff_CorrelationDetector	2	272	245	61	61	0	0.0838323353293413	0.248979591836735	0.404081632653061	0.255813953488372	0	0	10.101603616062	29.561324708975
10	10	Max_Diff_CorrelationDetector	3	361	492	147	147	0	0.13135593220339	0.298780487804878	0.554878048780488	0.225806451612903	0.107142857142857	0.109289617486339	10.2818985569717	28.7828531764907
10	10	Max_Diff_CorrelationDetector	2	322	346	74	74	0	0.0859375	0.213872832369942	0.410404624277457	0.347826086956522	0.0277777777777778	0.0236686390532544	11.4490095181105	32.0140480177039
10	10	Max_Diff_CorrelationDetector	4	390	763	194	194	0	0.0981912144702842	0.254259501965924	0.560943643512451	0.14	0.0869565217391304	0.0794392523364486	12.7850352891905	31.7817366537756
10	10	Max_Diff_CorrelationDetector	2	285	395	121	121	0	0.115384615384615	0.306329113924051	0.635443037974683	0.333333333333333	0.0625	0	12.3344753364983	33.8448573343807
10	10	Max_Diff_CorrelationDetector	3	384	743	143	143	0	0.0448548812664908	0.192462987886945	0.437415881561238	0.25	0.0526315789473684	0	10.5032559868642	27.4037124167685
10	10	Max_Diff_CorrelationDetector	4	398	650	163	163	0	0.116710875331565	0.250769230769231	0.561538461538462	0.285714285714286	0.156862745098039	0.0600858369098712	11.6889712723239	29.9397516106315
10	10	Max_Diff_CorrelationDetector	1	197	176	98	98	0	0.382716049382716	0.556818181818182	0.761363636363636	0.428571428571429	0	0.171428571428571	9.03776133886196	26.4780007000212
10	10	Max_Diff_CorrelationDetector	3	393	439	65	65	0	0.0577507598784195	0.148063781321185	0.353075170842825	0.1	0	0.0326530612244898	11.5040656100292	30.885380004053
10	10	Max_Diff_CorrelationDetector	2	279	356	44	44	0	0.0876494023904383	0.123595505617978	0.446629213483146	0.101449275362319	0.0526315789473684	0.0440251572327044	9.2657793412313	25.5051053502843
10	10	Max_Diff_CorrelationDetector	1	172	178	85	85	0	0.308411214953271	0.47752808988764	0.780898876404494	0.343283582089552	0.333333333333333	0.0357142857142857	10.2740566498306	28.469948497429
10	10	Max_Diff_CorrelationDetector	6	314	446	68	68	0	0.0733590733590734	0.152466367713004	0.360986547085202	0.3	0.0285714285714286	0.0176470588235294	9.54391147693997	26.7605848823024
10	10	Max_Diff_CorrelationDetector	4	596	873	144	144	0	0.0476190476190476	0.164948453608247	0.402061855670103	0.25	0.0196078431372549	0.0350877192982456	12.1209118688528	31.2825386735714
10	10	Max_Diff_CorrelationDetector	2	236	212	78	78	0	0.142857142857143	0.367924528301887	0.745283018867924	0.25531914893617	0.0952380952380952	0	10.8159520465149	29.9185644118448
10	10	Max_Diff_CorrelationDetector	0	230	89	44	44	0	0.290909090909091	0.49438202247191	0.741573033707865	0.297872340425532	0	0.0769230769230769	9.79755621807839	28.7394896081153
10	10	Max_Diff_CorrelationDetector	4	280	359	99	99	0	0.0828025477707006	0.275766016713092	0.504178272980501	0.289473684210526	0.0588235294117647	0	9.96688674886031	29.2996867465353
10	10	Max_Diff_CorrelationDetector	2	329	342	75	75	0	0.0772532188841202	0.219298245614035	0.45906432748538	0.229166666666667	0.142857142857143	0.0116279069767442	10.0051284095314	28.3115318588898
10	10	Max_Diff_CorrelationDetector	3	303	439	103	103	0	0.0987124463519313	0.234624145785877	0.492027334851936	0.166666666666667	0.229508196721311	0.00740740740740741	10.4774755730229	28.604375877912
10	10	Max_Diff_CorrelationDetector	1	195	356	139	139	0	0.208860759493671	0.390449438202247	0.679775280898876	0.402985074626866	0.136363636363636	0.0153846153846154	10.2866126275446	29.8859511990395
10	10	Max_Diff_CorrelationDetector	1	298	290	79	79	0	0.0954773869346734	0.272413793103448	0.517241379310345	0.222222222222222	0.0909090909090909	0.0317460317460317	10.2194987028279	29.0863031911407
10	10	Max_Diff_CorrelationDetector	3	329	393	127	127	0	0.142857142857143	0.323155216284987	0.600508905852417	0.3125	0.111111111111111	0.0833333333333333	12.3304093525889	33.9227236266343
10	10	Max_Diff_CorrelationDetector	4	355	536	125	125	0	0.0726643598615917	0.233208955223881	0.60634328358209	0.128205128205128	0.117647058823529	0.0314465408805031	11.3006135733611	30.2077508565624
10	10	Max_Diff_CorrelationDetector	1	277	386	134	134	0	0.15311004784689	0.347150259067358	0.626943005181347	0.351851851851852	0.2	0.036231884057971	10.3245247139767	27.9328562212552
10	10	Max_Diff_CorrelationDetector	2	252	409	135	135	0	0.126637554585153	0.330073349633252	0.623471882640587	0.148148148148148	0.196428571428571	0.0135135135135135	13.4725766228428	34.7782197350471
10	10	Max_Diff_CorrelationDetector	3	432	735	153	153	0	0.0616621983914209	0.208163265306122	0.530612244897959	0.32	0.0967741935483871	0.0178571428571429	10.8490303707065	29.366358588728
20	10	Max_Diff_CorrelationDetector	1	245	225	82	82	0	0.126666666666667	0.364444444444444	0.573333333333333	0.244444444444444	0.0666666666666667	0.0289855072463768	14.1590389983718	29.6004059289732
20	10	Max_Diff_CorrelationDetector	2	218	302	147	147	0	0.3	0.486754966887417	0.758278145695364	0.487179487179487	0.232558139534884	0.0869565217391304	16.7794547011575	34.3157342393622
20	10	Max_Diff_CorrelationDetector	0	172	133	93	93	0	0.393939393939394	0.699248120300752	0.87218045112782	0.410714285714286	0	0	15.0888233745983	31.9270429453731
20	10	Max_Diff_CorrelationDetector	2	370	322	87	87	0	0.125490196078431	0.270186335403727	0.43167701863354	0.5625	0	0.0604395604395604	15.1931525248171	32.2209121206735
20	10	Max_Diff_CorrelationDetector	1	182	339	195	195	0	0.372549019607843	0.575221238938053	0.772861356932153	0.575757575757576	0.185185185185185	0.166666666666667	18.0959072794804	37.2658149752658
20	10	Max_Diff_CorrelationDetector	0	192	103	45	45	0	0.142857142857143	0.436893203883495	0.699029126213592	0.24390243902439	0	NaN	13.6197386180175	30.7716006142561
20	10	Max_Diff_CorrelationDetector	1	201	195	117	117	0	0.321100917431193	0.6	0.748717948717949	0.458333333333333	0.238095238095238	0.0882352941176471	16.1467752126993	35.2126940716843
20	10	Max_Diff_CorrelationDetector	1	310	324	114	114	0	0.121951219512195	0.351851851851852	0.62962962962963	0.25	0.196078431372549	0.0740740740740741	16.4675405564946	34.2502204509324
20	10	Max_Diff_CorrelationDetector	0	201	287	153	153	0	0.313432835820896	0.533101045296167	0.763066202090592	0.317073170731707	0.227272727272727	0.3	17.3682544496522	34.3089763083356
20	10	Max_Diff_CorrelationDetector	1	251	247	105	105	0	0.203389830508475	0.425101214574899	0.635627530364372	0.469387755102041	0.0555555555555556	0.0697674418604651	16.7324612374123	35.7990531433741
20	10	Max_Diff_CorrelationDetector	2	260	344	132	132	0	0.226415094339623	0.383720930232558	0.651162790697674	0.490196078431373	0.272727272727273	0.079646017699115	17.4833813670405	35.9767482219655
20	10	Max_Diff_CorrelationDetector	1	192	281	179	179	0	0.425531914893617	0.637010676156584	0.807829181494662	0.695652173913043	0.153846153846154	0.134615384615385	18.3661143035433	36.9016142853656
20	10	Max_Diff_CorrelationDetector	2	191	269	129	129	0	0.311688311688312	0.479553903345725	0.743494423791822	0.540983606557377	0.292682926829268	0	16.385861275175	33.0750631291244
20	10	Max_Diff_CorrelationDetector	2	244	311	125	125	0	0.176470588235294	0.401929260450161	0.665594855305466	0.444444444444444	0.12	0.025974025974026	15.93946491437	33.9582779932982
20	10	Max_Diff_CorrelationDetector	2	298	271	99	99	0	0.228699551569507	0.365313653136531	0.575645756457565	0.568181818181818	0.25	0.0797101449275362	16.4586283710576	34.3251469829604
20	10	Max_Diff_CorrelationDetector	0	184	205	115	115	0	0.368852459016393	0.560975609756098	0.804878048780488	0.46	0.16	0.307692307692308	17.297649716941	35.20113659448
20	10	Max_Diff_CorrelationDetector	1	286	371	131	131	0	0.111111111111111	0.353099730458221	0.671159029649596	0.363636363636364	0.0588235294117647	0	18.4136749649578	35.6284851320932
20	10	Max_Diff_CorrelationDetector	3	248	287	111	111	0	0.205555555555556	0.386759581881533	0.627177700348432	0.565217391304348	0.0869565217391304	0.0705882352941176	19.3410382411168	38.1346033968417
20	10	Max_Diff_CorrelationDetector	3	350	581	129	129	0	0.0974025974025974	0.222030981067126	0.476764199655766	0.24	0.0357142857142857	0.0707547169811321	17.1114357973741	34.7387346292886
20	10	Max_Diff_CorrelationDetector	3	325	555	215	215	0	0.162866449511401	0.387387387387387	0.664864864864865	0.404255319148936	0.235294117647059	0.0333333333333333	17.5230481159358	34.1807536569313
20	10	Max_Diff_CorrelationDetector	0	231	99	57	57	0	0.411764705882353	0.575757575757576	0.868686868686869	0.351351351351351	0.2	0.205882352941176	14.4365248011855	33.7830393590771
20	10	Max_Diff_CorrelationDetector	2	305	450	193	193	0	0.183856502242152	0.428888888888889	0.7	0.522727272727273	0.162790697674419	0.0491803278688525	16.5399096680766	35.5320478122491
20	10	Max_Diff_CorrelationDetector	3	304	393	139	139	0	0.159090909090909	0.353689567430025	0.659033078880407	0.46875	0.159090909090909	0.0517241379310345	13.7644933334082	30.8744910301708
20	10	Max_Diff_CorrelationDetector	2	304	365	122	122	0	0.159090909090909	0.334246575342466	0.624657534246575	0.212121212121212	0.166666666666667	0.0928571428571429	14.6695200337363	32.9834971860907
20	10	Max_Diff_CorrelationDetector	2	342	327	71	71	0	0.109090909090909	0.217125382262997	0.428134556574924	0.326086956521739	0.0294117647058824	0.0702702702702703	15.4534175905786	34.3415445956956
20	10	Max_Diff_CorrelationDetector	2	337	376	85	85	0	0.0774410774410774	0.226063829787234	0.452127659574468	0.414634146341463	0	0.00546448087431694	16.2771956734789	34.8826302914822
20	10	Max_Diff_CorrelationDetector	1	278	283	85	85	0	0.129943502824859	0.300353356890459	0.498233215547703	0.4375	0	0	14.9237943172989	32.1201726895607
20	10	Max_Diff_CorrelationDetector	0	258	221	98	98	0	0.184713375796178	0.443438914027149	0.728506787330317	0.239130434782609	0.321428571428571	0.0967741935483871	16.4117017571247	35.7950335059642
20	10	Max_Diff_CorrelationDetector	1	225	154	38	38	0	0.0967741935483871	0.246753246753247	0.441558441558442	0.183673469387755	0.1	0.0144927536231884	15.0320834646008	34.4551034926197
20	10	Max_Diff_CorrelationDetector	0	262	147	49	49	0	0.173553719008264	0.333333333333333	0.54421768707483	0.388888888888889	0	0.0434782608695652	14.6076976684587	33.8692278869173
20	10	Max_Diff_CorrelationDetector	3	360	585	209	209	0	0.133333333333333	0.357264957264957	0.683760683760684	0.306122448979592	0.151515151515152	0.045	17.3359785806122	36.2373328756379
20	10	Max_Diff_CorrelationDetector	5	637	826	228	228	0	0.140287769784173	0.276029055690073	0.595641646489104	0.148148148148148	0.268292682926829	0.101654846335697	16.4932827940939	34.5676172118226
20	10	Max_Diff_CorrelationDetector	1	172	281	147	147	0	0.302083333333333	0.523131672597865	0.758007117437722	0.262295081967213	0.291666666666667	0.210526315789474	15.5388565399765	34.241124530572
20	10	Max_Diff_CorrelationDetector	2	359	403	129	129	0	0.116279069767442	0.320099255583127	0.588089330024814	0.386363636363636	0.0869565217391304	0.0163934426229508	15.9772846685891	34.1059270444325
20	10	Max_Diff_CorrelationDetector	0	235	262	121	121	0	0.252032520325203	0.461832061068702	0.713740458015267	0.405405405405405	0.153846153846154	0.166666666666667	14.745579251037	31.900363236261
20	10	Max_Diff_CorrelationDetector	1	239	231	125	125	0	0.244897959183673	0.541125541125541	0.844155844155844	0.571428571428571	0.1875	0.0769230769230769	16.4208137290318	35.6651846120282
20	10	Max_Diff_CorrelationDetector	1	261	294	109	109	0	0.2	0.370748299319728	0.687074829931973	0.414634146341463	0.175	0.0833333333333333	15.1284101467719	33.2614135762855
20	10	Max_Diff_CorrelationDetector	0	203	259	132	132	0	0.301587301587302	0.50965250965251	0.810810810810811	0.39622641509434	0.3	0.0697674418604651	16.5269873551401	35.380883111618
20	10	Max_Diff_CorrelationDetector	1	247	408	115	115	0	0.129464285714286	0.281862745098039	0.651960784313726	0.3125	0.142857142857143	0.00869565217391304	15.2839349560479	32.4067437834342
20	10	Max_Diff_CorrelationDetector	3	236	424	163	163	0	0.174358974358974	0.384433962264151	0.679245283018868	0.360655737704918	0.138888888888889	0.0510204081632653	18.3014208703176	38.3817543299286
20	10	Max_Diff_CorrelationDetector	1	269	386	165	165	0	0.2	0.427461139896373	0.686528497409326	0.458333333333333	0.138888888888889	0.0365853658536585	18.894647958808	37.3541225453545
20	10	Max_Diff_CorrelationDetector	1	199	302	169	169	0	0.340425531914894	0.559602649006622	0.827814569536424	0.384615384615385	0.404761904761905	0.0975609756097561	18.2584043197711	36.3737281184812
20	10	Max_Diff_CorrelationDetector	0	152	238	175	175	0	0.524390243902439	0.735294117647059	0.890756302521008	0.535211267605634	0	0	18.1041956501891	36.2942661437361
20	10	Max_Diff_CorrelationDetector	0	208	322	194	194	0	0.327272727272727	0.602484472049689	0.829192546583851	0.492307692307692	0.25	0.0222222222222222	20.073357619364	39.0857771392693
20	10	Max_Diff_CorrelationDetector	0	205	280	172	172	0	0.366412213740458	0.614285714285714	0.907142857142857	0.489795918367347	0.166666666666667	0.666666666666667	18.1927807657823	36.918767112386
20	10	Max_Diff_CorrelationDetector	2	349	413	163	163	0	0.185873605947955	0.394673123486683	0.602905569007264	0.688888888888889	0.0454545454545455	0.075	17.8966281433759	37.0592586538846
20	10	Max_Diff_CorrelationDetector	0	170	156	98	98	0	0.454545454545455	0.628205128205128	0.91025641025641	0.470588235294118	0.375	0	16.5434351326027	34.0246362228982
20	10	Max_Diff_CorrelationDetector	2	306	513	289	289	0	0.324817518248175	0.563352826510721	0.828460038986355	0.630769230769231	0.25	0.225225225225225	21.9160882477462	41.6499126265313
20	10	Max_Diff_CorrelationDetector	3	359	439	113	113	0	0.0806451612903226	0.257403189066059	0.542141230068337	0.423076923076923	0.0384615384615385	0	18.4078998591856	35.9084450173094
20	10	Max_Diff_CorrelationDetector	2	250	348	137	137	0	0.142857142857143	0.39367816091954	0.704022988505747	0.306451612903226	0.107142857142857	0.0714285714285714	18.562847916484	36.2594552138906
20	10	Max_Diff_CorrelationDetector	0	206	334	194	194	0	0.24025974025974	0.580838323353293	0.808383233532934	0.485294117647059	0.157894736842105	0	18.5308088391715	37.5634475617353
20	10	Max_Diff_CorrelationDetector	1	263	237	105	105	0	0.221374045801527	0.443037974683544	0.780590717299578	0.292682926829268	0.0666666666666667	0.180722891566265	17.6876805815854	38.23232511287
20	10	Max_Diff_CorrelationDetector	2	433	632	280	280	0	0.205	0.443037974683544	0.705696202531646	0.7	0.277777777777778	0.0676328502415459	21.0134374002614	39.8744942228309
20	10	Max_Diff_CorrelationDetector	2	193	205	75	75	0	0.229166666666667	0.365853658536585	0.678048780487805	0.362068965517241	0.15625	0.0425531914893617	17.8701994181937	36.6432626087126
20	10	Max_Diff_CorrelationDetector	2	224	273	132	132	0	0.263513513513513	0.483516483516484	0.717948717948718	0.517857142857143	0.192307692307692	0.0588235294117647	18.613071704494	37.9840992195267
20	10	Max_Diff_CorrelationDetector	3	285	513	202	202	0	0.112	0.393762183235867	0.670565302144249	0.338461538461538	0.133333333333333	0.0144927536231884	19.5516102247387	37.4185976678702
20	10	Max_Diff_CorrelationDetector	0	196	214	124	124	0	0.3515625	0.579439252336449	0.883177570093458	0.396551724137931	0.166666666666667	0	17.4295244981417	35.7471868741597
20	10	Max_Diff_CorrelationDetector	3	258	328	151	151	0	0.225641025641026	0.460365853658537	0.792682926829268	0.340425531914894	0.115384615384615	0.0574712643678161	18.8367759924623	38.1570558683195
20	10	Max_Diff_CorrelationDetector	3	379	527	194	194	0	0.131901840490798	0.368121442125237	0.633776091081594	0.457142857142857	0.189655172413793	0.0251572327044025	17.3642246745426	36.2461805032483
20	10	Max_Diff_CorrelationDetector	1	289	285	95	95	0	0.158653846153846	0.333333333333333	0.624561403508772	0.346153846153846	0.0909090909090909	0.108527131782946	16.3684131763235	33.7077194121965
2	10	noFreq_Diff_CorrelationDetector	3	401	632	13	13	0	0	0.0205696202531646	0.0981012658227848	0	0	0	1.33676272712262	2.295320460217
2	10	noFreq_Diff_CorrelationDetector	5	562	890	13	13	0	0.00756143667296786	0.0146067415730337	0.0808988764044944	0	0	0.00888888888888889	1.18655642522575	1.41810817247797
2	10	noFreq_Diff_CorrelationDetector	5	502	706	23	23	0	0.00652173913043478	0.0325779036827195	0.106232294617564	0.0384615384615385	0	0.00256410256410256	1.39654406627714	2.54724290602998
2	10	noFreq_Diff_CorrelationDetector	5	383	515	30	30	0	0.0192926045016077	0.058252427184466	0.141747572815534	0.0882352941176471	0.0384615384615385	0.00446428571428571	1.90006320014514	5.27166341420696
2	10	noFreq_Diff_CorrelationDetector	4	430	722	20	20	0	0.00253164556962025	0.0277008310249307	0.0789473684210526	0.027027027027027	0	0	1.18013112488921	1.51590176368733
2	10	noFreq_Diff_CorrelationDetector	3	387	483	10	10	0	0.00320512820512821	0.020703933747412	0.0559006211180124	0.0204081632653061	0	0	0.872049206081185	0.579900226449734
2	10	noFreq_Diff_CorrelationDetector	2	350	373	13	13	0	0.0222929936305732	0.0348525469168901	0.0884718498659517	0.0212765957446809	0	0.0214592274678112	2.10989619499947	5.08987762653751
2	10	noFreq_Diff_CorrelationDetector	3	323	387	6	6	0	0.00336700336700337	0.0155038759689922	0.0981912144702842	0	0.0232558139534884	0	2.07438719354142	5.84256987482845
2	10	noFreq_Diff_CorrelationDetector	4	414	492	37	37	0	0.0368421052631579	0.0752032520325203	0.17479674796748	0.0526315789473684	0	0.0185873605947955	2.18915858606358	5.70951097223033
2	10	noFreq_Diff_CorrelationDetector	2	345	504	16	16	0	0.0222929936305732	0.0317460317460317	0.101190476190476	0	0	0.0348258706467662	2.05195522445817	4.49946823410323
2	10	noFreq_Diff_CorrelationDetector	4	440	620	8	8	0	0.00731707317073171	0.0129032258064516	0.0532258064516129	0.0196078431372549	0	0.0060790273556231	0.887891485581704	0.461971753388016
2	10	noFreq_Diff_CorrelationDetector	3	382	361	5	5	0	0.00680272108843537	0.0138504155124654	0.0498614958448753	0	0.04	0.00436681222707424	1.15451624562473	1.4324660492774
2	10	noFreq_Diff_CorrelationDetector	3	365	507	24	24	0	0.0167785234899329	0.0473372781065089	0.140039447731755	0.0487804878048781	0.0625	0.00436681222707424	1.74988605291885	2.47026477245832
2	10	noFreq_Diff_CorrelationDetector	2	301	376	21	21	0	0.0111940298507463	0.0558510638297872	0.0957446808510638	0.0256410256410256	0.0192307692307692	0.00714285714285714	1.78765915622548	2.3310735000398
2	10	noFreq_Diff_CorrelationDetector	4	456	567	36	36	0	0.0257611241217799	0.0634920634920635	0.128747795414462	0.157894736842105	0	0.014367816091954	1.2457667835459	1.32697086490306
2	10	noFreq_Diff_CorrelationDetector	5	384	444	20	20	0	0.0032258064516129	0.045045045045045	0.128378378378378	0.0294117647058824	0	0	1.38310023665172	2.46470801469684
2	10	noFreq_Diff_CorrelationDetector	3	277	409	2	2	0	0	0.00488997555012225	0.0537897310513447	0	0	0	0.751335716713697	0.662994916812664
2	10	noFreq_Diff_CorrelationDetector	4	361	629	15	15	0	0.0032258064516129	0.0238473767885533	0.0763116057233704	0	0	0	0.935062817866424	0.627140987369773
2	10	noFreq_Diff_CorrelationDetector	3	292	348	5	5	0	0	0.014367816091954	0.0517241379310345	0	0	0	1.27497199345597	1.04350155507712
2	10	noFreq_Diff_CorrelationDetector	4	374	499	6	6	0	0.0033003300330033	0.0120240480961924	0.0480961923847695	0.0232558139534884	0	0	1.29072061152871	1.80619128895704
2	10	noFreq_Diff_CorrelationDetector	4	267	201	2	2	0	0.00584795321637427	0.00995024875621891	0.0298507462686567	0.0294117647058824	0	0	0.717168295344086	0.267018547628899
2	10	noFreq_Diff_CorrelationDetector	4	414	477	0	0	0	0	0	0.0188679245283019	0	0	0	0.59630816150853	0.181177423373639
2	10	noFreq_Diff_CorrelationDetector	3	374	460	16	16	0	0.00955414012738853	0.0347826086956522	0.102173913043478	0.0222222222222222	0	0.00869565217391304	1.24918634137913	0.980916978027788
2	10	noFreq_Diff_CorrelationDetector	4	346	466	17	17	0	0.00709219858156028	0.036480686695279	0.109442060085837	0.0555555555555556	0	0	1.29607262699543	1.19594142267403
2	10	noFreq_Diff_CorrelationDetector	6	481	735	39	39	0	0.00657894736842105	0.0530612244897959	0.123809523809524	0.03125	0	0.00540540540540541	1.31367643019051	2.19736441653242
2	10	noFreq_Diff_CorrelationDetector	5	523	637	1	1	0	0	0.00156985871271586	0.032967032967033	0	0	0	1.17878828032124	1.45434087709977
2	10	noFreq_Diff_CorrelationDetector	4	474	563	13	13	0	0	0.0230905861456483	0.0870337477797513	0	0	0	1.21225840610485	1.52993747905531
2	10	noFreq_Diff_CorrelationDetector	3	465	414	4	4	0	0.00519480519480519	0.00966183574879227	0.0314009661835749	0.0232558139534884	0	0.00306748466257669	0.87789704707456	0.845571707558312
2	10	noFreq_Diff_CorrelationDetector	4	340	403	3	3	0	0.00342465753424658	0.00744416873449132	0.0694789081885856	0.0294117647058824	0	0	0.832834544935023	0.572332082416305
2	10	noFreq_Diff_CorrelationDetector	5	499	652	16	16	0	0.00663716814159292	0.0245398773006135	0.0521472392638037	0	0	0.00531914893617021	0.789191392493023	0.700390719701367
2	10	noFreq_Diff_CorrelationDetector	2	457	580	18	18	0	0.00699300699300699	0.0310344827586207	0.0724137931034483	0	0.0263157894736842	0.00583090379008746	1.12712104090658	1.02293731395749
2	10	noFreq_Diff_CorrelationDetector	4	467	726	21	21	0	0.00251256281407035	0.0289256198347107	0.106060606060606	0.032258064516129	0	0	1.31117686834681	1.7001544866305
2	10	noFreq_Diff_CorrelationDetector	3	289	421	12	12	0	0.00754716981132075	0.0285035629453682	0.0665083135391924	0.0178571428571429	0.0222222222222222	0	1.92419904731599	3.57120395479674
2	10	noFreq_Diff_CorrelationDetector	3	220	336	36	36	0	0.0459770114942529	0.107142857142857	0.181547619047619	0.107142857142857	0.037037037037037	0	1.88439275532146	4.26205153408002
2	10	noFreq_Diff_CorrelationDetector	5	446	507	11	11	0	0.00255102040816327	0.0216962524654832	0.0828402366863905	0.0222222222222222	0	0	1.79916640384955	3.23020223708427
2	10	noFreq_Diff_CorrelationDetector	2	430	521	13	13	0	0.0155440414507772	0.0249520153550864	0.0882917466410749	0.024390243902439	0	0.0167785234899329	1.95381233620489	4.2074326955079
2	10	noFreq_Diff_CorrelationDetector	3	396	404	14	14	0	0.00974025974025974	0.0346534653465347	0.099009900990099	0.0645161290322581	0.025	0	1.70125842840302	2.83729031030551
2	10	noFreq_Diff_CorrelationDetector	6	390	484	16	16	0	0.0167597765363128	0.0330578512396694	0.117768595041322	0	0.0166666666666667	0	1.58930109656336	1.85314518309609
2	10	noFreq_Diff_CorrelationDetector	2	425	520	14	14	0	0.00797872340425532	0.0269230769230769	0.132692307692308	0	0.0425531914893617	0.00355871886120996	1.50104774282323	3.44695549558348
2	10	noFreq_Diff_CorrelationDetector	4	505	1018	40	40	0	0.0179640718562874	0.0392927308447937	0.136542239685658	0.0789473684210526	0.04	0.00769230769230769	1.50893626200814	2.97543328535018
3	10	noFreq_Diff_CorrelationDetector	5	434	653	26	26	0	0.0121065375302663	0.0398162327718224	0.11791730474732	0.125	0	0	2.36114713963879	8.48489520539048
3	10	noFreq_Diff_CorrelationDetector	2	365	431	34	34	0	0.0213523131672598	0.0788863109048724	0.194895591647332	0	0.0277777777777778	0.0157894736842105	3.43996739965947	13.799520956959
3	10	noFreq_Diff_CorrelationDetector	2	287	327	30	30	0	0.0552763819095477	0.0917431192660551	0.2782874617737	0.0833333333333333	0.0555555555555556	0.046875	3.02767460831352	10.006887739065
3	10	noFreq_Diff_CorrelationDetector	4	463	534	42	42	0	0.0191387559808612	0.0786516853932584	0.176029962546816	0.0789473684210526	0.0555555555555556	0.003003003003003	3.61226058139815	14.4080929029881
3	10	noFreq_Diff_CorrelationDetector	2	273	268	47	47	0	0.085	0.175373134328358	0.358208955223881	0.163636363636364	0.05	0.031496062992126	3.45009866464384	13.7322409942972
3	10	noFreq_Diff_CorrelationDetector	4	389	561	31	31	0	0.0198863636363636	0.0552584670231729	0.165775401069519	0.0816326530612245	0.0526315789473684	0	3.43036451733433	12.7868009655745
3	10	noFreq_Diff_CorrelationDetector	2	293	454	19	19	0	0.0169491525423729	0.0418502202643172	0.125550660792952	0.0545454545454545	0	0.0065359477124183	2.56040342688538	8.2757114449422
3	10	noFreq_Diff_CorrelationDetector	3	254	282	9	9	0	0.0130718954248366	0.0319148936170213	0.184397163120567	0.0277777777777778	0	0	2.99539869241496	10.5546878625846
3	10	noFreq_Diff_CorrelationDetector	3	349	323	6	6	0	0.0153256704980843	0.0185758513931889	0.0619195046439628	0.0571428571428571	0	0	1.95068108215188	6.21262440483158
3	10	noFreq_Diff_CorrelationDetector	4	391	523	55	55	0	0.045822102425876	0.105162523900574	0.24282982791587	0.0816326530612245	0.13953488372093	0.0245614035087719	3.20189577293788	10.3971130183084
3	10	noFreq_Diff_CorrelationDetector	3	471	693	43	43	0	0.0172839506172839	0.062049062049062	0.155844155844156	0.125	0.0517241379310345	0	3.55116665796559	14.3943603411268
3	10	noFreq_Diff_CorrelationDetector	2	310	341	40	40	0	0.0606060606060606	0.117302052785924	0.331378299120235	0.19047619047619	0	0.04	3.12346651624601	13.0228738531309
3	10	noFreq_Diff_CorrelationDetector	5	404	899	42	42	0	0.00831024930747922	0.0467185761957731	0.166852057842047	0.0487804878048781	0.0204081632653061	0	2.43677488735564	9.20044199659
3	10	noFreq_Diff_CorrelationDetector	3	272	502	23	23	0	0.024390243902439	0.0458167330677291	0.155378486055777	0.04	0.0740740740740741	0.00793650793650794	2.42662596407455	9.5602416926904
3	10	noFreq_Diff_CorrelationDetector	1	250	299	5	5	0	0	0.0167224080267559	0.107023411371237	0	0	0	2.64234800981488	9.05976424106331
3	10	noFreq_Diff_CorrelationDetector	2	235	397	61	61	0	0.0591133004926108	0.153652392947103	0.299748110831234	0.122448979591837	0	0.0120481927710843	4.77427256764187	21.0426955865592
3	10	noFreq_Diff_CorrelationDetector	1	401	414	60	60	0	0.05	0.144927536231884	0.277777777777778	0.181818181818182	0	0.0326086956521739	4.92790837083876	22.0692627529364
3	10	noFreq_Diff_CorrelationDetector	3	367	402	52	52	0	0.0950570342205323	0.129353233830846	0.263681592039801	0.0689655172413793	0.0344827586206897	0.101522842639594	4.30358723573025	18.5456763025616
3	10	noFreq_Diff_CorrelationDetector	3	442	645	41	41	0	0.0190735694822888	0.0635658914728682	0.198449612403101	0.0344827586206897	0.0217391304347826	0.0175438596491228	3.26856398461052	13.0450073969015
3	10	noFreq_Diff_CorrelationDetector	3	420	515	73	73	0	0.046070460704607	0.141747572815534	0.264077669902913	0.342857142857143	0.0925925925925926	0	3.50971571815596	14.6295649969387
3	10	noFreq_Diff_CorrelationDetector	3	270	317	25	25	0	0.0425531914893617	0.0788643533123028	0.201892744479495	0.140625	0	0	2.23418380167951	8.21915326385043
3	10	noFreq_Diff_CorrelationDetector	3	255	322	26	26	0	0.0439024390243902	0.0807453416149068	0.245341614906832	0.103448275862069	0	0.0258620689655172	3.2664927357318	11.5715122216504
3	10	noFreq_Diff_CorrelationDetector	1	312	230	7	7	0	0	0.0304347826086957	0.130434782608696	0	0	0	2.84754086002339	9.185961665324
3	10	noFreq_Diff_CorrelationDetector	6	655	904	57	57	0	0.0216049382716049	0.0630530973451327	0.169247787610619	0.2	0.0363636363636364	0.00710479573712256	2.84166990643277	11.6281345894663
3	10	noFreq_Diff_CorrelationDetector	2	345	377	22	22	0	0.0263157894736842	0.0583554376657825	0.204244031830239	0.025	0.032258064516129	0.0158730158730159	3.17449547000539	12.0155828102768
3	10	noFreq_Diff_CorrelationDetector	3	314	404	21	21	0	0.00749063670411985	0.051980198019802	0.168316831683168	0.0512820512820513	0	0	3.00276277291484	10.8344863330695
3	10	noFreq_Diff_CorrelationDetector	2	392	431	10	10	0	0.00579710144927536	0.0232018561484919	0.0904872389791183	0.024390243902439	0	0.00384615384615385	2.10527184995347	7.15620853776835
3	10	noFreq_Diff_CorrelationDetector	5	357	543	44	44	0	0.0371428571428571	0.0810313075506446	0.252302025782689	0.0612244897959184	0.0153846153846154	0.0340425531914894	5.17411742915177	21.2837945111438
3	10	noFreq_Diff_CorrelationDetector	3	302	584	108	108	0	0.0675675675675676	0.184931506849315	0.38013698630137	0.166666666666667	0.104166666666667	0.0236686390532544	5.61752786981907	22.0085249329369
3	10	noFreq_Diff_CorrelationDetector	3	309	400	67	67	0	0.12624584717608	0.1675	0.3675	0.121212121212121	0	0.0729166666666667	5.25757227133834	21.6899569855278
3	10	noFreq_Diff_CorrelationDetector	1	284	568	61	61	0	0.0412844036697248	0.107394366197183	0.23943661971831	0.0697674418604651	0.0357142857142857	0.016260162601626	3.13538321053445	12.3146197193679
3	10	noFreq_Diff_CorrelationDetector	1	295	381	41	41	0	0.0387596899224806	0.10761154855643	0.217847769028871	0.0943396226415094	0.04	0.0220588235294118	3.88961411747138	15.550105035672
3	10	noFreq_Diff_CorrelationDetector	1	364	403	17	17	0	0.0212014134275618	0.0421836228287841	0.156327543424318	0.027027027027027	0.0606060606060606	0.0103626943005181	3.59450884879096	14.9189937667915
3	10	noFreq_Diff_CorrelationDetector	4	439	610	38	38	0	0.00775193798449612	0.0622950819672131	0.160655737704918	0.0256410256410256	0.0444444444444444	0	2.71602655386188	9.28660236013574
3	10	noFreq_Diff_CorrelationDetector	1	334	300	49	49	0	0.0761904761904762	0.163333333333333	0.23	0.161290322580645	0	0.0650406504065041	3.92337094872521	16.7447806950771
3	10	noFreq_Diff_CorrelationDetector	3	289	310	57	57	0	0.105263157894737	0.183870967741935	0.319354838709677	0.245901639344262	0.111111111111111	0	3.73946415244332	13.0009996310355
5	10	noFreq_Diff_CorrelationDetector	4	391	478	40	40	0	0.044973544973545	0.0836820083682008	0.265690376569038	0.147540983606557	0	0.0138888888888889	5.33104425953968	19.4823013643932
5	10	noFreq_Diff_CorrelationDetector	1	339	415	34	34	0	0.0294117647058824	0.0819277108433735	0.293975903614458	0.0909090909090909	0.0238095238095238	0	4.93597747503446	19.4114962883156
5	10	noFreq_Diff_CorrelationDetector	4	456	536	46	46	0	0.05	0.0858208955223881	0.242537313432836	0.0625	0.138888888888889	0.0174825174825175	5.38088856312384	20.5617259896135
5	10	noFreq_Diff_CorrelationDetector	2	328	364	21	21	0	0.0260223048327138	0.0576923076923077	0.230769230769231	0.0980392156862745	0.0625	0	4.42774956995517	17.3460654071867
5	10	noFreq_Diff_CorrelationDetector	3	354	319	44	44	0	0.0490566037735849	0.137931034482759	0.29153605015674	0.236842105263158	0	0.018957345971564	4.03662751163555	15.1579046239897
5	10	noFreq_Diff_CorrelationDetector	2	341	315	14	14	0	0.025	0.0444444444444444	0.177777777777778	0.075	0	0.0104166666666667	3.50898930560715	13.6692211462158
5	10	noFreq_Diff_CorrelationDetector	3	350	533	64	64	0	0.0345911949685535	0.120075046904315	0.363977485928705	0.111111111111111	0.037037037037037	0.00975609756097561	5.82359770861642	21.3661457312056
5	10	noFreq_Diff_CorrelationDetector	3	398	626	137	137	0	0.0679347826086956	0.218849840255591	0.442492012779553	0.294117647058824	0.0476190476190476	0.0243055555555556	5.55352950357353	20.9996628802963
5	10	noFreq_Diff_CorrelationDetector	4	477	528	29	29	0	0.0120192307692308	0.0549242424242424	0.176136363636364	0.0714285714285714	0.0217391304347826	0	4.80374198127998	19.205090193967
5	10	noFreq_Diff_CorrelationDetector	6	483	640	48	48	0	0.0356394129979036	0.075	0.21875	0.177777777777778	0.0576923076923077	0.0158311345646438	5.91983530154023	21.8559647418665
5	10	noFreq_Diff_CorrelationDetector	2	451	601	81	81	0	0.0523809523809524	0.13477537437604	0.334442595673877	0.0833333333333333	0	0.060126582278481	6.84451297657205	24.0597679172758
5	10	noFreq_Diff_CorrelationDetector	3	281	170	16	16	0	0.0148148148148148	0.0941176470588235	0.205882352941176	0.0714285714285714	0	0	3.71832155118603	14.3802642773004
5	10	noFreq_Diff_CorrelationDetector	1	229	248	29	29	0	0.0617283950617284	0.116935483870968	0.254032258064516	0.175438596491228	0	0	4.74002230368313	18.9869936929332
5	10	noFreq_Diff_CorrelationDetector	4	413	742	83	83	0	0.055	0.111859838274933	0.307277628032345	0.0888888888888889	0	0.0596026490066225	5.01952717267165	18.1318012953094
5	10	noFreq_Diff_CorrelationDetector	7	363	562	103	103	0	0.0741839762611276	0.183274021352313	0.359430604982206	0.194444444444444	0.0921052631578947	0.0460829493087558	6.71200452199314	25.2145653318692
5	10	noFreq_Diff_CorrelationDetector	1	262	307	63	63	0	0.124352331606218	0.205211726384365	0.521172638436482	0.272727272727273	0	0.079646017699115	6.24496794517049	21.9994976529232
5	10	noFreq_Diff_CorrelationDetector	4	371	568	103	103	0	0.0443213296398892	0.181338028169014	0.338028169014085	0.21875	0.027027027027027	0	7.08481208222486	24.3146448759863
5	10	noFreq_Diff_CorrelationDetector	3	296	589	138	138	0	0.0970149253731343	0.234295415959253	0.516129032258065	0.297297297297297	0.0327868852459016	0.0536912751677852	6.95638375759932	24.1545995058527
5	10	noFreq_Diff_CorrelationDetector	3	305	344	62	62	0	0.0524017467248908	0.180232558139535	0.354651162790698	0.18	0.0357142857142857	0.0125786163522013	6.73151849527685	23.9943076801362
5	10	noFreq_Diff_CorrelationDetector	5	446	731	124	124	0	0.0408163265306122	0.169630642954856	0.321477428180575	0.290909090909091	0.02	0.00293255131964809	7.89111981636914	27.7687259426053
5	10	noFreq_Diff_CorrelationDetector	2	343	408	55	55	0	0.056140350877193	0.134803921568627	0.32843137254902	0.1875	0	0.032258064516129	5.55504931942004	20.6051403135966
5	10	noFreq_Diff_CorrelationDetector	3	314	293	33	33	0	0.0271739130434783	0.112627986348123	0.351535836177474	0.114285714285714	0	0	4.74119470279683	17.7963751203025
5	10	noFreq_Diff_CorrelationDetector	4	432	639	97	97	0	0.050131926121372	0.151799687010955	0.302034428794992	0.333333333333333	0.0701754385964912	0.0218181818181818	4.78312908026755	18.3883855716672
5	10	noFreq_Diff_CorrelationDetector	4	298	311	43	43	0	0.04	0.138263665594855	0.331189710610932	0.194444444444444	0.0232558139534884	0	4.11041816550286	15.9417298005959
5	10	noFreq_Diff_CorrelationDetector	2	338	434	25	25	0	0.0214067278287462	0.0576036866359447	0.230414746543779	0.0597014925373134	0	0.00896860986547085	5.28741782527901	21.0847435514214
5	10	noFreq_Diff_CorrelationDetector	3	407	353	63	63	0	0.0944625407166124	0.178470254957507	0.308781869688385	0.290322580645161	0	0.041025641025641	5.0674325362933	21.4785639221685
5	10	noFreq_Diff_CorrelationDetector	2	344	261	18	18	0	0.0136986301369863	0.0689655172413793	0.122605363984674	0.0606060606060606	0	0	4.11108884810123	16.5492745356004
5	10	noFreq_Diff_CorrelationDetector	4	285	328	65	65	0	0.121076233183857	0.198170731707317	0.36890243902439	0.256410256410256	0.02	0	5.38542029140658	21.4959931127443
5	10	noFreq_Diff_CorrelationDetector	6	487	568	74	74	0	0.0577777777777778	0.130281690140845	0.220070422535211	0.236842105263158	0.114285714285714	0.0306406685236769	4.73547468492088	18.4174957961034
5	10	noFreq_Diff_CorrelationDetector	3	263	347	45	45	0	0.0298507462686567	0.129682997118156	0.331412103746398	0.0833333333333333	0	0.0198019801980198	5.48786530519697	20.7530004725582
5	10	noFreq_Diff_CorrelationDetector	3	340	423	56	56	0	0.0709219858156028	0.132387706855792	0.371158392434988	0.150943396226415	0	0.0558139534883721	6.21326566303622	24.5840643122222
5	10	noFreq_Diff_CorrelationDetector	2	397	495	67	67	0	0.0265957446808511	0.135353535353535	0.298989898989899	0.078125	0.0344827586206897	0.0134680134680135	6.02806909246682	22.5768189680843
5	10	noFreq_Diff_CorrelationDetector	1	353	653	86	86	0	0.0283018867924528	0.131699846860643	0.321592649310873	0.238095238095238	0.0428571428571429	0	5.27005848841923	19.4321432914549
5	10	noFreq_Diff_CorrelationDetector	0	184	108	25	25	0	0.125	0.231481481481481	0.351851851851852	0.218181818181818	0	0	4.70646437411846	18.1088545427888
5	10	noFreq_Diff_CorrelationDetector	6	492	703	89	89	0	0.0441176470588235	0.126600284495021	0.248933143669986	0.340909090909091	0.0731707317073171	0.00261096605744125	6.06376158605743	22.4927947445562
5	10	noFreq_Diff_CorrelationDetector	3	254	278	54	54	0	0.0963855421686747	0.194244604316547	0.420863309352518	0.318181818181818	0.0740740740740741	0	5.56018165041168	20.7865853611895
5	10	noFreq_Diff_CorrelationDetector	3	355	639	161	161	0	0.0900621118012422	0.251956181533646	0.406885758998435	0.320754716981132	0.0666666666666667	0.0146341463414634	7.26302401977791	24.9759860327738
5	10	noFreq_Diff_CorrelationDetector	6	518	848	94	94	0	0.0214007782101167	0.110849056603774	0.281839622641509	0.142857142857143	0	0.0121654501216545	6.52840993234249	23.8527562484169
5	10	noFreq_Diff_CorrelationDetector	0	279	414	110	110	0	0.116402116402116	0.265700483091787	0.466183574879227	0.352941176470588	0	0.0245901639344262	6.34080885642278	24.1196005921111
5	10	noFreq_Diff_CorrelationDetector	4	360	398	29	29	0	0.00719424460431655	0.0728643216080402	0.226130653266332	0.0425531914893617	0	0	4.83425776957039	18.3856564420055
7	10	noFreq_Diff_CorrelationDetector	1	287	273	49	49	0	0.0756756756756757	0.179487179487179	0.395604395604396	0.289473684210526	0	0.0113636363636364	6.5106977190577	22.5117155544033
7	10	noFreq_Diff_CorrelationDetector	1	330	299	57	57	0	0.137254901960784	0.190635451505017	0.364548494983278	0.344827586206897	0.0625	0.0902255639097744	6.53264782501976	23.781480997061
7	10	noFreq_Diff_CorrelationDetector	3	345	539	122	122	0	0.07	0.226345083487941	0.402597402597403	0.395833333333333	0.05	0	6.64547197560088	23.3760789461336
7	10	noFreq_Diff_CorrelationDetector	2	308	245	32	32	0	0.0536585365853659	0.130612244897959	0.236734693877551	0.0689655172413793	0.0294117647058824	0.0230769230769231	4.64980242508596	17.175318929587
7	10	noFreq_Diff_CorrelationDetector	0	232	195	36	36	0	0.0534351145038168	0.184615384615385	0.317948717948718	0.0909090909090909	0	0	5.58607619865323	20.9332724734252
7	10	noFreq_Diff_CorrelationDetector	3	270	394	118	118	0	0.119148936170213	0.299492385786802	0.444162436548223	0.441860465116279	0.09375	0.00869565217391304	6.82584372511025	23.7816997486763
7	10	noFreq_Diff_CorrelationDetector	2	386	499	113	113	0	0.0689655172413793	0.226452905811623	0.382765531062124	0.34	0.0357142857142857	0.0226415094339623	6.49624610862108	22.1639296443066
7	10	noFreq_Diff_CorrelationDetector	4	297	409	92	92	0	0.105691056910569	0.224938875305623	0.511002444987775	0.25	0.0769230769230769	0.0636942675159236	7.62902837877342	24.0171462217999
7	10	noFreq_Diff_CorrelationDetector	4	454	761	172	172	0	0.0796019900497512	0.226018396846255	0.459921156373193	0.388888888888889	0.0888888888888889	0.0378548895899054	8.97097988940434	27.5611080855376
7	10	noFreq_Diff_CorrelationDetector	3	283	342	45	45	0	0.0358744394618834	0.131578947368421	0.339181286549708	0.125	0	0.0150375939849624	6.11692552889217	20.1582520377277
7	10	noFreq_Diff_CorrelationDetector	2	338	379	109	109	0	0.0739299610894942	0.287598944591029	0.609498680738786	0.354166666666667	0	0.00840336134453781	8.37978010146638	26.1654181989042
7	10	noFreq_Diff_CorrelationDetector	3	493	530	44	44	0	0.0323325635103926	0.0830188679245283	0.328301886792453	0.05	0.0666666666666667	0.0257352941176471	7.51701681965082	26.0890147136466
7	10	noFreq_Diff_CorrelationDetector	2	420	564	89	89	0	0.0498614958448753	0.157801418439716	0.359929078014184	0.225	0.0882352941176471	0	7.4104947555329	25.2422895300048
7	10	noFreq_Diff_CorrelationDetector	2	306	396	110	110	0	0.0748898678414097	0.277777777777778	0.492424242424242	0.229166666666667	0.0555555555555556	0	7.83557075448327	25.0548737232647
7	10	noFreq_Diff_CorrelationDetector	3	287	258	40	40	0	0.0825242718446602	0.155038759689922	0.333333333333333	0.162790697674419	0.125	0.0364963503649635	6.45400116997857	22.8469428457933
7	10	noFreq_Diff_CorrelationDetector	2	354	346	28	28	0	0.0453074433656958	0.0809248554913295	0.23121387283237	0.114285714285714	0.0540540540540541	0.0316742081447964	5.92078040619957	20.5855072152701
7	10	noFreq_Diff_CorrelationDetector	2	319	228	21	21	0	0.031413612565445	0.0921052631578947	0.236842105263158	0.153846153846154	0	0.0166666666666667	5.65248292412337	20.2158443475585
7	10	noFreq_Diff_CorrelationDetector	3	406	690	128	128	0	0.0645161290322581	0.185507246376812	0.401449275362319	0.0869565217391304	0.0227272727272727	0.0200803212851406	7.89284294022069	25.6772450776712
7	10	noFreq_Diff_CorrelationDetector	4	332	484	85	85	0	0.111524163568773	0.175619834710744	0.402892561983471	0.111111111111111	0.0416666666666667	0	7.74011715384338	27.2380414095427
7	10	noFreq_Diff_CorrelationDetector	2	257	226	34	34	0	0.0617977528089888	0.150442477876106	0.287610619469027	0.166666666666667	0.0277777777777778	0.00934579439252336	6.863279508699	24.7932308766025
7	10	noFreq_Diff_CorrelationDetector	2	369	391	39	39	0	0.0551948051948052	0.0997442455242967	0.227621483375959	0.290909090909091	0.0384615384615385	0	5.70193004054992	19.0283237494185
7	10	noFreq_Diff_CorrelationDetector	3	310	409	103	103	0	0.0638297872340425	0.251833740831296	0.449877750611247	0.0588235294117647	0.16	0.0253164556962025	9.0252722738645	27.2389952806051
7	10	noFreq_Diff_CorrelationDetector	1	208	486	151	151	0	0.184713375796178	0.310699588477366	0.683127572016461	0.258064516129032	0.142857142857143	0.151515151515152	9.36741035448714	28.4095045490648
7	10	noFreq_Diff_CorrelationDetector	3	286	312	52	52	0	0.0621468926553672	0.166666666666667	0.375	0.153846153846154	0.0344827586206897	0.032	7.36669475799872	25.4252558936045
7	10	noFreq_Diff_CorrelationDetector	3	303	563	128	128	0	0.0566666666666667	0.227353463587922	0.436944937833037	0.113207547169811	0.0806451612903226	0.021978021978022	8.52992929396576	27.2988606584864
7	10	noFreq_Diff_CorrelationDetector	2	320	522	144	144	0	0.116666666666667	0.275862068965517	0.505747126436782	0.212121212121212	0.157894736842105	0	9.33436390504743	29.7546691531377
7	10	noFreq_Diff_CorrelationDetector	6	564	1021	216	216	0	0.0450281425891182	0.211557296767875	0.409402546523017	0.178571428571429	0.0377358490566038	0.0333333333333333	8.03108205194416	24.4814491328501
7	10	noFreq_Diff_CorrelationDetector	2	231	298	64	64	0	0.0949367088607595	0.214765100671141	0.513422818791946	0.209302325581395	0.119047619047619	0.0125	7.06979634185939	23.3630944604742
7	10	noFreq_Diff_CorrelationDetector	1	253	224	65	65	0	0.165644171779141	0.290178571428571	0.535714285714286	0.304347826086957	0.0909090909090909	0.0483870967741935	6.99350629689373	23.3290362456535
7	10	noFreq_Diff_CorrelationDetector	2	401	379	63	63	0	0.0804953560371517	0.16622691292876	0.303430079155673	0.340425531914894	0.0689655172413793	0.025531914893617	7.6180744028402	26.2094304668533
7	10	noFreq_Diff_CorrelationDetector	2	283	476	103	103	0	0.0932203389830508	0.216386554621849	0.453781512605042	0.325581395348837	0.0192307692307692	0.0367647058823529	7.46045047970831	22.6883091462348
7	10	noFreq_Diff_CorrelationDetector	3	427	640	142	142	0	0.0740740740740741	0.221875	0.4390625	0.162790697674419	0.0454545454545455	0.0516129032258065	9.47202775929112	29.5371734790988
7	10	noFreq_Diff_CorrelationDetector	2	382	331	39	39	0	0.0769230769230769	0.117824773413897	0.299093655589124	0.12	0.0967741935483871	0.0509259259259259	6.82695348104641	22.9387970596797
7	10	noFreq_Diff_CorrelationDetector	1	255	337	46	46	0	0.0292682926829268	0.136498516320475	0.397626112759644	0.0655737704918033	0	0.0165289256198347	8.24783987890604	26.4187085667459
7	10	noFreq_Diff_CorrelationDetector	3	245	348	91	91	0	0.118556701030928	0.261494252873563	0.502873563218391	0.166666666666667	0.166666666666667	0.0549450549450549	9.18454603156664	28.6331504702751
7	10	noFreq_Diff_CorrelationDetector	2	320	579	120	120	0	0.0862068965517241	0.207253886010363	0.459412780656304	0.152173913043478	0.213114754098361	0.0228571428571429	7.04598729948362	24.7532375742523
7	10	noFreq_Diff_CorrelationDetector	1	258	272	93	93	0	0.153374233128834	0.341911764705882	0.551470588235294	0.465116279069767	0.0869565217391304	0	6.6290268040613	23.8832315751203
7	10	noFreq_Diff_CorrelationDetector	2	275	454	140	140	0	0.149038461538462	0.308370044052863	0.5	0.415384615384615	0.0909090909090909	0.0218978102189781	7.20220586043233	23.3626900107695
7	10	noFreq_Diff_CorrelationDetector	2	337	501	124	124	0	0.11787072243346	0.24750499001996	0.44311377245509	0.461538461538462	0.0285714285714286	0.0168539325842697	7.1804382327481	24.7188764498353
7	10	noFreq_Diff_CorrelationDetector	1	351	694	155	155	0	0.0728476821192053	0.223342939481268	0.494236311239193	0.305084745762712	0.0588235294117647	0.0103092783505155	7.98439323862776	28.0571647922322
7	10	noFreq_Diff_CorrelationDetector	1	295	357	112	112	0	0.211981566820276	0.313725490196078	0.529411764705882	0.113636363636364	0.0952380952380952	0.153061224489796	6.33570825374847	23.0035675008447
7	10	noFreq_Diff_CorrelationDetector	1	253	268	64	64	0	0.096045197740113	0.238805970149254	0.417910447761194	0.319148936170213	0.0476190476190476	0	6.7480877295438	23.5229837092591
10	10	noFreq_Diff_CorrelationDetector	1	247	152	38	38	0	0.0775862068965517	0.25	0.506578947368421	0.166666666666667	0	0.0434782608695652	7.54476990272243	23.5357891218485
10	10	noFreq_Diff_CorrelationDetector	3	421	505	116	116	0	0.111111111111111	0.22970297029703	0.463366336633663	0.419354838709677	0.102564102564103	0.0451388888888889	10.2304989183708	28.2699957742684
10	10	noFreq_Diff_CorrelationDetector	1	223	250	72	72	0	0.132352941176471	0.288	0.6	0.244897959183673	0.05	0.0784313725490196	10.7462094211138	31.9922654085001
10	10	noFreq_Diff_CorrelationDetector	3	334	386	60	60	0	0.0663900414937759	0.155440414507772	0.419689119170984	0.153846153846154	0.0727272727272727	0.050314465408805	7.81511171913317	24.0492899548747
10	10	noFreq_Diff_CorrelationDetector	3	290	449	75	75	0	0.0535714285714286	0.167037861915367	0.367483296213808	0.172413793103448	0	0.00657894736842105	8.33197404047132	26.9148078788635
10	10	noFreq_Diff_CorrelationDetector	2	218	270	117	117	0	0.186440677966102	0.433333333333333	0.674074074074074	0.326923076923077	0.1875	0	9.48022132967278	28.1365005564377
10	10	noFreq_Diff_CorrelationDetector	2	300	490	145	145	0	0.157258064516129	0.295918367346939	0.585714285714286	0.295454545454545	0.263157894736842	0.0633802816901408	11.452085350972	30.9825419317222
10	10	noFreq_Diff_CorrelationDetector	3	610	929	213	213	0	0.0854700854700855	0.229278794402583	0.53713670613563	0.46875	0.142857142857143	0.050709939148073	11.5218194102168	31.0591992063918
10	10	noFreq_Diff_CorrelationDetector	0	189	330	146	146	0	0.217054263565891	0.442424242424242	0.815151515151515	0.254237288135593	0.2	0.181818181818182	10.8910174560347	30.0717545437966
10	10	noFreq_Diff_CorrelationDetector	2	274	313	109	109	0	0.17156862745098	0.348242811501597	0.55591054313099	0.391304347826087	0.111111111111111	0.0186915887850467	10.8511375372333	31.9573553805663
10	10	noFreq_Diff_CorrelationDetector	3	303	307	42	42	0	0.024390243902439	0.136807817589577	0.280130293159609	0.115384615384615	0	0	10.2452597820515	29.1543311255989
10	10	noFreq_Diff_CorrelationDetector	1	222	242	68	68	0	0.108527131782946	0.28099173553719	0.607438016528926	0.295454545454545	0	0	10.4340652584479	27.2246617418435
10	10	noFreq_Diff_CorrelationDetector	2	379	798	202	202	0	0.103448275862069	0.2531328320802	0.56390977443609	0.381818181818182	0.136363636363636	0.0230414746543779	14.02682911434	35.0049335643156
10	10	noFreq_Diff_CorrelationDetector	4	352	656	180	180	0	0.0888252148997135	0.274390243902439	0.518292682926829	0.326086956521739	0.146666666666667	0.0218340611353712	13.783221313292	33.4848151050941
10	10	noFreq_Diff_CorrelationDetector	2	318	382	85	85	0	0.0982142857142857	0.222513089005236	0.43979057591623	0.214285714285714	0.153846153846154	0.0072992700729927	10.9326485622016	29.7901384503832
10	10	noFreq_Diff_CorrelationDetector	1	206	353	213	213	0	0.482758620689655	0.603399433427762	0.807365439093484	0.481481481481481	0.12	0	10.7232142255578	29.063307628977
10	10	noFreq_Diff_CorrelationDetector	5	325	501	160	160	0	0.116197183098592	0.31936127744511	0.510978043912176	0.428571428571429	0.184210526315789	0.0053475935828877	11.8183364579598	31.4578749677141
10	10	noFreq_Diff_CorrelationDetector	3	347	460	143	143	0	0.113636363636364	0.310869565217391	0.510869565217391	0.361702127659574	0.204545454545455	0.0346534653465347	12.4780522626172	32.5475374929618
10	10	noFreq_Diff_CorrelationDetector	1	198	223	66	66	0	0.198581560283688	0.295964125560538	0.573991031390135	0.25	0.0714285714285714	0.05	10.3012606795151	28.6740675799356
10	10	noFreq_Diff_CorrelationDetector	2	228	458	178	178	0	0.184331797235023	0.388646288209607	0.611353711790393	0.343283582089552	0.227272727272727	0.0560747663551402	13.9201382248408	35.4945135507872
10	10	noFreq_Diff_CorrelationDetector	0	181	109	59	59	0	0.333333333333333	0.541284403669725	0.807339449541284	0.32	0.2	0	7.71011789744959	24.9699529956865
10	10	noFreq_Diff_CorrelationDetector	3	259	286	55	55	0	0.0571428571428571	0.192307692307692	0.381118881118881	0.0612244897959184	0.09375	0.0306122448979592	8.64413567698023	26.8819047593916
10	10	noFreq_Diff_CorrelationDetector	1	301	279	75	75	0	0.107142857142857	0.268817204301075	0.383512544802867	0.425531914893617	0	0	7.97534879211849	25.2397350828208
10	10	noFreq_Diff_CorrelationDetector	1	374	357	62	62	0	0.0579710144927536	0.173669467787115	0.361344537815126	0.25	0.0416666666666667	0.0276497695852535	8.24207952662097	24.9996097617872
10	10	noFreq_Diff_CorrelationDetector	1	337	396	129	129	0	0.144366197183099	0.325757575757576	0.48989898989899	0.403846153846154	0.173913043478261	0.0470588235294118	10.4605778103132	30.813605979042
10	10	noFreq_Diff_CorrelationDetector	3	378	507	126	126	0	0.0673076923076923	0.248520710059172	0.489151873767258	0.108695652173913	0.0416666666666667	0.0565217391304348	9.42898515454304	26.5000157899424
10	10	noFreq_Diff_CorrelationDetector	1	243	251	67	67	0	0.111111111111111	0.266932270916335	0.446215139442231	0.125	0.04	0.05	9.25048137694829	27.2055594990177
10	10	noFreq_Diff_CorrelationDetector	2	293	311	71	71	0	0.114155251141553	0.228295819935691	0.437299035369775	0.241379310344828	0.169491525423729	0.0267857142857143	10.1561888798471	29.7091749863914
10	10	noFreq_Diff_CorrelationDetector	2	273	293	80	80	0	0.144329896907216	0.273037542662116	0.593856655290102	0.441860465116279	0.1	0.0303030303030303	10.9315759374356	31.1270082448276
10	10	noFreq_Diff_CorrelationDetector	0	187	332	132	132	0	0.188679245283019	0.397590361445783	0.689759036144578	0.431034482758621	0.0540540540540541	0	9.93143710526176	26.8029129248926
20	10	noFreq_Diff_CorrelationDetector	1	224	236	109	109	0	0.246153846153846	0.461864406779661	0.754237288135593	0.411764705882353	0.261904761904762	0.0425531914893617	14.5172238483383	33.566406909479
20	10	noFreq_Diff_CorrelationDetector	2	249	367	192	192	0	0.276595744680851	0.523160762942779	0.757493188010899	0.509803921568627	0.326530612244898	0.0294117647058824	16.8965293555513	35.5323538078669
20	10	noFreq_Diff_CorrelationDetector	0	285	526	272	272	0	0.223175965665236	0.517110266159696	0.726235741444867	0.395348837209302	0.269230769230769	0.0747663551401869	18.8196118406578	37.2400262549761
20	10	noFreq_Diff_CorrelationDetector	3	266	486	215	215	0	0.235555555555556	0.44238683127572	0.730452674897119	0.480769230769231	0.130434782608696	0.142857142857143	18.629918488632	37.456801627236
20	10	noFreq_Diff_CorrelationDetector	1	197	306	194	194	0	0.406015037593985	0.633986928104575	0.797385620915033	0.620689655172414	0.28125	0.133333333333333	16.4265315057873	35.8174287270322
20	10	noFreq_Diff_CorrelationDetector	1	299	451	193	193	0	0.17004048582996	0.427937915742794	0.676274944567627	0.590909090909091	0.158730158730159	0.0181818181818182	16.1262611154934	33.8364796646187
20	10	noFreq_Diff_CorrelationDetector	1	210	333	161	161	0	0.188571428571429	0.483483483483483	0.66966966966967	0.327586206896552	0.125	0.0476190476190476	16.7481381434695	35.6935652566164
20	10	noFreq_Diff_CorrelationDetector	4	388	364	82	82	0	0.0729166666666667	0.225274725274725	0.409340659340659	0.212121212121212	0.0833333333333333	0.0416666666666667	14.7017195506976	32.457877007488
20	10	noFreq_Diff_CorrelationDetector	0	179	168	135	135	0	0.6	0.803571428571429	0.93452380952381	0.611111111111111	0	NaN	15.0832965814334	33.7467127682616
20	10	noFreq_Diff_CorrelationDetector	0	196	337	157	157	0	0.206185567010309	0.465875370919881	0.667655786350148	0.451612903225806	0.166666666666667	0	17.4447713220732	35.8373151189322
20	10	noFreq_Diff_CorrelationDetector	2	278	479	225	225	0	0.194736842105263	0.46972860125261	0.709812108559499	0.522727272727273	0.1	0.0588235294117647	15.8644105599363	35.751801301932
20	10	noFreq_Diff_CorrelationDetector	1	234	362	183	183	0	0.272151898734177	0.505524861878453	0.707182320441989	0.6	0.166666666666667	0.0307692307692308	16.2270204734233	33.3405454977285
20	10	noFreq_Diff_CorrelationDetector	0	229	301	148	148	0	0.16	0.491694352159468	0.774086378737541	0.34	0.0476190476190476	0.0851063829787234	15.7442340310757	34.8149626631875
20	10	noFreq_Diff_CorrelationDetector	3	338	388	172	172	0	0.217228464419476	0.443298969072165	0.672680412371134	0.333333333333333	0.228571428571429	0.0442477876106195	16.7684304685764	36.2954601432143
20	10	noFreq_Diff_CorrelationDetector	0	262	398	172	172	0	0.233644859813084	0.4321608040201	0.721105527638191	0.510204081632653	0.172413793103448	0.115044247787611	15.9638931041547	33.9224756465793
20	10	noFreq_Diff_CorrelationDetector	2	273	225	98	98	0	0.220779220779221	0.435555555555556	0.68	0.325581395348837	0.111111111111111	0.173076923076923	14.7754014433493	33.5835481704202
20	10	noFreq_Diff_CorrelationDetector	0	194	188	104	104	0	0.30188679245283	0.553191489361702	0.707446808510638	0.46551724137931	0.133333333333333	0	14.2467388099393	31.7977898730772
20	10	noFreq_Diff_CorrelationDetector	0	223	165	100	100	0	0.397590361445783	0.606060606060606	0.818181818181818	0.297297297297297	0.2	0.2	15.8394428475429	35.2875302084311
20	10	noFreq_Diff_CorrelationDetector	0	202	73	49	49	0	0.405405405405405	0.671232876712329	0.863013698630137	0.294117647058824	0.133333333333333	0	13.1173030638183	31.4846146221619
20	10	noFreq_Diff_CorrelationDetector	0	283	315	124	124	0	0.141509433962264	0.393650793650794	0.663492063492063	0.357142857142857	0.117647058823529	0.0898876404494382	16.989124907776	35.5443216883011
20	10	noFreq_Diff_CorrelationDetector	1	251	512	252	252	0	0.253218884120172	0.4921875	0.7265625	0.574468085106383	0.295454545454545	0.102040816326531	18.3060044045226	36.0600608934683
20	10	noFreq_Diff_CorrelationDetector	2	294	251	74	74	0	0.126829268292683	0.294820717131474	0.434262948207171	0.391304347826087	0.0833333333333333	0	15.248525602154	32.8534290631666
20	10	noFreq_Diff_CorrelationDetector	4	331	514	197	197	0	0.166089965397924	0.383268482490272	0.653696498054475	0.404761904761905	0.14	0.0802139037433155	20.347213087165	38.5232157862059
20	10	noFreq_Diff_CorrelationDetector	1	274	329	124	124	0	0.150943396226415	0.376899696048632	0.677811550151976	0.119047619047619	0.166666666666667	0	16.3392563897213	34.047221054202
20	10	noFreq_Diff_CorrelationDetector	1	176	304	199	199	0	0.413793103448276	0.654605263157895	0.904605263157895	0.589285714285714	0.3	0.142857142857143	18.2467243265643	37.751680922113
20	10	noFreq_Diff_CorrelationDetector	2	286	395	189	189	0	0.246696035242291	0.478481012658228	0.678481012658228	0.666666666666667	0.321428571428571	0.0444444444444444	19.843223620299	39.3302019664146
20	10	noFreq_Diff_CorrelationDetector	3	226	380	227	227	0	0.309859154929577	0.597368421052632	0.847368421052632	0.555555555555556	0.379310344827586	0.0576923076923077	18.9692067374908	37.6167241095099
20	10	noFreq_Diff_CorrelationDetector	2	228	263	122	122	0	0.22972972972973	0.463878326996198	0.779467680608365	0.326086956521739	0.225	0.128205128205128	18.2495075533951	37.8631465596731
20	10	noFreq_Diff_CorrelationDetector	2	195	256	127	127	0	0.315384615384615	0.49609375	0.7578125	0.517241379310345	0.0952380952380952	0.0930232558139535	17.2313426447005	35.6101100415916
20	10	noFreq_Diff_CorrelationDetector	2	247	272	135	135	0	0.248275862068966	0.496323529411765	0.727941176470588	0.553571428571429	0	0.0576923076923077	17.0691532166954	34.2168978429455
20	10	noFreq_Diff_CorrelationDetector	2	264	291	147	147	0	0.223404255319149	0.505154639175258	0.786941580756014	0.428571428571429	0.2	0	16.6136636708691	35.3185664390726
20	10	noFreq_Diff_CorrelationDetector	1	301	462	182	182	0	0.146825396825397	0.393939393939394	0.655844155844156	0.466666666666667	0.0731707317073171	0.0763888888888889	19.1857752863165	37.3593772098303
20	10	noFreq_Diff_CorrelationDetector	2	343	266	101	101	0	0.146067415730337	0.379699248120301	0.616541353383459	0.384615384615385	0.193548387096774	0.0434782608695652	17.1513404251799	35.4572456966439
20	10	noFreq_Diff_CorrelationDetector	2	334	408	129	129	0	0.139372822299652	0.316176470588235	0.558823529411765	0.4	0.233333333333333	0.0579710144927536	17.0627281009927	35.1107331979569
20	10	noFreq_Diff_CorrelationDetector	1	254	326	122	122	0	0.21078431372549	0.374233128834356	0.613496932515337	0.5625	0.121212121212121	0.0654205607476635	16.3711843988279	33.3052793782278
20	10	noFreq_Diff_CorrelationDetector	1	237	328	182	182	0	0.255681818181818	0.554878048780488	0.768292682926829	0.450980392156863	0.291666666666667	0.181818181818182	19.3394829568816	37.4036179921245
20	10	noFreq_Diff_CorrelationDetector	1	292	328	189	189	0	0.344370860927152	0.576219512195122	0.74390243902439	0.585365853658537	0.206896551724138	0.0895522388059701	16.7380060864641	33.8482771737916
20	10	noFreq_Diff_CorrelationDetector	2	341	308	84	84	0	0.171875	0.272727272727273	0.457792207792208	0.523809523809524	0	0.0689655172413793	14.8521464265217	31.6117721264204
20	10	noFreq_Diff_CorrelationDetector	2	214	363	200	200	0	0.329032258064516	0.550964187327824	0.779614325068871	0.533333333333333	0.333333333333333	0	19.1762045464879	38.491923664363
20	10	noFreq_Diff_CorrelationDetector	2	327	360	126	126	0	0.149193548387097	0.35	0.586111111111111	0.476190476190476	0.08	0.0535714285714286	16.512339456399	34.8800289402363
20	10	noFreq_Diff_CorrelationDetector	3	308	391	201	201	0	0.248780487804878	0.514066496163683	0.736572890025575	0.555555555555556	0.209302325581395	0.109090909090909	19.9689094244357	39.2537006027105
20	10	noFreq_Diff_CorrelationDetector	1	253	270	137	137	0	0.296774193548387	0.507407407407407	0.722222222222222	0.56	0.15	0.128205128205128	17.4270079150068	35.7398848290254
20	10	noFreq_Diff_CorrelationDetector	0	169	166	113	113	0	0.647058823529412	0.680722891566265	0.939759036144578	0.5	NaN	NaN	15.7591051607996	33.6107975539296
20	10	noFreq_Diff_CorrelationDetector	0	259	278	135	135	0	0.270114942528736	0.485611510791367	0.676258992805755	0.523809523809524	0.235294117647059	0.161290322580645	16.4102699952935	34.3652892389424
20	10	noFreq_Diff_CorrelationDetector	1	284	483	240	240	0	0.204633204633205	0.496894409937888	0.695652173913043	0.508771929824561	0.119047619047619	0.00847457627118644	19.4117850416263	37.9002252414194
20	10	noFreq_Diff_CorrelationDetector	2	363	283	59	59	0	0.0542986425339367	0.208480565371025	0.452296819787986	0.242424242424242	0.0588235294117647	0.0117647058823529	15.1422086253159	33.4387276937485
20	10	noFreq_Diff_CorrelationDetector	2	253	297	132	132	0	0.209302325581395	0.444444444444444	0.683501683501683	0.4	0	0.0816326530612245	16.2420717427615	34.6108717787873
20	10	noFreq_Diff_CorrelationDetector	2	247	374	185	185	0	0.207373271889401	0.494652406417112	0.679144385026738	0.526315789473684	0.111111111111111	0.0105263157894737	17.6319226765433	35.9695103047903
20	10	noFreq_Diff_CorrelationDetector	2	263	223	94	94	0	0.119402985074627	0.42152466367713	0.609865470852018	0.263157894736842	0.105263157894737	0.0597014925373134	15.6895204413191	33.6702416298647
20	10	noFreq_Diff_CorrelationDetector	1	229	258	95	95	0	0.193548387096774	0.368217054263566	0.60077519379845	0.365384615384615	0.222222222222222	0.0441176470588235	14.848997812499	32.6289265891016
20	10	noFreq_Diff_CorrelationDetector	1	377	498	144	144	0	0.142857142857143	0.289156626506024	0.566265060240964	0.425	0.131578947368421	0.0446428571428571	18.5766514532365	35.8942044256
20	10	noFreq_Diff_CorrelationDetector	1	248	105	33	33	0	0.181818181818182	0.314285714285714	0.504761904761905	0.179487179487179	0	0.0784313725490196	13.3299824342656	30.1872627418228
20	10	noFreq_Diff_CorrelationDetector	1	265	361	145	145	0	0.204545454545455	0.401662049861496	0.673130193905817	0.407407407407407	0.1875	0.0465116279069767	17.5064054687564	36.1470610418335
20	10	noFreq_Diff_CorrelationDetector	3	352	486	174	174	0	0.159375	0.358024691358025	0.590534979423868	0.433333333333333	0.0384615384615385	0.0458715596330275	19.6794600020854	38.9177829498567
20	10	noFreq_Diff_CorrelationDetector	0	163	199	137	137	0	0.635135135135135	0.688442211055276	0.894472361809045	0.583333333333333	0.4	NaN	15.3757024813662	33.8119413578723
20	10	noFreq_Diff_CorrelationDetector	1	207	299	145	145	0	0.251700680272109	0.48494983277592	0.725752508361204	0.46031746031746	0.12	0.0612244897959184	16.928379144364	35.3325532258361
20	10	noFreq_Diff_CorrelationDetector	2	237	410	210	210	0	0.224390243902439	0.51219512195122	0.780487804878049	0.476190476190476	0.230769230769231	0.0490196078431373	17.2455359204044	36.3194352909868
20	10	noFreq_Diff_CorrelationDetector	1	237	301	126	126	0	0.167883211678832	0.418604651162791	0.704318936877076	0.152173913043478	0.176470588235294	0.0769230769230769	17.0340560438684	35.1655986951762
20	10	noFreq_Diff_CorrelationDetector	3	254	216	90	90	0	0.236842105263158	0.416666666666667	0.611111111111111	0.459459459459459	0.269230769230769	0	14.838529196759	31.6252063728092
20	10	noFreq_Diff_CorrelationDetector	0	252	244	125	125	0	0.290322580645161	0.512295081967213	0.725409836065574	0.470588235294118	0.291666666666667	0.0810810810810811	16.682579461169	36.4361222709688
2	10	noFreq_Diff_CorrelationDetector	1	218	205	4	4	0	0.0161290322580645	0.0195121951219512	0.15609756097561	0.0172413793103448	0	0.0166666666666667	1.25084034815962	1.28812012274733
2	10	noFreq_Diff_CorrelationDetector	2	281	403	9	9	0	0.00460829493087558	0.0223325062034739	0.086848635235732	0.0232558139534884	0	0	1.43287938225965	1.18018876837782
2	10	noFreq_Diff_CorrelationDetector	2	447	539	34	34	0	0.0372340425531915	0.0630797773654917	0.14100185528757	0	0	0.0468227424749164	1.98927071189313	2.52573157474297
2	10	noFreq_Diff_CorrelationDetector	3	417	422	13	13	0	0.0115942028985507	0.0308056872037915	0.146919431279621	0.0294117647058824	0.0338983050847458	0	2.19437313027823	5.9145521032317
2	10	noFreq_Diff_CorrelationDetector	0	266	435	7	7	0	0.00377358490566038	0.0160919540229885	0.0758620689655172	0	0.0208333333333333	0	1.55175162206278	2.87281868139923
2	10	noFreq_Diff_CorrelationDetector	3	389	400	20	20	0	0.0362537764350453	0.05	0.11	0.024390243902439	0.08	0.0305343511450382	1.68076624673919	2.36137142961367
2	10	noFreq_Diff_CorrelationDetector	3	387	518	16	16	0	0.00294985250737463	0.0308880308880309	0.0772200772200772	0.0303030303030303	0	0	0.752026890076111	0.599408279125831
2	10	noFreq_Diff_CorrelationDetector	3	371	396	0	0	0	0	0	0.0176767676767677	0	0	0	0.781938678610633	0.561691103738953
2	10	noFreq_Diff_CorrelationDetector	1	307	323	23	23	0	0.03515625	0.0712074303405573	0.185758513931889	0.02	0.0833333333333333	0.00675675675675676	1.96357734425806	2.03373921242633
2	10	noFreq_Diff_CorrelationDetector	3	312	389	33	33	0	0.0374531835205993	0.0848329048843188	0.149100257069409	0.148936170212766	0	0.0189873417721519	2.17052685917475	2.73217025090328
2	10	noFreq_Diff_CorrelationDetector	3	369	668	19	19	0	0.00923076923076923	0.0284431137724551	0.0973053892215569	0	0.0273972602739726	0	1.40275910358141	1.78136663809973
2	10	noFreq_Diff_CorrelationDetector	3	362	482	11	11	0	0.0145985401459854	0.0228215767634855	0.0829875518672199	0	0	0.0186046511627907	0.990223544499174	0.805255278250889
2	10	noFreq_Diff_CorrelationDetector	3	293	444	87	87	0	0.14453125	0.195945945945946	0.279279279279279	0.14	0.0540540540540541	0.0390625	3.47915913756248	13.9253326384046
2	10	noFreq_Diff_CorrelationDetector	3	294	536	48	48	0	0.0549828178694158	0.0895522388059701	0.21455223880597	0.152542372881356	0	0.0211267605633803	3.29118520304836	11.3659341132322
2	10	noFreq_Diff_CorrelationDetector	4	328	446	10	10	0	0.012779552715655	0.0224215246636771	0.0717488789237668	0.0689655172413793	0	0	1.01879910049296	0.982819523092461
2	10	noFreq_Diff_CorrelationDetector	6	476	604	35	35	0	0.00472813238770686	0.0579470198675497	0.0943708609271523	0.0606060606060606	0	0	1.22599074456707	1.37063621999609
2	10	noFreq_Diff_CorrelationDetector	4	364	454	16	16	0	0.00980392156862745	0.0352422907488987	0.116740088105727	0.0666666666666667	0	0	1.60705118270056	2.12789253302787
2	10	noFreq_Diff_CorrelationDetector	3	254	271	19	19	0	0.0406091370558376	0.0701107011070111	0.202952029520295	0.12280701754386	0.025	0	1.59510663295749	2.66023310089342
2	10	noFreq_Diff_CorrelationDetector	2	371	460	12	12	0	0.00581395348837209	0.0260869565217391	0.0934782608695652	0.0363636363636364	0	0	1.74589398542969	4.87787900982466
2	10	noFreq_Diff_CorrelationDetector	5	407	563	42	42	0	0.0185185185185185	0.0746003552397869	0.136767317939609	0.121951219512195	0	0.00716845878136201	1.82032920747168	4.38321724208583
2	10	noFreq_Diff_CorrelationDetector	4	409	623	27	27	0	0.0203562340966921	0.043338683788122	0.0850722311396469	0	0	0.0258899676375405	1.82710949275692	3.61112294654224
2	10	noFreq_Diff_CorrelationDetector	3	376	511	19	19	0	0.0261627906976744	0.0371819960861057	0.0939334637964775	0.0476190476190476	0	0.0239043824701195	1.86592727259053	3.56360992170545
2	10	noFreq_Diff_CorrelationDetector	3	329	443	33	33	0	0.0384615384615385	0.0744920993227991	0.17607223476298	0.0434782608695652	0	0.0357142857142857	2.46027870860528	8.3402860701959
2	10	noFreq_Diff_CorrelationDetector	4	485	584	24	24	0	0.0262008733624454	0.0410958904109589	0.138698630136986	0.0731707317073171	0	0.0245901639344262	2.72068004826385	8.51952599328519
2	10	noFreq_Diff_CorrelationDetector	4	444	734	54	54	0	0.0294840294840295	0.0735694822888283	0.20708446866485	0.0943396226415094	0	0.021021021021021	2.48916683816804	8.38649580382546
2	10	noFreq_Diff_CorrelationDetector	4	319	591	54	54	0	0.0462633451957295	0.0913705583756345	0.192893401015228	0.26530612244898	0	0	2.36159425024049	8.15598635941754
2	10	noFreq_Diff_CorrelationDetector	2	273	303	16	16	0	0.0506912442396313	0.0528052805280528	0.207920792079208	0.0222222222222222	0.135135135135135	0.0300751879699248	2.23646383946679	6.357971041044
2	10	noFreq_Diff_CorrelationDetector	4	518	722	37	37	0	0.0263157894736842	0.0512465373961219	0.138504155124654	0.0930232558139535	0	0.0225563909774436	2.24866561881282	7.04373709523679
2	10	noFreq_Diff_CorrelationDetector	2	318	366	2	2	0	0.0037037037037037	0.00546448087431694	0.0737704918032787	0.0178571428571429	0	0	0.914115213700343	1.00668891837786
2	10	noFreq_Diff_CorrelationDetector	4	416	618	12	12	0	0	0.0194174757281553	0.0533980582524272	0	0	0	1.15399083263682	1.65562762318454
2	10	noFreq_Diff_CorrelationDetector	5	451	535	1	1	0	0	0.00186915887850467	0.0560747663551402	0	0	0	1.0951178796299	0.995960063710296
2	10	noFreq_Diff_CorrelationDetector	3	427	559	5	5	0	0.00248756218905473	0.00894454382826476	0.0411449016100179	0.0256410256410256	0	0	1.25046358681793	1.90703172465524
2	10	noFreq_Diff_CorrelationDetector	3	312	454	24	24	0	0.0269360269360269	0.052863436123348	0.140969162995595	0.0892857142857143	0.0625	0.00512820512820513	2.4521178564693	8.06449174438065
2	10	noFreq_Diff_CorrelationDetector	2	401	577	33	33	0	0.0151133501259446	0.0571923743500867	0.105719237435009	0.0677966101694915	0	0.0066006600660066	2.35870998098463	5.87510809910115
2	10	noFreq_Diff_CorrelationDetector	5	309	359	35	35	0	0.0355731225296443	0.0974930362116992	0.136490250696379	0.170212765957447	0	0	1.48778481912786	2.0372543099051
2	10	noFreq_Diff_CorrelationDetector	2	326	362	27	27	0	0.013745704467354	0.074585635359116	0.116022099447514	0.0851063829787234	0	0	1.33956223845406	1.53956113771842
2	10	noFreq_Diff_CorrelationDetector	2	232	222	33	33	0	0.0617977528089888	0.148648648648649	0.207207207207207	0.161764705882353	0	0	1.10855958921816	1.34879370108195
2	10	noFreq_Diff_CorrelationDetector	2	368	544	35	35	0	0.0117647058823529	0.0643382352941176	0.101102941176471	0.0681818181818182	0	0	1.23156678608009	1.54627188222221
2	10	noFreq_Diff_CorrelationDetector	4	342	521	18	18	0	0.00946372239747634	0.0345489443378119	0.119001919385797	0.0566037735849057	0	0	1.52521823441605	3.52467150247666
2	10	noFreq_Diff_CorrelationDetector	4	348	325	23	23	0	0.0339622641509434	0.0707692307692308	0.141538461538462	0.0789473684210526	0	0.0252525252525253	1.76320069431273	3.33617149479996
2	10	noFreq_Diff_CorrelationDetector	7	451	972	16	16	0	0.00234741784037559	0.0164609053497942	0.0627572016460905	0.0238095238095238	0	0	1.19659124844353	1.29229037703998
2	10	noFreq_Diff_CorrelationDetector	1	237	151	1	1	0	0	0.00662251655629139	0.0397350993377483	0	0	0	1.22136775271777	1.44203790096999
2	10	noFreq_Diff_CorrelationDetector	4	361	478	6	6	0	0	0.0125523012552301	0.0564853556485356	0	0	0	0.872584097189474	0.991429370161567
2	10	noFreq_Diff_CorrelationDetector	4	421	517	8	8	0	0	0.0154738878143133	0.0676982591876209	0	0	0	1.16270786962969	1.61944806801806
2	10	noFreq_Diff_CorrelationDetector	3	358	276	4	4	0	0.00444444444444444	0.0144927536231884	0.0507246376811594	0.03125	0	0	0.812592532505138	0.83208030934944
2	10	noFreq_Diff_CorrelationDetector	4	590	965	6	6	0	0	0.00621761658031088	0.0196891191709845	0	0	0	0.707227218083292	0.188515706358749
2	10	noFreq_Diff_CorrelationDetector	5	407	402	3	3	0	0	0.00746268656716418	0.0373134328358209	0	0	0	1.04607073751733	0.489984831176661
2	10	noFreq_Diff_CorrelationDetector	1	241	317	8	8	0	0.00606060606060606	0.0252365930599369	0.0788643533123028	0.0227272727272727	0	0	0.807245858859651	0.785702372608278
2	10	noFreq_Diff_CorrelationDetector	2	373	349	15	15	0	0.0138888888888889	0.0429799426934097	0.0830945558739255	0.09375	0	0	1.57647267716963	1.67879836450027
2	10	noFreq_Diff_CorrelationDetector	3	291	303	13	13	0	0	0.0429042904290429	0.0858085808580858	0	0	0	1.61735734961092	2.07368707992373
2	10	noFreq_Diff_CorrelationDetector	2	307	395	35	35	0	0.03515625	0.0886075949367089	0.179746835443038	0.0689655172413793	0.05	0.0165745856353591	1.84108515744231	4.2879951526694
[truncated: 1,489 more rows]
