# Supplementary material for: A sensorimotor model shows why a spectral jamming avoidance response does not help bats deal with jamming
Source: eLife. 2020 Jul 28;9:e55539. doi: 10.7554/eLife.55539 (PMC7406351; doi:10.7554/eLife.55539)
Supplement: Source data 2. [file elife-55539-data2.xlsx]

## Sheet: FINAL oct 2019
Fig	Caption	Type	Source / script	DATA table/ file	Remarks
General	MATLAB BatSimulation	Source code executing the model	Bat Simulation _eLife_270620.rar		All source code, scripts and functions required to run the model
			BatGUI1	DefaultParameters.mat	A GUI (Graphical User Interface) for executing the model with user's defined parameters.
Figure 1	Examples of individual and group hunting of the simulated bats	Model Overview
Fig1 panelA		One BAT	Figure1_source(BatDATA, 1, 1, 3, 3, 30)	BatData_214216_1BAT.mat	BatDATAxxx.mat are the output files of the simulation execution
Fig 1 panelB		five Bats	Figure1_source(BatDATA, 5, 1, 180, 244 , 1)	BatData_001515_5BATS.mat	Written the input parameters of the funtion to get the same figure. The script uses the following functions: BuildRecSonongram( ), ReconsrtructChirpFromBatDATA( )
Figure1 - supp1	Simulated and real bats flight characteristics	Comparison between real and sim: xy position, velocities, box plot		fig1_supp1_data_threeBats_5_clementine.mat, fig1_supp1_data_threeBats_5_dolores.mat, fig1_supp1_data_threeBats_5_lucy.mat	data of real flying bats in the from the tracking system
Figure 2	The effect of JAR on detection	receiver performance: JAR no JAR for correlation and Filter Bank
Fig 2 panels A-D		total of 7 panels - for 20 prey items only	Figure2_source(data_table, field_to_plot, filterbank_flag, current_fig)	figure2_data_filterbank, figure2_data_correlation
Fig2 supp1	Analysis of correlation gains between signals of search (A), approach (B-C) and buzz (D) phases	Signal similarity for correlations		fig2_supp1_data_correlation_gain
Fig2 supp 2	Number of prey detection events			figure2_data_filterbank, figure2_data_correlation
Fig2 supp 6	Implementation of a half-wave rectifier			fig2_supp6_data_filterbank, fig2_supp6_data_correlation
Figure 3	Hunting Performance for different receiving models	Hunting Performance
Fig_3a1-3		NumOfCatches vs NumOfBats	Figure3_panel1_source(data_table)	figure3_data_3preyitems
Fig_3b1-3		Masking Effect	Figure3_panel2_source(output_struct)	figure3_data_10preyitems
Fig_3c1-3		Jamming Probabilty	Figure3_panel3_source(data_table)	figure3_data_20preyitems
Fig3 supp1	Hunting performance for the filter-bank receiver	Hunting Performance
Fig3 supp1 panels a1-3		NumOfCatches vs NumOfBats		fig3_supp1_data_3preyitems
Fig3 supp1 panels b1-3		Masking Effect		fig3_supp1_data_10preyitems
Fig3 supp1 panels c1-3		Jamming Probabilty		fig3_supp1_data_20preyitems
Fig3 supp1	The influence of background clutter echoes			fig3_supp2_data_clutter
Figure 4	The influence of signal power, signal duration and detection threshold	Signal Paramaters
Fig 4a1-2		Tx level -captures	Figure4_source_level(data_table)	figure4_data_call_level
		Tx level - Masking effect
Fig 4b1-2		Pulse Duration	Figure4_source_duration(data_table)	figure4_data_call_duration
Fig 4c1-2		Detection Thershold: Performance Vs Bats	Figure4_source_detect_th(data_table)	figure4_data_detection_th
Fig4-supp 1	Frequency- shift with no JAR			fig4_supp1_data_freqshift_noJAR
